# Supplementary material for: Binary outcomes of enhancer activity underlie stable random monoallelic expression
Source: eLife journal article supplement (doi:10.7554/elife.74204), 2022-03-22

1-1kb+ ladder Invitrogen

2- non-targeting guide set 1

3- non-targeting guide set 2

4- *Klrc1*<sub>5'E</sub> flanking guides

All other lanes are not relevant to  
the experiment depicted in the paper

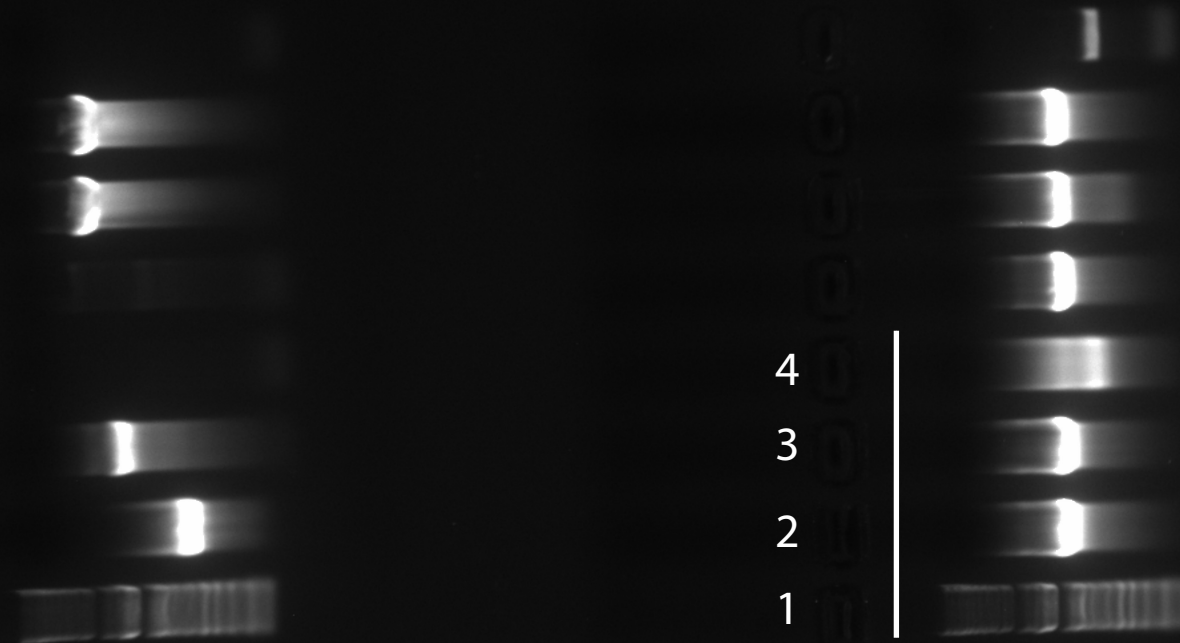

Supplement: data2 [file Figure1--figure supplement 2 E annotated.pdf › Original gel images/Figure1--figure supplement 2 E annotated.pdf]
