# Supplementary material for: Binary outcomes of enhancer activity underlie stable random monoallelic expression
Source: eLife. 2022 May 26;11:e74204. doi: 10.7554/eLife.74204 (PMC9135403; doi:10.7554/eLife.74204)
Supplement: Source data 1. — xlsx file containing a list of called NK cell promoters (first tab), NK cell enhancers (second tab), 51,650 ATAC-seq peaks (1kb windows centered at ATAC-seq peak midpoints over which the H3K4me1:H3K4me3 ratio was calculated) in NK cells (third tab), and labeled promoters and enhancers investigated in this study (fourth tab). See methods for a description of how these lists were generated. [file elife-74204-data1.xlsx]

## Sheet: NK cell promoters
chr1	start	stop	gene	strand
chr1	4785708	4785709	Mrpl15_1	-
chr1	4807894	4807895	Lypla1_1	+
chr1	4857790	4857791	Tcea1_1	+
chr1	5083128	5083129	Atp6v1h_1	+
chr1	6214663	6214664	Rb1cc1_1	+
chr1	7088983	7088984	Pcmtd1_1	+
chr1	7089168	7089169	Pcmtd1_2	+
chr1	7397945	7397946	AK043789_1	-
chr1	9748252	9748253	Vcpip1_2	-
chr1	9748394	9748395	Vcpip1_1	-
chr1	9944117	9944118	Snhg6_1	-
chr1	10037944	10037945	Cops5_1	-
chr1	10038162	10038163	Cops5_2	-
chr1	10038216	10038217	Cspp1_1	+
chr1	10039837	10039838	Cspp1_2	+
chr1	10216562	10216563	Arfgef1_1	-
chr1	13372441	13372442	Ncoa2_2	-
chr1	13374043	13374044	Ncoa2_1	-
chr1	13589863	13589864	Tram1_1	-
chr1	13660519	13660520	Lactb2_1	-
chr1	15805654	15805655	Terf1_1	+
chr1	16104405	16104406	Rpl7_1	-
chr1	16105863	16105864	Rdh10_1	+
chr1	16619288	16619289	Ube2w_1	-
chr1	16657041	16657042	Eloc_1	-
chr1	16665248	16665249	Tmem70_1	+
chr1	16688432	16688433	Ly96_1	+
chr1	20820259	20820260	Mcm3_1	-
chr1	21218598	21218599	Tmem14a_1	+
chr1	21349602	21349603	Khdc1a_1	+
chr1	21368276	21368277	Khdc1c_1	+
chr1	21383491	21383492	Khdc1b_1	+
chr1	24005631	24005632	Sdhaf4_1	-
chr1	24678573	24678574	Lmbrd1_2	+
chr1	24678737	24678738	Lmbrd1_1	+
chr1	30873900	30873901	Phf3_1	-
chr1	30948675	30948676	Ptp4a1_2	-
chr1	30949756	30949757	Ptp4a1_1	-
chr1	33669785	33669786	Prim2_1	-
chr1	33669868	33669869	1700001G17Rik_1	+
chr1	33814533	33814534	Zfp451_1	-
chr1	34433286	34433287	Mir5103_1	-
chr1	34439352	34439353	Ccdc115_1	-
chr1	34439683	34439684	Ccdc115_2	-
chr1	34439900	34439901	Imp4_1	+
chr1	34472735	34472736	Ptpn18_1	+
chr1	34843012	34843013	Fam168b_1	-
chr1	34849984	34849985	Plekhb2_1	+
chr1	36244160	36244161	Uggt1_2	-
chr1	36244271	36244272	Uggt1_1	-
chr1	36273434	36273435	Neurl3_1	-
chr1	36307753	36307754	Arid5a_1	+
chr1	36308001	36308002	Arid5a_2	+
chr1	36369131	36369132	Kansl3_1	-
chr1	36445256	36445257	Lman2l_1	-
chr1	36471596	36471597	Cnnm4_1	+
chr1	36547200	36547201	Ankrd39_1	-
chr1	36557522	36557523	Sema4c_1	-
chr1	36558360	36558361	Sema4c_2	-
chr1	36691561	36691562	Cox5b_1	+
chr1	36709938	36709939	Actr1b_1	-
chr1	36761830	36761831	Zap70_1	+
chr1	36939612	36939613	Tmem131_1	-
chr1	37029332	37029333	Vwa3b_1	+
chr1	37299898	37299899	AK051424_1	+
chr1	37430050	37430051	Coa5_1	-
chr1	37430183	37430184	Unc50_1	+
chr1	37496142	37496143	Mgat4a_2	-
chr1	37540986	37540987	Mgat4a_1	-
chr1	37864806	37864807	Tsga10_1	-
chr1	37865073	37865074	Tsga10_2	-
chr1	37890383	37890384	Mitd1_1	-
chr1	37890540	37890541	Mrpl30_1	+
chr1	37997204	37997205	Txndc9_1	-
chr1	37997980	37997981	Eif5b_2	+
chr1	37998123	37998124	Eif5b_1	+
chr1	38664954	38664955	Aff3_1	-
chr1	38898152	38898153	Chst10_1	-
chr1	38987813	38987814	Pdcl3_1	+
chr1	39367910	39367911	Rpl31_1	+
chr1	39535821	39535822	Cnot11_1	+
chr1	39577351	39577352	Rnf149_1	-
chr1	39900939	39900940	Map4k4_1	+
chr1	40324595	40324596	Il1rl2_1	+
chr1	40465691	40465692	Il18r1_2	+
chr1	40465990	40465991	Il18r1_1	+
chr1	40515406	40515407	Il18rap_1	+
chr1	40790656	40790657	Mfsd9_1	-
chr1	43092453	43092454	Tgfbrap1_1	-
chr1	43098646	43098647	Tgfbrap1_2	-
chr1	43098719	43098720	AI597479_1	+
chr1	43445797	43445798	Nck2_1	+
chr1	43447217	43447218	Nck2_2	+
chr1	43827761	43827762	Uxs1_1	-
chr1	43934050	43934051	Tpp2_1	+
chr1	44102387	44102388	Tex30_1	-
chr1	44147915	44147916	Ercc5_1	+
chr1	45795500	45795501	Wdr75_1	+
chr1	46853516	46853517	Slc39a10_1	-
chr1	51478398	51478399	Nabp1_1	-
chr1	52008227	52008228	Stat4_3	+
chr1	52008671	52008672	Stat4_1	+
chr1	52119489	52119490	Stat1_1	+
chr1	52233217	52233218	Gls_1	-
chr1	52500393	52500394	Nab1_1	-
chr1	52630737	52630738	Nemp2_1	+
chr1	52727317	52727318	Mfsd6_1	-
chr1	52817749	52817750	Inpp1_1	-
chr1	52845047	52845048	Hibch_1	+
chr1	53297014	53297015	Pms1_1	-
chr1	53297110	53297111	Ormdl1_1	+
chr1	53313652	53313653	Osgepl1_1	+
chr1	53352660	53352661	Asnsd1_1	-
chr1	53776647	53776648	Stk17b_2	-
chr1	53785180	53785181	Stk17b_1	-
chr1	54926343	54926344	Ankrd44_1	-
chr1	55027394	55027395	Sf3b1_1	-
chr1	55052850	55052851	Coq10b_1	+
chr1	55087835	55087836	Hspd1_1	-
chr1	55088312	55088313	Hspe1_1	+
chr1	55131286	55131287	Mob4_1	+
chr1	57377523	57377524	4930558J18Rik_1	-
chr1	57377622	57377623	1700066M21Rik_1	+
chr1	57406470	57406471	Tyw5_2	-
chr1	57406547	57406548	Maip1_2	+
chr1	57406683	57406684	Tyw5_1	-
chr1	57406758	57406759	Maip1_1	+
chr1	57970078	57970079	Kctd18_1	-
chr1	58393135	58393136	Bzw1_1	+
chr1	58393725	58393726	Bzw1_2	+
chr1	58422846	58422847	Clk1_2	-
chr1	58424021	58424022	Clk1_1	-
chr1	58445274	58445275	Nif3l1_1	+
chr1	58445485	58445486	Ppil3_1	-
chr1	58445515	58445516	Nif3l1_2	+
chr1	58586282	58586283	Fam126b_1	-
chr1	58586387	58586388	Ndufb3_2	+
chr1	58586601	58586602	Ndufb3_1	+
chr1	58652591	58652592	Gm20257_1	+
chr1	58711494	58711495	Cflar_2	+
chr1	58713293	58713294	Cflar_1	+
chr1	58795421	58795422	Casp8_1	+
chr1	58802613	58802614	Casp8_2	+
chr1	58973429	58973430	Trak2_1	-
chr1	58973565	58973566	Stradb_1	+
chr1	59237202	59237203	Als2_1	-
chr1	59670802	59670803	Sumo1_1	-
chr1	59684987	59684988	Nop58_1	+
chr1	59764278	59764279	Bmpr2_1	+
chr1	59912982	59912983	Fam117b_1	+
chr1	60097619	60097620	Wdr12_3	-
chr1	60097900	60097901	Wdr12_2	-
chr1	60098174	60098175	Wdr12_1	-
chr1	60098273	60098274	Carf_1	+
chr1	60180578	60180579	Nbeal1_1	+
chr1	60343319	60343320	Cyp20a1_1	+
chr1	60566712	60566713	Raph1_1	-
chr1	60746409	60746410	Cd28_1	+
chr1	60778745	60778746	AK009383_1	+
chr1	60977913	60977914	Icos_1	+
chr1	63114314	63114315	Ino80d_1	-
chr1	63114448	63114449	Ino80dos_1	+
chr1	63176666	63176667	Ndufs1_1	-
chr1	63176861	63176862	Eef1b2_2	+
chr1	63177128	63177129	Eef1b2_1	+
chr1	64121432	64121433	Klf7_1	-
chr1	64532847	64532848	Creb1_1	+
chr1	64534463	64534464	Creb1_2	+
chr1	64617201	64617202	Mettl21a_1	-
chr1	64737747	64737748	Fzd5_1	-
chr1	64956738	64956739	Plekhm3_1	-
chr1	65179071	65179072	Idh1_1	-
chr1	66700883	66700884	Rpe_1	+
chr1	66817542	66817543	Kansl1l_1	-
chr1	66863276	66863277	Acadl_1	-
chr1	69685949	69685950	Ikzf2_1	-
chr1	71102943	71102944	Bard1_1	-
chr1	72307426	72307427	Xrcc5_1	+
chr1	72307527	72307528	Xrcc5_2	+
chr1	72583272	72583273	Smarcal1_1	+
chr1	72711289	72711290	Rpl37a_1	+
chr1	74236543	74236544	Arpc2_1	+
chr1	74304176	74304177	Tmbim1_1	-
chr1	74304401	74304402	Tmbim1_2	-
chr1	74391702	74391703	Ctdsp1_1	+
chr1	74505702	74505703	Usp37_2	-
chr1	74505824	74505825	Usp37_1	-
chr1	74506059	74506060	Cnot9_1	+
chr1	74506350	74506351	Cnot9_2	+
chr1	74588013	74588014	Zfp142_1	-
chr1	74588132	74588133	Zfp142_2	-
chr1	74588362	74588363	Bcs1l_1	+
chr1	74601380	74601381	Rnf25_1	-
chr1	74601472	74601473	Stk36_1	+
chr1	75125189	75125190	Nhej1_1	-
chr1	75141736	75141737	Cnppd1_2	-
chr1	75142671	75142672	Cnppd1_1	-
chr1	75142787	75142788	Retreg2_1	+
chr1	75168645	75168646	Zfand2b_1	+
chr1	75168763	75168764	Zfand2b_2	+
chr1	75191688	75191689	Atg9a_2	-
chr1	75191941	75191942	Atg9a_1	-
chr1	75192188	75192189	Ankzf1_1	+
chr1	75210751	75210752	Glb1l_2	-
chr1	75210837	75210838	Stk16_1	+
chr1	75219252	75219253	Tuba4a_1	-
chr1	75236453	75236454	Dnajb2_1	+
chr1	75236771	75236772	Dnajb2_2	+
chr1	75317017	75317018	Dnpep_1	-
chr1	75435973	75435974	Gmppa_1	+
chr1	75479115	75479116	Chpf_1	-
chr1	75521558	75521559	Stk11ip_1	+
chr1	78488858	78488859	Farsb_1	-
chr1	78537662	78537663	Mogat1_1	+
chr1	78657882	78657883	Acsl3_1	+
chr1	78658350	78658351	Utp14b_1	+
chr1	79761708	79761709	Wdfy1_1	-
chr1	80213844	80213845	Fam124b_1	-
chr1	80340640	80340641	Cul3_1	-
chr1	80758523	80758524	Dock10_1	-
chr1	82316590	82316591	Rhbdd1_1	+
chr1	82724917	82724918	Mff_1	+
chr1	82725138	82725139	AK043693_1	-
chr1	84839348	84839349	Trip12_1	-
chr1	84839864	84839865	Fbxo36_1	+
chr1	84840315	84840316	Trip12_2	-
chr1	84840513	84840514	Trip12_3	-
chr1	85736560	85736561	A630001G21Rik_1	-
chr1	85793437	85793438	Cab39_1	+
chr1	85961056	85961057	Gpr55_1	-
chr1	86064640	86064641	Psmd1_1	+
chr1	86303233	86303234	B3gnt7_2	+
chr1	86303495	86303496	B3gnt7_1	+
chr1	86359363	86359364	Ncl_1	-
chr1	86359668	86359669	C130036L24Rik_1	+
chr1	86526720	86526721	Ptma_1	+
chr1	86582537	86582538	Pde6d_1	-
chr1	86703818	86703819	Dis3l2_1	+
chr1	87213963	87213964	Eif4e2_1	+
chr1	87214335	87214336	Eif4e2_2	+
chr1	87620375	87620376	Inpp5d_1	+
chr1	87756055	87756056	Atg16l1_1	+
chr1	87853275	87853276	Dgkd_1	+
chr1	88008535	88008536	Usp40_1	-
chr1	88095111	88095112	Ugt1a7c_1	+
chr1	88701697	88701698	Arl4c_2	-
chr1	88702133	88702134	Arl4c_1	-
chr1	90603498	90603499	Cops8_1	+
chr1	91053464	91053465	Lrrfip1_2	+
chr1	91250336	91250337	Ube2f_1	+
chr1	91250502	91250503	Ube2f_2	+
chr1	91298345	91298346	Scly_1	+
chr1	91351065	91351066	Klhl30_1	+
chr1	91351188	91351189	Klhl30_2	+
chr1	91398796	91398797	Ilkap_1	-
chr1	91413219	91413220	Hes6_1	-
chr1	91459305	91459306	Per2_1	-
chr1	91540536	91540537	Asb1_1	+
chr1	92180298	92180299	Hdac4_1	-
chr1	92473776	92473777	Ndufa10_1	-
chr1	92641960	92641961	Cops9_1	-
chr1	92831624	92831625	Gpc1_1	+
chr1	92831850	92831851	Gpc1_2	+
chr1	92907029	92907030	Dusp28_1	+
chr1	92910711	92910712	5033417F24Rik_1	-
chr1	92910822	92910823	Rnpepl1_1	+
chr1	92934455	92934456	Capn10_1	+
chr1	93305868	93305869	Mterf4_1	-
chr1	93445651	93445652	Hdlbp_1	-
chr1	93478814	93478815	Hdlbp_2	-
chr1	93478992	93478993	Sept2_1	+
chr1	93635666	93635667	Stk25_1	-
chr1	93754847	93754848	Thap4_1	-
chr1	93755022	93755023	Atg4b_1	+
chr1	93801896	93801897	Dtymk_1	-
chr1	93803974	93803975	Ing5_1	+
chr1	93825239	93825240	D2hgdh_1	+
chr1	95313692	95313693	Fam174a_1	+
chr1	95667589	95667590	St8sia4_1	-
chr1	97661026	97661027	D1Ertd622e_3	-
chr1	97661680	97661681	D1Ertd622e_2	-
chr1	97661962	97661963	D1Ertd622e_1	-
chr1	97770049	97770050	Ppip5k2_1	-
chr1	97770178	97770179	Gin1_1	+
chr1	98131493	98131494	1810006J02Rik_1	+
chr1	105990421	105990422	Zcchc2_1	+
chr1	106171434	106171435	Gm20753_1	-
chr1	106171905	106171906	Phlpp1_1	+
chr1	106714006	106714007	Bcl2_2	-
chr1	106714274	106714275	Bcl2_1	-
chr1	106759668	106759669	Kdsr_1	-
chr1	106796643	106796644	Vps4b_1	-
chr1	118311181	118311182	Tsn_1	-
chr1	118321871	118321872	Nifk_1	+
chr1	118389430	118389431	Clasp1_1	+
chr1	118459265	118459266	2900060B14Rik_1	-
chr1	119913172	119913173	Tmem177_1	-
chr1	120073761	120073762	Tmem37_1	-
chr1	120121016	120121017	Dbi_1	-
chr1	120121173	120121174	3110009E18Rik_1	+
chr1	120265280	120265281	Steap3_1	-
chr1	121327757	121327758	Insig2_1	-
chr1	125435483	125435484	Actr3_1	-
chr1	125435672	125435673	Actr3_2	-
chr1	125561035	125561036	Slc35f5_1	+
chr1	127205017	127205018	Mgat5_1	+
chr1	127206255	127206256	Mgat5_2	+
chr1	127677761	127677762	Tmem163_1	-
chr1	127677939	127677940	Tmem163_2	-
chr1	127774019	127774020	2900009J06Rik_1	-
chr1	127774216	127774217	Ccnt2_1	+
chr1	127868791	127868792	Rab3gap1_1	+
chr1	128102462	128102463	Zranb3_1	-
chr1	128103029	128103030	Zranb3_2	-
chr1	128103345	128103346	R3hdm1_1	+
chr1	128244149	128244150	Ubxn4_1	+
chr1	128359653	128359654	Mcm6_1	-
chr1	128417325	128417326	Dars_1	-
chr1	128592298	128592299	Cxcr4_1	-
chr1	130462715	130462716	Cd55_1	-
chr1	130715803	130715804	Pfkfb2_1	-
chr1	130717326	130717327	Yod1_1	+
chr1	131097833	131097834	Mapkapk2_1	-
chr1	131153195	131153196	Eif2d_1	+
chr1	131200114	131200115	Rassf5_2	-
chr1	131279562	131279563	Ikbke_1	-
chr1	131526540	131526541	Srgap2_3	-
chr1	131527316	131527317	Srgap2_1	-
chr1	131527988	131527989	Fam72a_1	+
chr1	131638331	131638332	Ctse_1	+
chr1	131638457	131638458	Ctse_3	+
chr1	131828011	131828012	Slc41a1_1	+
chr1	131867520	131867521	Rab29_1	+
chr1	131910529	131910530	Nucks1_1	+
chr1	132007619	132007620	Elk4_1	+
chr1	132008344	132008345	Elk4_2	+
chr1	132316136	132316137	Nuak2_1	+
chr1	132342062	132342063	AK155877_1	+
chr1	132417446	132417447	Dstyk_2	+
chr1	132417580	132417581	Dstyk_1	+
chr1	132477379	132477380	Rbbp5_1	+
chr1	133025337	133025338	Mdm4_1	-
chr1	133131276	133131277	Ppp1r15b_1	+
chr1	133660960	133660961	Zbed6_1	-
chr1	133661370	133661371	Zc3h11a_1	-
chr1	133690107	133690108	Lax1_1	-
chr1	133800703	133800704	Atp2b4_1	-
chr1	134079116	134079117	Btg2_1	-
chr1	134111241	134111242	Chit1_1	+
chr1	134361952	134361953	Tmem183a_1	-
chr1	134415469	134415470	Adipor1_1	+
chr1	134415772	134415773	Adipor1_2	+
chr1	134455530	134455531	Klhl12_1	+
chr1	134494647	134494648	Rabif_1	+
chr1	134560225	134560226	Kdm5b_1	+
chr1	134955924	134955925	Ppp1r12b_1	-
chr1	134962595	134962596	Ube2t_1	+
chr1	135132575	135132576	Ptprv_1	-
chr1	135132710	135132711	Ptpn7_1	+
chr1	135133198	135133199	Ptpn7_2	+
chr1	135146814	135146815	Arl8a_1	+
chr1	135284022	135284023	Rnpep_1	-
chr1	135430435	135430436	Ipo9_1	-
chr1	135729222	135729223	Csrp1_1	+
chr1	136131181	136131182	Gm15850_1	-
chr1	136131389	136131390	Kif21b_1	+
chr1	136260925	136260926	Gpr25_1	-
chr1	136415315	136415316	Ddx59_1	+
chr1	136415518	136415519	9230116N13Rik_1	-
chr1	136624938	136624939	Zfp281_1	+
chr1	136683385	136683386	Gm19705_1	+
chr1	136683666	136683667	Gm19705_2	+
chr1	138175298	138175299	Ptprc_1	-
chr1	138619742	138619743	Nek7_1	-
chr1	138963777	138963778	Dennd1b_1	+
chr1	143702811	143702812	Cdc73_1	-
chr1	143739615	143739616	Glrx2_1	+
chr1	143776995	143776996	Trove2_1	-
chr1	143777304	143777305	Uchl5_1	+
chr1	144004148	144004149	Rgs2_1	-
chr1	144249058	144249059	Rgs1_1	-
chr1	144775426	144775427	Rgs18_1	-
chr1	150392749	150392750	BC003331_1	-
chr1	150392831	150392832	Tpr_2	+
chr1	150393061	150393062	BC003331_2	-
chr1	150393383	150393384	Tpr_1	+
chr1	151344547	151344548	Ivns1abp_1	+
chr1	151428387	151428388	Swt1_1	-
chr1	151428647	151428648	Trmt1l_1	+
chr1	151500810	151500811	Rnf2_1	-
chr1	151571463	151571464	Fam129a_1	+
chr1	151755020	151755021	2810414N06Rik_1	-
chr1	151755352	151755353	Edem3_1	+
chr1	152090282	152090283	1700025G04Rik_1	-
chr1	152625160	152625161	Rgl1_1	-
chr1	152768904	152768905	Arpc5_2	+
chr1	152902644	152902645	Smg7_1	-
chr1	153487650	153487651	Dhx9_1	-
chr1	153740352	153740353	Rgs16_1	+
chr1	153749461	153749462	Rnasel_2	+
chr1	153752009	153752010	Rnasel_1	+
chr1	153752859	153752860	Rnasel_3	+
chr1	153899945	153899946	Glul_1	+
chr1	153900204	153900205	AK044033_1	-
chr1	153900584	153900585	Glul_2	+
chr1	155099631	155099632	Ier5_1	-
chr1	155146803	155146804	Mr1_1	-
chr1	155158741	155158742	Stx6_1	+
chr1	155558121	155558122	Acbd6_1	+
chr1	155558393	155558394	Acbd6_2	+
chr1	155812835	155812836	Qsox1_1	-
chr1	155973182	155973183	Cep350_1	-
chr1	156034773	156034774	Tor1aip1_3	-
chr1	156035726	156035727	Tor1aip2_3	+
chr1	156036043	156036044	Tor1aip1_2	-
chr1	156036444	156036445	Tor1aip1_1	-
chr1	156040892	156040893	Tor1aip2_1	+
chr1	156474239	156474240	Soat1_1	-
chr1	156558794	156558795	Abl2_1	+
chr1	156674335	156674336	Tor3a_1	-
chr1	159232310	159232311	Cop1_1	+
chr1	160044383	160044384	4930523C07Rik_1	+
chr1	160044578	160044579	4930523C07Rik_2	+
chr1	160195259	160195260	Mrps14_1	+
chr1	160212818	160212819	Cacybp_1	-
chr1	160307332	160307333	Rabgap1l_3	-
chr1	160309093	160309094	Rabgap1l_2	-
chr1	160792849	160792850	Rabgap1l_1	-
chr1	160906410	160906411	Rc3h1_1	+
chr1	161034802	161034803	Zbtb37_1	-
chr1	161035165	161035166	Gas5_1	+
chr1	161070642	161070643	Dars2_1	-
chr1	161070835	161070836	Cenpl_2	+
chr1	161070999	161071000	Cenpl_1	+
chr1	161131450	161131451	Klhl20_1	-
chr1	161251165	161251166	Prdx6_1	-
chr1	161788368	161788369	Fasl_2	-
chr1	161788477	161788478	Fasl_1	-
chr1	161876662	161876663	Suco_1	-
chr1	161969226	161969227	Pigc_1	+
chr1	162570626	162570627	Vamp4_1	+
chr1	162740507	162740508	Prrc2c_1	-
chr1	163403632	163403633	Gorab_1	-
chr1	163779645	163779646	Kifap3_1	+
chr1	163929795	163929796	Scyl3_1	+
chr1	163994777	163994778	BC055324_1	-
chr1	163994888	163994889	Mettl18_1	+
chr1	164062084	164062085	Sell_1	+
chr1	164249074	164249075	Slc19a2_1	+
chr1	164275612	164275613	Ccdc181_1	+
chr1	164307470	164307471	Blzf1_1	-
chr1	164307725	164307726	Nme7_1	+
chr1	164458004	164458005	Atp1b1_2	-
chr1	164458355	164458356	Atp1b1_1	-
chr1	164935524	164935525	Xcl1_1	-
chr1	165194341	165194342	Sft2d2_1	-
chr1	165236936	165236937	Tiprl_1	-
chr1	165460451	165460452	Dcaf6_1	-
chr1	165460607	165460608	AK008044_1	+
chr1	165461259	165461260	Mpc2_1	+
chr1	165708063	165708064	Rcsd1_1	-
chr1	165709784	165709785	AK020768_1	-
chr1	165788753	165788754	Cd247_1	+
chr1	166002628	166002629	Pou2f1_1	-
chr1	166003038	166003039	KY467518_1	+
chr1	166379199	166379200	Tada1_1	+
chr1	166409827	166409828	Pogk_1	-
chr1	167001462	167001463	Fam78b_1	+
chr1	167308752	167308753	Tmco1_1	+
chr1	167350006	167350007	Aldh9a1_2	+
chr1	167350224	167350225	Aldh9a1_1	+
chr1	169531407	169531408	Nuf2_1	-
chr1	170174788	170174789	Uap1_2	-
chr1	170174945	170174946	Uap1_1	-
chr1	170215406	170215407	Uhmk1_1	-
chr1	170277261	170277262	Sh2d1b1_1	+
chr1	170589801	170589802	Nos1ap_1	-
chr1	170867767	170867768	Atf6_1	-
chr1	170976059	170976060	Fcgr2b_1	-
chr1	171121660	171121661	Cfap126_2	+
chr1	171123151	171123152	Cfap126_1	+
chr1	171150602	171150603	Sdhc_1	-
chr1	171222447	171222448	Tomm40l_1	-
chr1	171234306	171234307	Fcer1g_1	-
chr1	171247106	171247107	Ndufs2_1	-
chr1	171270333	171270334	B4galt3_1	+
chr1	171280937	171280938	Ppox_2	-
chr1	171281136	171281137	Ppox_1	-
chr1	171287939	171287940	Usp21_1	-
chr1	171294770	171294771	Ufc1_1	-
chr1	171294946	171294947	Ufc1_2	-
chr1	171345640	171345641	Nit1_1	-
chr1	171345698	171345699	Pfdn2_1	+
chr1	171388969	171388970	Arhgap30_1	+
chr1	171389191	171389192	Arhgap30_2	+
chr1	171411312	171411313	Usf1_1	+
chr1	171411751	171411752	Usf1_2	+
chr1	171503431	171503432	Alyref2_1	+
chr1	171503643	171503644	Alyref2_2	+
chr1	171559192	171559193	Cd244_1	+
chr1	171607348	171607349	Ly9_1	-
chr1	171648972	171648973	Slamf7_1	-
chr1	171682052	171682053	Cd48_1	+
chr1	171840631	171840632	Cd84_2	+
chr1	171917461	171917462	Slamf6_1	+
chr1	171917677	171917678	Slamf6_2	+
chr1	172082517	172082518	Copa_2	+
chr1	172082692	172082693	Ncstn_1	-
chr1	172082827	172082828	Copa_1	+
chr1	172126772	172126773	Pex19_1	+
chr1	172148165	172148166	Dcaf8_1	+
chr1	172206707	172206708	Pea15a_1	-
chr1	172312386	172312387	Igsf8_1	+
chr1	172376555	172376556	Pigm_1	+
chr1	172500278	172500279	Tagln2_1	+
chr1	172602524	172602525	Fcrl6_1	-
chr1	172632936	172632937	Dusp23_1	-
chr1	173420611	173420612	Aim2_1	+
chr1	173535956	173535957	Ifi214_1	-
chr1	173599276	173599277	Ifi213_1	-
chr1	173630863	173630864	Ifi209_1	+
chr1	173673674	173673675	Ifi208_1	+
chr1	173766948	173766949	Ifi204_1	-
chr1	173880186	173880187	Mndal_1	-
chr1	173912913	173912914	Ifi211_1	-
chr1	173913036	173913037	Ifi211_2	-
chr1	173942178	173942179	Ifi203_2	-
chr1	173942453	173942454	Ifi203_1	-
chr1	173942761	173942762	Ifi203_3	-
chr1	175625592	175625593	Fh1_1	-
chr1	175692631	175692632	Opn3_1	-
chr1	175880797	175880798	Exo1_1	+
chr1	176814575	176814576	Sdccag8_2	+
chr1	176814878	176814879	Sdccag8_1	+
chr1	177796489	177796490	Adss_1	-
chr1	178187697	178187698	Desi2_1	+
chr1	178319154	178319155	Cox20_1	+
chr1	178337784	178337785	Hnrnpu_1	-
chr1	178406088	178406089	Efcab2_1	+
chr1	179518012	179518013	Smyd3_1	-
chr1	179546253	179546254	Tfb2m_1	-
chr1	179546509	179546510	Cnst_1	+
chr1	179803674	179803675	Ahctf1_1	-
chr1	180256250	180256251	Psen2_1	-
chr1	180330526	180330527	Itpkb_1	+
chr1	180726053	180726054	Acbd3_1	+
chr1	180813560	180813561	H3f3a_1	-
chr1	180851165	180851166	Sde2_1	+
chr1	180904292	180904293	Pycr2_1	+
chr1	180942459	180942460	Tmem63a_1	+
chr1	181144156	181144157	Nvl_1	-
chr1	181211951	181211952	Wdr26_1	-
chr1	181842351	181842352	Lbr_1	-
chr1	182124788	182124789	Srp9_1	+
chr1	182282771	182282772	Degs1_1	-
chr1	182341599	182341600	Fbxo28_1	-
chr1	182409171	182409172	Trp53bp2_1	+
chr1	182517456	182517457	Capn2_1	-
chr1	183297007	183297008	Brox_1	-
chr1	183297059	183297060	Aida_1	+
chr1	183297283	183297284	Brox_2	-
chr1	183297331	183297332	Aida_2	+
chr1	183369552	183369553	Mia3_1	-
chr1	183388984	183388985	Taf1a_1	+
chr1	184034015	184034016	1700056E22Rik_1	-
chr1	184034459	184034460	Dusp10_1	+
chr1	184732165	184732166	Hlx_2	-
chr1	184732539	184732540	Hlx_1	-
chr1	184845846	184845847	Marc2_1	-
chr1	185204138	185204139	Rab3gap2_1	+
chr1	185329377	185329378	Iars2_1	-
chr1	185332179	185332180	Bpnt1_1	+
chr1	185363083	185363084	Eprs_1	+
chr1	186749324	186749325	Rrp15_1	-
chr1	186749397	186749398	KY467529_1	+
chr1	187215521	187215522	Gpatch2_1	+
chr1	190928539	190928540	Angel2_1	+
chr1	190928849	190928850	Angel2_2	+
chr1	191062903	191062904	Tatdn3_1	-
chr1	191063022	191063023	Nsl1_1	+
chr1	191183251	191183252	Atf3_1	-
chr1	191224452	191224453	D730003I15Rik_1	+
chr1	191318107	191318108	Nenf_1	-
chr1	191325964	191325965	Tmem206_1	+
chr1	191397032	191397033	Ppp2r5a_1	-
chr1	191575511	191575512	Dtl_1	-
chr1	191575572	191575573	Ints7_1	+
chr1	191906814	191906815	Slc30a1_1	+
chr1	191907595	191907596	1700034H15Rik_1	-
chr1	192092548	192092549	Traf5_1	-
chr1	192771237	192771238	Hhat_1	-
chr1	193130235	193130236	Diexf_1	-
chr1	193173584	193173585	A130010J15Rik_1	+
chr1	193201472	193201473	Traf3ip3_1	-
chr1	193203038	193203039	KY467532_1	+
chr1	193207717	193207718	AK005414_1	+
chr1	193264036	193264037	Hsd11b1_2	-
chr1	193273108	193273109	G0s2_1	-
chr1	195092247	195092248	Cd46_1	-
chr1	195131346	195131347	Cr1l_2	-
chr1	195131559	195131560	Cr1l_1	-
chr2	3284276	3284277	Nmt2_1	+
chr2	3332627	3332628	Rpp38_1	-
chr2	3419040	3419041	Meig1_1	-
chr2	3424164	3424165	Dclre1c_1	+
chr2	3512774	3512775	Hspa14_1	-
chr2	3513053	3513054	Cdnf_1	+
chr2	3713492	3713493	Fam107b_1	+
chr2	4559801	4559802	Frmd4a_1	+
chr2	4560139	4560140	Frmd4a_3	+
chr2	4652105	4652106	Prpf18_1	-
chr2	4881763	4881764	Sephs1_2	+
chr2	4882224	4882225	Sephs1_1	+
chr2	4919052	4919053	Phyh_1	+
chr2	5844957	5844958	Cdc123_1	-
chr2	5845029	5845030	Nudt5_2	+
chr2	5845252	5845253	Nudt5_1	+
chr2	5895333	5895334	Sec61a2_1	-
chr2	5951498	5951499	Upf2_1	+
chr2	6721614	6721615	Celf2_1	-
chr2	9877884	9877885	Gata3_2	-
chr2	9878589	9878590	Gata3_1	-
chr2	10048593	10048594	Taf3_1	-
chr2	10080431	10080432	Atp5c1_1	-
chr2	10080585	10080586	Kin_1	+
chr2	10153584	10153585	Itih5_1	+
chr2	11172403	11172404	Prkcq_1	+
chr2	11193334	11193335	Prkcq_2	+
chr2	11339492	11339493	Gm13293_1	+
chr2	11553902	11553903	Pfkfb3_2	-
chr2	11705368	11705369	Il15ra_1	+
chr2	11705758	11705759	Il15ra_2	+
chr2	11777548	11777549	Fbxo18_1	-
chr2	11777771	11777772	Ankrd16_1	+
chr2	11778568	11778569	Ankrd16_2	+
chr2	12419436	12419437	Mindy3_1	-
chr2	13271304	13271305	Rsu1_1	-
chr2	13544663	13544664	Trdmt1_1	-
chr2	13574310	13574311	Vim_1	+
chr2	14073856	14073857	Stamos_1	-
chr2	14074100	14074101	Stam_1	+
chr2	15049272	15049273	Nsun6_1	-
chr2	15055321	15055322	Arl5b_1	+
chr2	18057868	18057869	Mir7655_1	+
chr2	18064584	18064585	Mllt10_1	+
chr2	18392784	18392785	Dnajc1_2	-
chr2	18672461	18672462	Commd3_1	+
chr2	18677017	18677018	Bmi1_1	+
chr2	18677424	18677425	Bmi1_2	+
chr2	18998109	18998110	Pip4k2a_1	-
chr2	18998371	18998372	4930426L09Rik_1	+
chr2	19371649	19371650	Msrb2_1	+
chr2	19658065	19658066	Otud1_1	+
chr2	20967730	20967731	Arhgap21_1	-
chr2	21205360	21205361	Enkur_1	-
chr2	21205736	21205737	Thnsl1_1	+
chr2	22774380	22774381	Apbb1ip_1	+
chr2	22895619	22895620	Pdss1_1	+
chr2	23040194	23040195	Abi1_1	-
chr2	23068223	23068224	Acbd5_1	+
chr2	23069071	23069072	Acbd5_2	+
chr2	23069448	23069449	Acbd5_3	+
chr2	23156023	23156024	Mastl_1	-
chr2	23156517	23156518	Yme1l1_1	+
chr2	24367607	24367608	Psd4_2	+
chr2	24386615	24386616	Psd4_1	+
chr2	24935187	24935188	Arrdc1_1	-
chr2	24949774	24949775	Zmynd19_1	+
chr2	24962459	24962460	Dph7_1	+
chr2	24975023	24975024	Mrpl41_1	-
chr2	24976100	24976101	Pnpla7_2	+
chr2	25145395	25145396	AK085201_1	-
chr2	25180756	25180757	Nrarp_1	+
chr2	25196781	25196782	Tor4a_1	-
chr2	25211388	25211389	Nelfb_1	-
chr2	25224656	25224657	Tubb4b_1	-
chr2	25255382	25255383	Ndor1_1	-
chr2	25255456	25255457	Tmem203_1	+
chr2	25272392	25272393	Ssna1_1	-
chr2	25272500	25272501	Anapc2_1	+
chr2	25332575	25332576	AA543186_1	-
chr2	25332755	25332756	Man1b1_1	+
chr2	25423241	25423242	Fut7_1	+
chr2	25423906	25423907	Fut7_2	+
chr2	25428672	25428673	Abca2_1	+
chr2	25461033	25461034	Paxx_1	-
chr2	25500266	25500267	C8g_1	-
chr2	25500838	25500839	Fbxw5_1	+
chr2	25546887	25546888	Traf2_1	-
chr2	25557902	25557903	Edf1_1	+
chr2	25574870	25574871	Phpt1_1	-
chr2	26021739	26021740	Ubac1_1	-
chr2	26140514	26140515	Tmem250-ps_1	-
chr2	26315531	26315532	Gpsm1_1	+
chr2	26352089	26352090	Dnlz_1	-
chr2	26389305	26389306	Sdccag3_1	-
chr2	26389347	26389348	Pmpca_1	+
chr2	26409200	26409201	Inpp5e_1	-
chr2	26445191	26445192	Sec16a_1	-
chr2	26446027	26446028	0610009E02Rik_1	+
chr2	26503823	26503824	Notch1_1	-
chr2	26604241	26604242	Agpat2_1	-
chr2	26640243	26640244	Snhg7_1	-
chr2	26902813	26902814	Surf6_1	-
chr2	26910544	26910545	Med22_1	-
chr2	26910805	26910806	Rpl7a_1	+
chr2	26916347	26916348	Surf1_1	-
chr2	26916407	26916408	Surf2_1	+
chr2	26933424	26933425	Surf4_1	-
chr2	26934065	26934066	Stkld1_1	+
chr2	26964313	26964314	Rexo4_1	-
chr2	27009949	27009950	Cacfd1_1	+
chr2	27027958	27027959	Slc2a6_1	-
chr2	27475630	27475631	Brd3_1	-
chr2	27515204	27515205	Wdr5_1	+
chr2	27540425	27540426	BC050122_1	+
chr2	28582988	28582989	Gtf3c5_1	-
chr2	28583265	28583266	Gtf3c5_2	-
chr2	28641249	28641250	Tsc1_1	+
chr2	28699650	28699651	Spaca9_1	-
chr2	28700163	28700164	Ak8_1	+
chr2	28840314	28840315	Gtf3c4_1	-
chr2	28840413	28840414	Ddx31_1	+
chr2	28840771	28840772	Ddx31_2	+
chr2	29055065	29055066	Cfap77_1	-
chr2	29060265	29060266	Ttf1_1	+
chr2	29124994	29124995	Setx_1	+
chr2	29125155	29125156	Setx_2	+
chr2	29252060	29252061	6530402F18Rik_1	-
chr2	29619743	29619744	Rapgef1_1	+
chr2	29787651	29787652	Trub2_1	-
chr2	29788266	29788267	Coq4_1	+
chr2	29827384	29827385	Urm1_1	+
chr2	29869518	29869519	Cercam_1	+
chr2	29889819	29889820	Odf2_1	+
chr2	29890074	29890075	Odf2_2	+
chr2	29935455	29935456	Gle1_1	+
chr2	29965679	29965680	Sptan1_1	+
chr2	30048843	30048844	Wdr34_1	-
chr2	30062098	30062099	Set_2	+
chr2	30066522	30066523	Set_1	+
chr2	30093623	30093624	Zdhhc12_1	-
chr2	30124562	30124563	Zer1_1	-
chr2	30133857	30133858	Tbc1d13_1	+
chr2	30171512	30171513	Endog_1	+
chr2	30286322	30286323	Dolk_1	-
chr2	30286426	30286427	Nup188_1	+
chr2	30364253	30364254	Miga2_1	+
chr2	30392415	30392416	Dolpp1_1	+
chr2	30415520	30415521	Crat_2	-
chr2	30415770	30415771	Crat_1	-
chr2	30416040	30416041	Ptpa_1	+
chr2	30595043	30595044	Cstad_1	+
chr2	30807967	30807968	Ntmt1_1	+
chr2	30828266	30828267	Asb6_1	-
chr2	30981911	30981912	BC005624_1	-
chr2	31141956	31141957	Fnbp1_1	-
chr2	31152257	31152258	D330023K18Rik_1	-
chr2	31152332	31152333	Gpr107_1	+
chr2	31572789	31572790	Fubp3_1	+
chr2	31688533	31688534	Abl1_1	+
chr2	31759944	31759945	Abl1_2	+
chr2	31810491	31810492	Qrfp_1	-
chr2	31974463	31974464	Nup214_1	+
chr2	32083227	32083228	Fam78a_3	-
chr2	32083706	32083707	Fam78a_1	-
chr2	32151128	32151129	Prrc2b_1	+
chr2	32236381	32236382	AK076583_1	-
chr2	32236664	32236665	Pomt1_1	+
chr2	32260074	32260075	Uck1_1	-
chr2	32288035	32288036	Swi5_1	-
chr2	32288334	32288335	Golga2_1	+
chr2	32363077	32363078	Ciz1_1	+
chr2	32363236	32363237	Ciz1_2	+
chr2	32363686	32363687	Ciz1_3	+
chr2	32535331	32535332	Fam102a_1	+
chr2	32535732	32535733	Fam102a_2	+
chr2	32570877	32570878	Dpm2_1	+
chr2	32587087	32587088	St6galnac4_1	+
chr2	32694131	32694132	Fpgs_1	-
chr2	32712762	32712763	Cdk9_1	-
chr2	32721115	32721116	Sh2d3c_2	+
chr2	32757290	32757291	Tor2a_1	+
chr2	32775364	32775365	Ttc16_1	-
chr2	32775632	32775633	Ttc16_2	-
chr2	32961713	32961714	Rpl12_1	+
chr2	32963284	32963285	Snora65_1	+
chr2	32982055	32982056	Slc2a8_1	-
chr2	33371477	33371478	Ralgps1_1	-
chr2	33468552	33468553	Zbtb43_1	-
chr2	34371975	34371976	Pbx3_1	-
chr2	34754388	34754389	Gapvd1_1	-
chr2	34772091	34772092	Hspa5_1	+
chr2	34799840	34799841	Rabepk_1	-
chr2	34826216	34826217	Fbxw2_1	-
chr2	34870938	34870939	Psmd5_1	-
chr2	34958165	34958166	Traf1_1	-
chr2	34961606	34961607	Traf1_2	-
chr2	34961825	34961826	Traf1_3	-
chr2	35132219	35132220	Cntrl_2	+
chr2	35200976	35200977	Rab14_1	-
chr2	35461256	35461257	Ggta1_2	-
chr2	35461387	35461388	Ggta1_1	-
chr2	35979580	35979581	Ttll11_1	-
chr2	36136397	36136398	Mrrf_1	+
chr2	36136610	36136611	Rbm18_1	-
chr2	36136641	36136642	Mrrf_2	+
chr2	37422938	37422939	Rc3h2_1	-
chr2	37430880	37430881	Zbtb6_1	-
chr2	37443144	37443145	Zbtb26_1	-
chr2	37443289	37443290	Rabgap1_1	+
chr2	38287187	38287188	Dennd1a_2	-
chr2	38287365	38287366	Dennd1a_1	-
chr2	38643919	38643920	Psmb7_1	-
chr2	38926418	38926419	Nr6a1_1	-
chr2	39005124	39005125	Rpl35_1	-
chr2	39008109	39008110	Arpc5l_1	+
chr2	39065459	39065460	Golga1_1	-
chr2	43748832	43748833	Arhgap15_1	+
chr2	44927222	44927223	Gtdc1_1	-
chr2	45103548	45103549	Zeb2_2	-
chr2	45110347	45110348	Zeb2_3	-
chr2	45111204	45111205	Zeb2os_2	+
chr2	45112297	45112298	Zeb2os_1	+
chr2	45113001	45113002	Zeb2_1	-
chr2	45117365	45117366	Zeb2_4	-
chr2	48949230	48949231	Orc4_1	-
chr2	48949597	48949598	Mbd5_1	+
chr2	49451514	49451515	Epc2_1	+
chr2	50296694	50296695	Mmadhc_1	-
chr2	50296708	50296709	Gm13483_1	+
chr2	51934696	51934697	Rbm43_2	-
chr2	51934976	51934977	Rbm43_1	-
chr2	51973003	51973004	Nmi_1	-
chr2	51973228	51973229	Nmi_2	-
chr2	52424870	52424871	Arl5a_1	-
chr2	52425011	52425012	KY467860_1	+
chr2	52742177	52742178	Stam2_1	-
chr2	53191201	53191202	Prpf40a_1	-
chr2	53192112	53192113	Arl6ip6_1	+
chr2	57114947	57114948	Nr4a2_1	-
chr2	57181736	57181737	BB557941_2	-
chr2	57237701	57237702	Gpd2_2	+
chr2	57238336	57238337	AK050290_1	-
chr2	57238445	57238446	Gpd2_1	+
chr2	57238480	57238481	AK044432_1	-
chr2	58160121	58160122	Cytip_1	-
chr2	60125658	60125659	Baz2b_1	-
chr2	60209832	60209833	AK166079_1	-
chr2	60209925	60209926	March7_1	+
chr2	60383272	60383273	Ly75_1	-
chr2	60881419	60881420	Rbms1_2	-
chr2	61578556	61578557	Tank_2	+
chr2	61593151	61593152	Tank_1	+
chr2	61711756	61711757	Psmd14_1	+
chr2	61711891	61711892	Psmd14_2	+
chr2	62646192	62646193	Ifih1_1	-
chr2	65238487	65238488	Cobll1_1	-
chr2	65238755	65238756	AK007819_1	+
chr2	65239048	65239049	Cobll1_2	-
chr2	68861487	68861488	Cers6_1	+
chr2	69380496	69380497	Dhrs9_1	+
chr2	69722809	69722810	Ppig_1	+
chr2	69723078	69723079	Ppig_3	+
chr2	69723263	69723264	Ppig_2	+
chr2	69789528	69789529	Ccdc173_1	-
chr2	69789658	69789659	Phospho2_1	+
chr2	69790971	69790972	Phospho2_2	+
chr2	69861618	69861619	Ssb_1	+
chr2	69862177	69862178	Ssb_2	+
chr2	69885585	69885586	Mettl5_1	-
chr2	69885703	69885704	AK016085_1	+
chr2	70661627	70661628	Gorasp2_1	+
chr2	70824691	70824692	Tlk1_2	-
chr2	70825413	70825414	Tlk1_1	-
chr2	70965047	70965048	Mettl8_2	-
chr2	71211757	71211758	Dync1i2_1	+
chr2	71211975	71211976	Dync1i2_2	+
chr2	71367553	71367554	Slc25a12_1	-
chr2	71389262	71389263	Hat1_1	+
chr2	71873317	71873318	Pdk1_1	+
chr2	72979025	72979026	Sp3_3	-
chr2	72979280	72979281	Sp3_2	-
chr2	72979469	72979470	Sp3os_1	+
chr2	72980459	72980460	Sp3_1	-
chr2	73312539	73312540	Cir1_1	-
chr2	73312658	73312659	Scrn3_1	+
chr2	73386336	73386337	Gpr155_2	-
chr2	73386457	73386458	Gpr155_1	-
chr2	73386885	73386886	KY467871_1	+
chr2	73453876	73453877	Wipf1_1	-
chr2	73486411	73486412	Wipf1_2	-
chr2	73892627	73892628	Atf2_1	-
chr2	73911299	73911300	Atp5g3_1	-
chr2	74825816	74825817	Mtx2_1	+
chr2	75704503	75704504	Nfe2l2_1	-
chr2	75832176	75832177	Agps_1	+
chr2	75938419	75938420	Ttc30b_1	-
chr2	76673079	76673080	Fkbp7_1	-
chr2	76675301	76675302	Plekha3_1	+
chr2	77946182	77946183	Cwc22_1	-
chr2	78869079	78869080	Ube2e3_1	+
chr2	79255576	79255577	Itga4_1	+
chr2	79370860	79370861	Cerkl_1	-
chr2	80315477	80315478	Dnajc10_2	+
chr2	80315710	80315711	Dnajc10_1	+
chr2	80617224	80617225	Dusp19_1	+
chr2	80638849	80638850	Nup35_1	+
chr2	80639346	80639347	Nup35_2	+
chr2	83644536	83644537	Zc3h15_1	+
chr2	83724492	83724493	Itgav_1	+
chr2	84425265	84425266	Calcrl_1	-
chr2	84670685	84670686	Selenoh_1	-
chr2	84678065	84678066	Tmx2_1	-
chr2	84678424	84678425	Med19_1	+
chr2	84678844	84678845	Tmx2_2	-
chr2	84715066	84715067	Zdhhc5_1	-
chr2	84727286	84727287	Clp1_1	-
chr2	85037187	85037188	Ssrp1_1	+
chr2	85037492	85037493	Ssrp1_2	+
chr2	90580594	90580595	Ptprj_1	-
chr2	90679384	90679385	Nup160_1	+
chr2	90847286	90847287	Mtch2_1	+
chr2	90904665	90904666	Ndufs3_1	-
chr2	90904768	90904769	Kbtbd4_1	+
chr2	90940489	90940490	Celf1_1	+
chr2	91053917	91053918	AK020549_1	-
chr2	91054068	91054069	Psmc3_1	+
chr2	91070223	91070224	Slc39a13_1	-
chr2	91183026	91183027	Madd_2	-
chr2	91183867	91183868	Madd_1	-
chr2	91202918	91202919	Acp2_1	+
chr2	91236972	91236973	Ddb2_1	-
chr2	91237137	91237138	A330069E16Rik_1	+
chr2	91265306	91265307	Arfgap2_1	+
chr2	91526791	91526792	Ckap5_1	+
chr2	91526930	91526931	Ckap5_2	+
chr2	91649774	91649775	Zfp408_1	-
chr2	91650229	91650230	Arhgap1_1	+
chr2	91710536	91710537	Atg13_1	-
chr2	91710920	91710921	Harbi1_1	+
chr2	91730179	91730180	Ambra1_1	+
chr2	91950321	91950322	Dgkz_2	-
chr2	91963638	91963639	Dgkz_1	-
chr2	91965586	91965587	Dgkz_3	-
chr2	92184301	92184302	Phf21a_3	+
chr2	92185481	92185482	Phf21a_1	+
chr2	92374697	92374698	Pex16_1	+
chr2	92375239	92375240	Pex16_2	+
chr2	92375499	92375500	Pex16_3	+
chr2	92434035	92434036	Cry2_1	-
chr2	92459727	92459728	Slc35c1_1	-
chr2	92460481	92460482	Slc35c1_2	-
chr2	93046164	93046165	Prdm11_1	-
chr2	93187592	93187593	Trp53i11_1	+
chr2	93462399	93462400	Cd82_1	-
chr2	94010753	94010754	Alkbh3_1	-
chr2	94157901	94157902	Hsd17b12_1	-
chr2	94406690	94406691	Ttc17_1	-
chr2	94406754	94406755	2810002D19Rik_1	+
chr2	94438131	94438132	Api5_1	-
chr2	101628797	101628798	Rag2_2	+
chr2	101628991	101628992	B230118H07Rik_1	-
chr2	101678428	101678429	Traf6_1	+
chr2	101797683	101797684	Prr5l_1	-
chr2	101886256	101886257	Commd9_1	+
chr2	102400911	102400912	Trim44_1	-
chr2	102901457	102901458	Cd44_1	-
chr2	103485101	103485102	Cat_1	-
chr2	103566311	103566312	Abtb2_1	+
chr2	103761222	103761223	Nat10_1	-
chr2	103797022	103797023	Caprin1_2	-
chr2	103797600	103797601	Caprin1_1	-
chr2	104027859	104027860	Fbxo3_1	+
chr2	104028309	104028310	AK076716_1	-
chr2	104494522	104494523	Hipk3_1	-
chr2	104590499	104590500	Cstf3_1	+
chr2	104849767	104849768	Prrg4_1	-
chr2	105017044	105017045	Eif3m_1	-
chr2	105017120	105017121	AK019067_1	+
chr2	105399235	105399236	Rcn1_1	-
chr2	105904504	105904505	Elp4_1	-
chr2	105904680	105904681	Immp1l_1	+
chr2	106003238	106003239	Dnajc24_1	-
chr2	106003333	106003334	BC048594_1	+
chr2	106974396	106974397	Arl14ep_1	-
chr2	109278279	109278280	Mettl15_1	-
chr2	109280725	109280726	Mettl15_2	-
chr2	109280819	109280820	Kif18a_1	+
chr2	109890859	109890860	Lin7c_1	+
chr2	112239829	112239830	Lpcat4_1	+
chr2	112261966	112261967	Nop10_1	+
chr2	112367977	112367978	Emc4_1	-
chr2	112455051	112455052	Emc7_1	+
chr2	112492955	112492956	Aven_1	+
chr2	113829028	113829029	Scg5_1	-
chr2	113848711	113848712	Arhgap11a_1	-
chr2	114175306	114175307	Aqr_1	-
chr2	114654927	114654928	Dph6_1	-
chr2	115581693	115581694	BC052040_1	+
chr2	117121094	117121095	Spred1_1	+
chr2	117249738	117249739	Fam98b_1	+
chr2	117342875	117342876	Rasgrp1_1	-
chr2	118388661	118388662	Eif2ak4_1	+
chr2	118479643	118479644	Srp14_1	-
chr2	118549638	118549639	Bmf_1	-
chr2	118728390	118728391	Plcb2_1	-
chr2	118745785	118745786	Inafm2_1	+
chr2	118926529	118926530	Chst14_1	+
chr2	119029365	119029366	Ccdc32_1	-
chr2	119034802	119034803	Rpusd2_1	+
chr2	119047146	119047147	Knl1_1	+
chr2	119112854	119112855	Rad51_1	+
chr2	119156958	119156959	Rmdn3_1	-
chr2	119208632	119208633	Zfyve19_2	+
chr2	119208794	119208795	Dnajc17_1	-
chr2	119209012	119209013	Zfyve19_1	+
chr2	119288757	119288758	Vps18_1	+
chr2	119477629	119477630	Ino80_1	-
chr2	119547792	119547793	Chp1_1	+
chr2	119594326	119594327	1700020I14Rik_1	+
chr2	119618488	119618489	Oip5_1	-
chr2	119618728	119618729	Nusap1_1	+
chr2	119662797	119662798	Ndufaf1_1	-
chr2	119675083	119675084	Rtf1_1	+
chr2	119787518	119787519	Rpap1_1	-
chr2	119897284	119897285	Mga_1	+
chr2	119898436	119898437	Mga_3	+
chr2	119972734	119972735	Mapkbp1_1	+
chr2	120027495	120027496	Jmjd7_1	+
chr2	120154520	120154521	Ehd4_1	-
chr2	120353120	120353121	Vps39_1	-
chr2	120404077	120404078	Tmem87a_1	-
chr2	120404730	120404731	Ganc_2	+
chr2	120563830	120563831	Zfp106_1	-
chr2	120567713	120567714	Snap23_1	+
chr2	120731523	120731524	Cdan1_1	-
chr2	120970613	120970614	Ubr1_2	-
chr2	120970745	120970746	Ubr1_1	-
chr2	120977012	120977013	Tmem62_1	+
chr2	121008443	121008444	Ccndbp1_1	+
chr2	121140377	121140378	Lcmt2_2	-
chr2	121140429	121140430	Adal_1	+
chr2	121140663	121140664	Lcmt2_1	-
chr2	121171124	121171125	Zscan29_1	-
chr2	121171239	121171240	Tubgcp4_1	+
chr2	121271378	121271379	Trp53bp1_1	-
chr2	121355075	121355076	Ppip5k1_1	-
chr2	121413797	121413798	Catsper2_1	-
chr2	121413949	121413950	Pdia3_1	+
chr2	122028650	122028651	Eif3j1_1	+
chr2	122118335	122118336	Spg11_1	-
chr2	122147685	122147686	B2m_1	+
chr2	122151113	122151114	Patl2_1	-
chr2	122234810	122234811	Sord_1	+
chr2	122368858	122368859	Shf_1	-
chr2	122630645	122630646	Spata5l1_1	+
chr2	122738352	122738353	AK016335_1	-
chr2	122738561	122738562	Bloc1s6_1	+
chr2	125123581	125123582	Myef2_1	-
chr2	125247247	125247248	Dut_2	+
chr2	125247716	125247717	Dut_1	+
chr2	125673167	125673168	Eid1_1	+
chr2	125782756	125782757	Secisbp2l_1	-
chr2	125858995	125858996	Cops2_1	-
chr2	125866259	125866260	Galk2_1	+
chr2	126151986	126151987	Fam227b_1	-
chr2	126152184	126152185	Dtwd1_1	+
chr2	126491572	126491573	Atp8b4_1	-
chr2	126500654	126500655	Atp8b4_2	-
chr2	126675501	126675502	Gabpb1_1	-
chr2	126676084	126676085	Gabpb1_2	-
chr2	126707382	126707383	Usp8_1	+
chr2	126876164	126876165	Trpm7_1	-
chr2	126933034	126933035	Sppl2a_1	-
chr2	126933331	126933332	Sppl2a_2	-
chr2	127008731	127008732	Ap4e1_1	+
chr2	127070692	127070693	Blvra_1	+
chr2	127133933	127133934	Ncaph_1	-
chr2	127143431	127143432	Itpripl1_1	-
chr2	127208261	127208262	1810024B03Rik_1	-
chr2	127208398	127208399	Snrnp200_1	+
chr2	127247741	127247742	Ciao1_1	-
chr2	127247957	127247958	Tmem127_1	+
chr2	127270228	127270229	Stard7_1	+
chr2	127336159	127336160	Dusp2_1	+
chr2	127587410	127587411	Mrps5_1	+
chr2	127788890	127788891	Nphp1_1	-
chr2	128126037	128126038	Bcl2l11_1	+
chr2	128128130	128128131	Bcl2l11_2	+
chr2	128429253	128429254	Gm14005_1	-
chr2	128687371	128687372	Anapc1_1	-
chr2	128818317	128818318	Tmem87b_1	+
chr2	128943965	128943966	Zc3h8_1	-
chr2	128967391	128967392	Zc3h6_1	+
chr2	129101026	129101027	Polr1b_1	+
chr2	129129815	129129816	Chchd5_1	+
chr2	129180645	129180646	AI847159_1	-
chr2	129198800	129198801	Slc20a1_1	+
chr2	129297186	129297187	Ckap2l_1	-
chr2	129297369	129297370	Gm14023_1	+
chr2	130179365	130179366	Snrpb_1	-
chr2	130274445	130274446	Nop56_1	+
chr2	130284427	130284428	Idh3b_1	-
chr2	130424277	130424278	Pced1a_1	-
chr2	130424362	130424363	Vps16_1	+
chr2	130450281	130450282	Ptpra_1	+
chr2	130563721	130563722	4930473A02Rik_1	-
chr2	130563741	130563742	Mrps26_1	+
chr2	130630001	130630002	Ubox5_1	-
chr2	130664619	130664620	Ddrgk1_1	-
chr2	130667843	130667844	Itpa_1	+
chr2	130906377	130906378	A730017L22Rik_1	-
chr2	130906523	130906524	Atrn_1	+
chr2	131160043	131160044	1700037H04Rik_1	-
chr2	131186991	131186992	Cdc25b_1	+
chr2	131210401	131210402	Ap5s1_1	+
chr2	131210543	131210544	Ap5s1_2	+
chr2	131234066	131234067	Mavs_1	+
chr2	131262494	131262495	Pank2_1	+
chr2	131352845	131352846	Rnf24_1	-
chr2	131491904	131491905	Smox_1	+
chr2	131510205	131510206	Smox_2	+
chr2	132021160	132021161	Rassf2_2	-
chr2	132247628	132247629	Tmem230_2	-
chr2	132247755	132247756	Tmem230_1	-
chr2	132253179	132253180	Pcna_1	-
chr2	132253357	132253358	KY467898_1	+
chr2	132263199	132263200	Cds2_2	+
chr2	132263303	132263304	Cds2_1	+
chr2	132578211	132578212	Gpcpd1_1	-
chr2	132686950	132686951	1110034G24Rik_1	+
chr2	132816004	132816005	Trmt6_1	-
chr2	132816162	132816163	Mcm8_1	+
chr2	134644133	134644134	Tmx4_1	-
chr2	135659551	135659552	Plcb4_1	+
chr2	136891166	136891167	Mkks_2	-
chr2	136891405	136891406	Mkks_1	-
chr2	136891606	136891607	Slx4ip_2	+
chr2	136892214	136892215	Slx4ip_1	+
chr2	140042159	140042160	Tasp1_2	-
chr2	140066781	140066782	Tasp1_1	-
chr2	140170550	140170551	Esf1_1	-
chr2	140170665	140170666	Ndufaf5_1	+
chr2	140171031	140171032	Ndufaf5_2	+
chr2	142901445	142901446	Kif16b_1	-
chr2	142902970	142902971	Kif16bos_1	+
chr2	143915548	143915549	Dstn_1	+
chr2	144011209	144011210	Rrbp1_1	-
chr2	144266212	144266213	Snord17_1	-
chr2	144270477	144270478	Snx5_2	-
chr2	144270792	144270793	Snx5_1	-
chr2	144270901	144270902	Mgme1_1	+
chr2	144368976	144368977	Kat14_1	+
chr2	144527401	144527402	Dzank1_1	-
chr2	144527758	144527759	Polr3f_1	+
chr2	144556281	144556282	Sec23b_1	+
chr2	144600015	144600016	Dtd1_1	+
chr2	145934695	145934696	Crnkl1_1	-
chr2	145934783	145934784	Cfap61_1	+
chr2	146512037	146512038	Ralgapa2_1	-
chr2	146855882	146855883	Kiz_1	+
chr2	148672648	148672649	Nxt1_1	+
chr2	148681163	148681164	Gzf1_1	+
chr2	150136665	150136666	Zfp120_1	-
chr2	150362729	150362730	3300002I08Rik_1	-
chr2	150570470	150570471	Cst7_1	+
chr2	150608543	150608544	Apmap_1	-
chr2	150667419	150667420	E130215H24Rik_1	+
chr2	150668213	150668214	Acss1_1	-
chr2	150786783	150786784	Pygb_1	+
chr2	150904662	150904663	Abhd12_1	-
chr2	150909588	150909589	Gins1_1	+
chr2	151542587	151542588	Fkbp1a_1	+
chr2	151575419	151575420	Sdcbp2_2	+
chr2	151741264	151741265	Psmf1_1	-
chr2	151996550	151996551	Slc52a3_1	+
chr2	152105448	152105449	Srxn1_1	+
chr2	152293875	152293876	Tbc1d20_1	+
chr2	152332409	152332410	Rbck1_1	-
chr2	152332651	152332652	Rbck1_2	-
chr2	152830486	152830487	Bcl2l1_1	-
chr2	152831702	152831703	Bcl2l1_2	-
chr2	153015388	153015389	Pdrg1_1	-
chr2	153161332	153161333	Tm9sf4_2	+
chr2	153161544	153161545	Tm9sf4_1	+
chr2	153225382	153225383	Tspyl3_1	-
chr2	153241372	153241373	Plagl2_1	-
chr2	153241530	153241531	Pofut1_1	+
chr2	153291435	153291436	Kif3b_1	+
chr2	153345791	153345792	2500004C02Rik_1	-
chr2	153346131	153346132	Asxl1_1	+
chr2	153632688	153632689	Commd7_1	-
chr2	153741342	153741343	Mapre1_1	+
chr2	154372718	154372719	Cdk5rap1_1	-
chr2	154603671	154603672	Pxmp4_1	-
chr2	154613348	154613349	Zfp341_1	+
chr2	154613388	154613389	AK145231_1	-
chr2	154657046	154657047	Chmp4b_1	+
chr2	154791050	154791051	Raly_2	+
chr2	154791351	154791352	Raly_1	+
chr2	154892830	154892831	Eif2s2_1	-
chr2	155074455	155074456	Ahcy_1	-
chr2	155133508	155133509	Itch_1	+
chr2	155276454	155276455	Map1lc3a_1	+
chr2	155357401	155357402	Pigu_1	-
chr2	155381839	155381840	Trp53inp2_1	+
chr2	155518065	155518066	Acss2_1	+
chr2	155592729	155592730	Gss_1	-
chr2	155692331	155692332	Trpc4ap_1	-
chr2	155729409	155729410	Edem2_1	-
chr2	155819206	155819207	BC029722_1	-
chr2	155826674	155826675	Eif6_1	-
chr2	155956566	155956567	Cep250_1	+
chr2	155979609	155979610	Cep250_2	+
chr2	156111921	156111922	Rbm12_1	-
chr2	156144185	156144186	Nfs1_1	-
chr2	156144218	156144219	Romo1_1	+
chr2	156180185	156180186	Rbm39_1	-
chr2	156312466	156312467	Cnbd2_1	+
chr2	156312533	156312534	Scand1_1	-
chr2	156392960	156392961	2900097C17Rik_1	-
chr2	156547596	156547597	Aar2_1	+
chr2	156721044	156721045	Dlgap4_1	+
chr2	156862931	156862932	5430405H02Rik_1	-
chr2	156863155	156863156	1110008F13Rik_1	+
chr2	157007074	157007075	Dsn1_1	-
chr2	157135092	157135093	Samhd1_1	-
chr2	157135208	157135209	Samhd1_2	-
chr2	157204525	157204526	Rbl1_1	-
chr2	157279005	157279006	Rpn2_2	+
chr2	157279310	157279311	Rpn2_1	+
chr2	157279532	157279533	Mroh8_1	-
chr2	157367608	157367609	Manbal_1	+
chr2	158028429	158028430	Tti1_1	-
chr2	158028499	158028500	Rprd1b_1	+
chr2	158361521	158361522	Snhg17_1	-
chr2	158409881	158409882	Ralgapb_1	+
chr2	158624921	158624922	Actr5_1	+
chr2	158666717	158666718	Ppp1r16b_2	+
chr2	158667166	158667167	Ppp1r16b_1	+
chr2	160645980	160645981	Top1_1	+
chr2	160872595	160872596	Zhx3_2	-
chr2	160872997	160872998	Zhx3_1	-
chr2	162931527	162931528	Srsf6_1	+
chr2	163017467	163017468	Ift52_1	+
chr2	163419483	163419484	Oser1_1	-
chr2	163602348	163602349	Ttpal_1	+
chr2	163995161	163995162	Ywhab_1	+
chr2	164071101	164071102	Tomm34_1	-
chr2	164461006	164461007	Sys1_1	+
chr2	164486539	164486540	Dbndd2_1	+
chr2	164497542	164497543	Pigt_1	+
chr2	164746003	164746004	Dnttip1_1	+
chr2	164804830	164804831	Acot8_1	-
chr2	164805100	164805101	Zswim3_1	+
chr2	164823012	164823013	Zswim1_1	+
chr2	164832908	164832909	Ctsa_2	+
chr2	164833452	164833453	Neurl2_1	-
chr2	164833805	164833806	Ctsa_1	+
chr2	164879382	164879383	Pcif1_1	+
chr2	164911433	164911434	AK141411_1	+
chr2	164911784	164911785	Zfp335_1	-
chr2	165234669	165234670	Cdh22_1	-
chr2	165326468	165326469	Elmo2_1	-
chr2	165655345	165655346	Eya2_2	+
chr2	165992659	165992660	Ncoa3_1	+
chr2	166155280	166155281	Sulf2_2	-
chr2	166155553	166155554	Sulf2_3	-
chr2	166155655	166155656	Sulf2_1	-
chr2	166447519	166447520	5031425F14Rik_1	+
chr2	166713764	166713765	Prex1_1	-
chr2	166906055	166906056	Cse1l_1	+
chr2	166996238	166996239	Stau1_1	-
chr2	167015299	167015300	Ddx27_1	+
chr2	167062638	167062639	Znfx1_1	-
chr2	167063221	167063222	Zfas1_1	+
chr2	167101576	167101577	BC054394_1	-
chr2	167349175	167349176	B4galt5_1	-
chr2	167492873	167492874	Spata2_1	-
chr2	167503442	167503443	Rnf114_1	+
chr2	167538201	167538202	Snai1_1	+
chr2	167631982	167631983	Ube2v1_1	-
chr2	167661526	167661527	Tmem189_1	-
chr2	167777490	167777491	KY467917_1	+
chr2	167932371	167932372	Ptpn1_1	+
chr2	167944550	167944551	Ptpn1_2	+
chr2	168207127	168207128	Adnp_1	-
chr2	168229848	168229849	Gm20716_2	-
chr2	168230361	168230362	Gm20716_1	-
chr2	168230621	168230622	Mocs3_1	+
chr2	168590364	168590365	Nfatc2_1	-
chr2	170131176	170131177	Zfp217_1	-
chr2	170511437	170511438	Pfdn4_1	+
chr2	172345634	172345635	Fam210b_1	+
chr2	172370520	172370521	Aurka_1	-
chr2	172370976	172370977	Cstf1_1	+
chr2	172440581	172440582	Rtf2_1	+
chr2	173000171	173000172	Rae1_1	+
chr2	173000337	173000338	Rae1_2	+
chr2	173021928	173021929	Rbm38_1	+
chr2	173218896	173218897	Zbp1_1	-
chr2	173659844	173659845	Rab22a_1	+
chr2	173737584	173737585	Vapb_1	+
chr2	174076317	174076318	Stx16_1	+
chr2	174330118	174330119	Gnas_1	+
chr2	174415832	174415833	Nelfcd_1	+
chr2	174472906	174472907	Prelid3b_1	-
chr2	179976656	179976657	Taf4_1	-
chr2	179976881	179976882	4921531C22Rik_1	+
chr2	180119341	180119342	Osbpl2_1	+
chr2	180257416	180257417	Rps21_1	+
chr2	180273464	180273465	Cables2_1	-
chr2	180456333	180456334	Slco4a1_1	+
chr2	180582757	180582758	Mrgbp_1	+
chr2	180589441	180589442	Ogfr_1	+
chr2	180702011	180702012	Dido1_2	-
chr2	180709997	180709998	Dido1_1	-
chr2	180710264	180710265	Gid8_1	+
chr2	180967238	180967239	Arfgap1_1	+
chr2	181220036	181220037	Fndc11_1	+
chr2	181241991	181241992	Helz2_1	-
chr2	181319738	181319739	Rtel1_1	+
chr2	181365350	181365351	Arfrp1_1	-
chr2	181365424	181365425	Zgpat_1	+
chr2	181381342	181381343	Lime1_1	+
chr2	181497200	181497201	Tpd52l2_1	+
chr2	181520550	181520551	Dnajc5_1	+
chr2	181581981	181581982	Uckl1_1	-
chr2	181592445	181592446	Zfp512b_1	-
chr2	181599160	181599161	Samd10_1	-
chr2	181601376	181601377	Prpf6_1	+
chr2	181680291	181680292	Tcea2_1	+
chr2	181693621	181693622	Rgs19_2	-
chr2	181693948	181693949	Rgs19_1	-
chr2	181837899	181837900	Pcmtd2_1	+
chr2	181864428	181864429	Polr3k_1	+
chr3	5576143	5576144	Pex2_1	-
chr3	8666969	8666970	Hey1_1	-
chr3	8923813	8923814	Mrps28_1	-
chr3	9004484	9004485	Tpd52_1	-
chr3	9250563	9250564	Zbtb10_1	+
chr3	9403063	9403064	C030034L19Rik_1	+
chr3	9833629	9833630	Pag1_1	-
chr3	10331371	10331372	Impa1_1	-
chr3	10351313	10351314	Zfand1_1	-
chr3	10440101	10440102	Snx16_1	-
chr3	14578662	14578663	E2f5_1	+
chr3	14578794	14578795	E2f5_2	+
chr3	14611266	14611267	1810022K09Rik_1	-
chr3	14886443	14886444	Car2_2	+
chr3	14886690	14886691	Car2_1	+
chr3	16183256	16183257	Ythdf3_1	+
chr3	19163045	19163046	Armc1_1	-
chr3	19311366	19311367	Pde7a_1	-
chr3	19894876	19894877	4632415L05Rik_1	+
chr3	20035301	20035302	Hps3_1	-
chr3	20057818	20057819	Hltf_1	+
chr3	20058345	20058346	Hltf_2	+
chr3	20155063	20155064	Gyg_1	-
chr3	22076668	22076669	Tbl1xr1_2	+
chr3	22076787	22076788	Tbl1xr1_1	+
chr3	27153821	27153822	Ect2_1	-
chr3	27153924	27153925	Ect2_2	-
chr3	27154054	27154055	1700125G22Rik_1	+
chr3	27938660	27938661	Pld1_1	+
chr3	28263379	28263380	Tnik_1	+
chr3	28805350	28805351	AK046440_1	-
chr3	28805510	28805511	Rpl22l1_1	+
chr3	30599869	30599870	Actrt3_1	-
chr3	30602067	30602068	Mynn_1	+
chr3	30602638	30602639	Mynn_2	+
chr3	30793327	30793328	Sec62_1	+
chr3	30855992	30855993	Gpr160_1	+
chr3	30969404	30969405	Phc3_1	-
chr3	31095109	31095110	Skil_1	+
chr3	32365661	32365662	Zmat3_1	-
chr3	32510549	32510550	Zfp639_1	+
chr3	32529480	32529481	Mfn1_1	+
chr3	32708695	32708696	Actl6a_1	+
chr3	32736747	32736748	Mrpl47_1	-
chr3	32737061	32737062	Ndufb5_1	+
chr3	32737075	32737076	AK165361_1	+
chr3	33800208	33800209	Ttc14_1	+
chr3	35754127	35754128	Atp11b_1	+
chr3	35932837	35932838	Dcun1d1_2	-
chr3	35933059	35933060	Dcun1d1_1	-
chr3	36000667	36000668	Mccc1_1	-
chr3	36066081	36066082	Acad9_1	+
chr3	36475664	36475665	Anxa5_1	-
chr3	36475948	36475949	1810062G17Rik_1	+
chr3	36552618	36552619	Exosc9_1	+
chr3	36571959	36571960	Ccna2_1	-
chr3	36863123	36863124	4932438A13Rik_1	+
chr3	37312440	37312441	Cetn4_1	-
chr3	37312555	37312556	Bbs12_1	+
chr3	37419588	37419589	Nudt6_1	-
chr3	37419966	37419967	Spata5_2	+
chr3	37420316	37420317	Spata5_1	+
chr3	38484844	38484845	Ankrd50_1	-
chr3	40745606	40745607	Hspa4l_1	+
chr3	40800027	40800028	Plk4_1	+
chr3	40800780	40800781	Plk4_2	+
chr3	40846854	40846855	Mfsd8_1	-
chr3	40894039	40894040	AK078307_1	-
chr3	40894245	40894246	Abhd18_1	+
chr3	40950785	40950786	Larp1b_1	+
chr3	41083007	41083008	Pgrmc2_1	-
chr3	41742503	41742504	Sclt1_1	-
chr3	41742654	41742655	D3Ertd751e_1	+
chr3	51224469	51224470	Noct_2	+
chr3	51224932	51224933	Noct_1	+
chr3	51276853	51276854	4930577N17Rik_1	+
chr3	51277425	51277426	Elf2_2	-
chr3	51340643	51340644	Elf2_1	-
chr3	51408937	51408938	Ndufc1_1	-
chr3	51416027	51416028	Naa15_1	+
chr3	51483952	51483953	Rab33b_1	+
chr3	51484283	51484284	Rab33b_2	+
chr3	51559774	51559775	5031434O11Rik_1	+
chr3	51560626	51560627	Setd7_1	-
chr3	51560822	51560823	Setd7_2	-
chr3	51661176	51661177	Mgst2_1	+
chr3	52104990	52104991	Maml3_1	-
chr3	52268417	52268418	Foxo1_1	+
chr3	53017218	53017219	Cog6_1	-
chr3	53463244	53463245	Nhlrc3_1	-
chr3	53463794	53463795	Proser1_1	+
chr3	53863802	53863803	Ufm1_1	-
chr3	54692857	54692858	Supt20_1	+
chr3	54693093	54693094	Supt20_2	+
chr3	54735045	54735046	Exosc8_1	-
chr3	54735558	54735559	Alg5_1	+
chr3	54807790	54807791	Rfxap_1	-
chr3	57651676	57651677	Commd2_1	-
chr3	57736081	57736082	Rnf13_1	+
chr3	58525752	58525753	Serp1_1	-
chr3	58526042	58526043	Eif2a_1	+
chr3	58576694	58576695	Selenot_1	+
chr3	58692063	58692064	Siah2_2	-
chr3	58692400	58692401	Siah2_1	-
chr3	58692503	58692504	4930593A02Rik_1	+
chr3	59098379	59098380	Gpr171_2	-
chr3	59101817	59101818	Gpr171_1	-
chr3	59130618	59130619	P2ry14_3	-
chr3	59131072	59131073	P2ry14_2	-
chr3	59262843	59262844	P2ry12_1	-
chr3	60473073	60473074	Mbnl1_2	+
chr3	60501264	60501265	Mbnl1_1	+
chr3	60528748	60528749	Mbnl1_3	+
chr3	61364384	61364385	AK046664_1	-
chr3	61364615	61364616	Rap2b_1	+
chr3	62506987	62506988	Dhx36_1	-
chr3	63929384	63929385	E130311K13Rik_1	-
chr3	63964584	63964585	Slc33a1_1	-
chr3	63976174	63976175	Gmps_1	+
chr3	65392552	65392553	Ssr3_1	-
chr3	65528214	65528215	AK161073_1	-
chr3	65528446	65528447	Tiparp_1	+
chr3	65529326	65529327	4931440P22Rik_1	-
chr3	65659230	65659231	Mir8120_1	+
chr3	65666245	65666246	Lekr1_1	+
chr3	65957660	65957661	AK044348_1	+
chr3	65958180	65958181	Ccnl1_1	-
chr3	67582799	67582800	Mfsd1_1	+
chr3	69004512	69004513	AK135399_1	-
chr3	69004512	69004513	Ift80_1	-
chr3	69004995	69004996	Smc4_1	+
chr3	69009984	69009985	Mir16-2_1	+
chr3	69044714	69044715	Trim59_1	-
chr3	69127077	69127078	Kpna4_1	-
chr3	69316929	69316930	Ppm1l_1	+
chr3	69722029	69722030	Nmd3_1	+
chr3	75556808	75556809	Pdcd10_1	-
chr3	75557544	75557545	Serpini1_1	+
chr3	79567777	79567778	Fnip2_1	-
chr3	79591406	79591407	Ppid_1	+
chr3	79628699	79628700	Etfdh_1	-
chr3	79629123	79629124	4930579G24Rik_1	+
chr3	79842650	79842651	Tmem144_1	-
chr3	81932642	81932643	Ctso_1	+
chr3	83055550	83055551	Plrg1_1	+
chr3	84040132	84040133	Tmem131l_1	-
chr3	84582666	84582667	Arfip1_1	-
chr3	84666277	84666278	Tmem154_1	+
chr3	85573924	85573925	AK158189_1	-
chr3	85574126	85574127	Gatb_1	+
chr3	86142592	86142593	Rps3a1_1	-
chr3	86142836	86142837	AK080030_1	+
chr3	86224226	86224227	Lrba_1	+
chr3	86224707	86224708	Lrba_2	+
chr3	86986567	86986568	Cd1d2_1	+
chr3	86999328	86999329	Cd1d1_1	-
chr3	87525613	87525614	Etv3_1	+
chr3	87527426	87527427	Etv3_2	+
chr3	87768942	87768943	Pear1_1	-
chr3	87846759	87846760	Sh2d2a_1	+
chr3	87847013	87847014	Sh2d2a_2	+
chr3	87885580	87885581	Prcc_1	-
chr3	87906399	87906400	Hdgf_1	+
chr3	87919543	87919544	Mrpl24_1	+
chr3	87930143	87930144	Rrnad1_1	-
chr3	87930306	87930307	Isg20l2_1	+
chr3	88043108	88043109	Gpatch4_1	+
chr3	88142355	88142356	Mef2d_1	+
chr3	88145589	88145590	Mef2d_2	+
chr3	88177704	88177705	1700113A16Rik_1	-
chr3	88296901	88296902	Tsacc_1	-
chr3	88297122	88297123	Cct3_1	+
chr3	88325045	88325046	Glmp_1	+
chr3	88336296	88336297	Smg5_1	+
chr3	88410315	88410316	Pmf1_1	-
chr3	88425116	88425117	Slc25a44_1	-
chr3	88454847	88454848	Sema4a_1	-
chr3	88455337	88455338	Sema4a_4	-
chr3	88455699	88455700	Sema4a_2	-
chr3	88503306	88503307	Lmna_1	-
chr3	88552923	88552924	Lamtor2_1	-
chr3	88553774	88553775	Ubqln4_1	+
chr3	88579640	88579641	Ssr2_1	+
chr3	88621158	88621159	Arhgef2_1	+
chr3	88621489	88621490	Arhgef2_4	+
chr3	88685817	88685818	2810403A07Rik_1	+
chr3	88913927	88913928	Msto1_1	-
chr3	88949949	88949950	Dap3_2	-
chr3	88950210	88950211	Dap3_1	-
chr3	88950438	88950439	Ash1l_1	+
chr3	88950686	88950687	Ash1l_2	+
chr3	89089992	89089993	Rusc1_1	-
chr3	89164802	89164803	Clk2_1	+
chr3	89177481	89177482	Scamp3_1	+
chr3	89202927	89202928	Gba_1	+
chr3	89214353	89214354	Mtx1_1	-
chr3	89215204	89215205	Thbs3_1	+
chr3	89229058	89229059	Muc1_1	+
chr3	89245848	89245849	Trim46_2	-
chr3	89246469	89246470	Krtcap2_1	+
chr3	89266578	89266579	Dpm3_1	+
chr3	89270526	89270527	Slc50a1_1	-
chr3	89391842	89391843	Gm15417_2	+
chr3	89392068	89392069	Zbtb7b_2	-
chr3	89393157	89393158	Zbtb7b_1	-
chr3	89394293	89394294	Gm15417_1	+
chr3	89411860	89411861	Flad1_1	-
chr3	89418277	89418278	Cks1b_1	-
chr3	89418667	89418668	Shc1_2	+
chr3	89430423	89430424	Pygo2_1	+
chr3	89430739	89430740	Pygo2_2	+
chr3	89436748	89436749	Pbxip1_1	+
chr3	89459199	89459200	Pmvk_1	+
chr3	89730757	89730758	Adar_2	+
chr3	89773452	89773453	4632404H12Rik_1	-
chr3	89773626	89773627	Ube2q1_1	+
chr3	89963337	89963338	Atp8b2_1	-
chr3	89998676	89998677	Hax1_1	-
chr3	90051542	90051543	4933434E20Rik_2	+
chr3	90052471	90052472	Ubap2l_1	-
chr3	90052927	90052928	4933434E20Rik_1	+
chr3	90079664	90079665	Tpm3_1	+
chr3	90213646	90213647	Rps27_1	-
chr3	90231640	90231641	Jtb_1	+
chr3	90248204	90248205	Slc39a1_1	+
chr3	90248901	90248902	Slc39a1_2	+
chr3	90254301	90254302	Crtc2_1	+
chr3	90266513	90266514	Dennd4b_1	+
chr3	90293192	90293193	Gatad2b_1	+
chr3	90433483	90433484	Ints3_1	-
chr3	90433587	90433588	Ints3_2	-
chr3	90476163	90476164	Ilf2_1	+
chr3	90491000	90491001	Snapin_1	-
chr3	90508728	90508729	Chtop_2	-
chr3	90509473	90509474	Chtop_1	-
chr3	90514284	90514285	S100a1_1	-
chr3	90514431	90514432	S100a13_1	+
chr3	90603769	90603770	S100a4_1	+
chr3	90613183	90613184	S100a6_1	+
chr3	93520496	93520497	S100a11_1	+
chr3	93555162	93555163	S100a10_1	+
chr3	94443326	94443327	Mrpl9_1	+
chr3	94582561	94582562	Snx27_1	-
chr3	94582701	94582702	Snx27_2	-
chr3	94837547	94837548	Pogz_2	+
chr3	94837712	94837713	Pogz_1	+
chr3	94886926	94886927	Psmb4_1	-
chr3	94954199	94954200	Rfx5_1	+
chr3	94974737	94974738	Pi4kb_1	+
chr3	94974939	94974940	Pi4kb_2	+
chr3	95015424	95015425	Zfp687_1	-
chr3	95015645	95015646	KY467940_1	+
chr3	95042568	95042569	Psmd4_1	-
chr3	95106866	95106867	Pip5k1a_1	-
chr3	95111050	95111051	Vps72_1	+
chr3	95133973	95133974	Scnm1_1	-
chr3	95134168	95134169	Lysmd1_1	+
chr3	95142353	95142354	Tnfaip8l2_1	-
chr3	95160493	95160494	Sema6c_1	+
chr3	95217476	95217477	Gm16740_1	+
chr3	95217963	95217964	Gabpb2_1	-
chr3	95228196	95228197	Mllt11_2	-
chr3	95228353	95228354	Cdc42se1_2	+
chr3	95228677	95228678	Mllt11_1	-
chr3	95228776	95228777	Cdc42se1_1	+
chr3	95281716	95281717	Prune1_1	-
chr3	95281904	95281905	Mindy1_3	+
chr3	95282922	95282923	Mindy1_1	+
chr3	95283287	95283288	Mindy1_2	+
chr3	95315097	95315098	AK144859_1	-
chr3	95315266	95315267	Cers2_1	+
chr3	95434403	95434404	Arnt_1	+
chr3	95526830	95526831	Ctss_1	+
chr3	95588968	95588969	Golph3l_1	+
chr3	95625012	95625013	Ensa_1	+
chr3	95658779	95658780	Mcl1_1	+
chr3	95754870	95754871	Tars2_1	-
chr3	95818978	95818979	Rprd2_1	-
chr3	95855785	95855786	Prpf3_1	-
chr3	95871483	95871484	Mrps21_1	-
chr3	95871544	95871545	C920021L13Rik_1	+
chr3	95882204	95882205	Ciart_1	-
chr3	95893968	95893969	Aph1a_1	+
chr3	95929290	95929291	Anp32e_1	+
chr3	96104545	96104546	Otud7b_1	+
chr3	96172549	96172550	Sf3b4_1	+
chr3	96414831	96414832	Terc_1	-
chr3	96557959	96557960	Txnip_1	+
chr3	96576983	96576984	AK052161_1	+
chr3	96594158	96594159	Polr3gl_1	-
chr3	96629819	96629820	6330549D23Rik_1	-
chr3	96629939	96629940	Rbm8a_1	+
chr3	96635467	96635468	Pex11b_1	+
chr3	96635662	96635663	Pex11b_2	+
chr3	96635773	96635774	Pex11b_3	+
chr3	96697114	96697115	Pias3_2	+
chr3	96727472	96727473	Polr3c_1	-
chr3	96727708	96727709	Rnf115_1	+
chr3	96814520	96814521	Cd160_1	-
chr3	96880863	96880864	Gpr89_2	-
chr3	96905311	96905312	Gpr89_1	-
chr3	97158862	97158863	Acp6_1	+
chr3	97610178	97610179	Chd1l_1	-
chr3	97628853	97628854	Fmo5_1	+
chr3	97767937	97767938	Pde4dip_2	-
chr3	97901226	97901227	Sec22b_1	+
chr3	98339923	98339924	Phgdh_1	-
chr3	99141089	99141090	Wars2_1	+
chr3	100162406	100162407	Wdr3_1	-
chr3	100162526	100162527	Gdap2_1	+
chr3	100489193	100489194	Fam46c_1	-
chr3	100685439	100685440	Man1a2_1	-
chr3	100922447	100922448	Trim45_1	+
chr3	100969662	100969663	Ttf2_1	-
chr3	101287908	101287909	Cd2_1	-
chr3	101604662	101604663	Atp1a1_1	-
chr3	102995734	102995735	Sike1_1	+
chr3	103020610	103020611	Csde1_1	+
chr3	103058338	103058339	Nras_1	+
chr3	103171748	103171749	Bcas2_1	+
chr3	103279269	103279270	Trim33_1	+
chr3	103771915	103771916	AK016162_1	+
chr3	103791296	103791297	Hipk1_1	-
chr3	103803127	103803128	Gm15471_1	+
chr3	103809288	103809289	Dclre1b_1	-
chr3	103809395	103809396	Dclre1b_2	-
chr3	103809599	103809600	Ap4b1_1	+
chr3	103859745	103859746	Ptpn22_2	+
chr3	103860320	103860321	Ptpn22_1	+
chr3	103914111	103914112	Rsbn1_1	+
chr3	103968113	103968114	Phtf1_2	+
chr3	103968314	103968315	Phtf1os_1	-
chr3	103968367	103968368	Phtf1_1	+
chr3	104511886	104511887	Lrig2_1	-
chr3	104638667	104638668	Slc16a1_1	+
chr3	104781106	104781107	Ppm1j_1	+
chr3	104789033	104789034	Rhoc_1	+
chr3	104818116	104818117	Mov10_1	-
chr3	104818280	104818281	Mov10_3	-
chr3	104818545	104818546	Mov10_2	-
chr3	104864389	104864390	Capza1_1	-
chr3	104864484	104864485	St7l_2	+
chr3	104864495	104864496	Capza1_2	-
chr3	104865083	104865084	St7l_1	+
chr3	105687448	105687449	Ddx20_1	-
chr3	105801306	105801307	Rap1a_1	-
chr3	105894047	105894048	Tmigd3_1	+
chr3	105959262	105959263	Atp5f1_1	-
chr3	105959502	105959503	Wdr77_1	+
chr3	106483435	106483436	2010016I18Rik_2	-
chr3	106485939	106485940	2010016I18Rik_1	-
chr3	106486046	106486047	Dennd2d_1	+
chr3	106547569	106547570	Cept1_2	-
chr3	106547739	106547740	Cept1_1	-
chr3	106547879	106547880	Dram2_1	+
chr3	106721681	106721682	Lrif1_3	+
chr3	106721925	106721926	Lrif1_2	+
chr3	106790064	106790065	Cd53_1	-
chr3	107036169	107036170	Kcna3_1	+
chr3	107039536	107039537	AI504432_1	+
chr3	107221731	107221732	Cym_1	-
chr3	107631693	107631694	Strip1_1	-
chr3	108017817	108017818	Gstm1_1	-
chr3	108044699	108044700	Gstm4_2	-
chr3	108044865	108044866	Gstm4_1	-
chr3	108146088	108146089	Gnai3_1	-
chr3	108200435	108200436	Cyb561d1_1	-
chr3	108200821	108200822	Cyb561d1_2	-
chr3	108210465	108210466	Atxn7l2_1	-
chr3	108257023	108257024	AK005839_1	-
chr3	108257178	108257179	Psma5_1	+
chr3	108445193	108445194	Sars_1	-
chr3	108554458	108554459	Scarna2_1	-
chr3	108562166	108562167	Tmem167b_2	-
chr3	108562390	108562391	Tmem167b_1	-
chr3	108571700	108571701	Taf13_1	+
chr3	108591359	108591360	Wdr47_1	+
chr3	108653939	108653940	Clcc1_1	+
chr3	108840525	108840526	Stxbp3-1_1	-
chr3	108911726	108911727	Prpf38b_1	-
chr3	109027606	109027607	Fam102b_1	-
chr3	109123120	109123121	Slc25a24_1	+
chr3	109340760	109340761	Vav3_1	+
chr3	110250789	110250790	Prmt6_2	-
chr3	110250989	110250990	Prmt6_1	-
chr3	113630112	113630113	Rnpc3_1	-
chr3	115714788	115714789	S1pr1_1	-
chr3	115715056	115715057	S1pr1_2	-
chr3	115888096	115888097	A930005H10Rik_1	-
chr3	115888164	115888165	Dph5_1	+
chr3	116007371	116007372	Slc30a7_1	-
chr3	116007484	116007485	Extl2_2	+
chr3	116008335	116008336	Extl2_1	+
chr3	116423973	116423974	Cdc14a_1	-
chr3	116508084	116508085	Rtca_1	-
chr3	116513126	116513127	Dbt_1	+
chr3	116595009	116595010	Sass6_1	+
chr3	116662614	116662615	Mfsd14a_1	-
chr3	116712223	116712224	Slc35a3_1	-
chr3	116808098	116808099	Agl_1	-
chr3	116808243	116808244	Agl_2	-
chr3	119783285	119783286	Ptbp2_1	-
chr3	121171694	121171695	Rwdd3_1	-
chr3	121291772	121291773	Alg14_1	+
chr3	121815195	121815196	Abcd3_1	-
chr3	122274408	122274409	Dnttip2_1	+
chr3	122293751	122293752	Mir760_1	-
chr3	122924115	122924116	4933405D12Rik_1	-
chr3	122924431	122924432	1810037I17Rik_1	+
chr3	122984465	122984466	Usp53_1	-
chr3	123267478	123267479	Sec24d_1	+
chr3	123385954	123385955	Mettl14_1	-
chr3	123508335	123508336	Snhg8_1	-
chr3	126597009	126597010	Camk2d_1	+
chr3	126597309	126597310	Camk2d_3	+
chr3	127553295	127553296	Larp7_1	-
chr3	127553491	127553492	Zgrf1_1	+
chr3	127837496	127837497	Ap1ar_1	-
chr3	129532420	129532421	Elovl6_1	+
chr3	129725085	129725086	Egf_1	-
chr3	129831155	129831156	Gar1_1	-
chr3	129831395	129831396	Gar1_2	-
chr3	130060679	130060680	Sec24b_1	-
chr3	130709400	130709401	Ostc_1	-
chr3	130730346	130730347	Rpl34_1	-
chr3	131110322	131110323	Lef1_1	+
chr3	131110825	131110826	Lef1_3	+
chr3	131112793	131112794	Lef1_2	+
chr3	131564864	131564865	Papss1_1	+
chr3	132683841	132683842	Aimp1_1	-
chr3	132684171	132684172	Tbck_1	+
chr3	133091809	133091810	Gstcd_1	-
chr3	133091934	133091935	Ints12_1	+
chr3	133310132	133310133	Ppa2_1	+
chr3	133544291	133544292	Tet2_1	-
chr3	135212641	135212642	Cenpe_1	+
chr3	135423403	135423404	Cisd2_1	-
chr3	135438629	135438630	4930539J05Rik_1	-
chr3	135438749	135438750	Ube2d3_1	+
chr3	135439428	135439429	Ube2d3_2	+
chr3	135485613	135485614	Manba_1	+
chr3	135594413	135594414	Nfkb1_2	-
chr3	135691464	135691465	Nfkb1_1	-
chr3	135825656	135825657	Slc39a8_1	+
chr3	135826112	135826113	Slc39a8_2	+
chr3	135826237	135826238	Slc39a8_3	+
chr3	136670152	136670153	Ppp3ca_1	+
chr3	136670687	136670688	Ppp3ca_2	+
chr3	137864588	137864589	H2afz_1	+
chr3	137867771	137867772	Dnajb14_2	+
chr3	137867884	137867885	Dnajb14_1	+
chr3	137918557	137918558	Lamtor3_1	+
chr3	137981529	137981530	Dapp1_1	-
chr3	138143369	138143370	Mttp_2	-
chr3	138143452	138143453	Trmt10a_1	+
chr3	138489381	138489382	Metap1_1	-
chr3	138526424	138526425	Mir1956_1	+
chr3	139075228	139075229	Rap1gds1_1	-
chr3	139205892	139205893	Stpg2_1	+
chr3	142395633	142395634	Pdlim5_1	-
chr3	142496931	142496932	Gbp5_1	+
chr3	142530340	142530341	Gbp7_1	+
chr3	142560075	142560076	Gbp3_2	+
chr3	142560544	142560545	Gbp3_1	+
chr3	142620613	142620614	Gbp2_1	+
chr3	142765225	142765226	Gtf2b_1	+
chr3	142881954	142881955	Pkn2_1	-
chr3	142882479	142882480	9530052C20Rik_1	+
chr3	144202316	144202317	Lmo4_2	-
chr3	144205185	144205186	Lmo4_1	-
chr3	144570198	144570199	Hs2st1_1	-
chr3	144570377	144570378	Selenof_2	+
chr3	144570713	144570714	Selenof_1	+
chr3	144720144	144720145	Sh3glb1_2	-
chr3	144720377	144720378	Sh3glb1_1	-
chr3	145118588	145118589	Odf2l_1	+
chr3	145924351	145924352	Bcl10_1	+
chr3	146149864	146149865	Mcoln2_1	+
chr3	146150272	146150273	Mcoln2_2	+
chr3	146450474	146450475	Ctbs_1	+
chr3	146499751	146499752	Spata1_1	-
chr3	146499884	146499885	Gng5_1	+
chr3	146521412	146521413	Rpf1_1	-
chr3	146781420	146781421	Prkacb_1	-
chr3	151437932	151437933	Adgrl4_1	+
chr3	152193756	152193757	Dnajb4_1	-
chr3	152210114	152210115	Dnajb4_2	-
chr3	152210479	152210480	Fubp1_1	+
chr3	152396017	152396018	Zzz3_2	+
chr3	152396685	152396686	Zzz3_1	+
chr3	153912951	153912952	Rabggtb_1	-
chr3	153944443	153944444	Acadm_1	-
chr3	155093378	155093379	Fpgt_1	-
chr3	155093537	155093538	Lrriq3_1	+
chr3	157534396	157534397	Zranb2_1	+
chr3	158031727	158031728	Srsf11_2	-
chr3	158036605	158036606	Srsf11_1	-
chr3	158036702	158036703	Lrrc40_1	+
chr3	159495448	159495449	Depdc1a_1	+
chr3	159839736	159839737	Wls_1	+
chr4	3574808	3574809	Tmem68_1	-
chr4	3574887	3574888	Tgs1_1	+
chr4	3678123	3678124	Lyn_1	+
chr4	3835598	3835599	Rps20_1	-
chr4	3938392	3938393	Plag1_1	-
chr4	3938913	3938914	Chchd7_1	+
chr4	6365712	6365713	Sdcbp_1	+
chr4	6454270	6454271	Nsmaf_1	-
chr4	6990501	6990502	Tox_1	-
chr4	6990807	6990808	Tox_2	-
chr4	8535660	8535661	Rab2a_1	+
chr4	8535824	8535825	Rab2a_2	+
chr4	8690436	8690437	Chd7_1	+
chr4	10874591	10874592	2610301B20Rik_1	+
chr4	11007583	11007584	Plekhf2_1	-
chr4	11076204	11076205	Ndufaf6_1	-
chr4	11156475	11156476	Trp53inp1_1	+
chr4	11254228	11254229	Ints8_1	-
chr4	11322125	11322126	Dpy19l4_1	-
chr4	11486009	11486010	Virma_1	+
chr4	11558943	11558944	Rad54b_1	+
chr4	11704445	11704446	Gem_1	+
chr4	11965722	11965723	Pdp1_1	-
chr4	11966657	11966658	1700123M08Rik_1	+
chr4	12087926	12087927	Tmem67_1	-
chr4	12089390	12089391	Rbm12b2_1	+
chr4	14826412	14826413	Otud6b_1	-
chr4	14826585	14826586	Otud6b_2	-
chr4	14864259	14864260	Tmem55a_1	+
chr4	15265775	15265776	Tmem64_1	+
chr4	15945376	15945377	Decr1_1	-
chr4	15957950	15957951	Nbn_1	+
chr4	16013820	16013821	Osgin2_1	-
chr4	16163520	16163521	Ripk2_1	-
chr4	16164111	16164112	A530072M11Rik_1	+
chr4	19570082	19570083	Cpne3_1	-
chr4	19575062	19575063	Rmdn1_2	+
chr4	19575209	19575210	Rmdn1_1	+
chr4	19708540	19708541	Wwp1_2	-
chr4	19708982	19708983	Wwp1_1	-
chr4	20042095	20042096	Ggh_1	+
chr4	21727766	21727767	Ccnc_1	+
chr4	21767124	21767125	Tstd3_1	-
chr4	21776269	21776270	Usp45_1	+
chr4	21848057	21848058	Pnisr_1	+
chr4	21879680	21879681	Coq3_1	+
chr4	22357581	22357582	Fbxl4_1	+
chr4	24496458	24496459	Mms22l_1	+
chr4	25281772	25281773	Ufl1_1	-
chr4	26346644	26346645	Manea_1	-
chr4	31964127	31964128	Map3k7_1	+
chr4	32238896	32238897	Bach2_1	+
chr4	32615458	32615459	Casp8ap2_1	+
chr4	32657137	32657138	Mdn1_1	+
chr4	32800281	32800282	Lyrm2_1	+
chr4	33031319	33031320	4933421O10Rik_1	-
chr4	33031495	33031496	Ube2j1_1	+
chr4	33248508	33248509	Pnrc1_1	-
chr4	33310346	33310347	Rngtt_1	+
chr4	34550611	34550612	Akirin2_1	+
chr4	34550936	34550937	Akirin2_2	+
chr4	34614912	34614913	Orc3_1	-
chr4	34614973	34614974	Rars2_1	+
chr4	34687395	34687396	Slc35a1_1	-
chr4	34778341	34778342	Smim8_1	-
chr4	34882941	34882942	Zfp292_1	-
chr4	35225809	35225810	3110043O21Rik_1	-
chr4	35225914	35225915	AK045932_1	+
chr4	40143481	40143482	Aco1_1	+
chr4	40239824	40239825	Ddx58_1	-
chr4	40269578	40269579	Smim27_1	+
chr4	40269840	40269841	Topors_1	-
chr4	40279353	40279354	Ndufb6_1	-
chr4	40702909	40702910	Aptx_2	-
chr4	40703171	40703172	Aptx_1	-
chr4	40722312	40722313	Gm6297_1	-
chr4	40722532	40722533	Dnaja1_1	+
chr4	40722895	40722896	Mir207_1	+
chr4	40722927	40722928	Dnaja1_2	+
chr4	40757857	40757858	Smu1_1	-
chr4	40853971	40853972	B4galt1_1	-
chr4	40854536	40854537	B4galt1_2	-
chr4	40948248	40948249	Bag1_1	-
chr4	40948577	40948578	Chmp5_1	+
chr4	40970988	40970989	Nfx1_1	+
chr4	41136024	41136025	Ube2r2_1	+
chr4	41275098	41275099	Ubap2_1	-
chr4	41314820	41314821	Dcaf12_1	-
chr4	41349047	41349048	Ubap1_1	+
chr4	41464847	41464848	Kif24_1	-
chr4	41713512	41713513	Rpp25l_1	-
chr4	41741291	41741292	Sigmar1_1	-
chr4	41755312	41755313	Galt_2	+
chr4	41755555	41755556	Galt_3	+
chr4	41755730	41755731	AK139109_1	-
chr4	41756261	41756262	Galt_1	+
chr4	41774166	41774167	Ccl27a_1	-
chr4	42949917	42949918	Dnajb5_1	+
chr4	43000433	43000434	Vcp_1	-
chr4	43010231	43010232	Fancg_1	-
chr4	43010505	43010506	Fancg_2	-
chr4	43025800	43025801	Pigo_1	-
chr4	43031401	43031402	Stoml2_1	-
chr4	43040157	43040158	Fam214b_1	-
chr4	43045739	43045740	Fam214b_2	-
chr4	43046031	43046032	AK043958_1	+
chr4	43046202	43046203	Fam214b_3	-
chr4	43442302	43442303	Tesk1_1	+
chr4	43454627	43454628	Cd72_1	-
chr4	43493057	43493058	Rmrp_1	-
chr4	43493375	43493376	Ccdc107_1	+
chr4	43562403	43562404	Tln1_1	-
chr4	43562588	43562589	Tln1_2	-
chr4	43562657	43562658	Creb3_1	+
chr4	43578550	43578551	Gba2_2	-
chr4	43578892	43578893	Gba2_1	-
chr4	43578942	43578943	Rgp1_1	+
chr4	43656450	43656451	Hint2_1	-
chr4	43875573	43875574	Reck_1	+
chr4	43957691	43957692	Glipr2_1	+
chr4	44012673	44012674	Clta_1	+
chr4	44072655	44072656	Gne_1	-
chr4	44167647	44167648	Rnf38_2	-
chr4	44167945	44167946	Rnf38_3	-
chr4	44168276	44168277	Rnf38_1	-
chr4	44756655	44756656	Zcchc7_1	+
chr4	45011668	45011669	Zbtb5_2	-
chr4	45012319	45012320	Zbtb5_1	-
chr4	45018632	45018633	Polr1e_1	+
chr4	45108107	45108108	Tomm5_1	-
chr4	45320613	45320614	Exosc3_1	-
chr4	45342078	45342079	Dcaf10_1	+
chr4	45408760	45408761	Slc25a51_1	-
chr4	45530803	45530804	Shb_1	-
chr4	46138447	46138448	Tstd2_1	-
chr4	46138746	46138747	Ncbp1_1	+
chr4	46196309	46196310	Xpa_1	-
chr4	46389398	46389399	Trmo_1	-
chr4	46404230	46404231	Hemgn_1	-
chr4	46451085	46451086	Anp32b_1	+
chr4	46489318	46489319	Nans_1	+
chr4	46536107	46536108	Trim14_1	-
chr4	46566463	46566464	Coro2a_3	-
chr4	46601902	46601903	Coro2a_1	-
chr4	47474296	47474297	Alg2_1	-
chr4	47474669	47474670	Sec61b_1	+
chr4	48045285	48045286	Nr4a3_1	+
chr4	48047359	48047360	Nr4a3_2	+
chr4	48124920	48124921	Stx17_1	+
chr4	48279570	48279571	Erp44_1	-
chr4	48279801	48279802	Invs_1	+
chr4	48473421	48473422	Tex10_1	-
chr4	49521074	49521075	Mrpl50_1	-
chr4	49521221	49521222	Zfp189_1	+
chr4	49632067	49632068	Rnf20_1	+
chr4	52438928	52438929	Smc2os_1	-
chr4	52439257	52439258	Smc2_1	+
chr4	53011931	53011932	Nipsnap3b_1	+
chr4	53159891	53159892	Abca1_1	-
chr4	53217948	53217949	AK141187_1	-
chr4	55350059	55350060	Rad23b_1	+
chr4	57300368	57300369	Ptpn3_1	-
[truncated: 7,902 more rows]

## Sheet: NK cell enhancers
chr	start	stop
chr1	4496060	4496916
chr1	7395428	7395963
chr1	10284496	10285193
chr1	10325142	10325972
chr1	11099420	11100232
chr1	13162062	13163034
chr1	13266914	13267995
chr1	13301152	13302189
chr1	13426299	13427509
chr1	13592969	13594061
chr1	13639288	13640035
chr1	16641820	16642772
chr1	16747100	16747929
chr1	21317084	21317894
chr1	21332827	21334779
chr1	21342986	21344716
chr1	21354270	21354820
chr1	21618414	21619348
chr1	21618414	21619348
chr1	21870262	21871403
chr1	21959876	21961809
chr1	21962750	21964050
chr1	30809928	30810806
chr1	33578351	33579421
chr1	33583942	33584821
chr1	33883034	33883996
chr1	33942602	33943282
chr1	34433763	34435695
chr1	34478407	34480124
chr1	34480514	34481255
chr1	34484207	34486502
chr1	34484207	34486502
chr1	34510505	34511533
chr1	36260260	36261053
chr1	36263864	36264762
chr1	36265525	36266999
chr1	36274114	36275427
chr1	36281651	36282775
chr1	36293193	36295032
chr1	36293193	36295032
chr1	36296131	36297338
chr1	36315057	36315955
chr1	36571090	36572362
chr1	36603848	36605502
chr1	36611218	36612176
chr1	36719246	36720874
chr1	36719246	36720874
chr1	36722412	36723888
chr1	36722412	36723888
chr1	36737004	36737958
chr1	36744357	36745160
chr1	36766044	36767937
chr1	36784520	36786055
chr1	36784520	36786055
chr1	36797169	36798450
chr1	36805754	36808720
chr1	36824076	36824793
chr1	36882828	36885111
chr1	36911241	36912198
chr1	36913405	36915043
chr1	36930679	36931499
chr1	36947269	36947906
chr1	36961821	36963753
chr1	36995572	36996284
chr1	36998258	36998891
chr1	36999835	37001035
chr1	37300431	37301342
chr1	37307084	37309224
chr1	37326591	37328110
chr1	37477058	37479896
chr1	37481007	37481798
chr1	37490850	37492839
chr1	37613924	37614709
chr1	37614730	37615458
chr1	37619067	37620155
chr1	37696740	37697490
chr1	38427274	38428195
chr1	38693903	38694811
chr1	38776102	38778285
chr1	39608204	39609349
chr1	39713207	39714664
chr1	39746317	39747078
chr1	39841766	39842996
chr1	39895216	39897546
chr1	39901189	39903244
chr1	39922604	39924066
chr1	39936208	39937251
chr1	39954395	39955278
chr1	39961835	39962694
chr1	39985940	39987731
chr1	40379810	40381874
chr1	40379810	40381874
chr1	40382221	40383703
chr1	40385719	40387222
chr1	40392849	40394039
chr1	40468902	40471488
chr1	40472486	40474889
chr1	40475267	40477756
chr1	40475267	40477756
chr1	40478318	40480811
chr1	40497203	40498288
chr1	40500362	40504029
chr1	40500362	40504029
chr1	40504041	40505162
chr1	40523738	40524812
chr1	40530664	40532046
chr1	40533594	40535725
chr1	40533594	40535725
chr1	43138003	43139242
chr1	43144315	43145214
chr1	43223878	43225577
chr1	43239979	43241983
chr1	43450528	43451241
chr1	43463602	43464677
chr1	43463602	43464677
chr1	43464695	43466511
chr1	43467371	43468262
chr1	43519773	43521671
chr1	43539318	43540643
chr1	43542027	43543033
chr1	43558096	43558896
chr1	43562334	43562969
chr1	43843340	43844096
chr1	43896847	43897855
chr1	44121909	44122913
chr1	46852030	46853145
chr1	46863858	46864933
chr1	51448374	51449385
chr1	51466257	51467164
chr1	51467768	51469035
chr1	51473018	51474405
chr1	51500754	51502880
chr1	51502919	51503621
chr1	51508417	51509651
chr1	51531995	51532767
chr1	51569354	51571518
chr1	51571742	51573555
chr1	51577536	51578705
chr1	51583696	51585843
chr1	51593512	51595286
chr1	51929305	51930526
chr1	51933924	51935833
chr1	52003872	52004887
chr1	52010380	52013368
chr1	52019260	52020916
chr1	52021714	52023019
chr1	52034020	52036105
chr1	52034020	52036105
chr1	52038921	52041055
chr1	52363388	52364271
chr1	52365968	52366958
chr1	52374356	52375822
chr1	52387914	52388585
chr1	52388619	52389589
chr1	52577901	52579042
chr1	52638798	52639820
chr1	52644171	52644751
chr1	52649678	52650634
chr1	52651321	52653792
chr1	52651321	52653792
chr1	52654743	52655692
chr1	52708150	52710334
chr1	52720313	52721110
chr1	52799039	52801562
chr1	52799039	52801562
chr1	53754968	53755757
chr1	53772778	53775895
chr1	53781102	53782796
chr1	53791246	53792456
chr1	53796741	53798444
chr1	53796741	53798444
chr1	53823391	53825560
chr1	53837936	53839461
chr1	53844714	53847010
chr1	53844714	53847010
chr1	53844714	53847010
chr1	53850318	53852859
chr1	53856463	53857428
chr1	53875628	53876545
chr1	54584840	54586484
chr1	54660234	54662010
chr1	54827343	54828462
chr1	54841569	54842523
chr1	54858542	54859581
chr1	54880951	54882016
chr1	54882733	54883746
chr1	54896201	54897138
chr1	54912022	54914222
chr1	54914254	54915093
chr1	55215185	55216057
chr1	58410195	58411231
chr1	58797238	58798101
chr1	58806657	58807270
chr1	58955728	58956810
chr1	59913380	59914474
chr1	59917171	59918064
chr1	60016771	60017559
chr1	60482670	60483523
chr1	60530444	60531232
chr1	60702345	60703157
chr1	60744073	60744811
chr1	60755216	60756426
chr1	60757563	60759014
chr1	60761337	60762174
chr1	60860367	60861185
chr1	60915996	60917044
chr1	60990060	60991096
chr1	62829543	62830407
chr1	62872221	62873502
chr1	62874675	62877277
chr1	63180824	63181649
chr1	64078236	64079209
chr1	64481933	64482725
chr1	64527368	64528194
chr1	64535431	64536321
chr1	64755760	64758187
chr1	64755760	64758187
chr1	64796913	64798135
chr1	64842174	64843084
chr1	64949049	64950372
chr1	64970291	64971408
chr1	66815776	66817168
chr1	66815776	66817168
chr1	69680802	69681627
chr1	69682123	69683664
chr1	69688747	69689506
chr1	69759390	69760307
chr1	69768542	69769419
chr1	74200910	74201623
chr1	74248375	74249967
chr1	74295087	74296003
chr1	74386442	74387478
chr1	74800187	74801206
chr1	74802860	74803638
chr1	75234393	75235248
chr1	79581192	79582096
chr1	79750570	79753018
chr1	80107412	80108813
chr1	80153146	80153869
chr1	80362319	80363160
chr1	80381265	80381992
chr1	80408346	80409166
chr1	80664808	80666293
chr1	80727965	80729359
chr1	80729958	80731724
chr1	80737704	80738388
chr1	80745801	80747726
chr1	80745801	80747726
chr1	80765219	80766238
chr1	82819105	82819976
chr1	82832168	82833189
chr1	84305497	84306314
chr1	84406550	84407768
chr1	84709912	84710703
chr1	84914898	84915637
chr1	85679859	85680923
chr1	85686275	85688023
chr1	85686275	85688023
chr1	85702494	85704406
chr1	85719853	85721167
chr1	85731992	85733503
chr1	85739571	85740466
chr1	85750467	85752925
chr1	85750467	85752925
chr1	85797338	85798033
chr1	85837414	85838778
chr1	85861376	85861832
chr1	85895049	85896188
chr1	85987893	85989122
chr1	85997857	85998840
chr1	86047957	86049018
chr1	86186374	86187570
chr1	86188949	86189966
chr1	86209841	86211342
chr1	86211841	86214838
chr1	86228271	86229254
chr1	86253187	86254132
chr1	86262241	86264794
chr1	86267101	86268129
chr1	86300516	86302204
chr1	86343891	86345040
chr1	86414842	86416398
chr1	86440094	86441051
chr1	86440094	86441051
chr1	86500780	86502211
chr1	86530703	86532977
chr1	87606690	87608853
chr1	87623902	87627941
chr1	87623902	87627941
chr1	87635974	87638972
chr1	87639364	87641225
chr1	87647627	87648282
chr1	87827835	87828872
chr1	87828943	87830418
chr1	87828943	87830418
chr1	87840376	87841800
chr1	87846675	87847941
chr1	87866451	87867284
chr1	87899636	87900322
chr1	87928372	87929124
chr1	88474255	88475945
chr1	88474255	88475945
chr1	88586013	88588266
chr1	88644223	88645120
chr1	88654291	88656076
chr1	88680618	88681785
chr1	88682217	88683324
chr1	88684162	88685858
chr1	88697996	88700005
chr1	88704930	88706446
chr1	88707854	88709582
chr1	89078629	89079303
chr1	89130166	89130868
chr1	89600669	89601823
chr1	89602630	89603551
chr1	91022266	91023104
chr1	91023629	91024964
chr1	91048857	91050209
chr1	91054662	91058447
chr1	91054662	91058447
chr1	91061975	91063768
chr1	91063947	91067720
chr1	91069268	91070180
chr1	91079711	91081174
chr1	91085782	91086885
chr1	91091044	91094719
chr1	91091044	91094719
chr1	91091044	91094719
chr1	91096274	91097203
chr1	91098346	91099947
chr1	91178748	91179916
chr1	91192896	91193797
chr1	92058495	92060629
chr1	92058495	92060629
chr1	92063849	92065034
chr1	92069250	92070099
chr1	92079430	92080895
chr1	92773875	92775542
chr1	92773875	92775542
chr1	92803049	92804757
chr1	92805087	92807556
chr1	92811392	92812386
chr1	92815665	92816560
chr1	93668476	93669327
chr1	94034590	94036613
chr1	94040213	94041057
chr1	94074363	94075424
chr1	94091340	94092447
chr1	95267611	95268849
chr1	95655100	95656172
chr1	95656962	95657964
chr1	97580252	97581102
chr1	97622849	97624160
chr1	97662385	97663398
chr1	105980207	105981945
chr1	106515148	106516479
chr1	106581146	106582710
chr1	106599153	106601934
chr1	106605956	106607546
chr1	106611990	106614343
chr1	106615296	106616278
chr1	106646990	106647948
chr1	106709817	106710803
chr1	106711292	106713164
chr1	106866466	106867204
chr1	106867608	106868415
chr1	106941956	106942712
chr1	120054836	120056469
chr1	120056974	120057833
chr1	120099259	120100238
chr1	120139136	120139763
chr1	120244952	120246171
chr1	120842317	120843297
chr1	120843353	120844789
chr1	120845495	120846950
chr1	125419762	125420499
chr1	125440857	125442313
chr1	125467596	125468718
chr1	127228011	127228774
chr1	127232786	127234190
chr1	127239658	127240552
chr1	127241980	127243676
chr1	127302452	127305112
chr1	127305417	127307026
chr1	127308180	127310189
chr1	127318004	127319152
chr1	127319539	127320706
chr1	127321360	127323094
chr1	127344433	127346638
chr1	127500023	127501313
chr1	127625273	127627140
chr1	127625273	127627140
chr1	127637324	127638633
chr1	127693447	127694059
chr1	128435571	128436680
chr1	128446192	128448100
chr1	128547980	128550036
chr1	128569784	128571397
chr1	128601188	128601919
chr1	128604811	128607340
chr1	128607400	128608890
chr1	128611580	128612263
chr1	128612643	128616350
chr1	128703265	128704175
chr1	128704208	128706296
chr1	128712297	128713630
chr1	128765161	128766255
chr1	128766372	128768544
chr1	128781565	128783012
chr1	128786523	128788061
chr1	128808303	128809342
chr1	128830261	128831488
chr1	128831520	128833679
chr1	129624391	129625100
chr1	130474745	130475511
chr1	130516391	130518031
chr1	131020764	131023418
chr1	131025344	131026497
chr1	131048957	131049895
chr1	131089406	131090741
chr1	131095874	131097598
chr1	131203848	131205209
chr1	131460759	131461514
chr1	132010388	132012429
chr1	132142914	132143730
chr1	132311056	132312018
chr1	132347994	132348725
chr1	133029566	133030332
chr1	133158942	133159913
chr1	133347369	133348674
chr1	133694443	133695533
chr1	133697827	133698607
chr1	133799524	133800349
chr1	133815350	133816975
chr1	133820780	133822089
chr1	133841374	133842982
chr1	133841374	133842982
chr1	133846732	133847451
chr1	134059592	134061921
chr1	134062793	134064653
chr1	134066421	134067653
chr1	134073589	134077244
chr1	134082409	134084259
chr1	134092272	134094524
chr1	134097145	134100568
chr1	134509789	134510698
chr1	135134856	135135838
chr1	135267576	135268922
chr1	135592449	135595238
chr1	135659058	135660955
chr1	136134555	136136383
chr1	136674920	136675513
chr1	136684912	136686134
chr1	137900191	137901325
chr1	138130022	138130692
chr1	138135087	138138586
chr1	138141937	138142794
chr1	138143760	138146117
chr1	138143760	138146117
chr1	138148493	138149761
chr1	138152547	138153544
chr1	138153657	138155041
chr1	138156796	138159827
chr1	138156796	138159827
chr1	138161941	138163815
chr1	138165165	138166792
chr1	138171803	138173339
chr1	138179666	138180799
chr1	138187538	138188898
chr1	138190687	138193274
chr1	138232801	138234319
chr1	138247868	138249513
chr1	138247868	138249513
chr1	138251608	138252666
chr1	138258437	138259616
chr1	138275595	138276361
chr1	138288364	138289263
chr1	138289419	138293112
chr1	138289419	138293112
chr1	138297664	138300579
chr1	138297664	138300579
chr1	138301394	138305337
chr1	138301394	138305337
chr1	138322408	138323687
chr1	138327221	138329215
chr1	138348186	138349241
chr1	138516785	138517926
chr1	138559238	138560520
chr1	138584356	138585535
chr1	138587606	138588560
chr1	138822221	138822854
chr1	138831145	138831681
chr1	138843185	138843789
chr1	138954828	138955653
chr1	138973378	138974281
chr1	143307263	143307876
chr1	143319212	143320020
chr1	143465131	143466738
chr1	143830516	143831288
chr1	143853673	143854520
chr1	143916240	143918724
chr1	143918838	143919979
chr1	144005668	144008088
chr1	144005668	144008088
chr1	144085842	144086523
chr1	144200032	144201205
chr1	144202589	144203852
chr1	144206078	144206952
chr1	144215171	144215873
chr1	144242993	144244237
chr1	144244738	144248072
chr1	144244738	144248072
chr1	144250266	144251130
chr1	144300305	144302132
chr1	144300305	144302132
chr1	144306205	144308989
chr1	144306205	144308989
chr1	144330033	144331029
chr1	144355367	144356448
chr1	151176957	151178355
chr1	151682238	151683700
chr1	151684706	151686038
chr1	151688688	151690238
chr1	151764043	151764592
chr1	151783264	151784057
chr1	151979800	151980768
chr1	152007824	152011321
chr1	152007824	152011321
chr1	152018965	152019953
chr1	152024763	152025707
chr1	152049259	152050140
chr1	152083184	152085235
chr1	152083184	152085235
chr1	152597579	152598449
chr1	152598723	152600354
chr1	152598723	152600354
chr1	152902711	152905211
chr1	152902711	152905211
chr1	153066233	153067153
chr1	153084210	153086471
chr1	153087350	153088509
chr1	153237877	153238650
chr1	153617066	153618069
chr1	153634888	153635675
chr1	153709090	153710015
chr1	153723100	153724087
chr1	153726370	153727104
chr1	154033630	154034935
chr1	155025709	155026474
chr1	155039589	155041698
chr1	155042421	155043497
chr1	155048631	155051804
chr1	155055787	155057160
chr1	155058468	155060466
chr1	155172535	155174294
chr1	155476039	155476835
chr1	156615031	156616396
chr1	160047363	160048244
chr1	160052122	160055215
chr1	160804978	160805962
chr1	160842307	160843087
chr1	161479501	161480471
chr1	161670332	161671672
chr1	161674164	161675082
chr1	161704286	161705755
chr1	161706833	161707744
chr1	161712635	161713664
chr1	161728370	161729326
chr1	161733587	161736053
chr1	161764490	161767943
chr1	161764490	161767943
chr1	161773942	161775882
chr1	161775984	161777538
chr1	161777566	161780752
chr1	161777566	161780752
chr1	161784247	161785232
chr1	161794156	161795599
chr1	161798593	161799565
chr1	161804052	161805472
chr1	161808698	161809973
chr1	161893855	161895017
chr1	162206997	162207916
chr1	162727787	162728660
chr1	163259254	163260280
chr1	164052641	164055239
chr1	164063529	164064795
chr1	164069080	164072717
chr1	164069080	164072717
chr1	164072883	164074308
chr1	164074496	164076114
chr1	164076444	164080221
chr1	164076444	164080221
chr1	164082381	164083852
chr1	164084085	164084858
chr1	164098250	164098986
chr1	164133534	164139349
chr1	164429449	164430418
chr1	164448040	164451353
chr1	164448040	164451353
chr1	164930497	164931606
chr1	164931622	164932621
chr1	164953061	164954238
chr1	164956765	164957774
chr1	164959084	164961678
chr1	164964689	164966901
chr1	164974983	164976447
chr1	165012272	165014157
chr1	165182774	165184872
chr1	165682367	165683155
chr1	165691208	165692033
chr1	165700222	165703061
chr1	165711039	165712359
chr1	165722318	165723706
chr1	165729803	165730822
chr1	165735840	165736747
chr1	165779692	165782462
chr1	165779692	165782462
chr1	165789293	165791267
chr1	165816009	165817061
chr1	165840121	165841531
chr1	165843459	165846787
chr1	165843459	165846787
chr1	165847213	165851198
chr1	166015638	166016828
chr1	166016921	166017788
chr1	166016921	166017788
chr1	166137020	166139302
chr1	166137020	166139302
chr1	166153170	166154037
chr1	166387753	166389348
chr1	166899046	166900526
chr1	167241915	167242706
chr1	167245097	167245970
chr1	167551308	167552364
chr1	168283556	168284411
chr1	170214281	170215103
chr1	170218263	170219099
chr1	170227455	170228210
chr1	170235001	170236156
chr1	170270325	170271552
chr1	170272971	170273963
chr1	170275742	170276336
chr1	170337376	170338344
chr1	170351182	170352267
chr1	170479933	170480882
chr1	170550811	170551627
chr1	170622738	170623522
chr1	170853367	170854126
chr1	170861209	170862434
chr1	170868378	170869001
chr1	170933862	170934975
chr1	170971288	170973839
chr1	170997507	170998814
chr1	171033173	171034916
chr1	171060135	171060975
chr1	171061322	171062183
chr1	171113549	171114614
chr1	171118115	171120167
chr1	171118115	171120167
chr1	171355834	171356434
chr1	171553540	171554463
chr1	171604396	171605382
chr1	171627239	171630476
chr1	171630875	171632089
chr1	171636624	171637865
chr1	171643231	171644846
chr1	171646185	171647884
chr1	171843645	171846138
chr1	171849072	171850512
chr1	171920770	171922040
chr1	171965818	171966756
chr1	172143356	172143976
chr1	172216862	172217755
chr1	172276500	172278116
chr1	172307614	172308614
chr1	172309258	172312317
chr1	172309258	172312317
chr1	172512399	172514841
chr1	172524760	172527606
chr1	172524760	172527606
chr1	172528448	172529349
chr1	172548208	172549199
chr1	173431897	173433167
chr1	173435981	173438278
chr1	173435981	173438278
chr1	173439650	173441970
chr1	173439650	173441970
chr1	176823475	176824631
chr1	176992996	176994294
chr1	177455243	177456041
chr1	177666860	177668028
chr1	178321008	178321769
chr1	178368419	178370009
chr1	179548763	179549991
chr1	179828593	179829450
chr1	179844645	179845350
chr1	180199003	180200110
chr1	180354704	180357145
chr1	180354704	180357145
chr1	180354704	180357145
chr1	180357279	180358518
chr1	180357279	180358518
chr1	180362792	180367258
chr1	180362792	180367258
chr1	180362792	180367258
chr1	180370649	180371682
chr1	180371920	180373541
chr1	180386885	180391532
chr1	180386885	180391532
chr1	180392001	180393881
chr1	180392001	180393881
chr1	180397253	180399008
chr1	180402770	180405654
chr1	180402770	180405654
chr1	180416799	180417565
chr1	180427829	180429308
chr1	180431546	180432505
chr1	180810190	180811380
chr1	180835075	180835888
chr1	180911680	180912587
chr1	180940507	180941377
chr1	181218659	181219519
chr1	181226379	181229752
chr1	181230371	181233285
chr1	181230371	181233285
chr1	181235780	181236615
chr1	181246572	181248488
chr1	181456576	181457634
chr1	181459233	181460503
chr1	181694012	181694808
chr1	181860061	181862360
chr1	181872301	181873902
chr1	181881257	181882195
chr1	181883064	181883626
chr1	182254215	182255905
chr1	182357401	182358631
chr1	182362316	182364322
chr1	182431811	182433204
chr1	182505637	182507073
chr1	182519606	182521136
chr1	182539123	182539951
chr1	183803059	183804796
chr1	184005148	184006696
chr1	184048460	184049708
chr1	184064245	184064852
chr1	184065761	184067651
chr1	184533934	184535058
chr1	184732991	184734529
chr1	185104969	185106639
chr1	185104969	185106639
chr1	185118837	185122327
chr1	185118837	185122327
chr1	185118837	185122327
chr1	189795116	189796045
chr1	191102573	191103275
chr1	191110857	191111866
chr1	191193143	191194865
chr1	191230213	191231231
chr1	191416352	191417896
chr1	191418650	191419776
chr1	191420599	191423088
chr1	191425744	191426603
chr1	191738220	191739070
chr1	192061152	192062120
chr1	192062258	192063446
chr1	192339853	192340994
chr1	192599404	192600264
chr1	192603878	192605848
chr1	192606265	192607858
chr1	192694240	192694977
chr1	192730114	192731363
chr1	192732924	192733677
chr1	193247713	193249020
chr1	193337524	193339058
chr1	193443989	193444823
chr1	194975850	194978456
chr1	194994642	194996078
chr10	6986911	6989303
chr10	6986911	6989303
chr10	6982308	6984173
chr10	6956023	6957062
chr10	5603223	5604161
chr10	5163357	5164264
chr10	4784681	4785604
chr10	4622046	4622601
chr10	4619186	4619915
chr10	4456432	4456960
chr10	4384629	4385461
chr10	7600451	7601235
chr10	7824354	7825762
chr10	7844017	7844814
chr10	7900090	7900971
chr10	7906843	7908095
chr10	7976347	7976964
chr10	7992403	7993258
chr10	8054574	8055999
chr10	8065150	8066300
chr10	8121622	8122544
chr10	8122945	8123460
chr10	8127295	8128420
chr10	8129612	8131563
chr10	8197308	8198356
chr10	8203625	8204774
chr10	8213251	8214833
chr10	8221284	8222526
chr10	8414781	8415861
chr10	8504690	8506923
chr10	8516511	8518195
chr10	8529904	8531224
chr10	8531282	8532431
chr10	8535210	8536196
chr10	8745901	8748294
chr10	8745901	8748294
chr10	10184108	10185517
chr10	12805442	12806540
chr10	12812573	12814791
chr10	12821088	12822212
chr10	12823182	12824554
chr10	12836044	12837077
chr10	12841318	12842135
chr10	12874746	12875405
chr10	12888090	12889134
chr10	12918949	12920027
chr10	13969615	13971558
chr10	13982082	13984754
chr10	13998641	13999485
chr10	14013608	14014748
chr10	14016039	14017059
chr10	14017449	14018581
chr10	14026747	14027598
chr10	14033309	14034713
chr10	14044769	14047108
chr10	14044769	14047108
chr10	14085476	14086898
chr10	14186092	14187221
chr10	17513279	17514035
chr10	17564984	17565866
chr10	17565892	17567405
chr10	17728507	17729266
chr10	17732848	17733544
chr10	17771725	17773075
chr10	17774883	17775681
chr10	17987507	17989820
chr10	17987507	17989820
chr10	18008003	18008655
chr10	18064284	18065224
chr10	18196684	18197948
chr10	18530771	18531564
chr10	18910791	18911446
chr10	18916711	18917955
chr10	18936078	18936628
chr10	18946065	18947573
chr10	18963937	18965537
chr10	18999128	18999868
chr10	19000449	19009828
chr10	19000449	19009828
chr10	19000449	19009828
chr10	19000449	19009828
chr10	19060185	19064265
chr10	19064634	19066504
chr10	19067829	19069217
chr10	19093519	19095088
chr10	19099071	19100523
chr10	19104277	19105844
chr10	19167101	19168841
chr10	19170243	19172670
chr10	19184453	19186940
chr10	19187720	19189404
chr10	19209363	19210471
chr10	19214747	19215575
chr10	19333215	19334085
chr10	19491263	19492502
chr10	19493448	19496881
chr10	19497279	19499327
chr10	19503611	19505723
chr10	19505792	19507109
chr10	19515824	19517616
chr10	19521348	19523148
chr10	19529504	19530933
chr10	19562446	19563193
chr10	19577134	19580429
chr10	19581642	19583665
chr10	19600836	19602383
chr10	19691213	19693747
chr10	19691213	19693747
chr10	19718480	19719482
chr10	19815190	19815989
chr10	20119100	20120376
chr10	20123060	20124023
chr10	20223140	20224029
chr10	20233204	20234033
chr10	20235348	20236281
chr10	20834545	20835887
chr10	20854669	20855791
chr10	20864309	20865770
chr10	20882241	20883261
chr10	20906675	20907910
chr10	21186508	21187265
chr10	21196276	21197203
chr10	21202994	21206711
chr10	21202994	21206711
chr10	21207142	21208219
chr10	21223204	21225036
chr10	21223204	21225036
chr10	21234785	21236233
chr10	21244787	21246071
chr10	21251587	21252845
chr10	21479159	21480005
chr10	21904905	21906017
chr10	21907661	21909453
chr10	21946375	21947702
chr10	21974979	21977030
chr10	21974979	21977030
chr10	22295377	22296539
chr10	22298659	22300173
chr10	24164268	24165172
chr10	24291371	24292148
chr10	24753456	24755109
chr10	25432511	25433533
chr10	26202667	26203548
chr10	26227867	26228681
chr10	26797895	26800520
chr10	28128234	28128992
chr10	28593864	28594514
chr10	34030042	34031582
chr10	34110585	34111746
chr10	34170024	34172208
chr10	34172345	34173592
chr10	34197026	34198667
chr10	34199570	34200289
chr10	39170025	39172415
chr10	39192353	39193467
chr10	39239581	39240471
chr10	39315280	39316031
chr10	39339340	39340532
chr10	39390272	39391233
chr10	39401769	39403564
chr10	39411984	39413907
chr10	39411984	39413907
chr10	39434580	39435554
chr10	39468861	39473301
chr10	39468861	39473301
chr10	39468861	39473301
chr10	39468861	39473301
chr10	39478762	39480320
chr10	39484066	39488776
chr10	39484066	39488776
chr10	39484066	39488776
chr10	39505089	39507443
chr10	39505089	39507443
chr10	39514178	39515587
chr10	39516862	39518123
chr10	39519681	39520946
chr10	39535002	39536074
chr10	39599846	39601444
chr10	40162995	40165512
chr10	40162995	40165512
chr10	40162995	40165512
chr10	40258397	40259527
chr10	40309677	40310907
chr10	40371387	40372933
chr10	40384941	40387035
chr10	40384941	40387035
chr10	40399992	40400961
chr10	40478895	40479842
chr10	40527011	40528272
chr10	41304817	41305736
chr10	41472786	41474714
chr10	41529824	41530687
chr10	41595289	41596446
chr10	41599284	41600454
chr10	41711417	41712173
chr10	41893299	41894436
chr10	41936606	41938339
chr10	41957192	41958410
chr10	41970425	41971161
chr10	41978204	41979966
chr10	41983939	41984980
chr10	42026888	42028663
chr10	42056788	42057883
chr10	42068227	42069749
chr10	42268578	42270302
chr10	42838039	42839671
chr10	42859568	42861161
chr10	42861304	42863402
chr10	42861304	42863402
chr10	42863559	42864579
chr10	42888072	42888837
chr10	42897096	42898357
chr10	42934359	42935303
chr10	42961800	42963467
chr10	42961800	42963467
chr10	43979827	43981143
chr10	43979827	43981143
chr10	43995750	43999163
chr10	43995750	43999163
chr10	43995750	43999163
chr10	44400010	44402818
chr10	44400010	44402818
chr10	44403066	44404275
chr10	44428984	44430107
chr10	44447101	44449113
chr10	44447101	44449113
chr10	44449463	44450273
chr10	44699953	44700784
chr10	44820205	44821077
chr10	44821218	44822509
chr10	44978919	44979756
chr10	45000286	45001487
chr10	45002468	45003913
chr10	45002468	45003913
chr10	45019009	45022035
chr10	45026461	45028112
chr10	45047895	45049441
chr10	45578215	45578980
chr10	45578215	45578980
chr10	51453347	51455295
chr10	53348064	53348887
chr10	53373902	53375057
chr10	53460871	53462025
chr10	53595134	53596272
chr10	53629160	53630594
chr10	53770637	53772678
chr10	53795734	53796514
chr10	54039522	54041352
chr10	54091809	54092742
chr10	54117235	54119968
chr10	57486996	57487768
chr10	57799205	57799900
chr10	58369805	58370853
chr10	59510898	59512571
chr10	59514455	59515633
chr10	59588915	59590641
chr10	59894601	59897953
chr10	59894601	59897953
chr10	59900743	59901959
chr10	59932178	59933812
chr10	59973805	59975731
chr10	59980505	59981931
chr10	60037852	60038845
chr10	60287156	60288622
chr10	60350433	60352746
chr10	60388327	60390227
chr10	60395486	60397514
chr10	60395486	60397514
chr10	61187784	61189296
chr10	61198768	61200554
chr10	61203723	61204453
chr10	61231630	61232347
chr10	61260147	61264864
chr10	61260147	61264864
chr10	61265959	61269173
chr10	61277827	61278548
chr10	61280835	61281886
chr10	61299399	61301581
chr10	61302784	61304810
chr10	61305522	61306929
chr10	61317275	61319093
chr10	61317275	61319093
chr10	61326867	61328806
chr10	61333225	61335420
chr10	61335885	61337143
chr10	61422712	61423410
chr10	61558969	61560091
chr10	62194620	62195968
chr10	62196090	62196922
chr10	62491404	62492015
chr10	62496045	62496828
chr10	62500001	62501739
chr10	62500001	62501739
chr10	62532425	62533475
chr10	62542293	62545032
chr10	62553369	62554587
chr10	62599954	62600580
chr10	66852585	66853831
chr10	66863873	66865617
chr10	66953284	66954205
chr10	67049025	67049829
chr10	67068769	67069718
chr10	67097001	67099078
chr10	67111652	67112554
chr10	67188699	67190676
chr10	67497116	67497988
chr10	67503163	67504213
chr10	67585866	67587194
chr10	67607030	67608668
chr10	67609980	67611527
chr10	67619798	67620480
chr10	67643404	67644206
chr10	67644251	67645356
chr10	67646525	67649173
chr10	67656907	67658717
chr10	67661358	67664028
chr10	67680029	67681005
chr10	67701509	67704144
chr10	67716650	67718411
chr10	67727088	67728469
chr10	68191388	68193593
chr10	68191388	68193593
chr10	68199069	68200821
chr10	68238489	68242026
chr10	68238489	68242026
chr10	68276129	68278421
chr10	68279413	68280738
chr10	68472004	68474014
chr10	68509905	68511156
chr10	68512156	68513140
chr10	68673226	68674316
chr10	70132748	70133819
chr10	70148949	70149667
chr10	71246407	71247644
chr10	71263809	71264958
chr10	71265830	71266792
chr10	71290834	71291788
chr10	74920276	74921374
chr10	74920276	74921374
chr10	75125366	75126136
chr10	75282427	75283693
chr10	75289231	75290096
chr10	75293940	75295666
chr10	75299057	75305280
chr10	75299057	75305280
chr10	75299057	75305280
chr10	75319937	75321014
chr10	75325807	75327638
chr10	75434123	75435136
chr10	75564663	75566144
chr10	75591201	75592377
chr10	76269958	76270722
chr10	76271064	76271967
chr10	76306487	76307536
chr10	76541059	76542035
chr10	76542091	76544119
chr10	77022279	77023585
chr10	77272788	77273910
chr10	77518824	77519799
chr10	77520137	77521143
chr10	77521764	77523086
chr10	77536345	77538674
chr10	77536345	77538674
chr10	77539323	77539921
chr10	77540262	77541480
chr10	77583480	77584264
chr10	77609284	77610167
chr10	77626296	77627229
chr10	77627276	77628170
chr10	77629389	77630681
chr10	77658418	77659333
chr10	78086148	78087723
chr10	78159695	78161646
chr10	78159695	78161646
chr10	78264551	78265377
chr10	78303225	78304563
chr10	78304761	78305685
chr10	78457224	78458797
chr10	79690562	79691466
chr10	79691811	79692758
chr10	79748024	79748805
chr10	79896693	79898355
chr10	79933147	79933874
chr10	79936284	79938092
chr10	80018564	80019275
chr10	80023421	80026468
chr10	80029877	80031163
chr10	80031420	80034510
chr10	80074855	80075906
chr10	80116682	80117901
chr10	80136819	80138214
chr10	80136819	80138214
chr10	80158047	80161498
chr10	80158047	80161498
chr10	80164690	80165704
chr10	80618055	80618819
chr10	80622881	80624273
chr10	80622881	80624273
chr10	80662127	80662684
chr10	80663256	80664793
chr10	80681649	80682535
chr10	80691889	80697369
chr10	80691889	80697369
chr10	80691889	80697369
chr10	80691889	80697369
chr10	80751133	80752131
chr10	80757586	80759485
chr10	80763185	80764245
chr10	80856986	80857978
chr10	80939163	80940487
chr10	80956220	80957363
chr10	81127222	81128071
chr10	81133952	81134889
chr10	81172895	81173848
chr10	81254486	81255375
chr10	81404429	81405362
chr10	81407312	81409429
chr10	81407312	81409429
chr10	81432182	81435021
chr10	81432182	81435021
chr10	81432182	81435021
chr10	81463186	81464078
chr10	81504961	81506182
chr10	81509364	81511085
chr10	81536785	81537903
chr10	81538327	81539268
chr10	81551269	81552227
chr10	81563903	81564779
chr10	81602566	81603271
chr10	81613795	81614611
chr10	82862859	82863682
chr10	82887055	82887878
chr10	82889693	82891652
chr10	82892361	82893286
chr10	82899570	82900997
chr10	82982109	82982949
chr10	83003654	83007494
chr10	83003654	83007494
chr10	83152593	83154917
chr10	83161344	83162429
chr10	83329778	83331371
chr10	83335990	83337081
chr10	84547947	84548739
chr10	84570755	84571842
chr10	85352335	85353366
chr10	85410982	85411963
chr10	85501763	85504095
chr10	85501763	85504095
chr10	86727146	86728407
chr10	86846694	86848207
chr10	86848960	86849869
chr10	88389008	88390924
chr10	88403802	88404682
chr10	88405331	88406849
chr10	88417287	88418801
chr10	88419791	88421731
chr10	88427368	88429016
chr10	88540120	88540855
chr10	88584146	88585229
chr10	89747142	89748545
chr10	91138252	91138928
chr10	93082913	93084174
chr10	93122619	93125135
chr10	93144421	93145535
chr10	93165500	93167011
chr10	93167161	93168871
chr10	93167161	93168871
chr10	93170803	93172034
chr10	93179591	93180311
chr10	93190558	93192583
chr10	93190558	93192583
chr10	93225502	93226354
chr10	93335470	93337031
chr10	93342998	93344137
chr10	93353264	93354151
chr10	93370122	93371135
chr10	93402252	93403833
chr10	93404652	93405478
chr10	93441689	93442734
chr10	94507290	94510020
chr10	94507290	94510020
chr10	94524551	94525604
chr10	94525617	94526385
chr10	94544888	94546276
chr10	94551322	94552691
chr10	94827654	94830159
chr10	94846059	94850247
chr10	94846059	94850247
chr10	94846059	94850247
chr10	94864352	94865092
chr10	94938406	94939647
chr10	94942121	94944534
chr10	95008397	95009768
chr10	95021029	95021877
chr10	95178523	95181877
chr10	95178523	95181877
chr10	95195382	95196527
chr10	95283115	95284096
chr10	95313182	95314197
chr10	95565254	95566170
chr10	95720011	95721151
chr10	95767555	95768815
chr10	95777026	95778823
chr10	95779429	95781895
chr10	95941201	95942394
chr10	95970499	95971325
chr10	96179794	96183097
chr10	96200718	96201922
chr10	96213414	96215813
chr10	96237953	96239605
chr10	96240337	96241310
chr10	96273499	96274826
chr10	96325003	96325975
chr10	96328183	96329330
chr10	96350318	96352578
chr10	96356311	96358478
chr10	96368643	96371967
chr10	96368643	96371967
chr10	96372043	96375478
chr10	96377158	96379665
chr10	96377158	96379665
chr10	96398233	96399343
chr10	96399376	96402031
chr10	96407042	96408819
chr10	96460357	96461080
chr10	96515174	96516526
chr10	96588032	96589190
chr10	96589385	96590438
chr10	96599599	96600385
chr10	96619587	96625058
chr10	96619587	96625058
chr10	96619587	96625058
chr10	96628108	96629713
chr10	96720957	96721563
chr10	96724557	96725544
chr10	96871268	96872449
chr10	97312165	97314397
chr10	98683604	98684891
chr10	98728465	98729080
chr10	98743776	98744957
chr10	98745194	98746534
chr10	98774188	98777306
chr10	98774188	98777306
chr10	98780796	98782584
chr10	98785024	98786610
chr10	98785024	98786610
chr10	98798465	98799691
chr10	98877343	98879219
chr10	98954205	98955196
chr10	99126644	99128554
chr10	99194361	99195060
chr10	99241075	99242994
chr10	99267990	99269498
chr10	99353726	99354582
chr10	99392833	99394010
chr10	100965382	100966276
chr10	107932161	107933045
chr10	108117252	108119286
chr10	108117252	108119286
chr10	108119322	108121179
chr10	108167767	108168755
chr10	108178241	108179204
chr10	108333392	108334108
chr10	111102926	111103695
chr10	111107187	111107938
chr10	111126896	111128136
chr10	111213603	111215249
chr10	111213603	111215249
chr10	111232061	111232616
chr10	111234309	111235029
chr10	111515953	111517080
chr10	111578256	111579158
chr10	112000198	112001043
chr10	112001489	112003217
chr10	112001489	112003217
chr10	115596624	115597449
chr10	116582068	116583524
chr10	116913382	116914449
chr10	116921886	116922710
chr10	117112395	117113182
chr10	117392887	117393788
chr10	117418584	117419341
chr10	117434673	117436123
chr10	117712781	117713875
chr10	117804010	117805239
chr10	117807462	117808703
chr10	117810348	117811495
chr10	117810348	117811495
chr10	117843373	117844621
chr10	117843373	117844621
chr10	117852374	117853399
chr10	117855937	117856916
chr10	117860362	117861765
chr10	117864071	117865505
chr10	117893930	117896735
chr10	117893930	117896735
chr10	117897732	117900073
chr10	117910227	117911008
chr10	117917462	117920063
chr10	117917462	117920063
chr10	117924923	117926443
chr10	117947621	117949300
chr10	117951622	117953663
chr10	117969545	117970468
chr10	117974927	117976822
chr10	117981133	117982048
chr10	118082353	118084454
chr10	118095602	118097005
chr10	118097273	118098703
chr10	118099985	118102458
chr10	118102718	118104323
chr10	118406136	118407415
chr10	118418549	118419865
chr10	118435126	118436297
chr10	118461144	118461965
chr10	118466180	118467347
chr10	118468638	118469785
chr10	118470135	118471415
chr10	118486491	118487257
chr10	118550006	118550874
chr10	118598739	118600744
chr10	118633139	118634240
chr10	118697611	118698455
chr10	118709646	118710603
chr10	118713802	118714829
chr10	118796226	118798112
chr10	118804140	118805377
chr10	118853921	118855285
chr10	118869303	118870926
chr10	118869303	118870926
chr10	118882054	118884691
chr10	118882054	118884691
chr10	119001087	119001879
chr10	119065221	119066297
chr10	119082478	119084287
chr10	119114374	119115284
chr10	119610066	119611125
chr10	120193054	120193893
chr10	120596804	120597876
chr10	120616092	120617449
chr10	120625038	120626005
chr10	120627627	120628699
chr10	120634467	120635217
chr10	120635395	120636861
chr10	120651414	120652669
chr10	120660336	120661421
chr10	120694335	120695267
chr10	120696253	120698063
chr10	120696253	120698063
chr10	120881844	120883101
chr10	121268544	121269379
chr10	121374092	121375874
chr10	121473662	121474693
chr10	122725387	122726774
chr10	122726811	122728998
chr10	122736150	122740126
chr10	122736150	122740126
chr10	122736150	122740126
chr10	122758097	122759012
chr10	122794096	122795112
chr10	122799856	122801276
chr10	122814699	122815812
chr10	122817433	122818501
chr10	125441773	125442499
chr10	125966795	125967536
chr10	125994619	125995387
chr10	126013425	126014247
chr10	126918980	126919709
chr10	127002503	127003525
chr10	127074914	127076718
chr10	127099673	127102259
chr10	127107151	127108352
chr10	127134790	127137552
chr10	127134790	127137552
chr10	127140666	127142711
chr10	127149583	127151945
chr10	127225400	127226550
chr10	127300352	127301321
chr10	127302616	127303854
chr10	127324272	127325053
chr10	127325366	127326587
chr10	127585932	127586711
chr10	127604225	127605661
chr10	127631259	127632470
chr10	127654575	127655883
chr10	127674539	127675395
chr10	128097369	128098398
chr10	128503242	128505564
chr10	128503242	128505564
chr10	128715809	128716973
chr11	3102640	3105817
chr11	3334228	3335351
chr11	3335372	3336487
chr11	3335372	3336487
chr11	3464090	3464826
chr11	4205897	4207092
chr11	4232200	4233333
chr11	4251134	4252077
chr11	4260150	4262599
chr11	4268199	4269202
chr11	4288968	4289953
chr11	5114688	5115582
chr11	5149707	5151372
chr11	5174734	5177845
chr11	5174734	5177845
chr11	5174734	5177845
chr11	5219105	5219961
chr11	5295328	5297258
chr11	5428472	5430582
chr11	5432142	5433121
chr11	5434789	5436155
chr11	5436604	5438269
chr11	5882151	5883317
chr11	5997628	6001258
chr11	5997628	6001258
chr11	6017627	6019269
chr11	6365742	6366586
chr11	6391253	6392170
chr11	6522646	6523932
chr11	6566171	6567064
chr11	6567705	6568546
chr11	6627472	6628439
chr11	6679643	6680822
chr11	6694841	6695885
chr11	7144874	7145801
chr11	8424110	8425205
chr11	9499525	9500393
chr11	9531413	9532238
chr11	11460988	11462809
chr11	11511787	11512722
chr11	11521590	11522594
chr11	11563902	11565285
chr11	11568701	11569992
chr11	11688760	11692300
chr11	11693251	11696520
chr11	11711371	11712316
chr11	11715541	11717295
chr11	11719531	11720236
chr11	11724572	11726915
chr11	11724572	11726915
chr11	11736167	11737502
chr11	11741476	11743138
chr11	11750720	11752110
chr11	11762857	11764256
chr11	11765405	11766922
chr11	11836589	11837580
chr11	14142362	14142996
chr11	16975658	16979542
chr11	16975658	16979542
chr11	16982301	16983678
chr11	16986187	16988575
chr11	16995221	16997984
chr11	17000466	17001621
chr11	17004220	17006421
chr11	19253291	19254565
chr11	19253291	19254565
chr11	19302145	19303133
chr11	19890082	19891387
chr11	19965425	19966424
chr11	19978919	19980005
chr11	19986357	19987874
chr11	19988829	19989815
chr11	20552672	20553474
chr11	21173682	21175615
chr11	21180422	21181311
chr11	21295460	21296127
chr11	21447807	21448538
chr11	21549641	21550510
chr11	21568641	21569929
chr11	22692091	22693912
chr11	22813319	22814860
chr11	22813319	22814860
chr11	22842858	22844223
chr11	22852102	22854309
chr11	23256875	23258130
chr11	23845578	23847153
chr11	24242057	24243435
chr11	24242057	24243435
chr11	26604028	26604908
chr11	26640107	26640978
chr11	30182261	30183968
chr11	30189827	30190597
chr11	30191309	30192475
chr11	30195310	30197055
chr11	32039614	32040317
chr11	32445506	32446199
chr11	32541759	32543631
chr11	32552191	32555625
chr11	32557661	32559452
chr11	32561170	32562380
chr11	32564830	32565917
chr11	32570865	32572164
chr11	32582534	32583730
chr11	33700245	33702791
chr11	33705511	33706345
chr11	33706580	33707465
chr11	33932069	33933446
chr11	33932069	33933446
chr11	33938508	33940091
chr11	34008065	34009220
chr11	34009280	34011237
chr11	34009280	34011237
chr11	34033738	34035310
chr11	34035885	34036798
chr11	34049589	34051411
chr11	34049589	34051411
chr11	34063502	34064720
chr11	34736950	34737644
chr11	34763517	34764237
chr11	34770110	34772802
chr11	34772905	34776545
chr11	34779783	34781660
chr11	35837714	35839671
chr11	35841803	35842447
chr11	43358567	43359239
chr11	43358567	43359239
chr11	43384624	43386033
chr11	43395007	43396138
chr11	44544929	44545742
chr11	44922913	44923729
chr11	46215184	46217260
chr11	46262281	46263952
chr11	46262281	46263952
chr11	46262281	46263952
chr11	46268876	46269956
chr11	46304844	46305674
chr11	46305687	46307491
chr11	46307671	46309637
chr11	46313679	46315428
chr11	46324659	46325499
chr11	46325593	46327595
chr11	46343426	46345153
chr11	46361372	46363226
chr11	46369938	46371131
chr11	46377097	46378037
chr11	46391243	46392155
chr11	46395827	46396923
chr11	46398764	46399794
chr11	46430838	46431558
chr11	46466567	46467410
chr11	48766910	48767737
chr11	48787500	48788408
chr11	48833419	48834638
chr11	48852940	48854930
chr11	48855184	48857466
chr11	48855184	48857466
chr11	49082336	49083779
chr11	49084458	49085778
chr11	49093324	49094630
chr11	49754997	49755810
chr11	49810746	49812534
chr11	49977685	49978827
chr11	49980556	49981986
chr11	49982029	49983361
chr11	49983626	49984484
chr11	49996398	49997722
chr11	50102286	50103565
chr11	50104697	50105979
chr11	50108342	50109646
chr11	50124983	50126080
chr11	50133771	50135059
chr11	50161307	50162959
chr11	50198909	50200294
chr11	50204493	50205447
chr11	50207194	50209524
chr11	50212497	50214029
chr11	51617679	51618673
chr11	51637642	51638571
chr11	51883431	51884393
chr11	51915378	51917087
chr11	51930947	51932231
chr11	51938176	51939666
chr11	52075631	52076970
chr11	52263229	52264234
chr11	52264808	52266663
chr11	52267800	52269104
chr11	52273659	52276161
chr11	52273659	52276161
chr11	52280474	52282127
chr11	52280474	52282127
chr11	52283481	52284649
chr11	52299239	52300355
chr11	52313895	52315234
chr11	52318087	52319750
chr11	52326874	52328487
chr11	52340736	52341682
chr11	52569123	52569831
chr11	52579109	52579867
chr11	53393633	53394404
chr11	53609236	53610434
chr11	53625098	53625828
chr11	53785488	53788084
chr11	53785488	53788084
chr11	53793590	53796350
chr11	53802205	53804843
chr11	53805531	53806966
chr11	53809882	53811233
chr11	53820481	53821528
chr11	53838830	53840369
chr11	53838830	53840369
chr11	53841253	53842733
chr11	53851220	53852559
chr11	54150761	54151856
chr11	54155553	54156561
chr11	54208261	54209181
chr11	54214195	54215364
chr11	54217228	54218187
chr11	54219990	54220896
chr11	54239840	54240491
chr11	54726650	54728910
chr11	54801605	54803236
chr11	54807098	54808647
chr11	54812529	54813527
chr11	54971838	54972796
chr11	54972806	54974367
chr11	55021924	55024076
chr11	55030907	55031919
chr11	55130759	55132451
chr11	55130759	55132451
chr11	55197377	55198490
chr11	55240429	55240991
chr11	57444873	57446192
chr11	57669476	57670107
chr11	57950869	57952217
chr11	57952376	57953318
chr11	57953496	57954277
chr11	57957874	57958880
chr11	57966599	57967161
chr11	58095875	58096799
chr11	58116343	58117226
chr11	58179560	58180128
chr11	58210282	58211601
chr11	58221959	58222749
chr11	58223368	58224892
chr11	58225465	58226199
chr11	58290021	58291004
chr11	58300743	58303120
chr11	58300743	58303120
chr11	58927491	58929033
chr11	58959863	58960794
chr11	59226124	59227452
chr11	59252076	59253088
chr11	59397101	59398509
chr11	59404062	59404916
chr11	59418011	59419363
chr11	59421162	59422531
chr11	59425275	59426703
chr11	60934806	60936236
chr11	61602481	61603492
chr11	62466039	62467434
chr11	62643318	62644589
chr11	62663957	62664961
chr11	62667232	62668297
chr11	62678338	62679380
chr11	62751951	62753575
chr11	62761608	62762515
chr11	63969505	63970312
chr11	63973497	63976191
chr11	63973497	63976191
chr11	63984062	63986189
chr11	63988769	63990783
chr11	63991606	63992643
chr11	64015096	64017124
chr11	64019045	64019896
chr11	64037502	64038356
chr11	64051187	64052093
chr11	64203934	64205113
chr11	67478894	67480989
chr11	67478894	67480989
chr11	67478894	67480989
chr11	67486621	67487403
chr11	67494105	67496590
chr11	67496692	67497520
chr11	67511773	67512826
chr11	67522191	67523413
chr11	67526128	67528070
chr11	67531785	67532969
chr11	67562215	67565557
chr11	67566376	67567334
chr11	67577828	67579732
chr11	67580226	67581388
chr11	67580226	67581388
chr11	67588135	67589586
chr11	67607873	67609051
chr11	67632634	67634526
chr11	68198204	68201820
chr11	68198204	68201820
chr11	68203256	68205900
chr11	68203256	68205900
chr11	68440781	68444486
chr11	68440781	68444486
chr11	68445366	68449008
chr11	68445366	68449008
chr11	68445366	68449008
chr11	68449565	68454087
chr11	68449565	68454087
chr11	68464066	68465869
chr11	68483060	68484102
chr11	68498202	68499550
chr11	68498202	68499550
chr11	68545386	68546592
chr11	68547288	68548207
chr11	68726265	68727322
chr11	68863433	68865422
chr11	69015309	69017143
chr11	69039582	69042024
chr11	69039582	69042024
chr11	69061973	69063985
chr11	69077833	69079426
chr11	69077833	69079426
chr11	69123139	69124689
chr11	69365934	69368870
chr11	69365934	69368870
chr11	69691029	69692952
chr11	69919198	69920543
chr11	70005425	70006094
chr11	70028619	70030723
chr11	70198086	70199236
chr11	70436879	70438363
chr11	70452722	70453783
chr11	70534127	70534860
chr11	70563387	70564242
chr11	70597088	70598102
chr11	70774378	70775342
chr11	70786526	70793279
chr11	70802014	70807401
chr11	70802014	70807401
chr11	70802014	70807401
chr11	70815390	70816533
chr11	70917425	70918561
chr11	70948893	70949564
chr11	71727943	71728686
chr11	71999958	72001268
chr11	71999958	72001268
chr11	72110406	72111263
chr11	72341868	72343060
chr11	72490805	72491706
chr11	72945869	72947581
chr11	72953304	72954687
chr11	73094376	73095275
chr11	73130824	73131662
chr11	73131969	73133603
chr11	74555605	74557040
chr11	74571677	74573714
chr11	74574777	74576672
chr11	74836912	74839824
chr11	74954663	74955860
chr11	74959056	74961002
chr11	74981204	74982018
chr11	75152944	75154877
chr11	75152944	75154877
chr11	75208866	75210159
chr11	75240500	75241459
chr11	75254369	75255972
chr11	75282370	75283858
chr11	75322028	75323149
chr11	75324047	75325213
chr11	75336167	75337885
chr11	75532725	75534201
chr11	75572833	75573917
chr11	75597828	75599086
chr11	75913040	75914722
chr11	75935524	75936597
chr11	75956179	75957535
chr11	75976529	75977396
chr11	76455810	76457735
chr11	76478865	76480489
chr11	76493533	76497024
chr11	76493533	76497024
chr11	76734334	76735200
chr11	76735447	76736546
chr11	76845227	76846511
chr11	76992639	76993575
chr11	77111037	77111756
chr11	77195019	77197245
chr11	77195019	77197245
chr11	77200369	77201289
chr11	77207637	77208572
chr11	77371939	77373124
chr11	77385496	77387151
chr11	77621869	77622694
chr11	77624706	77625893
chr11	77630140	77631024
chr11	77964205	77964999
chr11	78556009	78557994
chr11	78556009	78557994
chr11	78599669	78601761
chr11	78702891	78703597
chr11	78765863	78767054
chr11	78817693	78818656
chr11	78822633	78823757
chr11	78982357	78983718
chr11	79022282	79024203
chr11	79022282	79024203
chr11	79033420	79034829
chr11	79041735	79042648
chr11	79050797	79052067
chr11	79056529	79057673
chr11	79075942	79077264
chr11	79091910	79093411
chr11	79125416	79126442
chr11	79129341	79130588
chr11	79131890	79132795
chr11	79460646	79461359
chr11	79640579	79641781
chr11	79644547	79645828
chr11	79652275	79653986
chr11	79658037	79659313
chr11	79670415	79671209
chr11	80075609	80076178
chr11	80086644	80087523
chr11	80503982	80505664
chr11	80503982	80505664
chr11	80507702	80509583
chr11	80575470	80576382
chr11	82182984	82184031
chr11	82203419	82204187
chr11	82205166	82206853
chr11	82214258	82215139
chr11	82746013	82747562
chr11	83077571	83080465
chr11	83077571	83080465
chr11	83223782	83224883
chr11	83532688	83540011
chr11	83532688	83540011
chr11	83532688	83540011
chr11	83540221	83542185
chr11	83543501	83545197
chr11	83549726	83551317
chr11	83555974	83559147
chr11	83559511	83561440
chr11	83568611	83570712
chr11	83604424	83606201
chr11	83625268	83626293
chr11	83627962	83631759
chr11	83631793	83633399
chr11	83636218	83638169
chr11	83638541	83642478
chr11	83638541	83642478
chr11	83654204	83656136
chr11	83656386	83659474
chr11	83656386	83659474
chr11	83663270	83664973
chr11	83665101	83667074
chr11	83728482	83729374
chr11	84913144	84913794
chr11	85126419	85127347
chr11	85323678	85324844
chr11	85453636	85454617
chr11	85644417	85645320
chr11	85713154	85714113
chr11	85925188	85925853
chr11	85929342	85930244
chr11	86428667	86429625
chr11	86431994	86433011
chr11	86436617	86437336
chr11	86586134	86588570
chr11	86589905	86590603
chr11	86590923	86594377
chr11	86590923	86594377
chr11	86606028	86607447
chr11	86623729	86625069
chr11	86827267	86828153
chr11	86828222	86828920
chr11	86836162	86837025
chr11	87441471	87443012
chr11	87441471	87443012
chr11	87443314	87443926
chr11	87447810	87448396
chr11	87448702	87449586
chr11	87453617	87454479
chr11	87462401	87463107
chr11	87471482	87471761
chr11	87583414	87584405
chr11	87744253	87747081
chr11	87744253	87747081
chr11	87747703	87752765
chr11	87965056	87965946
chr11	88107154	88108276
chr11	88110005	88110536
chr11	88114562	88116044
chr11	88116363	88118157
chr11	88116363	88118157
chr11	88131547	88132687
chr11	88132821	88133708
chr11	88144836	88146311
chr11	88160427	88162482
chr11	88233739	88234624
chr11	88993307	88994132
chr11	89023911	89024915
chr11	89061350	89061997
chr11	89100339	89101486
chr11	90223859	90225852
chr11	90227137	90228227
chr11	90238316	90239672
chr11	90239680	90241328
chr11	90251566	90252483
chr11	90256828	90258234
chr11	90263242	90264961
chr11	94591168	94592117
chr11	95000221	95000989
chr11	95259055	95260242
chr11	95337142	95338841
chr11	95352021	95357782
chr11	95352021	95357782
chr11	95352021	95357782
chr11	95352021	95357782
chr11	95688125	95689673
chr11	95713272	95715122
chr11	95748077	95749048
chr11	95833763	95836094
chr11	96441088	96442293
chr11	96454667	96457031
chr11	96464778	96465790
chr11	96466412	96467400
chr11	96527566	96528299
chr11	96653660	96654422
chr11	96666511	96667625
chr11	96909807	96910594
chr11	96912383	96913451
chr11	96966288	96968197
chr11	96987387	96988881
[truncated: 8,247 more rows]

## Sheet: ATAC 1kb windows ranked me1_me3
chromosome	start	end	width	strand	originalOrder	ClusterID	SortingOrder	FinalOrder	RowMeans (me1:me3)
chr1	138289756	138290755	1000	*	5028	NA	1	1	6.3445
chr11	83654327	83655326	1000	*	722	NA	2	2	6.3117
chr15	60136310	60137309	1000	*	1	NA	3	3	6.2174
chr7	127293243	127294242	1000	*	20	NA	4	4	6.12807
chr6	65593623	65594622	1000	*	10	NA	5	5	6.1168
chr17	52160090	52161089	1000	*	78	NA	6	6	6.1063
chr15	60137012	60138011	1000	*	2	NA	7	7	6.08395
chr10	19171450	19172449	1000	*	1029	NA	8	8	5.9844
chr10	8128262	8129261	1000	*	7	NA	9	9	5.92946
chr7	80505505	80506504	1000	*	203	NA	10	10	5.86684
chr17	52160594	52161593	1000	*	11	NA	11	11	5.77723
chr2	13407059	13408058	1000	*	677	NA	12	12	5.74221
chr9	32910256	32911255	1000	*	94	NA	13	13	5.72364
chr11	83636470	83637469	1000	*	1252	NA	14	14	5.69782
chr15	60102296	60103295	1000	*	186	NA	15	15	5.68849
chr9	32924684	32925683	1000	*	12	NA	16	16	5.63911
chr8	123038097	123039096	1000	*	362	NA	17	17	5.63013
chr1	138124920	138125919	1000	*	24	NA	18	18	5.60014
chr10	8121491	8122490	1000	*	6	NA	19	19	5.55248
chr6	129818873	129819872	1000	*	37	NA	20	20	5.54162
chr1	106599186	106600185	1000	*	29	NA	21	21	5.45868
chr1	88642740	88643739	1000	*	160	NA	22	22	5.45266
chr1	138291304	138292303	1000	*	32	NA	23	23	5.4215
chr15	60101557	60102556	1000	*	373	NA	24	24	5.41289
chr19	10987200	10988199	1000	*	225	NA	25	25	5.37047
chr1	194995973	194996972	1000	*	25	NA	26	26	5.34852
chr10	96348992	96349991	1000	*	3	NA	27	27	5.32911
chr12	25393990	25394989	1000	*	596	NA	28	28	5.31837
chr2	79001018	79002017	1000	*	669	NA	29	29	5.31753
chr1	138288464	138289463	1000	*	41	NA	30	30	5.30905
chr4	134098445	134099444	1000	*	9596	NA	31	31	5.28457
chr12	93226563	93227562	1000	*	166	NA	32	32	5.2728
chr15	60101116	60102115	1000	*	213	NA	33	33	5.26532
chr13	85498881	85499880	1000	*	284	NA	34	34	5.25508
chr10	19064710	19065709	1000	*	87	NA	35	35	5.23523
chr1	164956731	164957730	1000	*	5	NA	36	36	5.22217
chr16	49771228	49772227	1000	*	6096	NA	37	37	5.17267
chr19	10988267	10989266	1000	*	75	NA	38	38	5.15692
chr11	11520600	11521599	1000	*	898	NA	39	39	5.14064
chr1	40503206	40504205	1000	*	113	NA	40	40	5.1331
chr16	49772046	49773045	1000	*	300	NA	41	41	5.12118
chr5	21248719	21249718	1000	*	18	NA	42	42	5.10494
chr12	115165225	115166224	1000	*	829	NA	43	43	5.09057
chr9	85121892	85122891	1000	*	97	NA	44	44	5.08806
chr9	33010790	33011789	1000	*	608	NA	45	45	5.07388
chr10	80681681	80682680	1000	*	285	NA	46	46	5.07089
chr1	138322493	138323492	1000	*	2066	NA	47	47	5.06587
chr10	8065421	8066420	1000	*	200	NA	48	48	5.06205
chr16	58546894	58547893	1000	*	15	NA	49	49	5.06197
chr5	21253505	21254504	1000	*	14	NA	50	50	5.02633
chr17	84334744	84335743	1000	*	68	NA	51	51	5.0135
chr1	51585971	51586970	1000	*	34	NA	52	52	4.98531
chr1	161775864	161776863	1000	*	145	NA	53	53	4.98458
chr9	92289127	92290126	1000	*	2912	NA	54	54	4.984
chr19	29399484	29400483	1000	*	1790	NA	55	55	4.97827
chr2	79120634	79121633	1000	*	9725	NA	56	56	4.9445
chr19	11393998	11394997	1000	*	2702	NA	57	57	4.92296
chr10	119083010	119084009	1000	*	6253	NA	58	58	4.92263
chr1	52019454	52020453	1000	*	32454	NA	59	59	4.9199
chr6	130287831	130288830	1000	*	941	NA	60	60	4.91974
chr16	49772836	49773835	1000	*	187	NA	61	61	4.91426
chr10	8197180	8198179	1000	*	45	NA	62	62	4.91142
chr7	66184965	66185964	1000	*	750	NA	63	63	4.88672
chr12	25338526	25339525	1000	*	484	NA	64	64	4.86885
chr2	78994904	78995903	1000	*	54	NA	65	65	4.86169
chr18	79300263	79301262	1000	*	1144	NA	66	66	4.8578
chr6	136467148	136468147	1000	*	299	NA	67	67	4.85385
chr10	96377419	96378418	1000	*	316	NA	68	68	4.85149
chr9	92378867	92379866	1000	*	112	NA	69	69	4.83829
chr11	5436955	5437954	1000	*	647	NA	70	70	4.83059
chr1	66813886	66814885	1000	*	393	NA	71	71	4.82461
chr1	138302464	138303463	1000	*	44	NA	72	72	4.81677
chr1	53797050	53798049	1000	*	1085	NA	73	73	4.81336
chr2	13408460	13409459	1000	*	76	NA	74	74	4.80834
chr4	59339616	59340615	1000	*	9	NA	75	75	4.77967
chr4	101184856	101185855	1000	*	195	NA	76	76	4.76783
chr9	92385467	92386466	1000	*	163	NA	77	77	4.76659
chr2	181410716	181411715	1000	*	353	NA	78	78	4.76127
chr12	25228368	25229367	1000	*	635	NA	79	79	4.76092
chr11	83658597	83659596	1000	*	47	NA	80	80	4.76049
chr17	84330133	84331132	1000	*	1185	NA	81	81	4.75762
chr11	49082217	49083216	1000	*	151	NA	82	82	4.74918
chr7	66300850	66301849	1000	*	22	NA	83	83	4.7452
chr7	142397580	142398579	1000	*	615	NA	84	84	4.74198
chr16	92868676	92869675	1000	*	65	NA	85	85	4.72637
chr9	32616893	32617892	1000	*	158	NA	86	86	4.72409
chr9	32931235	32932234	1000	*	2569	NA	87	87	4.72123
chr1	138146072	138147071	1000	*	906	NA	88	88	4.71812
chr11	86430025	86431024	1000	*	537	NA	89	89	4.7053
chr1	161763485	161764484	1000	*	133	NA	90	90	4.70061
chr16	58545876	58546875	1000	*	1358	NA	91	91	4.69875
chr4	120973003	120974002	1000	*	177	NA	92	92	4.69564
chr7	101635715	101636714	1000	*	846	NA	93	93	4.69447
chr11	11519663	11520662	1000	*	848	NA	94	94	4.69352
chr6	129821946	129822945	1000	*	40	NA	95	95	4.69085
chr4	59279475	59280474	1000	*	147	NA	96	96	4.68837
chr13	114886058	114887057	1000	*	8	NA	97	97	4.68271
chr6	128767851	128768850	1000	*	16	NA	98	98	4.6771
chr3	19319189	19320188	1000	*	518	NA	99	99	4.67245
chr16	42921588	42922587	1000	*	340	NA	100	100	4.66581
chr10	19170251	19171250	1000	*	224	NA	101	101	4.65743
chr11	5433750	5434749	1000	*	5303	NA	102	102	4.62951
chr3	106464474	106465473	1000	*	4511	NA	103	103	4.62357
chr9	33003461	33004460	1000	*	810	NA	104	104	4.60331
chr3	106463582	106464581	1000	*	82	NA	105	105	4.60306
chr14	54147335	54148334	1000	*	190	NA	106	106	4.59519
chr6	30346801	30347800	1000	*	553	NA	107	107	4.59136
chr10	6956101	6957100	1000	*	13678	NA	108	108	4.58742
chr15	60130608	60131607	1000	*	121	NA	109	109	4.57311
chr4	59338582	59339581	1000	*	2109	NA	110	110	4.56837
chr10	96273699	96274698	1000	*	8167	NA	111	111	4.56575
chr16	58547581	58548580	1000	*	1215	NA	112	112	4.54238
chr16	92820013	92821012	1000	*	277	NA	113	113	4.54014
chr14	27344863	27345862	1000	*	11100	NA	114	114	4.53406
chr5	107647291	107648290	1000	*	248	NA	115	115	4.52515
chr6	54935395	54936394	1000	*	860	NA	116	116	4.52346
chr6	129750999	129751998	1000	*	1726	NA	117	117	4.51816
chr13	95712484	95713483	1000	*	6993	NA	118	118	4.51562
chr10	45022465	45023464	1000	*	137	NA	119	119	4.51155
chr15	66788960	66789959	1000	*	791	NA	120	120	4.50846
chr16	52090737	52091736	1000	*	10530	NA	121	121	4.50572
chr2	45017612	45018611	1000	*	718	NA	122	122	4.50124
chr7	58824417	58825416	1000	*	2150	NA	123	123	4.4984
chr10	118468722	118469721	1000	*	1469	NA	124	124	4.49809
chr15	66851323	66852322	1000	*	198	NA	125	125	4.49779
chr11	77385760	77386759	1000	*	22333	NA	126	126	4.48825
chr6	129817370	129818369	1000	*	769	NA	127	127	4.4869
chr8	128647380	128648379	1000	*	1614	NA	128	128	4.48551
chr16	24628738	24629737	1000	*	20178	NA	129	129	4.48235
chr1	85686754	85687753	1000	*	3344	NA	130	130	4.48046
chr7	4323020	4324019	1000	*	469	NA	131	131	4.48031
chr16	92868105	92869104	1000	*	183	NA	132	132	4.47798
chr11	11723427	11724426	1000	*	250	NA	133	133	4.47393
chr9	64796954	64797953	1000	*	10211	NA	134	134	4.46579
chr12	93225869	93226868	1000	*	337	NA	135	135	4.4494
chr7	128137520	128138519	1000	*	438	NA	136	136	4.44773
chr13	114911501	114912500	1000	*	223	NA	137	137	4.44656
chr11	86428625	86429624	1000	*	10494	NA	138	138	4.44639
chr6	130034830	130035829	1000	*	171	NA	139	139	4.44575
chr12	25364913	25365912	1000	*	566	NA	140	140	4.44403
chr6	130136097	130137096	1000	*	4831	NA	141	141	4.44191
chr14	70274176	70275175	1000	*	379	NA	142	142	4.44099
chr6	129822657	129823656	1000	*	283	NA	143	143	4.43632
chr6	129748898	129749897	1000	*	53	NA	144	144	4.43044
chr5	64447502	64448501	1000	*	2055	NA	145	145	4.42555
chr2	143839434	143840433	1000	*	178	NA	146	146	4.42059
chr8	81635983	81636982	1000	*	1456	NA	147	147	4.41218
chr13	85476237	85477236	1000	*	79	NA	148	148	4.40947
chr17	84335724	84336723	1000	*	539	NA	149	149	4.40793
chr9	42108132	42109131	1000	*	1098	NA	150	150	4.40649
chr4	59247659	59248658	1000	*	155	NA	151	151	4.40617
chr11	74961607	74962606	1000	*	697	NA	152	152	4.40517
chr15	61448120	61449119	1000	*	304	NA	153	153	4.40349
chr6	130288293	130289292	1000	*	1211	NA	154	154	4.39718
chr15	60097382	60098381	1000	*	28	NA	155	155	4.39308
chr7	66183667	66184666	1000	*	536	NA	156	156	4.39161
chr9	124055944	124056943	1000	*	329	NA	157	157	4.3872
chr1	138298436	138299435	1000	*	140	NA	158	158	4.3823
chr9	32530653	32531652	1000	*	11238	NA	159	159	4.38084
chr2	48472519	48473518	1000	*	258	NA	160	160	4.37876
chr10	96349527	96350526	1000	*	23	NA	161	161	4.37874
chr14	106035004	106036003	1000	*	16071	NA	162	162	4.37798
chr1	194993620	194994619	1000	*	279	NA	163	163	4.37711
chr6	130031303	130032302	1000	*	11008	NA	164	164	4.37447
chr6	136497460	136498459	1000	*	70	NA	165	165	4.37014
chr15	60130209	60131208	1000	*	547	NA	166	166	4.36831
chr6	130311514	130312513	1000	*	4307	NA	167	167	4.36331
chr12	76307838	76308837	1000	*	1352	NA	168	168	4.36271
chr13	95711650	95712649	1000	*	760	NA	169	169	4.36038
chr9	92383956	92384955	1000	*	3407	NA	170	170	4.35698
chr12	25339454	25340453	1000	*	400	NA	171	171	4.35565
chr1	92059502	92060501	1000	*	117	NA	172	172	4.34494
chr5	21413961	21414960	1000	*	351	NA	173	173	4.34216
chr10	96378568	96379567	1000	*	617	NA	174	174	4.34009
chr5	139303249	139304248	1000	*	7802	NA	175	175	4.33868
chr3	52568588	52569587	1000	*	2695	NA	176	176	4.33833
chr5	64498493	64499492	1000	*	354	NA	177	177	4.33655
chr1	161779024	161780023	1000	*	8523	NA	178	178	4.33444
chr9	124114594	124115593	1000	*	11275	NA	179	179	4.33002
chr10	53772781	53773780	1000	*	43	NA	180	180	4.32979
chr10	96351792	96352791	1000	*	313	NA	181	181	4.32896
chr2	79050372	79051371	1000	*	1387	NA	182	182	4.32833
chr12	21456867	21457866	1000	*	445	NA	183	183	4.32734
chr11	49082859	49083858	1000	*	1094	NA	184	184	4.325
chr19	60948680	60949679	1000	*	485	NA	185	185	4.32281
chr4	95196269	95197268	1000	*	5865	NA	186	186	4.3223
chr9	33005889	33006888	1000	*	193	NA	187	187	4.32131
chr17	52168123	52169122	1000	*	1682	NA	188	188	4.32045
chr4	7595869	7596868	1000	*	9556	NA	189	189	4.31638
chr1	127303703	127304702	1000	*	2260	NA	190	190	4.31362
chr17	84329263	84330262	1000	*	17	NA	191	191	4.31299
chr12	92672027	92673026	1000	*	641	NA	192	192	4.31266
chr19	53407015	53408014	1000	*	1829	NA	193	193	4.31085
chr9	84774465	84775464	1000	*	174	NA	194	194	4.3073
chr10	39521568	39522567	1000	*	643	NA	195	195	4.30591
chr7	80506379	80507378	1000	*	173	NA	196	196	4.30459
chr16	91442437	91443436	1000	*	10588	NA	197	197	4.30232
chr11	64018940	64019939	1000	*	391	NA	198	198	4.29133
chr1	165710771	165711770	1000	*	3221	NA	199	199	4.28936
chr10	117920717	117921716	1000	*	80	NA	200	200	4.28788
chr2	78977674	78978673	1000	*	5125	NA	201	201	4.28677
chr4	133677131	133678130	1000	*	2685	NA	202	202	4.28187
chr2	45017017	45018016	1000	*	4951	NA	203	203	4.27647
chr11	77200408	77201407	1000	*	1442	NA	204	204	4.27581
chr1	127302484	127303483	1000	*	2098	NA	205	205	4.27512
chr11	11513014	11514013	1000	*	201	NA	206	206	4.27466
chr9	85118135	85119134	1000	*	84	NA	207	207	4.26912
chr12	115258388	115259387	1000	*	95	NA	208	208	4.26661
chr1	164078180	164079179	1000	*	11152	NA	209	209	4.26105
chr3	136726771	136727770	1000	*	1222	NA	210	210	4.25956
chr13	43235674	43236673	1000	*	1327	NA	211	211	4.25611
chr15	66823258	66824257	1000	*	1180	NA	212	212	4.2559
chr5	72760689	72761688	1000	*	336	NA	213	213	4.2553
chr10	96871507	96872506	1000	*	1203	NA	214	214	4.24692
chr11	83657260	83658259	1000	*	12063	NA	215	215	4.24323
chr9	32932676	32933675	1000	*	489	NA	216	216	4.24175
chr19	53405970	53406969	1000	*	1939	NA	217	217	4.24129
chr13	20094381	20095380	1000	*	972	NA	218	218	4.24117
chr10	21234972	21235971	1000	*	6020	NA	219	219	4.23816
chr10	53772145	53773144	1000	*	754	NA	220	220	4.23739
chr10	44450474	44451473	1000	*	355	NA	221	221	4.23473
chr6	128735830	128736829	1000	*	138	NA	222	222	4.23233
chr10	8122837	8123836	1000	*	1571	NA	223	223	4.22995
chr14	27243443	27244442	1000	*	3017	NA	224	224	4.22492
chr10	19066438	19067437	1000	*	46	NA	225	225	4.22324
chr10	117920228	117921227	1000	*	209	NA	226	226	4.22292
chr11	78600207	78601206	1000	*	72	NA	227	227	4.22185
chr1	138187762	138188761	1000	*	19981	NA	228	228	4.22121
chr9	32915227	32916226	1000	*	2798	NA	229	229	4.22065
chr6	48803101	48804100	1000	*	699	NA	230	230	4.21734
chr12	25392745	25393744	1000	*	446	NA	231	231	4.21707
chr11	50104904	50105903	1000	*	361	NA	232	232	4.21542
chr6	50519645	50520644	1000	*	276	NA	233	233	4.2152
chr5	8676486	8677485	1000	*	270	NA	234	234	4.211
chr19	53407999	53408998	1000	*	236	NA	235	235	4.21032
chr16	49798406	49799405	1000	*	4285	NA	236	236	4.20794
chr1	88644115	88645114	1000	*	520	NA	237	237	4.20713
chr9	32911683	32912682	1000	*	35	NA	238	238	4.20599
chr13	85509543	85510542	1000	*	8227	NA	239	239	4.20511
chr9	124043718	124044717	1000	*	7879	NA	240	240	4.20391
chr10	41978603	41979602	1000	*	23371	NA	241	241	4.20336
chr8	81701771	81702770	1000	*	534	NA	242	242	4.20201
chr6	130315098	130316097	1000	*	8693	NA	243	243	4.19852
chr1	171627544	171628543	1000	*	93	NA	244	244	4.19697
chr2	60842711	60843710	1000	*	1082	NA	245	245	4.19671
chr10	19516325	19517324	1000	*	36	NA	246	246	4.19662
chr16	24154398	24155397	1000	*	66	NA	247	247	4.19403
chr11	50108395	50109394	1000	*	4090	NA	248	248	4.19389
chr16	42920683	42921682	1000	*	444	NA	249	249	4.19359
chr3	142549944	142550943	1000	*	3222	NA	250	250	4.19321
chr10	119084687	119085686	1000	*	312	NA	251	251	4.19275
chr3	60411857	60412856	1000	*	254	NA	252	252	4.1912
chr1	60755304	60756303	1000	*	474	NA	253	253	4.18536
chr9	32530938	32531937	1000	*	25576	NA	254	254	4.18025
chr9	65533560	65534559	1000	*	410	NA	255	255	4.18022
chr1	127319512	127320511	1000	*	10671	NA	256	256	4.17984
chr1	40504221	40505220	1000	*	298	NA	257	257	4.17968
chr6	130286625	130287624	1000	*	586	NA	258	258	4.17954
chr12	73594953	73595952	1000	*	129	NA	259	259	4.17649
chr2	29669062	29670061	1000	*	399	NA	260	260	4.17531
chr2	78980589	78981588	1000	*	460	NA	261	261	4.17129
chr10	39519006	39520005	1000	*	932	NA	262	262	4.17097
chr9	64797729	64798728	1000	*	74	NA	263	263	4.16369
chr8	54443958	54444957	1000	*	5431	NA	264	264	4.16292
chr2	155552736	155553735	1000	*	1660	NA	265	265	4.15954
chr1	85679734	85680733	1000	*	453	NA	266	266	4.15806
chr9	123931521	123932520	1000	*	3444	NA	267	267	4.15691
chr2	48473492	48474491	1000	*	786	NA	268	268	4.15603
chr11	117317435	117318434	1000	*	2507	NA	269	269	4.14972
chr7	90135121	90136120	1000	*	447	NA	270	270	4.14691
chr13	30819634	30820633	1000	*	1050	NA	271	271	4.14688
chr9	124057153	124058152	1000	*	3558	NA	272	272	4.14401
chr19	41335348	41336347	1000	*	1260	NA	273	273	4.14381
chr16	91445270	91446269	1000	*	525	NA	274	274	4.13868
chr17	84328270	84329269	1000	*	771	NA	275	275	4.1386
chr11	83560100	83561099	1000	*	2167	NA	276	276	4.1383
chr6	129283050	129284049	1000	*	105	NA	277	277	4.13453
chr16	42918074	42919073	1000	*	288	NA	278	278	4.13429
chr14	56292883	56293882	1000	*	465	NA	279	279	4.13374
chr11	11519127	11520126	1000	*	3012	NA	280	280	4.13222
chr17	84332391	84333390	1000	*	1570	NA	281	281	4.1314
chr13	114902122	114903121	1000	*	1946	NA	282	282	4.13021
chr2	79004574	79005573	1000	*	9159	NA	283	283	4.12984
chr8	120762986	120763985	1000	*	55	NA	284	284	4.12931
chr11	11762931	11763930	1000	*	1696	NA	285	285	4.12929
chr1	53844785	53845784	1000	*	1498	NA	286	286	4.12854
chr1	87875660	87876659	1000	*	732	NA	287	287	4.12729
chr13	33065802	33066801	1000	*	238	NA	288	288	4.12558
chr14	66218404	66219403	1000	*	592	NA	289	289	4.12524
chr19	41330116	41331115	1000	*	13908	NA	290	290	4.12501
chr3	79183031	79184030	1000	*	257	NA	291	291	4.12356
chr6	142560810	142561809	1000	*	5228	NA	292	292	4.12296
chr6	41556006	41557005	1000	*	654	NA	293	293	4.12272
chr11	49980681	49981680	1000	*	1982	NA	294	294	4.11962
chr7	90344483	90345482	1000	*	2135	NA	295	295	4.11691
chr16	91452024	91453023	1000	*	402	NA	296	296	4.11515
chr14	60131301	60132300	1000	*	212	NA	297	297	4.11479
chr9	92287956	92288955	1000	*	5747	NA	298	298	4.10606
chr6	129405778	129406777	1000	*	4519	NA	299	299	4.10564
chr1	80409436	80410435	1000	*	91	NA	300	300	4.10534
chr16	44356113	44357112	1000	*	398	NA	301	301	4.1048
chr9	45241048	45242047	1000	*	7332	NA	302	302	4.10404
chr6	128762409	128763408	1000	*	1523	NA	303	303	4.10375
chr7	66195478	66196477	1000	*	69	NA	304	304	4.10363
chr3	61407619	61408618	1000	*	60	NA	305	305	4.10306
chr2	45187261	45188260	1000	*	3610	NA	306	306	4.10267
chr9	85123391	85124390	1000	*	947	NA	307	307	4.10247
chr9	124100084	124101083	1000	*	12772	NA	308	308	4.1019
chr7	66200425	66201424	1000	*	481	NA	309	309	4.09604
chr6	130339999	130340998	1000	*	2406	NA	310	310	4.09562
chr7	101466081	101467080	1000	*	5887	NA	311	311	4.0945
chr6	129609474	129610473	1000	*	2029	NA	312	312	4.09374
chr1	138303592	138304591	1000	*	819	NA	313	313	4.09171
chr10	118097547	118098546	1000	*	550	NA	314	314	4.0886
chr9	92376832	92377831	1000	*	651	NA	315	315	4.08753
chr9	61669508	61670507	1000	*	1817	NA	316	316	4.08617
chr2	127312462	127313461	1000	*	1932	NA	317	317	4.08526
chr7	128158417	128159416	1000	*	7079	NA	318	318	4.08297
chr10	39519890	39520889	1000	*	2297	NA	319	319	4.08252
chr10	41980064	41981063	1000	*	4897	NA	320	320	4.0744
chr6	41548844	41549843	1000	*	1494	NA	321	321	4.07335
chr10	98774279	98775278	1000	*	516	NA	322	322	4.07189
chr10	39484599	39485598	1000	*	386	NA	323	323	4.06969
chr11	118143984	118144983	1000	*	942	NA	324	324	4.06853
chr4	59280786	59281785	1000	*	471	NA	325	325	4.0649
chr9	65550614	65551613	1000	*	2382	NA	326	326	4.0614
chr1	164079594	164080593	1000	*	4887	NA	327	327	4.05849
chr2	79004142	79005141	1000	*	1511	NA	328	328	4.0576
chr7	64045931	64046930	1000	*	222	NA	329	329	4.05581
chr16	52129218	52130217	1000	*	6236	NA	330	330	4.05534
chr4	59282725	59283724	1000	*	676	NA	331	331	4.05477
chr10	88426807	88427806	1000	*	19	NA	332	332	4.05443
chr2	103651671	103652670	1000	*	218	NA	333	333	4.05148
chr3	69156116	69157115	1000	*	563	NA	334	334	4.05131
chr19	20409398	20410397	1000	*	3460	NA	335	335	4.05093
chr8	57407649	57408648	1000	*	1128	NA	336	336	4.04782
chr14	70795685	70796684	1000	*	3836	NA	337	337	4.04651
chr12	89724247	89725246	1000	*	472	NA	338	338	4.04536
chr6	41740975	41741974	1000	*	4188	NA	339	339	4.04527
chr6	128627411	128628410	1000	*	1520	NA	340	340	4.04376
chr5	107648517	107649516	1000	*	6791	NA	341	341	4.04321
chr12	25363780	25364779	1000	*	275	NA	342	342	4.0427
chr1	161778338	161779337	1000	*	2416	NA	343	343	4.04252
chr6	130106208	130107207	1000	*	3113	NA	344	344	4.03996
chr10	88426546	88427545	1000	*	4	NA	345	345	4.03747
chr12	115802281	115803280	1000	*	1186	NA	346	346	4.03648
chr10	96373676	96374675	1000	*	856	NA	347	347	4.03642
chr13	43245961	43246960	1000	*	126	NA	348	348	4.03533
chr9	61668029	61669028	1000	*	513	NA	349	349	4.03234
chr14	106210018	106211017	1000	*	56	NA	350	350	4.03227
chr5	62573828	62574827	1000	*	4016	NA	351	351	4.03167
chr8	106056383	106057382	1000	*	801	NA	352	352	4.03012
chr9	33080062	33081061	1000	*	6337	NA	353	353	4.02939
chr18	79297462	79298461	1000	*	523	NA	354	354	4.0286
chr3	105783238	105784237	1000	*	1008	NA	355	355	4.02546
chr10	68199243	68200242	1000	*	2074	NA	356	356	4.0213
chr13	43244852	43245851	1000	*	1311	NA	357	357	4.02127
chr5	21213228	21214227	1000	*	3441	NA	358	358	4.01986
chr6	129218589	129219588	1000	*	935	NA	359	359	4.01888
chr1	138584503	138585502	1000	*	211	NA	360	360	4.01748
chr10	118883691	118884690	1000	*	587	NA	361	361	4.01143
chr9	44175352	44176351	1000	*	14979	NA	362	362	4.01011
chr14	54220379	54221378	1000	*	1138	NA	363	363	4.00865
chr18	4294877	4295876	1000	*	7227	NA	364	364	4.00791
chr1	170270306	170271305	1000	*	1130	NA	365	365	4.00325
chr5	21370087	21371086	1000	*	61	NA	366	366	4.00202
chr16	64800618	64801617	1000	*	214	NA	367	367	4.00096
chr14	102809648	102810647	1000	*	782	NA	368	368	4.0003
chr19	21897195	21898194	1000	*	15919	NA	369	369	3.99985
chr8	72208214	72209213	1000	*	5082	NA	370	370	3.99731
chr9	123933024	123934023	1000	*	709	NA	371	371	3.99588
chr10	75299460	75300459	1000	*	8053	NA	372	372	3.99399
chr4	40840141	40841140	1000	*	1383	NA	373	373	3.99384
chr11	46391133	46392132	1000	*	1872	NA	374	374	3.99367
chr9	14295810	14296809	1000	*	3543	NA	375	375	3.99313
chr5	64485575	64486574	1000	*	4693	NA	376	376	3.99257
chr6	136516528	136517527	1000	*	3994	NA	377	377	3.98726
chr6	41551377	41552376	1000	*	159	NA	378	378	3.98522
chr16	55950088	55951087	1000	*	181	NA	379	379	3.98359
chr12	89741774	89742773	1000	*	122	NA	380	380	3.98284
chr16	17012320	17013319	1000	*	118	NA	381	381	3.98235
chr15	66813762	66814761	1000	*	623	NA	382	382	3.98223
chr6	128769123	128770122	1000	*	2206	NA	383	383	3.9803
chr6	8641378	8642377	1000	*	306	NA	384	384	3.97916
chr11	50104483	50105482	1000	*	1135	NA	385	385	3.97846
chr2	166630181	166631180	1000	*	661	NA	386	386	3.97648
chr2	78995580	78996579	1000	*	1376	NA	387	387	3.97641
chr4	7755372	7756371	1000	*	1845	NA	388	388	3.97448
chr6	130135395	130136394	1000	*	162	NA	389	389	3.97235
chr1	88641591	88642590	1000	*	282	NA	390	390	3.97192
chr10	117918074	117919073	1000	*	2402	NA	391	391	3.97163
chr6	129575061	129576060	1000	*	6886	NA	392	392	3.97037
chr11	46362030	46363029	1000	*	107	NA	393	393	3.9695
chr5	64474851	64475850	1000	*	1161	NA	394	394	3.96928
chr1	39749291	39750290	1000	*	730	NA	395	395	3.9671
chr1	161791693	161792692	1000	*	302	NA	396	396	3.96529
chr8	54420016	54421015	1000	*	12050	NA	397	397	3.96499
chr3	52877975	52878974	1000	*	16851	NA	398	398	3.96404
chr14	106209146	106210145	1000	*	8237	NA	399	399	3.96259
chr4	32148650	32149649	1000	*	5223	NA	400	400	3.96121
chr3	146783320	146784319	1000	*	292	NA	401	401	3.96109
chr12	82209496	82210495	1000	*	1484	NA	402	402	3.96018
chr9	61670703	61671702	1000	*	249	NA	403	403	3.95996
chr3	106995902	106996901	1000	*	2110	NA	404	404	3.95981
chr15	78515548	78516547	1000	*	385	NA	405	405	3.95978
chr11	108270994	108271993	1000	*	4806	NA	406	406	3.95746
chr6	67348728	67349727	1000	*	480	NA	407	407	3.95558
chr5	38906245	38907244	1000	*	1272	NA	408	408	3.95489
chr4	135018179	135019178	1000	*	642	NA	409	409	3.95483
chr2	11159307	11160306	1000	*	2125	NA	410	410	3.95422
chr5	21256830	21257829	1000	*	494	NA	411	411	3.95273
chr13	85504672	85505671	1000	*	4740	NA	412	412	3.95178
chr3	19317334	19318333	1000	*	4463	NA	413	413	3.9502
chr17	51891416	51892415	1000	*	2030	NA	414	414	3.94995
chr14	25523236	25524235	1000	*	387	NA	415	415	3.94747
chr5	8677208	8678207	1000	*	3746	NA	416	416	3.9468
chr2	13413291	13414290	1000	*	17646	NA	417	417	3.94646
chr7	142352221	142353220	1000	*	434	NA	418	418	3.94376
chr11	5435177	5436176	1000	*	7941	NA	419	419	3.94339
chr3	79193996	79194995	1000	*	1818	NA	420	420	3.94329
chr3	103397240	103398239	1000	*	3156	NA	421	421	3.93978
chr11	98512608	98513607	1000	*	612	NA	422	422	3.93849
chr3	60411465	60412464	1000	*	227	NA	423	423	3.93781
chr2	79126043	79127042	1000	*	535	NA	424	424	3.93765
chr16	92786055	92787054	1000	*	77	NA	425	425	3.93752
chr5	20930938	20931937	1000	*	388	NA	426	426	3.93617
chr15	60129711	60130710	1000	*	2061	NA	427	427	3.93465
chr13	30820292	30821291	1000	*	1583	NA	428	428	3.93328
chr2	166752717	166753716	1000	*	73	NA	429	429	3.93226
chr1	182357708	182358707	1000	*	16482	NA	430	430	3.93202
chr14	70273299	70274298	1000	*	8296	NA	431	431	3.93123
chr13	33067555	33068554	1000	*	4124	NA	432	432	3.93052
chr4	134919447	134920446	1000	*	2975	NA	433	433	3.92859
chr5	8673311	8674310	1000	*	426	NA	434	434	3.9283
chr16	77094931	77095930	1000	*	10910	NA	435	435	3.92803
chr7	127278063	127279062	1000	*	3547	NA	436	436	3.92766
chr9	64814400	64815399	1000	*	4112	NA	437	437	3.92696
chr1	161776987	161777986	1000	*	38	NA	438	438	3.92577
chr10	21906720	21907719	1000	*	124	NA	439	439	3.92473
chr7	75686067	75687066	1000	*	13125	NA	440	440	3.92394
chr7	67430724	67431723	1000	*	954	NA	441	441	3.92263
chr4	62475510	62476509	1000	*	4347	NA	442	442	3.92219
chr16	42919539	42920538	1000	*	1542	NA	443	443	3.92207
chr12	73594379	73595378	1000	*	2905	NA	444	444	3.92134
chr2	167377300	167378299	1000	*	1143	NA	445	445	3.92074
chr14	25521990	25522989	1000	*	4824	NA	446	446	3.917
chr1	138146573	138147572	1000	*	290	NA	447	447	3.91567
chr16	92798259	92799258	1000	*	247	NA	448	448	3.91151
chr4	134917992	134918991	1000	*	11111	NA	449	449	3.91151
chr5	124922290	124923289	1000	*	3112	NA	450	450	3.90924
chr5	38904998	38905997	1000	*	1576	NA	451	451	3.90708
chr6	103344473	103345472	1000	*	1970	NA	452	452	3.90642
chr17	28515585	28516584	1000	*	11070	NA	453	453	3.90249
chr4	32251945	32252944	1000	*	684	NA	454	454	3.9007
chr5	64496548	64497547	1000	*	904	NA	455	455	3.90053
chr6	41552164	41553163	1000	*	822	NA	456	456	3.89984
chr10	42838304	42839303	1000	*	10829	NA	457	457	3.89677
chr1	161670730	161671729	1000	*	7716	NA	458	458	3.89621
chr9	64814954	64815953	1000	*	11041	NA	459	459	3.89619
chr10	45019559	45020558	1000	*	29188	NA	460	460	3.89564
chr4	59262419	59263418	1000	*	1876	NA	461	461	3.89507
chr9	85118827	85119826	1000	*	960	NA	462	462	3.89451
chr2	22809662	22810661	1000	*	1115	NA	463	463	3.89433
chr17	73952621	73953620	1000	*	628	NA	464	464	3.89252
chr10	39518127	39519126	1000	*	603	NA	465	465	3.89251
chr17	35765155	35766154	1000	*	2419	NA	466	466	3.89063
chr7	49093804	49094803	1000	*	9858	NA	467	467	3.88585
chr3	19255310	19256309	1000	*	2664	NA	468	468	3.88417
chr14	66218941	66219940	1000	*	2639	NA	469	469	3.88402
chr2	11217814	11218813	1000	*	26768	NA	470	470	3.88353
chr11	11721755	11722754	1000	*	1039	NA	471	471	3.88168
chr11	117318017	117319016	1000	*	217	NA	472	472	3.88058
chr10	98785530	98786529	1000	*	8298	NA	473	473	3.88007
chr2	11194464	11195463	1000	*	167	NA	474	474	3.87937
chr2	22803668	22804667	1000	*	231	NA	475	475	3.87793
chr19	53442900	53443899	1000	*	570	NA	476	476	3.87749
chr6	129210059	129211058	1000	*	10472	NA	477	477	3.87666
chr9	32914405	32915404	1000	*	3684	NA	478	478	3.87619
chr10	96654188	96655187	1000	*	1636	NA	479	479	3.87559
chr9	85117457	85118456	1000	*	370	NA	480	480	3.87434
chr11	11717215	11718214	1000	*	221	NA	481	481	3.87415
chr9	124038605	124039604	1000	*	5213	NA	482	482	3.87343
chr9	32615747	32616746	1000	*	32037	NA	483	483	3.87286
chr4	11768867	11769866	1000	*	16631	NA	484	484	3.87104
chr13	101736345	101737344	1000	*	6728	NA	485	485	3.87061
chr12	79650366	79651365	1000	*	16414	NA	486	486	3.86863
chr9	45251107	45252106	1000	*	940	NA	487	487	3.86698
chr1	138145028	138146027	1000	*	2342	NA	488	488	3.86658
chr13	17626862	17627861	1000	*	12943	NA	489	489	3.86489
chr18	79063906	79064905	1000	*	8423	NA	490	490	3.86409
chr11	11703652	11704651	1000	*	1125	NA	491	491	3.86403
chr11	53841267	53842266	1000	*	5916	NA	492	492	3.86022
chr1	144329794	144330793	1000	*	3455	NA	493	493	3.8593
chr15	66755435	66756434	1000	*	226	NA	494	494	3.85907
chr11	22840199	22841198	1000	*	2344	NA	495	495	3.85783
chr9	63715754	63716753	1000	*	1269	NA	496	496	3.85526
chr2	155551986	155552985	1000	*	144	NA	497	497	3.8544
chr13	108303102	108304101	1000	*	14249	NA	498	498	3.85392
chr4	135018750	135019749	1000	*	3772	NA	499	499	3.85351
chr10	18964005	18965004	1000	*	8157	NA	500	500	3.85259
chr10	34170822	34171821	1000	*	17789	NA	501	501	3.85245
chr3	105763174	105764173	1000	*	1996	NA	502	502	3.85202
chr14	121906927	121907926	1000	*	806	NA	503	503	3.85151
chr6	99387586	99388585	1000	*	2287	NA	504	504	3.85149
chr18	21008023	21009022	1000	*	10875	NA	505	505	3.84909
chr5	140575159	140576158	1000	*	6613	NA	506	506	3.84855
chr2	22810755	22811754	1000	*	8069	NA	507	507	3.84777
chr11	74954669	74955668	1000	*	6074	NA	508	508	3.84745
chr10	96338036	96339035	1000	*	278	NA	509	509	3.84734
chr1	97580296	97581295	1000	*	12614	NA	510	510	3.84681
chr1	52577935	52578934	1000	*	13308	NA	511	511	3.84589
chr12	73595984	73596983	1000	*	6001	NA	512	512	3.84452
chr13	20815309	20816308	1000	*	199	NA	513	513	3.8408
chr9	32928289	32929288	1000	*	12633	NA	514	514	3.839
chr11	11521598	11522597	1000	*	2122	NA	515	515	3.8387
chr6	67436112	67437111	1000	*	1832	NA	516	516	3.83791
chr10	96338944	96339943	1000	*	964	NA	517	517	3.83783
chr7	135659162	135660161	1000	*	4687	NA	518	518	3.83691
chr6	120469262	120470261	1000	*	363	NA	519	519	3.8365
chr13	95710693	95711692	1000	*	1772	NA	520	520	3.83524
chr6	130288950	130289949	1000	*	1393	NA	521	521	3.83492
chr16	49769817	49770816	1000	*	3725	NA	522	522	3.8337
chr6	99257735	99258734	1000	*	6494	NA	523	523	3.83364
chr14	27383650	27384649	1000	*	2730	NA	524	524	3.83301
chr2	11203949	11204948	1000	*	13284	NA	525	525	3.83242
chr6	130195299	130196298	1000	*	487	NA	526	526	3.83207
chr16	43654781	43655780	1000	*	1604	NA	527	527	3.83087
chr7	90312101	90313100	1000	*	18786	NA	528	528	3.82911
chr7	142396346	142397345	1000	*	2553	NA	529	529	3.82803
chr12	69411784	69412783	1000	*	7789	NA	530	530	3.82798
chr7	66209655	66210654	1000	*	219	NA	531	531	3.8276
chr2	3763747	3764746	1000	*	2111	NA	532	532	3.82684
chr1	85732136	85733135	1000	*	120	NA	533	533	3.82488
chr7	128121431	128122430	1000	*	3841	NA	534	534	3.82472
chr6	98608794	98609793	1000	*	4530	NA	535	535	3.82467
chr16	44357344	44358343	1000	*	23454	NA	536	536	3.82466
chr1	138287352	138288351	1000	*	189	NA	537	537	3.82287
chr4	145229868	145230867	1000	*	8118	NA	538	538	3.82282
chr1	161764677	161765676	1000	*	6162	NA	539	539	3.82272
chr6	113672679	113673678	1000	*	149	NA	540	540	3.82222
chr17	35179079	35180078	1000	*	468	NA	541	541	3.82058
chr3	19256928	19257927	1000	*	1324	NA	542	542	3.81868
chr10	44819071	44820070	1000	*	406	NA	543	543	3.81819
chr10	96368882	96369881	1000	*	10452	NA	544	544	3.81545
chr5	62815299	62816298	1000	*	3618	NA	545	545	3.81297
chr11	21171941	21172940	1000	*	1373	NA	546	546	3.81296
chr9	13469379	13470378	1000	*	1343	NA	547	547	3.81267
chr1	170227359	170228358	1000	*	12002	NA	548	548	3.80991
chr14	54221152	54222151	1000	*	13	NA	549	549	3.80989
chr2	25146437	25147436	1000	*	1033	NA	550	550	3.80941
chr19	60947401	60948400	1000	*	58	NA	551	551	3.80801
chr2	22803965	22804964	1000	*	696	NA	552	552	3.80669
chr11	70917511	70918510	1000	*	9191	NA	553	553	3.80553
chr8	128643130	128644129	1000	*	131	NA	554	554	3.80496
chr11	115407996	115408995	1000	*	2682	NA	555	555	3.80488
chr6	130419000	130419999	1000	*	2563	NA	556	556	3.80453
chr6	130311987	130312986	1000	*	1197	NA	557	557	3.80363
chr1	164452282	164453281	1000	*	2848	NA	558	558	3.80267
chr10	39484122	39485121	1000	*	2299	NA	559	559	3.80164
chr11	64020508	64021507	1000	*	11472	NA	560	560	3.8013
chr17	28515996	28516995	1000	*	7040	NA	561	561	3.79908
chr1	86344005	86345004	1000	*	332	NA	562	562	3.79831
chr7	66188488	66189487	1000	*	831	NA	563	563	3.79829
chr9	72099797	72100796	1000	*	2649	NA	564	564	3.79768
chr10	118418737	118419736	1000	*	6787	NA	565	565	3.79711
chr15	60132397	60133396	1000	*	15161	NA	566	566	3.79702
chr1	53875551	53876550	1000	*	176	NA	567	567	3.79675
chr5	107611970	107612969	1000	*	2059	NA	568	568	3.79601
chr2	78960067	78961066	1000	*	735	NA	569	569	3.79573
chr10	39479157	39480156	1000	*	6794	NA	570	570	3.79523
chr5	64491655	64492654	1000	*	154	NA	571	571	3.79499
chr7	128136834	128137833	1000	*	698	NA	572	572	3.79478
chr10	53770992	53771991	1000	*	15033	NA	573	573	3.79456
chr1	88680486	88681485	1000	*	100	NA	574	574	3.79329
chr10	8055125	8056124	1000	*	9580	NA	575	575	3.79212
chr3	19450767	19451766	1000	*	90	NA	576	576	3.79123
chr11	86589738	86590737	1000	*	244	NA	577	577	3.79111
chr11	11705113	11706112	1000	*	1009	NA	578	578	3.79026
chr2	13412086	13413085	1000	*	116	NA	579	579	3.78945
chr1	86264657	86265656	1000	*	1803	NA	580	580	3.7887
chr4	7597606	7598605	1000	*	2410	NA	581	581	3.78774
chr9	61668401	61669400	1000	*	48	NA	582	582	3.78703
chr15	64205686	64206685	1000	*	2220	NA	583	583	3.78699
chr18	38380828	38381827	1000	*	1673	NA	584	584	3.78659
chr2	79126998	79127997	1000	*	2663	NA	585	585	3.78549
chr5	64484235	64485234	1000	*	14605	NA	586	586	3.78494
chr11	5432026	5433025	1000	*	22318	NA	587	587	3.78417
chr15	64077673	64078672	1000	*	101	NA	588	588	3.78343
chr9	116368692	116369691	1000	*	1126	NA	589	589	3.78275
chr13	52998317	52999316	1000	*	1095	NA	590	590	3.78268
chr5	20930333	20931332	1000	*	621	NA	591	591	3.78211
chr11	98465439	98466438	1000	*	720	NA	592	592	3.78173
chr8	124265396	124266395	1000	*	2181	NA	593	593	3.7814
chr6	117874463	117875462	1000	*	5614	NA	594	594	3.78061
chr8	128571768	128572767	1000	*	1689	NA	595	595	3.77946
chr17	52165638	52166637	1000	*	1289	NA	596	596	3.7786
chr15	66814964	66815963	1000	*	2104	NA	597	597	3.77759
chr2	11160353	11161352	1000	*	868	NA	598	598	3.77744
chr11	106544588	106545587	1000	*	1266	NA	599	599	3.77677
chr1	53889076	53890075	1000	*	141	NA	600	600	3.77549
chr9	124040611	124041610	1000	*	207	NA	601	601	3.77493
chr12	69412874	69413873	1000	*	1461	NA	602	602	3.7746
chr6	129224979	129225978	1000	*	229	NA	603	603	3.77345
chr1	161808811	161809810	1000	*	17894	NA	604	604	3.77314
chr12	25255929	25256928	1000	*	1975	NA	605	605	3.77286
chr14	64626618	64627617	1000	*	1129	NA	606	606	3.77277
chr11	11741791	11742790	1000	*	5672	NA	607	607	3.77212
chr9	64789017	64790016	1000	*	38444	NA	608	608	3.77205
chr9	33026744	33027743	1000	*	20351	NA	609	609	3.77167
chr12	114909618	114910617	1000	*	64	NA	610	610	3.76741
chr3	60536738	60537737	1000	*	6656	NA	611	611	3.76557
chr7	126469852	126470851	1000	*	2829	NA	612	612	3.76545
chr7	142394467	142395466	1000	*	1891	NA	613	613	3.76512
chr2	117442532	117443531	1000	*	1814	NA	614	614	3.76488
chr1	36261766	36262765	1000	*	5542	NA	615	615	3.76469
chr2	45185272	45186271	1000	*	142	NA	616	616	3.76438
chr11	67559258	67560257	1000	*	452	NA	617	617	3.76406
chr12	102308215	102309214	1000	*	774	NA	618	618	3.7638
chr10	44821377	44822376	1000	*	18813	NA	619	619	3.76326
chr7	16404130	16405129	1000	*	679	NA	620	620	3.76216
chr15	66804735	66805734	1000	*	3467	NA	621	621	3.76078
chr4	32139177	32140176	1000	*	5951	NA	622	622	3.76006
chr13	101658751	101659750	1000	*	6782	NA	623	623	3.75939
chr1	40473468	40474467	1000	*	21015	NA	624	624	3.75719
chr8	128642039	128643038	1000	*	3799	NA	625	625	3.7571
chr2	34976550	34977549	1000	*	2713	NA	626	626	3.75572
chr2	167648902	167649901	1000	*	10700	NA	627	627	3.75555
chr10	117919298	117920297	1000	*	710	NA	628	628	3.75276
chr2	48469170	48470169	1000	*	1413	NA	629	629	3.7526
chr6	129228733	129229732	1000	*	1339	NA	630	630	3.75052
chr12	98214950	98215949	1000	*	16189	NA	631	631	3.74972
chr15	78517774	78518773	1000	*	1379	NA	632	632	3.74876
chr10	7942658	7943657	1000	*	2056	NA	633	633	3.74874
chr1	54854110	54855109	1000	*	1995	NA	634	634	3.7484
chr10	19063326	19064325	1000	*	463	NA	635	635	3.74774
chr3	85162188	85163187	1000	*	10103	NA	636	636	3.74761
chr1	144307043	144308042	1000	*	5575	NA	637	637	3.74657
chr3	60438476	60439475	1000	*	4653	NA	638	638	3.74409
chr16	91446690	91447689	1000	*	503	NA	639	639	3.74199
chr10	118882839	118883838	1000	*	7416	NA	640	640	3.74157
chr11	46391822	46392821	1000	*	343	NA	641	641	3.73838
chr6	122258683	122259682	1000	*	8961	NA	642	642	3.73777
chr10	75300304	75301303	1000	*	21	NA	643	643	3.73692
chr9	65532737	65533736	1000	*	2467	NA	644	644	3.73606
chr10	130335373	130336372	1000	*	3039	NA	645	645	3.73574
chr12	92618933	92619932	1000	*	430	NA	646	646	3.73555
chr4	101175285	101176284	1000	*	14052	NA	647	647	3.73553
chr1	138587466	138588465	1000	*	1448	NA	648	648	3.73519
chr5	21418325	21419324	1000	*	365	NA	649	649	3.73507
chr19	40477465	40478464	1000	*	4440	NA	650	650	3.73504
chr9	13468462	13469461	1000	*	571	NA	651	651	3.73459
chr7	66183086	66184085	1000	*	435	NA	652	652	3.73304
chr1	88684701	88685700	1000	*	3305	NA	653	653	3.73287
chr6	136498914	136499913	1000	*	1353	NA	654	654	3.73263
chr8	54421755	54422754	1000	*	1233	NA	655	655	3.73245
chr11	87453385	87454384	1000	*	2261	NA	656	656	3.73157
chr4	59340368	59341367	1000	*	511	NA	657	657	3.73094
chr8	94412187	94413186	1000	*	179	NA	658	658	3.73077
chr1	170337350	170338349	1000	*	1554	NA	659	659	3.73072
chr6	130341138	130342137	1000	*	4737	NA	660	660	3.72956
chr12	92617744	92618743	1000	*	4783	NA	661	661	3.72907
chr6	65592320	65593319	1000	*	3359	NA	662	662	3.72898
chr19	53889276	53890275	1000	*	12196	NA	663	663	3.72705
chr2	29668603	29669602	1000	*	168	NA	664	664	3.72514
chr7	128055322	128056321	1000	*	3352	NA	665	665	3.72438
chr5	135709383	135710382	1000	*	670	NA	666	666	3.72363
chr2	18951900	18952899	1000	*	17123	NA	667	667	3.72297
chr19	53538608	53539607	1000	*	1499	NA	668	668	3.72291
chr2	78997156	78998155	1000	*	1648	NA	669	669	3.72187
chr16	58542973	58543972	1000	*	5193	NA	670	670	3.72174
chr11	98509096	98510095	1000	*	4155	NA	671	671	3.72147
chr11	75935527	75936526	1000	*	103	NA	672	672	3.7214
chr1	53845912	53846911	1000	*	165	NA	673	673	3.72137
chr7	73596636	73597635	1000	*	8794	NA	674	674	3.7201
chr1	54912198	54913197	1000	*	15591	NA	675	675	3.72006
chr7	126774177	126775176	1000	*	99	NA	676	676	3.72
chr6	136549356	136550355	1000	*	1528	NA	677	677	3.71937
chr14	54146158	54147157	1000	*	10382	NA	678	678	3.71869
chr6	129544839	129545838	1000	*	1202	NA	679	679	3.71861
chr15	100418150	100419149	1000	*	4650	NA	680	680	3.71798
chr13	33000942	33001941	1000	*	869	NA	681	681	3.7158
chr16	92786800	92787799	1000	*	4387	NA	682	682	3.71562
chr10	19505842	19506841	1000	*	28649	NA	683	683	3.7145
chr18	70533666	70534665	1000	*	6650	NA	684	684	3.71313
chr11	46392110	46393109	1000	*	650	NA	685	685	3.71216
chr10	53770076	53771075	1000	*	51	NA	686	686	3.71181
chr10	39489759	39490758	1000	*	727	NA	687	687	3.71109
chr2	11193788	11194787	1000	*	156	NA	688	688	3.71083
chr5	112242982	112243981	1000	*	102	NA	689	689	3.70801
chr18	21008423	21009422	1000	*	9567	NA	690	690	3.70756
chr11	49996929	49997928	1000	*	2784	NA	691	691	3.70741
chr14	64884452	64885451	1000	*	6757	NA	692	692	3.70694
chr3	52880730	52881729	1000	*	1158	NA	693	693	3.70656
chr7	66150794	66151793	1000	*	404	NA	694	694	3.70528
chr9	90244479	90245478	1000	*	4025	NA	695	695	3.70478
chr1	52652251	52653250	1000	*	342	NA	696	696	3.70381
chr12	73597956	73598955	1000	*	6312	NA	697	697	3.70337
chr6	108503748	108504747	1000	*	3847	NA	698	698	3.70128
chr4	145277718	145278717	1000	*	649	NA	699	699	3.7006
chr6	8649945	8650944	1000	*	414	NA	700	700	3.70001
chr10	88425964	88426963	1000	*	543	NA	701	701	3.69884
chr9	32659950	32660949	1000	*	4146	NA	702	702	3.69869
chr4	135078569	135079568	1000	*	30	NA	703	703	3.69767
chr9	99130808	99131807	1000	*	1276	NA	704	704	3.6964
chr4	101200591	101201590	1000	*	894	NA	705	705	3.69622
chr14	54040292	54041291	1000	*	3366	NA	706	706	3.69518
chr12	117820479	117821478	1000	*	1241	NA	707	707	3.69453
chr13	32903054	32904053	1000	*	479	NA	708	708	3.69334
chr7	66199096	66200095	1000	*	15767	NA	709	709	3.69264
chr4	59337402	59338401	1000	*	143	NA	710	710	3.69164
chr1	143916766	143917765	1000	*	57	NA	711	711	3.69122
chr1	161792892	161793891	1000	*	185	NA	712	712	3.68973
chr12	104054982	104055981	1000	*	2145	NA	713	713	3.68903
chr6	129599442	129600441	1000	*	7255	NA	714	714	3.68894
chr2	6708839	6709838	1000	*	1962	NA	715	715	3.68845
chr10	93170984	93171983	1000	*	31314	NA	716	716	3.6878
chr10	96180778	96181777	1000	*	27538	NA	717	717	3.68778
chr4	152188392	152189391	1000	*	3188	NA	718	718	3.6877
chr8	84063671	84064670	1000	*	35279	NA	719	719	3.68737
chr16	10771667	10772666	1000	*	12096	NA	720	720	3.6871
chr1	60530289	60531288	1000	*	851	NA	721	721	3.68708
chr19	60184107	60185106	1000	*	546	NA	722	722	3.68694
chr15	52749711	52750710	1000	*	1025	NA	723	723	3.68481
chr1	138152654	138153653	1000	*	6065	NA	724	724	3.68449
chr5	64477460	64478459	1000	*	1360	NA	725	725	3.68301
chr13	37621595	37622594	1000	*	3209	NA	726	726	3.68183
chr9	108146152	108147151	1000	*	109	NA	727	727	3.68162
chr13	33072620	33073619	1000	*	96	NA	728	728	3.68136
chr15	60096888	60097887	1000	*	228	NA	729	729	3.68016
chr13	32981991	32982990	1000	*	49	NA	730	730	3.67992
chr8	128594846	128595845	1000	*	16159	NA	731	731	3.67801
chr10	108139239	108140238	1000	*	19060	NA	732	732	3.6772
chr6	54950680	54951679	1000	*	488	NA	733	733	3.67638
chr2	18178421	18179420	1000	*	2171	NA	734	734	3.67631
chr10	44818193	44819192	1000	*	3353	NA	735	735	3.6751
chr13	85283634	85284633	1000	*	2339	NA	736	736	3.67474
chr15	63967424	63968423	1000	*	3612	NA	737	737	3.67413
chr2	78979643	78980642	1000	*	1957	NA	738	738	3.6723
chr1	171677315	171678314	1000	*	3300	NA	739	739	3.67138
chr16	52092505	52093504	1000	*	296	NA	740	740	3.67079
chr10	130334862	130335861	1000	*	14696	NA	741	741	3.67054
chr10	8131972	8132971	1000	*	182	NA	742	742	3.66911
chrX	167038354	167039353	1000	*	1438	NA	743	743	3.66909
chr2	166650148	166651147	1000	*	16797	NA	744	744	3.6674
chr7	114171289	114172288	1000	*	4003	NA	745	745	3.66663
chr10	85353726	85354725	1000	*	545	NA	746	746	3.66643
chr3	59259691	59260690	1000	*	482	NA	747	747	3.66567
chr19	41338946	41339945	1000	*	5735	NA	748	748	3.66543
chr12	115256508	115257507	1000	*	464	NA	749	749	3.66469
chr3	69201985	69202984	1000	*	4142	NA	750	750	3.66447
chr10	18946522	18947521	1000	*	1447	NA	751	751	3.66266
chr15	100708042	100709041	1000	*	50	NA	752	752	3.66189
chr3	60534924	60535923	1000	*	4905	NA	753	753	3.66141
chr11	11713371	11714370	1000	*	2071	NA	754	754	3.66134
chr8	72355380	72356379	1000	*	1079	NA	755	755	3.66021
chr5	105643019	105644018	1000	*	115	NA	756	756	3.65979
chr7	72269804	72270803	1000	*	22495	NA	757	757	3.65906
chr9	32987613	32988612	1000	*	610	NA	758	758	3.65856
chr10	61276503	61277502	1000	*	458	NA	759	759	3.65849
chr12	25227370	25228369	1000	*	397	NA	760	760	3.65722
chr6	90745639	90746638	1000	*	1391	NA	761	761	3.65647
chr11	77371879	77372878	1000	*	22576	NA	762	762	3.65516
chr1	127318132	127319131	1000	*	1597	NA	763	763	3.65512
chr4	108454396	108455395	1000	*	28965	NA	764	764	3.65391
chr11	11761985	11762984	1000	*	3807	NA	765	765	3.65296
chr5	21262929	21263928	1000	*	6075	NA	766	766	3.65229
chr13	30912993	30913992	1000	*	901	NA	767	767	3.65201
chr11	106415929	106416928	1000	*	401	NA	768	768	3.6515
chr1	106602302	106603301	1000	*	3355	NA	769	769	3.64939
chr1	51577612	51578611	1000	*	33	NA	770	770	3.64894
chr2	166630935	166631934	1000	*	2141	NA	771	771	3.64894
chr11	118136030	118137029	1000	*	627	NA	772	772	3.64874
chr10	18922998	18923997	1000	*	605	NA	773	773	3.64873
chr1	106600454	106601453	1000	*	20973	NA	774	774	3.64736
chr1	161780666	161781665	1000	*	6536	NA	775	775	3.64734
chr14	106023843	106024842	1000	*	1567	NA	776	776	3.64665
chr8	120783621	120784620	1000	*	3427	NA	777	777	3.64354
chr11	68443459	68444458	1000	*	205	NA	778	778	3.64122
chr1	185104989	185105988	1000	*	9760	NA	779	779	3.63976
chr1	40475494	40476493	1000	*	22304	NA	780	780	3.6393
chr6	130430249	130431248	1000	*	8011	NA	781	781	3.63859
chr9	21132124	21133123	1000	*	339	NA	782	782	3.6381
chr18	80546236	80547235	1000	*	281	NA	783	783	3.63773
chr10	96203768	96204767	1000	*	5569	NA	784	784	3.63751
chr3	90589120	90590119	1000	*	467	NA	785	785	3.637
chr1	165010889	165011888	1000	*	5045	NA	786	786	3.63659
chr6	143867801	143868800	1000	*	1649	NA	787	787	3.63426
chr14	54059620	54060619	1000	*	106	NA	788	788	3.63331
chr15	78500640	78501639	1000	*	267	NA	789	789	3.63321
chr9	64815330	64816329	1000	*	7266	NA	790	790	3.63306
chr12	100500866	100501865	1000	*	10193	NA	791	791	3.6329
chr6	66412621	66413620	1000	*	4718	NA	792	792	3.63219
chr13	20092974	20093973	1000	*	8568	NA	793	793	3.63219
chr14	60130098	60131097	1000	*	2795	NA	794	794	3.63208
chr7	142398908	142399907	1000	*	3068	NA	795	795	3.62911
chr10	96407581	96408580	1000	*	14687	NA	796	796	3.62702
chr18	32161006	32162005	1000	*	184	NA	797	797	3.62647
chr10	78303443	78304442	1000	*	497	NA	798	798	3.62526
chr18	75445834	75446833	1000	*	1006	NA	799	799	3.62406
chr16	78198103	78199102	1000	*	1521	NA	800	800	3.62266
chr8	94414373	94415372	1000	*	6195	NA	801	801	3.62254
chr8	94414862	94415861	1000	*	1010	NA	802	802	3.62055
chr14	77870943	77871942	1000	*	8575	NA	803	803	3.6203
chr10	122727358	122728357	1000	*	2395	NA	804	804	3.61889
chr13	92241597	92242596	1000	*	6213	NA	805	805	3.61696
chr9	124051395	124052394	1000	*	52	NA	806	806	3.61679
chr11	16982529	16983528	1000	*	242	NA	807	807	3.61672
chr17	35766096	35767095	1000	*	2069	NA	808	808	3.61644
chr4	59221325	59222324	1000	*	3201	NA	809	809	3.61533
chr6	103337778	103338777	1000	*	579	NA	810	810	3.61319
chr10	19529731	19530730	1000	*	1500	NA	811	811	3.60947
chr3	103781745	103782744	1000	*	7982	NA	812	812	3.60869
chr9	33060341	33061340	1000	*	8288	NA	813	813	3.6085
chr7	4328441	4329440	1000	*	63	NA	814	814	3.60699
chr10	34197320	34198319	1000	*	9154	NA	815	815	3.60663
chr10	41525005	41526004	1000	*	2359	NA	816	816	3.60647
chr7	3444260	3445259	1000	*	5618	NA	817	817	3.60646
chr11	117318607	117319606	1000	*	508	NA	818	818	3.60564
chr12	102289948	102290947	1000	*	756	NA	819	819	3.60501
chr13	5849845	5850844	1000	*	9897	NA	820	820	3.60488
chr4	59257644	59258643	1000	*	768	NA	821	821	3.60452
chr19	60950030	60951029	1000	*	1527	NA	822	822	3.60396
chr7	123217839	123218838	1000	*	1526	NA	823	823	3.60385
chr7	58473573	58474572	1000	*	1075	NA	824	824	3.60374
chr3	60470401	60471400	1000	*	2831	NA	825	825	3.60309
chr6	59415944	59416943	1000	*	759	NA	826	826	3.60248
chr8	128642683	128643682	1000	*	449	NA	827	827	3.60201
chr6	117914093	117915092	1000	*	6142	NA	828	828	3.60128
chr10	6986986	6987985	1000	*	923	NA	829	829	3.60072
chr17	24563234	24564233	1000	*	374	NA	830	830	3.60023
chr7	67429751	67430750	1000	*	5463	NA	831	831	3.59972
chr1	43464586	43465585	1000	*	348	NA	832	832	3.59955
chr2	129243625	129244624	1000	*	18385	NA	833	833	3.59953
chr2	45186538	45187537	1000	*	1385	NA	834	834	3.59936
chr11	83631750	83632749	1000	*	492	NA	835	835	3.59908
chr9	45274325	45275324	1000	*	233	NA	836	836	3.59889
chr16	78606410	78607409	1000	*	25569	NA	837	837	3.59719
chr12	25365769	25366768	1000	*	1662	NA	838	838	3.59445
chr11	70806424	70807423	1000	*	799	NA	839	839	3.59396
chr1	120054031	120055030	1000	*	132	NA	840	840	3.5933
chr15	102090989	102091988	1000	*	2896	NA	841	841	3.59291
chr9	13446363	13447362	1000	*	2309	NA	842	842	3.59195
chr1	51576767	51577766	1000	*	315	NA	843	843	3.59194
chr12	69257632	69258631	1000	*	22732	NA	844	844	3.59084
chr13	97385317	97386316	1000	*	323	NA	845	845	3.58994
chr3	21985979	21986978	1000	*	194	NA	846	846	3.58984
chr2	3737343	3738342	1000	*	1092	NA	847	847	3.58959
chr6	130310909	130311908	1000	*	1830	NA	848	848	3.58902
chr1	165711631	165712630	1000	*	4882	NA	849	849	3.58757
chr9	123930477	123931476	1000	*	1960	NA	850	850	3.58737
chr10	117112245	117113244	1000	*	5826	NA	851	851	3.58584
chr17	7876462	7877461	1000	*	2000	NA	852	852	3.585
chr5	21256203	21257202	1000	*	311	NA	853	853	3.58496
chr9	21132844	21133843	1000	*	2536	NA	854	854	3.58476
chr4	95166243	95167242	1000	*	413	NA	855	855	3.58413
chr9	65549349	65550348	1000	*	345	NA	856	856	3.58373
chr6	119377490	119378489	1000	*	1708	NA	857	857	3.58339
chr6	128770193	128771192	1000	*	4288	NA	858	858	3.58216
chr3	60412538	60413537	1000	*	416	NA	859	859	3.58191
chr15	62808969	62809968	1000	*	633	NA	860	860	3.58173
chr9	124050745	124051744	1000	*	2973	NA	861	861	3.58143
chr7	90003774	90004773	1000	*	3576	NA	862	862	3.58134
chr9	124108127	124109126	1000	*	18979	NA	863	863	3.58105
chr2	11216338	11217337	1000	*	4549	NA	864	864	3.58015
chr10	34198279	34199278	1000	*	882	NA	865	865	3.5796
chr10	39488201	39489200	1000	*	10920	NA	866	866	3.57923
chr10	21907396	21908395	1000	*	4764	NA	867	867	3.57918
chr8	57408206	57409205	1000	*	3400	NA	868	868	3.5782
chr12	115790172	115791171	1000	*	2194	NA	869	869	3.57744
chr5	37044990	37045989	1000	*	104	NA	870	870	3.57733
chr6	31079291	31080290	1000	*	1585	NA	871	871	3.57704
chr11	83630270	83631269	1000	*	1572	NA	872	872	3.57648
chr4	135076617	135077616	1000	*	11783	NA	873	873	3.57552
chr17	17620707	17621706	1000	*	1200	NA	874	874	3.57507
chr9	65551838	65552837	1000	*	734	NA	875	875	3.57486
chr12	110759173	110760172	1000	*	6694	NA	876	876	3.57382
chr10	45020991	45021990	1000	*	39	NA	877	877	3.57298
chr11	83605202	83606201	1000	*	790	NA	878	878	3.57297
chr1	161799376	161800375	1000	*	2321	NA	879	879	3.57236
chr16	92863985	92864984	1000	*	111	NA	880	880	3.57183
chr1	80361445	80362444	1000	*	881	NA	881	881	3.57066
chr2	166234240	166235239	1000	*	369	NA	882	882	3.56965
chr14	27401889	27402888	1000	*	1802	NA	883	883	3.56924
chr1	138323351	138324350	1000	*	705	NA	884	884	3.56862
chr8	116552203	116553202	1000	*	5100	NA	885	885	3.56813
chr11	86623947	86624946	1000	*	11179	NA	886	886	3.56797
chr6	128628969	128629968	1000	*	1068	NA	887	887	3.56628
chr4	19928689	19929688	1000	*	1867	NA	888	888	3.56601
chr16	92814238	92815237	1000	*	1676	NA	889	889	3.565
chr2	60810255	60811254	1000	*	2939	NA	890	890	3.56462
chr1	40497273	40498272	1000	*	584	NA	891	891	3.56433
chr6	108630574	108631573	1000	*	4363	NA	892	892	3.56432
chr7	75600282	75601281	1000	*	8213	NA	893	893	3.5641
chr14	77869248	77870247	1000	*	1550	NA	894	894	3.56375
chr2	30623690	30624689	1000	*	24792	NA	895	895	3.56335
chr10	81510118	81511117	1000	*	7768	NA	896	896	3.56298
chr12	3441029	3442028	1000	*	12827	NA	897	897	3.5629
chr2	78961327	78962326	1000	*	18358	NA	898	898	3.5623
chr10	21203503	21204502	1000	*	411	NA	899	899	3.56223
chr10	44820092	44821091	1000	*	8349	NA	900	900	3.56166
chr1	92102772	92103771	1000	*	999	NA	901	901	3.56147
chr1	52649654	52650653	1000	*	4809	NA	902	902	3.56129
chr13	95715071	95716070	1000	*	591	NA	903	903	3.56101
chr4	19927917	19928916	1000	*	180	NA	904	904	3.56091
chr12	110501975	110502974	1000	*	1119	NA	905	905	3.56084
chr11	22840942	22841941	1000	*	11068	NA	906	906	3.56042
chr12	102330403	102331402	1000	*	152	NA	907	907	3.5601
chr5	64490202	64491201	1000	*	1367	NA	908	908	3.55902
chr6	54936605	54937604	1000	*	9524	NA	909	909	3.55891
chr7	73596955	73597954	1000	*	4979	NA	910	910	3.55843
chr4	48074720	48075719	1000	*	6645	NA	911	911	3.55838
chr19	37563479	37564478	1000	*	2388	NA	912	912	3.55835
chr19	11064956	11065955	1000	*	341	NA	913	913	3.5583
chr10	45026572	45027571	1000	*	4555	NA	914	914	3.55715
chr12	25298503	25299502	1000	*	2313	NA	915	915	3.55666
chr2	127320841	127321840	1000	*	461	NA	916	916	3.55624
chr2	101816555	101817554	1000	*	1254	NA	917	917	3.55598
chr4	59530823	59531822	1000	*	134	NA	918	918	3.5544
chr13	85503608	85504607	1000	*	512	NA	919	919	3.55383
chr6	130429171	130430170	1000	*	581	NA	920	920	3.55349
chr5	37044420	37045419	1000	*	403	NA	921	921	3.55344
chr10	44449524	44450523	1000	*	6233	NA	922	922	3.55303
chr10	127107282	127108281	1000	*	17229	NA	923	923	3.55291
chr12	25862207	25863206	1000	*	1578	NA	924	924	3.55264
chr13	45453768	45454767	1000	*	16379	NA	925	925	3.55236
chr6	99784856	99785855	1000	*	2335	NA	926	926	3.55215
chr1	143918878	143919877	1000	*	17376	NA	927	927	3.55152
chr7	78722550	78723549	1000	*	3185	NA	928	928	3.55049
chr2	13414818	13415817	1000	*	890	NA	929	929	3.54942
chr10	112000006	112001005	1000	*	9582	NA	930	930	3.54858
chr6	129227499	129228498	1000	*	215	NA	931	931	3.5476
chr7	90310880	90311879	1000	*	817	NA	932	932	3.54719
chr11	98509805	98510804	1000	*	4061	NA	933	933	3.54716
chr2	103661834	103662833	1000	*	1589	NA	934	934	3.54678
chr16	64801392	64802391	1000	*	978	NA	935	935	3.54581
chr1	166015421	166016420	1000	*	1620	NA	936	936	3.54482
chr1	138588140	138589139	1000	*	1066	NA	937	937	3.5447
chr11	98478684	98479683	1000	*	4777	NA	938	938	3.5446
chr15	5512213	5513212	1000	*	470	NA	939	939	3.54447
chr6	129229915	129230914	1000	*	2352	NA	940	940	3.54333
chr10	96324971	96325970	1000	*	31	NA	941	941	3.54223
chr6	113654591	113655590	1000	*	26996	NA	942	942	3.54173
chr6	8645945	8646944	1000	*	2063	NA	943	943	3.54157
chr10	118095835	118096834	1000	*	1012	NA	944	944	3.54151
chr14	120520548	120521547	1000	*	1767	NA	945	945	3.5414
chr10	93167782	93168781	1000	*	11498	NA	946	946	3.54109
chr8	36178223	36179222	1000	*	1916	NA	947	947	3.54098
chr1	54921949	54922948	1000	*	1651	NA	948	948	3.54029
chr16	57468713	57469712	1000	*	766	NA	949	949	3.53924
chr4	59236069	59237068	1000	*	17077	NA	950	950	3.53904
chr1	52801275	52802274	1000	*	3715	NA	951	951	3.53852
chr15	63968852	63969851	1000	*	8241	NA	952	952	3.53679
chr16	92784562	92785561	1000	*	682	NA	953	953	3.53674
chr14	73127417	73128416	1000	*	357	NA	954	954	3.53505
chr2	164849604	164850603	1000	*	436	NA	955	955	3.535
chr12	110758619	110759618	1000	*	12421	NA	956	956	3.53479
chr19	11395211	11396210	1000	*	6663	NA	957	957	3.53458
chr11	83538495	83539494	1000	*	3037	NA	958	958	3.53382
chr14	106210892	106211891	1000	*	8555	NA	959	959	3.53379
chr8	123037205	123038204	1000	*	14663	NA	960	960	3.53238
chr8	81497188	81498187	1000	*	10145	NA	961	961	3.53202
chr16	92796277	92797276	1000	*	599	NA	962	962	3.53161
chr11	107410466	107411465	1000	*	12976	NA	963	963	3.53156
chr4	101216631	101217630	1000	*	1086	NA	964	964	3.53097
chr11	11766019	11767018	1000	*	957	NA	965	965	3.53051
chr13	96523847	96524846	1000	*	7077	NA	966	966	3.52961
chr2	37565242	37566241	1000	*	12089	NA	967	967	3.52894
chr13	113070760	113071759	1000	*	3636	NA	968	968	3.52858
chr9	64792560	64793559	1000	*	36016	NA	969	969	3.52829
chr15	99335609	99336608	1000	*	4218	NA	970	970	3.52827
chr2	166672742	166673741	1000	*	59	NA	971	971	3.52819
chr16	24153647	24154646	1000	*	490	NA	972	972	3.52726
chr19	53405455	53406454	1000	*	1133	NA	973	973	3.52647
chr16	96907404	96908403	1000	*	11025	NA	974	974	3.52577
chr9	124037337	124038336	1000	*	728	NA	975	975	3.52294
chr12	117819885	117820884	1000	*	1653	NA	976	976	3.5226
chr11	54775577	54776576	1000	*	16548	NA	977	977	3.52239
chr4	59278006	59279005	1000	*	31870	NA	978	978	3.52206
chr1	128605861	128606860	1000	*	1054	NA	979	979	3.52155
chr11	32563287	32564286	1000	*	595	NA	980	980	3.52119
chr7	101316493	101317492	1000	*	8634	NA	981	981	3.51973
chr9	32906057	32907056	1000	*	29748	NA	982	982	3.51973
chr7	66252118	66253117	1000	*	2743	NA	983	983	3.5193
chr11	67580237	67581236	1000	*	826	NA	984	984	3.51923
chr18	89246443	89247442	1000	*	4472	NA	985	985	3.51763
chr1	170351209	170352208	1000	*	1018	NA	986	986	3.51712
chr8	126848286	126849285	1000	*	850	NA	987	987	3.51634
chr8	70695047	70696046	1000	*	12480	NA	988	988	3.5159
chr3	52893216	52894215	1000	*	852	NA	989	989	3.51563
chr8	35992583	35993582	1000	*	2860	NA	990	990	3.51555
chr13	102121967	102122966	1000	*	7291	NA	991	991	3.51518
chr10	96400191	96401190	1000	*	2334	NA	992	992	3.51321
chr6	67338599	67339598	1000	*	834	NA	993	993	3.51251
chr6	48801779	48802778	1000	*	4500	NA	994	994	3.51159
chr1	166014218	166015217	1000	*	5387	NA	995	995	3.51146
chr1	86229182	86230181	1000	*	114	NA	996	996	3.51072
chr19	53186594	53187593	1000	*	10165	NA	997	997	3.51028
chr11	75976415	75977414	1000	*	12690	NA	998	998	3.51005
chr15	86180049	86181048	1000	*	1145	NA	999	999	3.50976
chr10	96655916	96656915	1000	*	949	NA	1000	1000	3.50886
chr10	19497897	19498896	1000	*	26742	NA	1001	1001	3.50845
chr2	152790609	152791608	1000	*	1212	NA	1002	1002	3.50807
chr7	30402076	30403075	1000	*	8804	NA	1003	1003	3.50752
chr11	21173020	21174019	1000	*	150	NA	1004	1004	3.5073
chr19	41333956	41334955	1000	*	2836	NA	1005	1005	3.50649
chr17	88700673	88701672	1000	*	331	NA	1006	1006	3.50647
chr14	70792211	70793210	1000	*	20570	NA	1007	1007	3.50604
chr9	123941041	123942040	1000	*	1321	NA	1008	1008	3.50561
chr8	122918389	122919388	1000	*	1002	NA	1009	1009	3.50553
chr5	20932261	20933260	1000	*	984	NA	1010	1010	3.5054
chr5	31602199	31603198	1000	*	7298	NA	1011	1011	3.50533
chr1	138129858	138130857	1000	*	8132	NA	1012	1012	3.50466
chr7	49091991	49092990	1000	*	7032	NA	1013	1013	3.50326
chr11	11720952	11721951	1000	*	1805	NA	1014	1014	3.50316
chr11	86591081	86592080	1000	*	9819	NA	1015	1015	3.50259
chr2	78986126	78987125	1000	*	844	NA	1016	1016	3.501
chr9	61705431	61706430	1000	*	253	NA	1017	1017	3.50092
chr5	107650446	107651445	1000	*	3034	NA	1018	1018	3.5009
chr15	42658740	42659739	1000	*	1992	NA	1019	1019	3.50079
chr15	78502029	78503028	1000	*	3002	NA	1020	1020	3.5005
chr11	118143346	118144345	1000	*	1314	NA	1021	1021	3.50044
chr4	7595099	7596098	1000	*	1657	NA	1022	1022	3.49966
chr12	65065282	65066281	1000	*	3908	NA	1023	1023	3.49865
chr1	86228408	86229407	1000	*	4822	NA	1024	1024	3.49853
chr13	114894398	114895397	1000	*	1841	NA	1025	1025	3.49823
chr19	9107047	9108046	1000	*	721	NA	1026	1026	3.49818
chr12	100988110	100989109	1000	*	640	NA	1027	1027	3.49771
chr16	91825605	91826604	1000	*	854	NA	1028	1028	3.49763
chr6	122758435	122759434	1000	*	81	NA	1029	1029	3.49631
chr15	36781664	36782663	1000	*	19028	NA	1030	1030	3.49551
chr2	127309770	127310769	1000	*	475	NA	1031	1031	3.49549
chr11	121026961	121027960	1000	*	13352	NA	1032	1032	3.49537
chr2	25128931	25129930	1000	*	1635	NA	1033	1033	3.49482
chr1	85739531	85740530	1000	*	2233	NA	1034	1034	3.49481
chr12	69413613	69414612	1000	*	1067	NA	1035	1035	3.49428
chr12	102320959	102321958	1000	*	2758	NA	1036	1036	3.49423
chr15	5510888	5511887	1000	*	16529	NA	1037	1037	3.4941
chr1	185120533	185121532	1000	*	7145	NA	1038	1038	3.49372
chr14	70796512	70797511	1000	*	2036	NA	1039	1039	3.49262
chr12	100895067	100896066	1000	*	11353	NA	1040	1040	3.49253
chr7	66146881	66147880	1000	*	350	NA	1041	1041	3.4925
chr3	60519037	60520036	1000	*	3363	NA	1042	1042	3.4913
chr12	92678759	92679758	1000	*	450	NA	1043	1043	3.49106
chr9	66277739	66278738	1000	*	241	NA	1044	1044	3.49024
chr1	151689080	151690079	1000	*	645	NA	1045	1045	3.48976
chr9	92289923	92290922	1000	*	314	NA	1046	1046	3.4894
chr8	82495032	82496031	1000	*	5212	NA	1047	1047	3.48832
chr1	127308615	127309614	1000	*	21248	NA	1048	1048	3.48832
chr1	138972871	138973870	1000	*	1326	NA	1049	1049	3.4882
chr4	145249613	145250612	1000	*	360	NA	1050	1050	3.4881
chr8	46852229	46853228	1000	*	12103	NA	1051	1051	3.48771
chr9	32489164	32490163	1000	*	1118	NA	1052	1052	3.48767
chr13	20095020	20096019	1000	*	1723	NA	1053	1053	3.48662
chr2	126473873	126474872	1000	*	13397	NA	1054	1054	3.4865
chr7	66247112	66248111	1000	*	7286	NA	1055	1055	3.48596
chr10	39192484	39193483	1000	*	1913	NA	1056	1056	3.48481
chr2	78990992	78991991	1000	*	98	NA	1057	1057	3.48442
chr4	32363359	32364358	1000	*	17875	NA	1058	1058	3.48343
chr5	62574877	62575876	1000	*	381	NA	1059	1059	3.48342
chr3	27329834	27330833	1000	*	295	NA	1060	1060	3.48268
chr2	22803276	22804275	1000	*	637	NA	1061	1061	3.48214
chr15	76273850	76274849	1000	*	7207	NA	1062	1062	3.4821
chr13	24511307	24512306	1000	*	7239	NA	1063	1063	3.48161
chr16	49887121	49888120	1000	*	1049	NA	1064	1064	3.48135
chr1	120056950	120057949	1000	*	136	NA	1065	1065	3.48126
chr4	101216233	101217232	1000	*	693	NA	1066	1066	3.48119
chr5	140569934	140570933	1000	*	2493	NA	1067	1067	3.48102
chr1	120053658	120054657	1000	*	396	NA	1068	1068	3.48069
chr12	99942199	99943198	1000	*	10279	NA	1069	1069	3.4796
chr1	88654672	88655671	1000	*	7600	NA	1070	1070	3.47899
chr17	17604172	17605171	1000	*	431	NA	1071	1071	3.47836
chr10	117898337	117899336	1000	*	2230	NA	1072	1072	3.47834
chr6	130139796	130140795	1000	*	14541	NA	1073	1073	3.47811
chr5	21042743	21043742	1000	*	6755	NA	1074	1074	3.47754
chr10	98781573	98782572	1000	*	1251	NA	1075	1075	3.4774
chr2	45184912	45185911	1000	*	918	NA	1076	1076	3.4773
chr11	106563830	106564829	1000	*	8114	NA	1077	1077	3.47625
chr11	87452814	87453813	1000	*	1275	NA	1078	1078	3.47606
chr15	66826865	66827864	1000	*	1618	NA	1079	1079	3.4758
chr1	164449454	164450453	1000	*	17532	NA	1080	1080	3.47569
chr19	41338091	41339090	1000	*	3813	NA	1081	1081	3.47452
chr4	7750947	7751946	1000	*	30624	NA	1082	1082	3.47245
chr13	85499956	85500955	1000	*	5263	NA	1083	1083	3.47218
chr16	96906184	96907183	1000	*	740	NA	1084	1084	3.47215
chr17	83987570	83988569	1000	*	6461	NA	1085	1085	3.47215
chr19	53412333	53413332	1000	*	902	NA	1086	1086	3.47165
chr6	54807154	54808153	1000	*	2650	NA	1087	1087	3.4715
chr8	120680878	120681877	1000	*	3134	NA	1088	1088	3.4708
chr14	56275678	56276677	1000	*	7442	NA	1089	1089	3.47078
chr16	52094260	52095259	1000	*	9663	NA	1090	1090	3.47068
chr14	54152538	54153537	1000	*	26	NA	1091	1091	3.47053
chr7	142393952	142394951	1000	*	741	NA	1092	1092	3.47027
chr17	51815788	51816787	1000	*	1828	NA	1093	1093	3.46944
chr8	54441973	54442972	1000	*	1214	NA	1094	1094	3.46926
chr1	127295260	127296259	1000	*	2603	NA	1095	1095	3.46903
chr4	139204631	139205630	1000	*	6223	NA	1096	1096	3.46855
chr3	115691925	115692924	1000	*	1258	NA	1097	1097	3.4684
chr19	60934563	60935562	1000	*	7619	NA	1098	1098	3.46784
chr19	9106417	9107416	1000	*	327	NA	1099	1099	3.46759
chr1	144328941	144329940	1000	*	324	NA	1100	1100	3.46734
chr16	55636559	55637558	1000	*	28179	NA	1101	1101	3.46726
chr13	85516527	85517526	1000	*	4698	NA	1102	1102	3.46704
chr13	19195134	19196133	1000	*	3990	NA	1103	1103	3.46688
chr10	118602718	118603717	1000	*	1284	NA	1104	1104	3.46675
chr1	125441163	125442162	1000	*	32117	NA	1105	1105	3.46637
chr1	106606623	106607622	1000	*	2728	NA	1106	1106	3.46615
chr9	45277850	45278849	1000	*	2789	NA	1107	1107	3.465
chr6	86660281	86661280	1000	*	1056	NA	1108	1108	3.46439
chr1	52039406	52040405	1000	*	255	NA	1109	1109	3.46373
chr13	91377204	91378203	1000	*	2436	NA	1110	1110	3.46305
chr7	66302021	66303020	1000	*	842	NA	1111	1111	3.463
chr10	118081184	118082183	1000	*	496	NA	1112	1112	3.46292
chr5	73284473	73285472	1000	*	936	NA	1113	1113	3.46273
chr2	11359799	11360798	1000	*	359	NA	1114	1114	3.46252
chr3	14894267	14895266	1000	*	272	NA	1115	1115	3.46212
chr10	108120422	108121421	1000	*	232	NA	1116	1116	3.46105
chr2	146423163	146424162	1000	*	1468	NA	1117	1117	3.46105
chr14	54033970	54034969	1000	*	1634	NA	1118	1118	3.46075
chr10	96238137	96239136	1000	*	371	NA	1119	1119	3.46022
chr11	34769081	34770080	1000	*	1979	NA	1120	1120	3.45984
chr4	145018752	145019751	1000	*	85	NA	1121	1121	3.45974
chr9	123936286	123937285	1000	*	1821	NA	1122	1122	3.45958
chr17	78997987	78998986	1000	*	524	NA	1123	1123	3.45956
chr1	53850852	53851851	1000	*	22577	NA	1124	1124	3.45857
chr18	79062010	79063009	1000	*	2636	NA	1125	1125	3.4581
chr5	93134003	93135002	1000	*	1394	NA	1126	1126	3.45805
chr9	111148950	111149949	1000	*	569	NA	1127	1127	3.4579
chr14	106029806	106030805	1000	*	619	NA	1128	1128	3.45722
chr10	96274738	96275737	1000	*	773	NA	1129	1129	3.45687
chr2	22796167	22797166	1000	*	495	NA	1130	1130	3.4565
chr5	64471771	64472770	1000	*	1041	NA	1131	1131	3.45596
chr19	41328492	41329491	1000	*	3120	NA	1132	1132	3.45567
chr7	90134231	90135230	1000	*	2277	NA	1133	1133	3.4556
chr4	7440917	7441916	1000	*	1157	NA	1134	1134	3.45347
chr19	9054879	9055878	1000	*	439	NA	1135	1135	3.45266
chr7	75575083	75576082	1000	*	2138	NA	1136	1136	3.4522
chr11	118227443	118228442	1000	*	13968	NA	1137	1137	3.45178
chr14	20171999	20172998	1000	*	4663	NA	1138	1138	3.45099
chr2	128389884	128390883	1000	*	3505	NA	1139	1139	3.45067
chr1	120055196	120056195	1000	*	17457	NA	1140	1140	3.45015
chr2	80684341	80685340	1000	*	2420	NA	1141	1141	3.44988
chr13	97439864	97440863	1000	*	695	NA	1142	1142	3.44969
chr11	16987537	16988536	1000	*	1842	NA	1143	1143	3.44934
chr10	39490605	39491604	1000	*	626	NA	1144	1144	3.44878
chr13	85505644	85506643	1000	*	67	NA	1145	1145	3.44853
chr2	128380456	128381455	1000	*	14114	NA	1146	1146	3.44776
chr1	64526969	64527968	1000	*	1064	NA	1147	1147	3.44724
chr15	60113209	60114208	1000	*	835	NA	1148	1148	3.44724
chr12	21462304	21463303	1000	*	4558	NA	1149	1149	3.44677
chr17	36000809	36001808	1000	*	2016	NA	1150	1150	3.44671
chr3	103780396	103781395	1000	*	1610	NA	1151	1151	3.4467
chr11	67511948	67512947	1000	*	377	NA	1152	1152	3.44589
chr5	21247080	21248079	1000	*	639	NA	1153	1153	3.44585
chr8	122560864	122561863	1000	*	26744	NA	1154	1154	3.44533
chr18	79258564	79259563	1000	*	600	NA	1155	1155	3.44521
chrX	167091619	167092618	1000	*	17416	NA	1156	1156	3.44504
chr10	56852213	56853212	1000	*	3258	NA	1157	1157	3.44494
chr1	164964083	164965082	1000	*	1801	NA	1158	1158	3.44493
chr10	53769617	53770616	1000	*	1788	NA	1159	1159	3.44436
chr1	144300762	144301761	1000	*	9214	NA	1160	1160	3.44304
chr1	138185602	138186601	1000	*	3930	NA	1161	1161	3.44271
chr2	46370725	46371724	1000	*	925	NA	1162	1162	3.44237
chr2	29724561	29725560	1000	*	3765	NA	1163	1163	3.44213
chr13	110562243	110563242	1000	*	1167	NA	1164	1164	3.44172
chr14	27375832	27376831	1000	*	1455	NA	1165	1165	3.44071
chr6	129229329	129230328	1000	*	3465	NA	1166	1166	3.43978
chr3	142862909	142863908	1000	*	1305	NA	1167	1167	3.43905
chr16	24215122	24216121	1000	*	356	NA	1168	1168	3.4382
chr19	53191254	53192253	1000	*	326	NA	1169	1169	3.43776
chr8	128662752	128663751	1000	*	6503	NA	1170	1170	3.43771
chr19	46733257	46734256	1000	*	7685	NA	1171	1171	3.43743
chr9	108148589	108149588	1000	*	3964	NA	1172	1172	3.437
chr16	92798937	92799936	1000	*	2869	NA	1173	1173	3.43694
chr12	89723609	89724608	1000	*	4910	NA	1174	1174	3.43689
chr16	18492975	18493974	1000	*	3937	NA	1175	1175	3.43656
chr8	128593859	128594858	1000	*	739	NA	1176	1176	3.43629
chr1	106647066	106648065	1000	*	2120	NA	1177	1177	3.43624
chr2	3736904	3737903	1000	*	2252	NA	1178	1178	3.43599
chr13	85430673	85431672	1000	*	89	NA	1179	1179	3.43507
chr5	37045270	37046269	1000	*	383	NA	1180	1180	3.43506
chr1	182519656	182520655	1000	*	6684	NA	1181	1181	3.43482
chr10	93191611	93192610	1000	*	2456	NA	1182	1182	3.434
chr7	114172459	114173458	1000	*	319	NA	1183	1183	3.4339
chr14	78908956	78909955	1000	*	2661	NA	1184	1184	3.43372
chr6	67435280	67436279	1000	*	2218	NA	1185	1185	3.43312
chr4	7594766	7595765	1000	*	2128	NA	1186	1186	3.43278
chr18	4346041	4347040	1000	*	3171	NA	1187	1187	3.43238
chr14	77867292	77868291	1000	*	119	NA	1188	1188	3.4323
chr19	43193326	43194325	1000	*	2734	NA	1189	1189	3.43206
chr7	106548711	106549710	1000	*	5096	NA	1190	1190	3.43191
chr17	78997160	78998159	1000	*	1042	NA	1191	1191	3.43103
chr8	94398195	94399194	1000	*	14818	NA	1192	1192	3.43086
chr7	78737350	78738349	1000	*	6040	NA	1193	1193	3.43084
chr12	115311709	115312708	1000	*	2885	NA	1194	1194	3.43065
chr10	118102884	118103883	1000	*	12969	NA	1195	1195	3.42967
chr8	128652084	128653083	1000	*	294	NA	1196	1196	3.42919
chr4	62593475	62594474	1000	*	14583	NA	1197	1197	3.42915
chr11	78596359	78597358	1000	*	4750	NA	1198	1198	3.4289
chr16	32650841	32651840	1000	*	20404	NA	1199	1199	3.42871
chr8	10480498	10481497	1000	*	14630	NA	1200	1200	3.42831
chr18	79076966	79077965	1000	*	2842	NA	1201	1201	3.42813
chr3	142242933	142243932	1000	*	2545	NA	1202	1202	3.4274
chr6	43746787	43747786	1000	*	1584	NA	1203	1203	3.42734
chr11	83625132	83626131	1000	*	1977	NA	1204	1204	3.42675
chr19	21913312	21914311	1000	*	2676	NA	1205	1205	3.42636
chr2	6695599	6696598	1000	*	1819	NA	1206	1206	3.42612
chr9	32925918	32926917	1000	*	11183	NA	1207	1207	3.4249
chr5	124046661	124047660	1000	*	504	NA	1208	1208	3.42464
chr6	50378938	50379937	1000	*	2773	NA	1209	1209	3.42431
chr1	171630936	171631935	1000	*	26628	NA	1210	1210	3.42425
chr1	138142735	138143734	1000	*	632	NA	1211	1211	3.4239
chr7	58823502	58824501	1000	*	1076	NA	1212	1212	3.42338
chr14	106024466	106025465	1000	*	5702	NA	1213	1213	3.42334
chr5	72853113	72854112	1000	*	2283	NA	1214	1214	3.42314
chr17	35763694	35764693	1000	*	6576	NA	1215	1215	3.42308
chr3	61659530	61660529	1000	*	1290	NA	1216	1216	3.42245
chr4	53920399	53921398	1000	*	2403	NA	1217	1217	3.42229
chr6	30228673	30229672	1000	*	1563	NA	1218	1218	3.42224
chr17	73951721	73952720	1000	*	38623	NA	1219	1219	3.42159
chr11	21166455	21167454	1000	*	3621	NA	1220	1220	3.42084
chr15	52750505	52751504	1000	*	1083	NA	1221	1221	3.42072
chr12	25315672	25316671	1000	*	108	NA	1222	1222	3.41851
chr1	180397401	180398400	1000	*	3962	NA	1223	1223	3.41743
chr5	121198042	121199041	1000	*	11743	NA	1224	1224	3.41648
chr9	32912666	32913665	1000	*	895	NA	1225	1225	3.4163
chr14	78910029	78911028	1000	*	4393	NA	1226	1226	3.41599
chr12	12562015	12563014	1000	*	12937	NA	1227	1227	3.41591
chr2	22794883	22795882	1000	*	5930	NA	1228	1228	3.41485
chr2	11202991	11203990	1000	*	1052	NA	1229	1229	3.41346
chr12	34806252	34807251	1000	*	5297	NA	1230	1230	3.41278
chr9	61662065	61663064	1000	*	2164	NA	1231	1231	3.41173
chr9	64813912	64814911	1000	*	6394	NA	1232	1232	3.41097
chr10	93177598	93178597	1000	*	992	NA	1233	1233	3.41078
chr1	21316946	21317945	1000	*	2195	NA	1234	1234	3.41074
chr6	119201380	119202379	1000	*	366	NA	1235	1235	3.41045
chr6	54811274	54812273	1000	*	764	NA	1236	1236	3.40985
chr10	21905385	21906384	1000	*	15232	NA	1237	1237	3.40943
chr3	60413490	60414489	1000	*	7048	NA	1238	1238	3.40905
chr12	115257403	115258402	1000	*	30103	NA	1239	1239	3.40861
chr19	57084468	57085467	1000	*	9953	NA	1240	1240	3.40845
chr16	64800013	64801012	1000	*	4656	NA	1241	1241	3.40642
chr1	43519906	43520905	1000	*	6283	NA	1242	1242	3.40603
chr2	164079298	164080297	1000	*	2468	NA	1243	1243	3.4058
chr17	72931964	72932963	1000	*	625	NA	1244	1244	3.40486
chr12	115023468	115024467	1000	*	448	NA	1245	1245	3.40468
chr3	60513670	60514669	1000	*	9940	NA	1246	1246	3.40454
chr9	80280656	80281655	1000	*	25041	NA	1247	1247	3.40443
chr1	92805023	92806022	1000	*	622	NA	1248	1248	3.40415
chr14	27248995	27249994	1000	*	1043	NA	1249	1249	3.40364
chr7	66227381	66228380	1000	*	2121	NA	1250	1250	3.40272
chr1	138177529	138178528	1000	*	3152	NA	1251	1251	3.40249
chr16	52088347	52089346	1000	*	2802	NA	1252	1252	3.40211
chr17	51892305	51893304	1000	*	3218	NA	1253	1253	3.40208
chr7	78721212	78722211	1000	*	6612	NA	1254	1254	3.40103
chr11	97140933	97141932	1000	*	1652	NA	1255	1255	3.40095
chr2	166446253	166447252	1000	*	17607	NA	1256	1256	3.40075
chr11	54727987	54728986	1000	*	11976	NA	1257	1257	3.40055
chr3	69157609	69158608	1000	*	5742	NA	1258	1258	3.40055
chr3	142545125	142546124	1000	*	175	NA	1259	1259	3.40015
chr3	52881906	52882905	1000	*	12195	NA	1260	1260	3.3995
chr5	124024644	124025643	1000	*	6825	NA	1261	1261	3.39786
chr12	25366943	25367942	1000	*	260	NA	1262	1262	3.39657
chr7	66225481	66226480	1000	*	268	NA	1263	1263	3.3965
chr2	166491613	166492612	1000	*	8261	NA	1264	1264	3.39599
chr8	86852280	86853279	1000	*	825	NA	1265	1265	3.39539
chr5	105515092	105516091	1000	*	24796	NA	1266	1266	3.39479
chr7	75794218	75795217	1000	*	22762	NA	1267	1267	3.39476
chr13	98809965	98810964	1000	*	28199	NA	1268	1268	3.39467
chr4	95194601	95195600	1000	*	4888	NA	1269	1269	3.39337
chr13	24514795	24515794	1000	*	303	NA	1270	1270	3.39324
chr6	41550485	41551484	1000	*	1208	NA	1271	1271	3.39214
chr18	75214933	75215932	1000	*	10493	NA	1272	1272	3.39188
chr18	38379852	38380851	1000	*	21594	NA	1273	1273	3.39147
chr12	25362417	25363416	1000	*	62	NA	1274	1274	3.39124
chr4	59261830	59262829	1000	*	4354	NA	1275	1275	3.39089
chr9	41220873	41221872	1000	*	5120	NA	1276	1276	3.39064
chr13	30626653	30627652	1000	*	4662	NA	1277	1277	3.39047
chr10	39435800	39436799	1000	*	1310	NA	1278	1278	3.39011
chr15	61447398	61448397	1000	*	3075	NA	1279	1279	3.38976
chr11	11517660	11518659	1000	*	170	NA	1280	1280	3.38911
chr13	91092829	91093828	1000	*	412	NA	1281	1281	3.38881
chr19	40684810	40685809	1000	*	384	NA	1282	1282	3.38875
chr4	101247160	101248159	1000	*	1519	NA	1283	1283	3.38766
chr18	35909992	35910991	1000	*	1415	NA	1284	1284	3.38752
chr1	16641780	16642779	1000	*	7155	NA	1285	1285	3.3867
chr1	127296505	127297504	1000	*	27969	NA	1286	1286	3.3865
chr2	45138544	45139543	1000	*	297	NA	1287	1287	3.3864
chr3	59259032	59260031	1000	*	3421	NA	1288	1288	3.38638
chr9	111045836	111046835	1000	*	10765	NA	1289	1289	3.38614
chr1	37326743	37327742	1000	*	10117	NA	1290	1290	3.38526
chr10	78304785	78305784	1000	*	510	NA	1291	1291	3.38473
chr11	116376920	116377919	1000	*	24516	NA	1292	1292	3.38427
chr5	54105334	54106333	1000	*	1882	NA	1293	1293	3.38408
chr12	35749956	35750955	1000	*	4901	NA	1294	1294	3.38342
chr6	127573884	127574883	1000	*	1740	NA	1295	1295	3.38302
chr18	35936057	35937056	1000	*	973	NA	1296	1296	3.38282
chr4	7342240	7343239	1000	*	2660	NA	1297	1297	3.38211
chr5	146781439	146782438	1000	*	2020	NA	1298	1298	3.38192
chr13	19517650	19518649	1000	*	11327	NA	1299	1299	3.38175
chr3	137952921	137953920	1000	*	742	NA	1300	1300	3.38102
chr7	75793662	75794661	1000	*	7985	NA	1301	1301	3.38102
chr2	173454925	173455924	1000	*	5281	NA	1302	1302	3.38084
chr2	3724846	3725845	1000	*	903	NA	1303	1303	3.38041
chr13	46337422	46338421	1000	*	1565	NA	1304	1304	3.37973
chr6	54954320	54955319	1000	*	683	NA	1305	1305	3.37955
chr4	145235800	145236799	1000	*	778	NA	1306	1306	3.37921
chr1	164082700	164083699	1000	*	838	NA	1307	1307	3.37906
chr2	152789103	152790102	1000	*	9491	NA	1308	1308	3.37792
chr10	39517306	39518305	1000	*	1065	NA	1309	1309	3.37784
chr13	43484966	43485965	1000	*	2397	NA	1310	1310	3.3777
chr1	36911293	36912292	1000	*	83	NA	1311	1311	3.37688
chr16	56133665	56134664	1000	*	2961	NA	1312	1312	3.37666
chr1	60743981	60744980	1000	*	352	NA	1313	1313	3.37575
chr19	53433804	53434803	1000	*	6793	NA	1314	1314	3.37555
chr18	4303661	4304660	1000	*	996	NA	1315	1315	3.37537
chr8	46919747	46920746	1000	*	1061	NA	1316	1316	3.37478
chr19	57095098	57096097	1000	*	3264	NA	1317	1317	3.37401
chr7	141302683	141303682	1000	*	795	NA	1318	1318	3.37396
chr15	66849446	66850445	1000	*	289	NA	1319	1319	3.37395
chr11	98526410	98527409	1000	*	15528	NA	1320	1320	3.37309
chr11	11711531	11712530	1000	*	2049	NA	1321	1321	3.37283
chr8	36082325	36083324	1000	*	17677	NA	1322	1322	3.37281
chr4	134919781	134920780	1000	*	7847	NA	1323	1323	3.37281
chr8	86855715	86856714	1000	*	11079	NA	1324	1324	3.37253
chr7	44740969	44741968	1000	*	16584	NA	1325	1325	3.37227
chr1	80722315	80723314	1000	*	1100	NA	1326	1326	3.37222
chr19	10991448	10992447	1000	*	42	NA	1327	1327	3.372
chr4	135017716	135018715	1000	*	191	NA	1328	1328	3.3713
chr3	137859999	137860998	1000	*	2115	NA	1329	1329	3.37078
chr10	75293889	75294888	1000	*	10467	NA	1330	1330	3.37065
chr4	140952059	140953058	1000	*	20378	NA	1331	1331	3.37062
chr7	51724719	51725718	1000	*	541	NA	1332	1332	3.37033
chr14	53903017	53904016	1000	*	4647	NA	1333	1333	3.37016
chr11	98540688	98541687	1000	*	5933	NA	1334	1334	3.36911
chr10	117899097	117900096	1000	*	1282	NA	1335	1335	3.36904
chr8	120696743	120697742	1000	*	551	NA	1336	1336	3.36844
chr6	113663053	113664052	1000	*	1293	NA	1337	1337	3.36841
chr2	166399002	166400001	1000	*	2503	NA	1338	1338	3.36808
chr1	80638548	80639547	1000	*	912	NA	1339	1339	3.36756
chr1	51466330	51467329	1000	*	515	NA	1340	1340	3.36754
chr10	28593509	28594508	1000	*	5939	NA	1341	1341	3.36751
chr13	113061346	113062345	1000	*	10747	NA	1342	1342	3.36748
chr11	83540649	83541648	1000	*	2326	NA	1343	1343	3.36648
chr5	107755852	107756851	1000	*	6290	NA	1344	1344	3.36644
chr13	85418495	85419494	1000	*	797	NA	1345	1345	3.36629
chr12	69512785	69513784	1000	*	3823	NA	1346	1346	3.36595
chr2	150308073	150309072	1000	*	5468	NA	1347	1347	3.36528
chr7	75644330	75645329	1000	*	911	NA	1348	1348	3.36524
chr18	39718764	39719763	1000	*	478	NA	1349	1349	3.36466
chr6	129608123	129609122	1000	*	19558	NA	1350	1350	3.36453
chr3	19410903	19411902	1000	*	6157	NA	1351	1351	3.36388
chr9	45273924	45274923	1000	*	358	NA	1352	1352	3.36351
chr16	24165227	24166226	1000	*	2599	NA	1353	1353	3.36341
chr4	86721465	86722464	1000	*	3456	NA	1354	1354	3.36302
chr1	138151878	138152877	1000	*	1280	NA	1355	1355	3.36274
chr19	41342432	41343431	1000	*	31120	NA	1356	1356	3.36253
chr12	92703402	92704401	1000	*	5815	NA	1357	1357	3.36244
chr6	65611628	65612627	1000	*	560	NA	1358	1358	3.36211
chr13	33048034	33049033	1000	*	16855	NA	1359	1359	3.36184
chr15	66806051	66807050	1000	*	2933	NA	1360	1360	3.36078
chr2	158718201	158719200	1000	*	3173	NA	1361	1361	3.36061
chr13	91610201	91611200	1000	*	7297	NA	1362	1362	3.35999
chr6	130386742	130387741	1000	*	16775	NA	1363	1363	3.35993
chr12	85944195	85945194	1000	*	216	NA	1364	1364	3.35982
chr11	83556640	83557639	1000	*	3267	NA	1365	1365	3.35929
chr13	40922198	40923197	1000	*	664	NA	1366	1366	3.35918
chr5	96918922	96919921	1000	*	3050	NA	1367	1367	3.35914
chr13	93765502	93766501	1000	*	1952	NA	1368	1368	3.35893
chr17	71224374	71225373	1000	*	3643	NA	1369	1369	3.35862
chr17	84140693	84141692	1000	*	1392	NA	1370	1370	3.35858
chr13	30825111	30826110	1000	*	1654	NA	1371	1371	3.35796
chr4	6950091	6951090	1000	*	871	NA	1372	1372	3.35766
chr5	21226937	21227936	1000	*	4196	NA	1373	1373	3.35762
chr13	101657844	101658843	1000	*	273	NA	1374	1374	3.35759
chr2	6695148	6696147	1000	*	2586	NA	1375	1375	3.35746
chr7	66187933	66188932	1000	*	344	NA	1376	1376	3.35611
chr5	112242051	112243050	1000	*	1051	NA	1377	1377	3.35603
chr1	151893639	151894638	1000	*	8017	NA	1378	1378	3.35595
chr7	64050758	64051757	1000	*	736	NA	1379	1379	3.35568
chr8	128652498	128653497	1000	*	863	NA	1380	1380	3.35559
chr4	135067068	135068067	1000	*	4299	NA	1381	1381	3.35548
chr17	71287859	71288858	1000	*	6224	NA	1382	1382	3.35437
chr3	27329611	27330610	1000	*	616	NA	1383	1383	3.35433
chr1	92103757	92104756	1000	*	975	NA	1384	1384	3.35418
chr18	80535572	80536571	1000	*	15229	NA	1385	1385	3.35417
chr17	7875922	7876921	1000	*	1425	NA	1386	1386	3.35408
chr1	160805066	160806065	1000	*	3727	NA	1387	1387	3.35338
chr1	138327180	138328179	1000	*	10474	NA	1388	1388	3.35323
chr5	21260577	21261576	1000	*	32982	NA	1389	1389	3.35318
chr3	35747285	35748284	1000	*	2027	NA	1390	1390	3.35282
chr2	25157342	25158341	1000	*	2268	NA	1391	1391	3.35235
chr6	59417289	59418288	1000	*	606	NA	1392	1392	3.3521
chr11	83556101	83557100	1000	*	1347	NA	1393	1393	3.35168
chr3	103855535	103856534	1000	*	1716	NA	1394	1394	3.35163
chr5	31633695	31634694	1000	*	1325	NA	1395	1395	3.35078
chr11	79658106	79659105	1000	*	13596	NA	1396	1396	3.35068
chr16	93244046	93245045	1000	*	558	NA	1397	1397	3.34975
chr8	46869219	46870218	1000	*	8602	NA	1398	1398	3.34911
chr1	143465523	143466522	1000	*	1775	NA	1399	1399	3.34873
chr6	103339516	103340515	1000	*	11173	NA	1400	1400	3.34869
chr16	52089759	52090758	1000	*	805	NA	1401	1401	3.34821
chr15	64211537	64212536	1000	*	8168	NA	1402	1402	3.34782
chrX	113866043	113867042	1000	*	4683	NA	1403	1403	3.34639
chr3	126572504	126573503	1000	*	5658	NA	1404	1404	3.34618
chr10	18924343	18925342	1000	*	798	NA	1405	1405	3.34608
chr9	72465492	72466491	1000	*	33168	NA	1406	1406	3.34607
chr13	101735356	101736355	1000	*	812	NA	1407	1407	3.34599
chr4	102498627	102499626	1000	*	653	NA	1408	1408	3.3452
chr9	90247053	90248052	1000	*	2369	NA	1409	1409	3.34513
chr8	117280230	117281229	1000	*	1560	NA	1410	1410	3.34476
chr2	167336441	167337440	1000	*	2619	NA	1411	1411	3.34422
chr11	118134948	118135947	1000	*	500	NA	1412	1412	3.34412
chr13	114895550	114896549	1000	*	208	NA	1413	1413	3.34405
chr2	60902162	60903161	1000	*	1298	NA	1414	1414	3.34372
chr1	88682160	88683159	1000	*	2736	NA	1415	1415	3.34356
chr5	38864434	38865433	1000	*	10104	NA	1416	1416	3.34306
chr18	34780843	34781842	1000	*	3390	NA	1417	1417	3.34272
chr5	122242373	122243372	1000	*	266	NA	1418	1418	3.34264
chr2	29677524	29678523	1000	*	1070	NA	1419	1419	3.34235
chr6	8645427	8646426	1000	*	509	NA	1420	1420	3.34202
chr11	5998273	5999272	1000	*	1101	NA	1421	1421	3.34178
chr7	102337583	102338582	1000	*	6466	NA	1422	1422	3.34082
chr6	128734254	128735253	1000	*	808	NA	1423	1423	3.33986
chr12	116313549	116314548	1000	*	12661	NA	1424	1424	3.33971
chr11	63976498	63977497	1000	*	967	NA	1425	1425	3.3396
chr11	30181566	30182565	1000	*	1148	NA	1426	1426	3.33951
chr7	66253903	66254902	1000	*	8049	NA	1427	1427	3.33854
chr14	121408678	121409677	1000	*	613	NA	1428	1428	3.33834
chr11	106540570	106541569	1000	*	1163	NA	1429	1429	3.33758
chr8	25611596	25612595	1000	*	349	NA	1430	1430	3.33725
chr13	85502545	85503544	1000	*	1216	NA	1431	1431	3.33681
chr14	61620002	61621001	1000	*	5726	NA	1432	1432	3.33633
chr5	62751218	62752217	1000	*	2249	NA	1433	1433	3.33626
chr2	48467996	48468995	1000	*	5097	NA	1434	1434	3.33586
chr9	92274122	92275121	1000	*	3559	NA	1435	1435	3.33578
chr5	64478381	64479380	1000	*	1912	NA	1436	1436	3.33522
chr6	67367243	67368242	1000	*	5355	NA	1437	1437	3.33513
chr10	39469260	39470259	1000	*	2671	NA	1438	1438	3.33486
chr2	11218824	11219823	1000	*	157	NA	1439	1439	3.33471
chr11	52299254	52300253	1000	*	16607	NA	1440	1440	3.33465
chr13	91091320	91092319	1000	*	8289	NA	1441	1441	3.33401
chr1	85997658	85998657	1000	*	3848	NA	1442	1442	3.334
chr10	61267071	61268070	1000	*	23426	NA	1443	1443	3.33328
chr7	128133320	128134319	1000	*	415	NA	1444	1444	3.33229
chr15	36614323	36615322	1000	*	3379	NA	1445	1445	3.33218
chr10	44845493	44846492	1000	*	1457	NA	1446	1446	3.33209
chr4	46556557	46557556	1000	*	1628	NA	1447	1447	3.33198
chr14	54229567	54230566	1000	*	1624	NA	1448	1448	3.33158
chr9	108149474	108150473	1000	*	262	NA	1449	1449	3.33115
chr11	98468282	98469281	1000	*	457	NA	1450	1450	3.33034
chr15	5513992	5514991	1000	*	10319	NA	1451	1451	3.32991
chr11	100933716	100934715	1000	*	3383	NA	1452	1452	3.32939
chr6	67337714	67338713	1000	*	731	NA	1453	1453	3.32874
chr5	124346505	124347504	1000	*	3291	NA	1454	1454	3.32842
chr13	93764344	93765343	1000	*	24976	NA	1455	1455	3.32817
chr11	75153871	75154870	1000	*	3207	NA	1456	1456	3.328
chr8	72352437	72353436	1000	*	2026	NA	1457	1457	3.32779
chr6	134066753	134067752	1000	*	3251	NA	1458	1458	3.32774
chr1	138129208	138130207	1000	*	2019	NA	1459	1459	3.32774
chr18	50022131	50023130	1000	*	9137	NA	1460	1460	3.32712
chr6	119198506	119199505	1000	*	17836	NA	1461	1461	3.32609
chr5	105114476	105115475	1000	*	1040	NA	1462	1462	3.32608
chr19	27967275	27968274	1000	*	10008	NA	1463	1463	3.32565
chr1	165012048	165013047	1000	*	3665	NA	1464	1464	3.32428
chr9	33007385	33008384	1000	*	1714	NA	1465	1465	3.32396
chr10	98773196	98774195	1000	*	3276	NA	1466	1466	3.32363
chr1	138139243	138140242	1000	*	2771	NA	1467	1467	3.32359
chr15	60114318	60115317	1000	*	803	NA	1468	1468	3.32341
chr16	57471971	57472970	1000	*	429	NA	1469	1469	3.32331
chr2	25156709	25157708	1000	*	2430	NA	1470	1470	3.3232
chr5	139196854	139197853	1000	*	8642	NA	1471	1471	3.32256
chr12	25299257	25300256	1000	*	2201	NA	1472	1472	3.32241
chr1	151960136	151961135	1000	*	4236	NA	1473	1473	3.32231
chr12	102329721	102330720	1000	*	2179	NA	1474	1474	3.32176
chr11	106535753	106536752	1000	*	15203	NA	1475	1475	3.32137
chr7	72280162	72281161	1000	*	3096	NA	1476	1476	3.32113
chr10	96275040	96276039	1000	*	3049	NA	1477	1477	3.32107
chr1	164975549	164976548	1000	*	8195	NA	1478	1478	3.32106
chr2	154732558	154733557	1000	*	6207	NA	1479	1479	3.321
chr1	138251209	138252208	1000	*	2193	NA	1480	1480	3.32093
chr17	64617512	64618511	1000	*	665	NA	1481	1481	3.32044
chr6	113668470	113669469	1000	*	10245	NA	1482	1482	3.31973
chr2	31082389	31083388	1000	*	11809	NA	1483	1483	3.31952
chr19	41364198	41365197	1000	*	1296	NA	1484	1484	3.31946
chr2	18918390	18919389	1000	*	1465	NA	1485	1485	3.31937
chr2	3718508	3719507	1000	*	1879	NA	1486	1486	3.31928
chr9	41222325	41223324	1000	*	821	NA	1487	1487	3.31893
chr15	62808127	62809126	1000	*	309	NA	1488	1488	3.31843
chr3	14894602	14895601	1000	*	2064	NA	1489	1489	3.31821
chr8	123027877	123028876	1000	*	17110	NA	1490	1490	3.31797
chr8	57408643	57409642	1000	*	8359	NA	1491	1491	3.31795
chr11	70897300	70898299	1000	*	3785	NA	1492	1492	3.31752
chr8	128547075	128548074	1000	*	507	NA	1493	1493	3.31738
chr10	61263371	61264370	1000	*	17688	NA	1494	1494	3.31729
chr13	101656464	101657463	1000	*	1553	NA	1495	1495	3.31728
chr4	46525101	46526100	1000	*	1856	NA	1496	1496	3.31683
chr18	4302544	4303543	1000	*	14712	NA	1497	1497	3.31647
chr6	122291745	122292744	1000	*	4775	NA	1498	1498	3.31644
chr1	125437702	125438701	1000	*	17641	NA	1499	1499	3.31576
chr6	108671842	108672841	1000	*	836	NA	1500	1500	3.31542
chr16	38402219	38403218	1000	*	1810	NA	1501	1501	3.31398
chr14	27412432	27413431	1000	*	11223	NA	1502	1502	3.31366
chr15	27598668	27599667	1000	*	3624	NA	1503	1503	3.31344
chr8	46851249	46852248	1000	*	686	NA	1504	1504	3.31321
chr10	117807752	117808751	1000	*	4108	NA	1505	1505	3.31278
chr6	129823799	129824798	1000	*	11397	NA	1506	1506	3.31244
chr10	39392353	39393352	1000	*	3312	NA	1507	1507	3.31243
chr12	93230158	93231157	1000	*	1536	NA	1508	1508	3.31176
chr1	40479337	40480336	1000	*	5950	NA	1509	1509	3.31173
chr9	61627492	61628491	1000	*	775	NA	1510	1510	3.31164
chr6	144919139	144920138	1000	*	1032	NA	1511	1511	3.31143
chr4	46565095	46566094	1000	*	6339	NA	1512	1512	3.31136
chr10	17728252	17729251	1000	*	3319	NA	1513	1513	3.3108
chr12	92625243	92626242	1000	*	2577	NA	1514	1514	3.31071
chr1	170272940	170273939	1000	*	15032	NA	1515	1515	3.31002
chr18	79262843	79263842	1000	*	1796	NA	1516	1516	3.30911
chr10	51452782	51453781	1000	*	877	NA	1517	1517	3.3078
chr17	30337215	30338214	1000	*	1446	NA	1518	1518	3.30763
chr5	21254899	21255898	1000	*	16841	NA	1519	1519	3.30751
chr15	12423821	12424820	1000	*	6189	NA	1520	1520	3.30703
chr1	80362287	80363286	1000	*	2288	NA	1521	1521	3.30662
chr1	85837685	85838684	1000	*	12966	NA	1522	1522	3.30638
chr4	145210881	145211880	1000	*	22727	NA	1523	1523	3.30461
chr5	31444090	31445089	1000	*	811	NA	1524	1524	3.3042
chr4	134753096	134754095	1000	*	9831	NA	1525	1525	3.30398
chr10	58463693	58464692	1000	*	4522	NA	1526	1526	3.30382
chr5	23720453	23721452	1000	*	1378	NA	1527	1527	3.30207
chr5	107757423	107758422	1000	*	1963	NA	1528	1528	3.30179
chr12	51856269	51857268	1000	*	2426	NA	1529	1529	3.30124
chr13	114918104	114919103	1000	*	2742	NA	1530	1530	3.30117
chr3	105795744	105796743	1000	*	2165	NA	1531	1531	3.30099
chr11	53795545	53796544	1000	*	1140	NA	1532	1532	3.30097
chr2	25147554	25148553	1000	*	1812	NA	1533	1533	3.30013
chr14	64627824	64628823	1000	*	11158	NA	1534	1534	3.29963
chr19	17319100	17320099	1000	*	1728	NA	1535	1535	3.29938
chr6	128790320	128791319	1000	*	8731	NA	1536	1536	3.29875
chr16	33397590	33398589	1000	*	1273	NA	1537	1537	3.29846
chr8	94364828	94365827	1000	*	7434	NA	1538	1538	3.29761
chr5	124033485	124034484	1000	*	528	NA	1539	1539	3.29688
chr4	140953386	140954385	1000	*	5090	NA	1540	1540	3.29592
chr19	57122452	57123451	1000	*	2291	NA	1541	1541	3.29438
chr11	86598268	86599267	1000	*	820	NA	1542	1542	3.29413
chr3	88413441	88414440	1000	*	1549	NA	1543	1543	3.29386
chr17	44458706	44459705	1000	*	7601	NA	1544	1544	3.29383
chr1	170235030	170236029	1000	*	7271	NA	1545	1545	3.29377
chr11	11740377	11741376	1000	*	2562	NA	1546	1546	3.29374
chr13	20801188	20802187	1000	*	2170	NA	1547	1547	3.29318
chr17	78994572	78995571	1000	*	28947	NA	1548	1548	3.29287
chr8	123039393	123040392	1000	*	32590	NA	1549	1549	3.29276
chr18	34783230	34784229	1000	*	24728	NA	1550	1550	3.29255
chr4	7341619	7342618	1000	*	243	NA	1551	1551	3.2925
chr11	21176388	21177387	1000	*	17336	NA	1552	1552	3.29241
chr3	21910713	21911712	1000	*	2208	NA	1553	1553	3.29235
chr10	59972262	59973261	1000	*	3118	NA	1554	1554	3.2919
chr7	75880939	75881938	1000	*	17528	NA	1555	1555	3.29143
chr3	146784071	146785070	1000	*	19441	NA	1556	1556	3.29137
chr4	145209504	145210503	1000	*	280	NA	1557	1557	3.29107
chr6	48710802	48711801	1000	*	5391	NA	1558	1558	3.29079
chr2	165169586	165170585	1000	*	30727	NA	1559	1559	3.29049
chr10	21205790	21206789	1000	*	1297	NA	1560	1560	3.29026
chr12	100710932	100711931	1000	*	18419	NA	1561	1561	3.28946
chr7	127165719	127166718	1000	*	6882	NA	1562	1562	3.28894
chr19	40684159	40685158	1000	*	17293	NA	1563	1563	3.28815
chr15	66824274	66825273	1000	*	6600	NA	1564	1564	3.28788
chr8	128608369	128609368	1000	*	2907	NA	1565	1565	3.28722
chr12	102370660	102371659	1000	*	3114	NA	1566	1566	3.28694
chr1	136683446	136684445	1000	*	409	NA	1567	1567	3.28688
chr16	64789432	64790431	1000	*	20044	NA	1568	1568	3.28684
chr9	110665350	110666349	1000	*	12615	NA	1569	1569	3.28581
chr13	108304221	108305220	1000	*	5607	NA	1570	1570	3.28547
chr11	22839651	22840650	1000	*	2725	NA	1571	1571	3.28539
chr5	72758838	72759837	1000	*	17861	NA	1572	1572	3.28536
chr11	86606259	86607258	1000	*	4133	NA	1573	1573	3.2853
chr1	138250722	138251721	1000	*	927	NA	1574	1574	3.28473
chr10	54037981	54038980	1000	*	3032	NA	1575	1575	3.2847
chr4	32364654	32365653	1000	*	21208	NA	1576	1576	3.2846
chr7	140207653	140208652	1000	*	8753	NA	1577	1577	3.28425
chr6	22358345	22359344	1000	*	2093	NA	1578	1578	3.28374
chr13	40923787	40924786	1000	*	7464	NA	1579	1579	3.28323
chr11	100933034	100934033	1000	*	7325	NA	1580	1580	3.28307
chr4	133837114	133838113	1000	*	5256	NA	1581	1581	3.28291
chr6	136935031	136936030	1000	*	2411	NA	1582	1582	3.28284
chr17	26571848	26572847	1000	*	2178	NA	1583	1583	3.28273
chr10	96724538	96725537	1000	*	15789	NA	1584	1584	3.2825
chr4	8927204	8928203	1000	*	13319	NA	1585	1585	3.28169
chr2	126475493	126476492	1000	*	3085	NA	1586	1586	3.28166
chr4	132041235	132042234	1000	*	3758	NA	1587	1587	3.28129
chr18	39011317	39012316	1000	*	4954	NA	1588	1588	3.28126
chr16	78557416	78558415	1000	*	2005	NA	1589	1589	3.28023
chr13	92240617	92241616	1000	*	1643	NA	1590	1590	3.28016
chr15	97421864	97422863	1000	*	7781	NA	1591	1591	3.28012
chr6	129232440	129233439	1000	*	28409	NA	1592	1592	3.27935
chr6	108906250	108907249	1000	*	6547	NA	1593	1593	3.27928
chr9	14296980	14297979	1000	*	287	NA	1594	1594	3.27884
chr2	166718944	166719943	1000	*	4438	NA	1595	1595	3.27806
chr2	26668490	26669489	1000	*	18014	NA	1596	1596	3.27782
chr1	64541902	64542901	1000	*	1922	NA	1597	1597	3.27764
chr14	27390273	27391272	1000	*	8090	NA	1598	1598	3.27758
chr2	29670130	29671129	1000	*	6116	NA	1599	1599	3.27688
chr7	63973385	63974384	1000	*	265	NA	1600	1600	3.27672
chr12	98213809	98214808	1000	*	4039	NA	1601	1601	3.27621
chr7	75794777	75795776	1000	*	11413	NA	1602	1602	3.27581
chr6	108540171	108541170	1000	*	9843	NA	1603	1603	3.27549
chr8	72343527	72344526	1000	*	7369	NA	1604	1604	3.275
chr19	10985461	10986460	1000	*	389	NA	1605	1605	3.27497
chr7	66175438	66176437	1000	*	589	NA	1606	1606	3.27457
chr11	70805550	70806549	1000	*	3738	NA	1607	1607	3.27415
chr1	138123809	138124808	1000	*	827	NA	1608	1608	3.27414
chr15	5509692	5510691	1000	*	22619	NA	1609	1609	3.27387
chr2	146423744	146424743	1000	*	1395	NA	1610	1610	3.27363
chr1	173451186	173452185	1000	*	10567	NA	1611	1611	3.27334
chr18	21009132	21010131	1000	*	8456	NA	1612	1612	3.27306
chr7	132801734	132802733	1000	*	644	NA	1613	1613	3.27298
chr11	73130769	73131768	1000	*	955	NA	1614	1614	3.27197
chr16	17015220	17016219	1000	*	6639	NA	1615	1615	3.27197
chr10	44401720	44402719	1000	*	1745	NA	1616	1616	3.27196
chr8	46781743	46782742	1000	*	12781	NA	1617	1617	3.27081
chr16	92880265	92881264	1000	*	2844	NA	1618	1618	3.27038
chr11	11714262	11715261	1000	*	320	NA	1619	1619	3.27004
chr19	57123554	57124553	1000	*	11584	NA	1620	1620	3.27004
chr1	52038933	52039932	1000	*	3101	NA	1621	1621	3.27002
chr3	96880553	96881552	1000	*	1330	NA	1622	1622	3.26997
chr11	86592767	86593766	1000	*	30239	NA	1623	1623	3.26983
chr10	96339500	96340499	1000	*	585	NA	1624	1624	3.26973
chr9	96582800	96583799	1000	*	6107	NA	1625	1625	3.26927
chr19	40665505	40666504	1000	*	4556	NA	1626	1626	3.26876
chr8	106053864	106054863	1000	*	26683	NA	1627	1627	3.26875
chr1	80637812	80638811	1000	*	502	NA	1628	1628	3.26858
chr18	88975204	88976203	1000	*	6867	NA	1629	1629	3.26804
chr17	35209892	35210891	1000	*	31800	NA	1630	1630	3.26752
chr6	113649155	113650154	1000	*	1729	NA	1631	1631	3.26707
chr2	65550301	65551300	1000	*	2158	NA	1632	1632	3.26704
chr11	117321283	117322282	1000	*	10221	NA	1633	1633	3.26656
chr7	127220098	127221097	1000	*	1381	NA	1634	1634	3.26632
chr16	5029550	5030549	1000	*	1346	NA	1635	1635	3.26581
chr1	40393006	40394005	1000	*	531	NA	1636	1636	3.26539
chr9	14284960	14285959	1000	*	7363	NA	1637	1637	3.26447
chr1	144200195	144201194	1000	*	652	NA	1638	1638	3.26421
chr7	90003142	90004141	1000	*	21801	NA	1639	1639	3.26408
chr15	35662170	35663169	1000	*	12750	NA	1640	1640	3.26331
chr8	36112379	36113378	1000	*	16399	NA	1641	1641	3.26322
chr16	78546613	78547612	1000	*	5262	NA	1642	1642	3.26319
chr15	5694663	5695662	1000	*	2237	NA	1643	1643	3.26316
chr2	117433175	117434174	1000	*	4386	NA	1644	1644	3.26296
chr10	93104042	93105041	1000	*	14423	NA	1645	1645	3.26256
chr15	3172168	3173167	1000	*	4179	NA	1646	1646	3.26207
chr12	85945056	85946055	1000	*	1426	NA	1647	1647	3.26166
chr3	95385360	95386359	1000	*	2837	NA	1648	1648	3.26138
chr1	138138727	138139726	1000	*	10515	NA	1649	1649	3.26128
chr2	165982413	165983412	1000	*	32386	NA	1650	1650	3.26094
chr5	62715402	62716401	1000	*	3931	NA	1651	1651	3.26087
chr9	118420677	118421676	1000	*	1537	NA	1652	1652	3.26043
chr2	79269842	79270841	1000	*	3311	NA	1653	1653	3.26031
chr13	113104487	113105486	1000	*	13242	NA	1654	1654	3.26018
chr1	36266027	36267026	1000	*	945	NA	1655	1655	3.26009
chr10	75282396	75283395	1000	*	3898	NA	1656	1656	3.26005
chr4	137373522	137374521	1000	*	1481	NA	1657	1657	3.25951
chr11	83578790	83579789	1000	*	561	NA	1658	1658	3.25933
chr4	7751647	7752646	1000	*	1693	NA	1659	1659	3.25932
chr1	52365961	52366960	1000	*	15610	NA	1660	1660	3.25914
chr8	120715631	120716630	1000	*	907	NA	1661	1661	3.25905
chr5	72162660	72163659	1000	*	16972	NA	1662	1662	3.25865
chr1	52363376	52364375	1000	*	220	NA	1663	1663	3.25864
chr4	59336791	59337790	1000	*	305	NA	1664	1664	3.25818
chr2	60903829	60904828	1000	*	1060	NA	1665	1665	3.25805
chr3	69202605	69203604	1000	*	3732	NA	1666	1666	3.25793
chr2	31107882	31108881	1000	*	10556	NA	1667	1667	3.25776
chr9	66281268	66282267	1000	*	6308	NA	1668	1668	3.25774
chr10	88427761	88428760	1000	*	16190	NA	1669	1669	3.25698
chr9	61706053	61707052	1000	*	915	NA	1670	1670	3.25599
chr4	6474062	6475061	1000	*	540	NA	1671	1671	3.25557
chr1	86267157	86268156	1000	*	1137	NA	1672	1672	3.25557
chr10	44537392	44538391	1000	*	4063	NA	1673	1673	3.25535
chr7	66151286	66152285	1000	*	656	NA	1674	1674	3.25522
chr5	21257416	21258415	1000	*	3708	NA	1675	1675	3.25499
chr4	59223768	59224767	1000	*	770	NA	1676	1676	3.25497
chr2	166469141	166470140	1000	*	20901	NA	1677	1677	3.25478
chrX	153886908	153887907	1000	*	3375	NA	1678	1678	3.25473
chr2	31108781	31109780	1000	*	3036	NA	1679	1679	3.25402
chr18	39481720	39482719	1000	*	1333	NA	1680	1680	3.25389
chr4	139205942	139206941	1000	*	6666	NA	1681	1681	3.25333
chr1	181860398	181861397	1000	*	27685	NA	1682	1682	3.25327
chr11	97140398	97141397	1000	*	1508	NA	1683	1683	3.25324
chr15	41793793	41794792	1000	*	1764	NA	1684	1684	3.25214
chr10	128860926	128861925	1000	*	25896	NA	1685	1685	3.25213
chr1	92058416	92059415	1000	*	761	NA	1686	1686	3.252
chr7	100845152	100846151	1000	*	1217	NA	1687	1687	3.25139
chr6	125238368	125239367	1000	*	1451	NA	1688	1688	3.25135
chr13	45851393	45852392	1000	*	325	NA	1689	1689	3.25106
chr7	66187348	66188347	1000	*	2669	NA	1690	1690	3.25104
chr13	43239529	43240528	1000	*	21941	NA	1691	1691	3.25102
chr5	124074588	124075587	1000	*	139	NA	1692	1692	3.25085
chr15	64212709	64213708	1000	*	1198	NA	1693	1693	3.25083
chr16	45104607	45105606	1000	*	6434	NA	1694	1694	3.24969
chr7	135580563	135581562	1000	*	4215	NA	1695	1695	3.24968
chr1	87866375	87867374	1000	*	2706	NA	1696	1696	3.24926
chr8	34149229	34150228	1000	*	24783	NA	1697	1697	3.24922
chr8	109863139	109864138	1000	*	19738	NA	1698	1698	3.24906
chr19	29466668	29467667	1000	*	1621	NA	1699	1699	3.24877
chr6	103474930	103475929	1000	*	291	NA	1700	1700	3.24808
chr10	117982226	117983225	1000	*	15706	NA	1701	1701	3.24802
chr13	52807408	52808407	1000	*	8057	NA	1702	1702	3.24754
chr11	32561375	32562374	1000	*	3073	NA	1703	1703	3.24709
chr9	72100817	72101816	1000	*	197	NA	1704	1704	3.24663
chr11	11724181	11725180	1000	*	1603	NA	1705	1705	3.24641
chr12	100856063	100857062	1000	*	970	NA	1706	1706	3.24625
chr8	120725253	120726252	1000	*	8312	NA	1707	1707	3.2461
chr3	14893553	14894552	1000	*	12378	NA	1708	1708	3.2453
chr10	93169610	93170609	1000	*	3987	NA	1709	1709	3.24493
chr16	78537118	78538117	1000	*	28680	NA	1710	1710	3.24488
chr6	54840318	54841317	1000	*	8272	NA	1711	1711	3.24447
chr12	3282275	3283274	1000	*	4788	NA	1712	1712	3.24401
chr16	43620061	43621060	1000	*	1507	NA	1713	1713	3.24393
chr4	32136894	32137893	1000	*	405	NA	1714	1714	3.24384
chr9	21372198	21373197	1000	*	3774	NA	1715	1715	3.24359
chr12	101008897	101009896	1000	*	845	NA	1716	1716	3.24297
chr4	119896901	119897900	1000	*	1315	NA	1717	1717	3.2428
chr10	61260991	61261990	1000	*	11123	NA	1718	1718	3.24279
chr15	27596541	27597540	1000	*	29530	NA	1719	1719	3.2427
chr14	55945965	55946964	1000	*	8433	NA	1720	1720	3.24265
chr4	59255653	59256652	1000	*	944	NA	1721	1721	3.24262
chr3	21984860	21985859	1000	*	390	NA	1722	1722	3.24262
chr2	60903210	60904209	1000	*	3177	NA	1723	1723	3.24206
chr1	54910271	54911270	1000	*	421	NA	1724	1724	3.24205
chr9	124108891	124109890	1000	*	6345	NA	1725	1725	3.24146
chr6	99248087	99249086	1000	*	1548	NA	1726	1726	3.24139
chr2	29637129	29638128	1000	*	1015	NA	1727	1727	3.24138
chr9	45251784	45252783	1000	*	4355	NA	1728	1728	3.24119
chr16	75894249	75895248	1000	*	4841	NA	1729	1729	3.24118
chr11	16978851	16979850	1000	*	1191	NA	1730	1730	3.24092
chr7	80917646	80918645	1000	*	1274	NA	1731	1731	3.24085
chr3	27330534	27331533	1000	*	2332	NA	1732	1732	3.2408
chr7	75796134	75797133	1000	*	9356	NA	1733	1733	3.24017
chr2	166471113	166472112	1000	*	9959	NA	1734	1734	3.24012
chr7	78724255	78725254	1000	*	3254	NA	1735	1735	3.24007
chr14	70281428	70282427	1000	*	11033	NA	1736	1736	3.23994
chr10	96597584	96598583	1000	*	1080	NA	1737	1737	3.23968
chr5	73287252	73288251	1000	*	2972	NA	1738	1738	3.23964
chr10	59974144	59975143	1000	*	6594	NA	1739	1739	3.23929
chr1	53791316	53792315	1000	*	11627	NA	1740	1740	3.23827
chr6	54957646	54958645	1000	*	1704	NA	1741	1741	3.2382
chr3	87844676	87845675	1000	*	338	NA	1742	1742	3.23798
chr8	35991880	35992879	1000	*	2854	NA	1743	1743	3.23794
chr1	161674324	161675323	1000	*	743	NA	1744	1744	3.23763
chr2	129185761	129186760	1000	*	10365	NA	1745	1745	3.23653
chr6	120082498	120083497	1000	*	29332	NA	1746	1746	3.2362
chr9	42097132	42098131	1000	*	28331	NA	1747	1747	3.23561
chr5	135540645	135541644	1000	*	638	NA	1748	1748	3.23424
chr2	155554266	155555265	1000	*	1596	NA	1749	1749	3.23414
chr13	85503049	85504048	1000	*	1825	NA	1750	1750	3.23408
chr6	129997177	129998176	1000	*	2429	NA	1751	1751	3.234
chr10	93326407	93327406	1000	*	2361	NA	1752	1752	3.23372
chrX	75034940	75035939	1000	*	974	NA	1753	1753	3.23272
chr3	109454192	109455191	1000	*	2156	NA	1754	1754	3.23223
chr2	9866871	9867870	1000	*	16942	NA	1755	1755	3.23178
chr15	97420006	97421005	1000	*	952	NA	1756	1756	3.2315
chr16	44337213	44338212	1000	*	1724	NA	1757	1757	3.2314
chr18	39020463	39021462	1000	*	7752	NA	1758	1758	3.23136
chr9	111146978	111147977	1000	*	442	NA	1759	1759	3.23053
chr13	113089125	113090124	1000	*	3683	NA	1760	1760	3.23051
chr9	42075958	42076957	1000	*	938	NA	1761	1761	3.2302
chr2	68881698	68882697	1000	*	2911	NA	1762	1762	3.22995
chr1	191391007	191392006	1000	*	127	NA	1763	1763	3.22944
chr11	46392575	46393574	1000	*	5058	NA	1764	1764	3.2293
chr10	68221892	68222891	1000	*	1467	NA	1765	1765	3.22911
chr11	11705502	11706501	1000	*	767	NA	1766	1766	3.22901
chr2	27486958	27487957	1000	*	1858	NA	1767	1767	3.22889
chr7	66303455	66304454	1000	*	322	NA	1768	1768	3.22864
chr16	92867020	92868019	1000	*	4821	NA	1769	1769	3.22835
chr13	16340402	16341401	1000	*	3374	NA	1770	1770	3.22832
chr7	120705508	120706507	1000	*	1824	NA	1771	1771	3.22807
chr15	86056121	86057120	1000	*	1474	NA	1772	1772	3.22776
chr1	194996921	194997920	1000	*	5420	NA	1773	1773	3.22749
chr9	65404304	65405303	1000	*	36169	NA	1774	1774	3.2272
chr15	12211155	12212154	1000	*	1574	NA	1775	1775	3.2265
chr7	90145993	90146992	1000	*	24636	NA	1776	1776	3.22646
chr13	32904078	32905077	1000	*	1490	NA	1777	1777	3.226
chr4	134116611	134117610	1000	*	2322	NA	1778	1778	3.22574
chr15	62807065	62808064	1000	*	237	NA	1779	1779	3.22568
chrX	107250330	107251329	1000	*	364	NA	1780	1780	3.22541
chr2	128381495	128382494	1000	*	9722	NA	1781	1781	3.22525
chr4	133674642	133675641	1000	*	12338	NA	1782	1782	3.22498
chr15	74923224	74924223	1000	*	3272	NA	1783	1783	3.22483
chr13	5665922	5666921	1000	*	2482	NA	1784	1784	3.22449
chr8	111593652	111594651	1000	*	800	NA	1785	1785	3.22443
chr1	171618650	171619649	1000	*	8648	NA	1786	1786	3.2244
chr10	77520190	77521189	1000	*	7151	NA	1787	1787	3.22436
chr10	45020554	45021553	1000	*	762	NA	1788	1788	3.22426
chr1	182520553	182521552	1000	*	7478	NA	1789	1789	3.22384
chr14	61589145	61590144	1000	*	3338	NA	1790	1790	3.22371
chr2	178519764	178520763	1000	*	4362	NA	1791	1791	3.22361
chr2	91835360	91836359	1000	*	7681	NA	1792	1792	3.22292
chr9	35123832	35124831	1000	*	19785	NA	1793	1793	3.22239
chr12	102348162	102349161	1000	*	3122	NA	1794	1794	3.22201
chr17	28699468	28700467	1000	*	2095	NA	1795	1795	3.22159
chr17	31077268	31078267	1000	*	2737	NA	1796	1796	3.22147
chr1	40476501	40477500	1000	*	1710	NA	1797	1797	3.22125
chr6	90746485	90747484	1000	*	1529	NA	1798	1798	3.22094
chr5	124035556	124036555	1000	*	5241	NA	1799	1799	3.22079
chr12	25216482	25217481	1000	*	1220	NA	1800	1800	3.22032
chr10	95022215	95023214	1000	*	6869	NA	1801	1801	3.21948
chr6	86608120	86609119	1000	*	7678	NA	1802	1802	3.21936
chr17	63965578	63966577	1000	*	1642	NA	1803	1803	3.21894
chr19	46705555	46706554	1000	*	12059	NA	1804	1804	3.21866
chr5	107698630	107699629	1000	*	13891	NA	1805	1805	3.21814
chr2	52572554	52573553	1000	*	1935	NA	1806	1806	3.21798
chr10	39471231	39472230	1000	*	979	NA	1807	1807	3.2178
chr13	85458982	85459981	1000	*	3425	NA	1808	1808	3.21755
chr1	80765398	80766397	1000	*	13448	NA	1809	1809	3.21727
chr4	6475936	6476935	1000	*	4031	NA	1810	1810	3.21721
chr12	69422548	69423547	1000	*	27431	NA	1811	1811	3.21653
chr4	101250267	101251266	1000	*	9898	NA	1812	1812	3.21631
chr7	97068405	97069404	1000	*	2807	NA	1813	1813	3.21622
chr14	27354908	27355907	1000	*	24045	NA	1814	1814	3.21589
chrX	107325442	107326441	1000	*	30029	NA	1815	1815	3.21588
chr11	11568954	11569953	1000	*	368	NA	1816	1816	3.21536
chr10	85352268	85353267	1000	*	9480	NA	1817	1817	3.21508
chr3	101010346	101011345	1000	*	3289	NA	1818	1818	3.21482
chr14	78907969	78908968	1000	*	3333	NA	1819	1819	3.21461
chr10	68197833	68198832	1000	*	1581	NA	1820	1820	3.21431
chr7	67359453	67360452	1000	*	5308	NA	1821	1821	3.21429
chr18	65405362	65406361	1000	*	8628	NA	1822	1822	3.21398
chr10	39401524	39402523	1000	*	977	NA	1823	1823	3.21327
chr7	90351803	90352802	1000	*	4416	NA	1824	1824	3.21306
chr1	144283003	144284002	1000	*	192	NA	1825	1825	3.21304
chr1	164973577	164974576	1000	*	660	NA	1826	1826	3.2128
chr11	83632407	83633406	1000	*	6948	NA	1827	1827	3.21263
chr8	128650024	128651023	1000	*	14561	NA	1828	1828	3.21245
chr11	97821666	97822665	1000	*	19684	NA	1829	1829	3.21218
chr10	18006450	18007449	1000	*	963	NA	1830	1830	3.21214
chr1	80728661	80729660	1000	*	1774	NA	1831	1831	3.21183
chr3	87840538	87841537	1000	*	17033	NA	1832	1832	3.21172
chr4	98280165	98281164	1000	*	765	NA	1833	1833	3.21151
chr12	85970502	85971501	1000	*	1961	NA	1834	1834	3.21133
chr3	89190103	89191102	1000	*	14479	NA	1835	1835	3.21088
chr1	54888240	54889239	1000	*	6578	NA	1836	1836	3.21028
chr8	83750200	83751199	1000	*	1278	NA	1837	1837	3.21012
chr10	39458503	39459502	1000	*	1435	NA	1838	1838	3.20911
chr13	20801554	20802553	1000	*	5848	NA	1839	1839	3.20904
chr3	116630099	116631098	1000	*	2196	NA	1840	1840	3.20837
chr4	63846793	63847792	1000	*	9610	NA	1841	1841	3.20791
chr19	9107515	9108514	1000	*	519	NA	1842	1842	3.20755
chr2	3729071	3730070	1000	*	3109	NA	1843	1843	3.20753
chr9	116188548	116189547	1000	*	17642	NA	1844	1844	3.20749
chr1	106615451	106616450	1000	*	2514	NA	1845	1845	3.20737
chr3	60522052	60523051	1000	*	6039	NA	1846	1846	3.2068
chr4	150557678	150558677	1000	*	1199	NA	1847	1847	3.20606
chr17	83995740	83996739	1000	*	7539	NA	1848	1848	3.20577
chrX	75031538	75032537	1000	*	6228	NA	1849	1849	3.20565
chr9	115611688	115612687	1000	*	16022	NA	1850	1850	3.20557
chr16	92813206	92814205	1000	*	1345	NA	1851	1851	3.20542
chr2	34938384	34939383	1000	*	1645	NA	1852	1852	3.20527
chr7	66149172	66150171	1000	*	1725	NA	1853	1853	3.20467
chr7	101634166	101635165	1000	*	3691	NA	1854	1854	3.20446
chr10	75304252	75305251	1000	*	11829	NA	1855	1855	3.20446
chr7	16207018	16208017	1000	*	1193	NA	1856	1856	3.20404
chr1	52040173	52041172	1000	*	1904	NA	1857	1857	3.20391
chr13	98923667	98924666	1000	*	486	NA	1858	1858	3.20377
chr8	122917689	122918688	1000	*	5226	NA	1859	1859	3.20339
chr6	122269850	122270849	1000	*	16276	NA	1860	1860	3.20339
chr7	80783517	80784516	1000	*	921	NA	1861	1861	3.20334
chr2	166492586	166493585	1000	*	27	NA	1862	1862	3.20326
chr2	13410062	13411061	1000	*	4816	NA	1863	1863	3.20323
chr13	19193638	19194637	1000	*	2187	NA	1864	1864	3.2031
chr1	171122530	171123529	1000	*	4312	NA	1865	1865	3.20307
chr1	127627028	127628027	1000	*	2875	NA	1866	1866	3.20302
chr10	22295423	22296422	1000	*	4373	NA	1867	1867	3.20301
chr13	115097924	115098923	1000	*	3327	NA	1868	1868	3.20287
chr13	93762586	93763585	1000	*	2613	NA	1869	1869	3.20286
chr5	8675083	8676082	1000	*	20425	NA	1870	1870	3.20246
chr18	39048634	39049633	1000	*	7261	NA	1871	1871	3.20124
chr4	134047330	134048329	1000	*	1697	NA	1872	1872	3.2011
chr4	133057375	133058374	1000	*	6957	NA	1873	1873	3.20067
chr10	118082550	118083549	1000	*	3869	NA	1874	1874	3.20045
chr2	167351168	167352167	1000	*	12716	NA	1875	1875	3.1999
chr7	73596024	73597023	1000	*	8025	NA	1876	1876	3.19943
chr5	21043762	21044761	1000	*	2473	NA	1877	1877	3.19938
chr2	166620199	166621198	1000	*	884	NA	1878	1878	3.19931
chr6	119197780	119198779	1000	*	135	NA	1879	1879	3.19913
chr1	52654955	52655954	1000	*	9029	NA	1880	1880	3.19905
chr3	60573132	60574131	1000	*	333	NA	1881	1881	3.19864
chr14	75032487	75033486	1000	*	251	NA	1882	1882	3.19852
chr13	5779176	5780175	1000	*	3044	NA	1883	1883	3.19844
chr10	39402336	39403335	1000	*	678	NA	1884	1884	3.19778
chr11	103373008	103374007	1000	*	1146	NA	1885	1885	3.19699
chr11	11765014	11766013	1000	*	2763	NA	1886	1886	3.19663
chr10	68511953	68512952	1000	*	2974	NA	1887	1887	3.19605
chr10	117863952	117864951	1000	*	6711	NA	1888	1888	3.19603
chr1	36805395	36806394	1000	*	2448	NA	1889	1889	3.19593
chr15	59796199	59797198	1000	*	983	NA	1890	1890	3.19582
chr16	3981764	3982763	1000	*	2070	NA	1891	1891	3.19548
chr15	66860461	66861460	1000	*	1763	NA	1892	1892	3.19518
chr1	80374502	80375501	1000	*	1888	NA	1893	1893	3.19487
chr10	20857407	20858406	1000	*	1733	NA	1894	1894	3.19434
chr4	59333083	59334082	1000	*	1786	NA	1895	1895	3.19385
chr8	13689052	13690051	1000	*	4928	NA	1896	1896	3.19379
chr4	59334015	59335014	1000	*	3376	NA	1897	1897	3.19368
chr2	127323333	127324332	1000	*	1555	NA	1898	1898	3.19356
chr10	7950422	7951421	1000	*	4283	NA	1899	1899	3.19332
chr4	46524696	46525695	1000	*	172	NA	1900	1900	3.19304
chr15	60123750	60124749	1000	*	9672	NA	1901	1901	3.1929
chr10	8132337	8133336	1000	*	380	NA	1902	1902	3.19259
chr10	82888298	82889297	1000	*	505	NA	1903	1903	3.19197
chr11	98479248	98480247	1000	*	11232	NA	1904	1904	3.19191
chr6	129743794	129744793	1000	*	14294	NA	1905	1905	3.19143
chr18	79071695	79072694	1000	*	896	NA	1906	1906	3.19105
chr10	41972547	41973546	1000	*	5059	NA	1907	1907	3.19058
chr9	14280474	14281473	1000	*	4217	NA	1908	1908	3.19051
chr1	88652341	88653340	1000	*	559	NA	1909	1909	3.1904
chr13	83000799	83001798	1000	*	4192	NA	1910	1910	3.19003
chr1	165985474	165986473	1000	*	347	NA	1911	1911	3.18946
chr1	165722204	165723203	1000	*	4597	NA	1912	1912	3.18915
chr10	18007900	18008899	1000	*	4001	NA	1913	1913	3.18904
chr6	130341911	130342910	1000	*	15369	NA	1914	1914	3.189
chr18	4279586	4280585	1000	*	5115	NA	1915	1915	3.18895
chr2	3738050	3739049	1000	*	293	NA	1916	1916	3.18893
chr5	31443640	31444639	1000	*	2318	NA	1917	1917	3.18872
chr1	80641286	80642285	1000	*	4697	NA	1918	1918	3.18819
chr14	64731822	64732821	1000	*	19102	NA	1919	1919	3.18809
chr9	64831453	64832452	1000	*	3679	NA	1920	1920	3.18737
chr1	43241002	43242001	1000	*	2065	NA	1921	1921	3.18686
chr9	64789704	64790703	1000	*	3574	NA	1922	1922	3.18659
chr5	31766597	31767596	1000	*	4449	NA	1923	1923	3.18646
chr1	138189872	138190871	1000	*	3392	NA	1924	1924	3.18602
chr9	66276651	66277650	1000	*	4839	NA	1925	1925	3.18436
chr2	30689932	30690931	1000	*	1317	NA	1926	1926	3.184
chr4	133844784	133845783	1000	*	2015	NA	1927	1927	3.18379
chr1	165982689	165983688	1000	*	1450	NA	1928	1928	3.18368
chr1	138251734	138252733	1000	*	1712	NA	1929	1929	3.18343
chr12	25958369	25959368	1000	*	9753	NA	1930	1930	3.1832
chr6	54809491	54810490	1000	*	8050	NA	1931	1931	3.18298
chr7	128050632	128051631	1000	*	11478	NA	1932	1932	3.18288
chr12	25359581	25360580	1000	*	2434	NA	1933	1933	3.18246
chr1	43536710	43537709	1000	*	2147	NA	1934	1934	3.18242
chr4	7340920	7341919	1000	*	18450	NA	1935	1935	3.18202
chr14	75186007	75187006	1000	*	8865	NA	1936	1936	3.18184
chr19	21863192	21864191	1000	*	793	NA	1937	1937	3.18176
chr19	5815649	5816648	1000	*	1136	NA	1938	1938	3.18172
chr6	140231653	140232652	1000	*	1089	NA	1939	1939	3.18169
chr6	128792728	128793727	1000	*	123	NA	1940	1940	3.18167
chr1	138258593	138259592	1000	*	408	NA	1941	1941	3.18142
chr15	36615716	36616715	1000	*	924	NA	1942	1942	3.18094
chr2	18176673	18177672	1000	*	4071	NA	1943	1943	3.18049
chr16	75905011	75906010	1000	*	4475	NA	1944	1944	3.17984
chr9	85125545	85126544	1000	*	501	NA	1945	1945	3.17926
chr2	68875378	68876377	1000	*	7260	NA	1946	1946	3.17855
chr5	64864717	64865716	1000	*	21597	NA	1947	1947	3.17837
chr1	138248447	138249446	1000	*	5662	NA	1948	1948	3.17824
chr1	144272719	144273718	1000	*	629	NA	1949	1949	3.17742
chr2	52573306	52574305	1000	*	1852	NA	1950	1950	3.17691
chr19	37108105	37109104	1000	*	2270	NA	1951	1951	3.17658
chr5	38884781	38885780	1000	*	3481	NA	1952	1952	3.17556
chr13	85501619	85502618	1000	*	1170	NA	1953	1953	3.17535
chr11	46343775	46344774	1000	*	4152	NA	1954	1954	3.1753
chr16	92883605	92884604	1000	*	3846	NA	1955	1955	3.17513
chr17	36023323	36024322	1000	*	2284	NA	1956	1956	3.1751
chr6	103473276	103474275	1000	*	1887	NA	1957	1957	3.175
chr11	106540207	106541206	1000	*	169	NA	1958	1958	3.17478
chr5	62790867	62791866	1000	*	6822	NA	1959	1959	3.17476
chr11	97819610	97820609	1000	*	2749	NA	1960	1960	3.17464
chr3	136610249	136611248	1000	*	310	NA	1961	1961	3.17445
chr5	124075520	124076519	1000	*	1896	NA	1962	1962	3.17424
chr1	134058529	134059528	1000	*	2225	NA	1963	1963	3.17421
chr16	91412985	91413984	1000	*	3471	NA	1964	1964	3.17418
chr17	84141456	84142455	1000	*	1466	NA	1965	1965	3.17417
chr12	8659529	8660528	1000	*	18807	NA	1966	1966	3.17391
chr1	127348450	127349449	1000	*	2632	NA	1967	1967	3.17286
chr13	43243859	43244858	1000	*	1057	NA	1968	1968	3.17282
chr3	79248121	79249120	1000	*	19935	NA	1969	1969	3.17277
chr2	11360687	11361686	1000	*	733	NA	1970	1970	3.1724
chr10	96786927	96787926	1000	*	15358	NA	1971	1971	3.17221
chr7	120698945	120699944	1000	*	31200	NA	1972	1972	3.17198
chr15	76316757	76317756	1000	*	13262	NA	1973	1973	3.17197
chr2	126474833	126475832	1000	*	5217	NA	1974	1974	3.17135
chr10	44400293	44401292	1000	*	3255	NA	1975	1975	3.17122
chr3	148729387	148730386	1000	*	4904	NA	1976	1976	3.17054
chr11	117994083	117995082	1000	*	2459	NA	1977	1977	3.17023
chr7	58455066	58456065	1000	*	574	NA	1978	1978	3.17014
chr17	6768064	6769063	1000	*	3179	NA	1979	1979	3.17012
chr18	79303106	79304105	1000	*	2745	NA	1980	1980	3.17007
chr7	30890317	30891316	1000	*	1492	NA	1981	1981	3.16989
chr5	23721536	23722535	1000	*	13971	NA	1982	1982	3.1697
chr12	77534117	77535116	1000	*	1850	NA	1983	1983	3.16966
chr17	17607472	17608471	1000	*	2086	NA	1984	1984	3.16938
chr12	92740726	92741725	1000	*	1120	NA	1985	1985	3.16927
chr6	128604179	128605178	1000	*	13903	NA	1986	1986	3.16908
chr14	70797191	70798190	1000	*	20475	NA	1987	1987	3.16905
chr5	100582755	100583754	1000	*	2424	NA	1988	1988	3.16892
chr9	22645918	22646917	1000	*	8307	NA	1989	1989	3.16878
chr11	63974856	63975855	1000	*	4240	NA	1990	1990	3.16831
chr12	80794647	80795646	1000	*	2227	NA	1991	1991	3.16791
chrX	153887894	153888893	1000	*	2534	NA	1992	1992	3.16752
chr11	106662846	106663845	1000	*	4677	NA	1993	1993	3.1673
chr8	69188843	69189842	1000	*	2590	NA	1994	1994	3.16727
chr3	52567237	52568236	1000	*	2543	NA	1995	1995	3.16702
chr10	12806589	12807588	1000	*	604	NA	1996	1996	3.16684
chr3	105768155	105769154	1000	*	14475	NA	1997	1997	3.16676
chr17	32053421	32054420	1000	*	8009	NA	1998	1998	3.16638
chr11	67494768	67495767	1000	*	6143	NA	1999	1999	3.16637
[truncated: 49,651 more rows]

## Sheet: NKC promoters and enhancers
chromosome	start	stop	enhancer/promoter name
chr6	130386715	130387301	Klra1Hss1
chr6	130382399	130382698	Klra1Pro2
chr6	130342139	130342401	Klra3Hss1
chr6	130337448	130337698	Klra3Pro2
chr6	130031509	130032047	Klra6Hss1
chr6	130026889	130026967	Klra6Pro2
chr6	130237356	130238561	Klra7Hss1
chr6	130235434	130236260	Klra7Hss5
chr6	130231519	130231881	Klra7Pro3
chr6	130197591	130197893	Klra9Hss1
chr6	130192989	130193186	Klra9Pro2
chr6	129679687	129681188	Klrc15E
chr6	129678697	129679008	Klrc1Pro
chr6	129627474	129627847	Klrk15E
chr6	129622505	129622739	Klrk1ProDN
