# Supplementary material for: Binary outcomes of enhancer activity underlie stable random monoallelic expression
Source: eLife. 2022 May 26;11:e74204. doi: 10.7554/eLife.74204 (PMC9135403; doi:10.7554/eLife.74204)
Supplement: Source data 3. — The raw data provided correspond to all graphed data points in both the main and supplementary figures. Each tab corresponds to one or multiple panels within a figure. In cases where the data displayed in a graph are combined from two independent experiments, data points from each experiment are indicated. The results from statistical tests performed are also displayed. [file elife-74204-data3.xlsx]

## Sheet: Fig. 1-- supplement 2 D and G 
2D	NKG2A		2G	Ly49G2
no zap	flanking guides		no zap	flanking guides
9.78	44.7		1.91	15.5
8.74	28.8		3.82	23.3
9.03	23.3		2.08	16.5
Ratio paired t test			Ratio paired t test
P value	0.0179		P value	0.0021
P value summary	*		P value summary	**
Significantly different (P < 0.05)?	Yes		Significantly different (P < 0.05)?	Yes
One- or two-tailed P value?	Two-tailed		One- or two-tailed P value?	Two-tailed
t, df	t=7.366, df=2		t, df	t=21.73, df=2
Number of pairs	3		Number of pairs	3

## Sheet: Fig. 3 C and F
3C	Ly49A	Genotypes refere to Klra1-Hss1						3F	NKG2A	Genotypes refer to Klrc1-5'E
WT	WT/Δ	Δ/Δ	Experiment 1					WT	WT/Δ	Δ/Δ	Experiment 1
15.7	12.2	0.027						47	40.9	0.03
14.2	7.72	0.32						44.9	33.3	0.066
14.7	9.16	0.12						45.5	31.9	0.21
13.2	11.1							49.8	35.7
18.1	12.3								45.1
	11.1								35.8
									34.5
15.1	7.42	0.045	Experiment 2						46.8
15	6.73	0.048
15.5	9.74							50.8	29.9	0.36	Experiment 2
11.5	6.72							41.2	30.4	0.35
11.1	7.51								30.4	0.13
16	9.58								17.7	0.21
									37.5
									35.7
									35.6
									35.8
									33.9
									40.7
Tukey's multiple comparisons test	Mean Diff.	95.00% CI of diff.	Significant?	Summary	Adjusted P Value			Tukey's multiple comparisons test	Mean Diff.	95.00% CI of diff.	Significant?	Summary	Adjusted P Value
WT vs. WT/Δ	5.281	3.338 to 7.225	Yes	****	<0.0001	A-B		+/+ vs. +/Δ	11.44	5.367 to 17.52	Yes	***	0.0002	A-B
WT vs. Δ/Δ	14.44	11.93 to 16.95	Yes	****	<0.0001	A-C		+/+ vs. Δ/Δ	46.34	39.17 to 53.51	Yes	****	<0.0001	A-C
WT/Δ vs. Δ/Δ	9.161	6.683 to 11.64	Yes	****	<0.0001	B-C		+/Δ vs. Δ/Δ	34.9	29.15 to 40.64	Yes	****	<0.0001	B-C

## Sheet: Fig. 3-- supplement 1B
	All genotypes refer to Klra1-Hss1
	Klra1/Ly49A				Klra6/Ly49F				Klra7/Ly49G				Klra9/Ly49I
	WT	WT/Δ	Δ/Δ		WT	WT/Δ	Δ/Δ		WT	WT/Δ	Δ/Δ		WT	WT/Δ	Δ/Δ
Experment 1	15.7	12.2	0.027		5.18	7.77	7.35		46.1	50.7	51.9		49.2	50.6	50.3
	14.2	7.72	0.32		6.42	5.58	7.82		46.6	46.4	50.4		51.4	50.4	51.9
	14.7	9.16	0.12		6.8	5.82	6.15		49.2	49.2	50.5		47.4	51.6	51
	13.2	11.1			6.12	7.04			48.2	49.3			52.7	50.1
	18.1	12.3			5.72	7.03			49	50.5			50.8	49.7
		11.1				6.7				49.9				52.5
Experiment 2	15.1	7.42	0.045		6.13	7.04	6.11		49.5	49.3	51		55.9	50.9	50.8
	15	6.73	0.048		4.99	5.74	6.85		49.4	49.7	52.5		52.7	52.5	50.8
	15.5	9.74			5.7	6.09			45.8	50.2			53.6	52.4
	11.5	6.72			4.25	6.13			44.6	50.7			53.7	50
	11.1	7.51			5.54	5.66			46	47.6			51.4	48.7
	16	9.58			6.04	5.82			49.9	49.5			54.5	52.9

## Sheet: Fig. 3--supplement 1D
	All genotypes refer to Klrc1-5'E
	All values represent % NK cells NKG2A+
	B3Δ	B1Δ	B3Δ	B1Δ	B3Δ	B1Δ
	WT/WT	WT/WT	WT/Δ	WT/Δ	Δ/Δ	Δ/Δ
Experiment 1 (B3Δ)	47	48.8	40.9	38.7	0.03	0.061
	44.9	52.8	33.3	41.2	0.066	0.17
	45.5	48.7	31.9	37.9	0.21	0.1
	49.8	55	35.7	44.8		0.037
			45.1	36.3		0.16
			35.8	36.5		0.17
			34.5
			46.8
Experiment 2 (B3Δ)	50.8		29.9		0.36
	41.2		30.4		0.35
			30.4		0.13
			17.7		0.21
			37.5
			35.7
			35.6
			35.8
			33.9
			40.7
Two experiments were performed withB3Δ-Experiment 1 in red Experiment 2 in blue
One experiment was performed with B1Δ in green

## Sheet: Fig. 3--supplement 2C
	Values represent % NK cells positive for the indicated NKG2A allele in (B6 x BALB/c)F1 mice
	Expected (EXP) refers to the expected proportion of NK cells positive for the indicated allele in Nkg2a(B6-5’EΔ/BALB/c-5’E+) mice based on the WT values
	Observed (OBS) values are the experimentall observed proportion of NK cells positive for the indicated allele in Nkg2a(B6-5’EΔ/BALB/c-5’E+) mice
	% neither allele				% BALB allele only				% B6 allele only				% both alleles
	WT	EXP	OBS		WT	EXP	OBS		WT	EXP	OBS		WT	EXP	OBS
	53	66.9	60.8		11.4	26	36		13.9	0	0.062		14.6	0	0.031
	46.2	59.5	70.4		15.2	32.3	27.1		13.3	0	0.055		17.1	0	0.027
	53.4	64.7	62.5		11.3	25.9	34.7		11.3	0	0.051		14.6	0	0
	52	62.3	63.5		12.5	27.2	34.1		10.3	0	0.038		14.7	0	0
			63.1				33.6				0.038				0.038
			64.4				32.3				0.035				0.071
			64.6				33.3				0				0.046

## Sheet: Fig. 3--supplement 2F 
	Values represent % NK cells positive for the indicated Ly49A allele(s) in (B6 x BALB/c)F1 mice
	All genotypes refer to Ly49a-Hss1
	% NK cells expressing both alleles of Ly49A			% NK cells expressing only the BALB allele of Ly49A
	B6+/BALB+	B6(Hss1Δ)/BALB+		B6+/BALB+	B6(Hss1Δ)/BALB+
	5.21	0		3.61	4.47	Experiment 1
	4.47	0		4.12	3.25
	4.98	0.035		4.07	5.22
	5.62	0		3.87	5.75
		0.11			6.1
	5.25	0.031		3.38	6.66	Experiment 2
	4.87	0.051		3.26	5.8
	5.04	0.12		4.46	5.25
	5.14			4.76

## Sheet: Fig. 4 C 
	All genotypes refer toKlra7-Hss1
	% NK cells Ly49G2+
	WT	WT/Δ	Δ/Δ
	51.2	39.4	34.3
	50.2	45.4	30.3
	48.8	44.5	33
	51.6	47.4	33.4
		43.4
		45.2
		46.8
		43.1
		43.6
		43.1
		43.5
	Tukey's multiple comparisons test	Mean Diff.	95.00% CI of diff.	Significant?	Summary	Adjusted P Value
	WT/WT vs. WT/Del	6.323	3.406 to 9.240	Yes	***	0.0001	A-B
	WT/WT vs. Del/Del	17.7	14.17 to 21.23	Yes	****	<0.0001	A-C
	WT/Del vs. Del/Del	11.38	8.460 to 14.29	Yes	****	<0.0001	B-C

## Sheet: Fig. 4D
	All genotypes refer to Klra7-Hss1
	Ly49G2 mean fluorescence intensity
	WT/WT	WT/Del	Del/Del
	3574	3629	3226
	3849	3701	3228
	3632	3578	3270
	3808	3545	2949
		3316
		3461
		3370
		3455
		3287
		3415
		3486
	Tukey's multiple comparisons test	Mean Diff.	95.00% CI of diff.	Significant?	Summary	Adjusted P Value
	WT/WT vs. WT/Del	239.1	38.06 to 440.2	Yes	*	0.019	A-B
	WT/WT vs. Del/Del	547.5	304.0 to 791.0	Yes	****	<0.0001	A-C
	WT/Del vs. Del/Del	308.4	107.3 to 509.4	Yes	**	0.0031	B-C

## Sheet: Fig. 4F
	Values represent % NK cells positive for the indicated Ly49G2 allele in (B6 x BALB/c)F1 mice
	Expected (EXP) refers to the expected proportion of NK cells positive for the indicated allele in Klra7(B6-Hss1Δ/BALB/c-Hss1+) mice based on the WT values
	Observed (OBS) values are the experimentall observed proportion of NK cells positive for the indicated allele in Ly49g(B6-Hss1Δ/BALB/c-Hss1+) mice
	% neither allele				% BALB allele only				% B6 allele only				% both alleles
	WT	EXP	OBS		WT	EXP	OBS		WT	EXP	OBS		WT	EXP	OBS
	67.9	77.4	79.2		7.82	9.35	10.1		18.1	8.6	6.33		2.93	1.4	1.05
	66.9	76.4	74.5		8.79	10.07	11.8		18.2	8.7	7.04		2.45	1.17	1.38
	71.8	79.2	76.2		7.88	8.85	10		14.3	6.8	7.14		1.85	0.88	0.76
	69	77.1	75.6		8.62	9.84	10.1		15.5	7.4	6.86		2.34	1.12	0.76
	68.4	76.5			9	10.15			15.4	7.3			2.19	1.04

## Sheet: Fig. 4-- supplement 1B
All values represent the proportion of NK cells Ly49G2+
All genotypes refer to Klra7-Hss5
B2Δ	B1Δ	B2Δ	B1Δ	B2Δ	B1Δ
WT/WT	WT/WT	WT/Δ	WT/Δ	Δ/Δ	Δ/Δ
51.2	56.7	39.4	44.5	34.3	32.9
50.2	52.4	45.4	48.8	30.3	30.2
48.8		44.5	45.8	33	34.9
51.6		47.4	45.6	33.4	32.4
		43.4	43.6
		45.2	42.3
		46.8	46.1
		43.1	48.5
		43.6	47.7
		43.1	50.1
		43.5	49.1
One experiment performed with B2Δ in red								One experiment performed with B1Δ in blue
Tukey's multiple comparisons test	Mean Diff.	95.00% CI of diff.	Significant?	Summary	Adjusted P Value			Tukey's multiple comparisons test	Mean Diff.	95.00% CI of diff.	Significant?	Summary	Adjusted P Value
WT/WT vs. WT/Del	6.323	3.406 to 9.240	Yes	***	0.0001	A-C		WT/WT vs. WT/Del	7.995	3.116 to 12.88	Yes	**	0.002	B-D
WT/WT vs. Del/Del	17.7	14.17 to 21.23	Yes	****	<0.0001	A-E		WT/WT vs. Del/Del	21.95	16.45 to 27.45	Yes	****	<0.0001	B-F
WT/Del vs. Del/Del	11.38	8.460 to 14.29	Yes	****	<0.0001	C-E		WT/Del vs. Del/Del	13.95	10.25 to 17.66	Yes	****	<0.0001	D-F

[truncated: 5 more sheets: Fig. 5, Fig. 5-- supplement 1 B and C, Fig. 7B, Fig. 7-- supplement 1, Fig. 7-- supplement 2H]
