# Supplementary material for: Binary outcomes of enhancer activity underlie stable random monoallelic expression
Source: eLife. 2022 May 26;11:e74204. doi: 10.7554/eLife.74204 (PMC9135403; doi:10.7554/eLife.74204)
Supplement: Source data 4. — .xlsx file containing ChromHMM-derived 3 state model for cells expressing neither (Ly49G2 DN) or both (Ly49G2 DP) NK cells. Models were built using CUT&RUN data as is described in the methods. [file elife-74204-data4.xlsx]

## Sheet: Ly49G2 DN NK cells 3 states
track name="DN_NK_3" description="DN_NK_3 (Emission ordered)" visibility=1 itemRgb="On"
chr10	0	3193400	2	0	.	0	3193400	255,255,51
chr10	3193400	3195000	3	0	.	3193400	3195000	255,0,0
chr10	3195000	3276800	2	0	.	3195000	3276800	255,255,51
chr10	3276800	3288400	3	0	.	3276800	3288400	255,0,0
chr10	3288400	3327000	2	0	.	3288400	3327000	255,255,51
chr10	3327000	3328600	3	0	.	3327000	3328600	255,0,0
chr10	3328600	3364000	2	0	.	3328600	3364000	255,255,51
chr10	3364000	3366200	3	0	.	3364000	3366200	255,0,0
chr10	3366200	3367600	1	0	.	3366200	3367600	0,153,0
chr10	3367600	3369000	3	0	.	3367600	3369000	255,0,0
chr10	3369000	3509600	2	0	.	3369000	3509600	255,255,51
chr10	3509600	3512400	1	0	.	3509600	3512400	0,153,0
chr10	3512400	3537000	2	0	.	3512400	3537000	255,255,51
chr10	3537000	3539400	3	0	.	3537000	3539400	255,0,0
chr10	3539400	3738400	2	0	.	3539400	3738400	255,255,51
chr10	3738400	3741600	3	0	.	3738400	3741600	255,0,0
chr10	3741600	3972600	2	0	.	3741600	3972600	255,255,51
chr10	3972600	3975000	1	0	.	3972600	3975000	0,153,0
chr10	3975000	4068000	2	0	.	3975000	4068000	255,255,51
chr10	4068000	4068800	1	0	.	4068000	4068800	0,153,0
chr10	4068800	4079200	2	0	.	4068800	4079200	255,255,51
chr10	4079200	4080400	1	0	.	4079200	4080400	0,153,0
chr10	4080400	4265600	2	0	.	4080400	4265600	255,255,51
chr10	4265600	4269000	3	0	.	4265600	4269000	255,0,0
chr10	4269000	4333600	2	0	.	4269000	4333600	255,255,51
chr10	4333600	4334800	1	0	.	4333600	4334800	0,153,0
chr10	4334800	4355800	2	0	.	4334800	4355800	255,255,51
chr10	4355800	4356200	1	0	.	4355800	4356200	0,153,0
chr10	4356200	4384800	2	0	.	4356200	4384800	255,255,51
chr10	4384800	4392400	1	0	.	4384800	4392400	0,153,0
chr10	4392400	4431000	2	0	.	4392400	4431000	255,255,51
chr10	4431000	4434000	1	0	.	4431000	4434000	0,153,0
chr10	4434000	4611400	2	0	.	4434000	4611400	255,255,51
chr10	4611400	4613400	1	0	.	4611400	4613400	0,153,0
chr10	4613400	4631600	2	0	.	4613400	4631600	255,255,51
chr10	4631600	4633200	1	0	.	4631600	4633200	0,153,0
chr10	4633200	4708800	2	0	.	4633200	4708800	255,255,51
chr10	4708800	4713800	3	0	.	4708800	4713800	255,0,0
chr10	4713800	4976800	2	0	.	4713800	4976800	255,255,51
chr10	4976800	4978000	1	0	.	4976800	4978000	0,153,0
chr10	4978000	4979000	2	0	.	4978000	4979000	255,255,51
chr10	4979000	4979600	3	0	.	4979000	4979600	255,0,0
chr10	4979600	5163600	2	0	.	4979600	5163600	255,255,51
chr10	5163600	5164600	1	0	.	5163600	5164600	0,153,0
chr10	5164600	5193000	2	0	.	5164600	5193000	255,255,51
chr10	5193000	5195400	1	0	.	5193000	5195400	0,153,0
chr10	5195400	5592000	2	0	.	5195400	5592000	255,255,51
chr10	5592000	5602800	3	0	.	5592000	5602800	255,0,0
chr10	5602800	5604200	1	0	.	5602800	5604200	0,153,0
chr10	5604200	5621800	3	0	.	5604200	5621800	255,0,0
chr10	5621800	5636000	2	0	.	5621800	5636000	255,255,51
chr10	5636000	5638200	3	0	.	5636000	5638200	255,0,0
chr10	5638200	5642000	2	0	.	5638200	5642000	255,255,51
chr10	5642000	5643600	3	0	.	5642000	5643600	255,0,0
chr10	5643600	5774400	2	0	.	5643600	5774400	255,255,51
chr10	5774400	5778400	3	0	.	5774400	5778400	255,0,0
chr10	5778400	5784600	2	0	.	5778400	5784600	255,255,51
chr10	5784600	5789800	3	0	.	5784600	5789800	255,0,0
chr10	5789800	5800400	2	0	.	5789800	5800400	255,255,51
chr10	5800400	5807800	1	0	.	5800400	5807800	0,153,0
chr10	5807800	5822200	2	0	.	5807800	5822200	255,255,51
chr10	5822200	5825200	1	0	.	5822200	5825200	0,153,0
chr10	5825200	5829000	2	0	.	5825200	5829000	255,255,51
chr10	5829000	5832800	3	0	.	5829000	5832800	255,0,0
chr10	5832800	5857200	2	0	.	5832800	5857200	255,255,51
chr10	5857200	5858400	3	0	.	5857200	5858400	255,0,0
chr10	5858400	5858600	1	0	.	5858400	5858600	0,153,0
chr10	5858600	5920600	2	0	.	5858600	5920600	255,255,51
chr10	5920600	5924400	3	0	.	5920600	5924400	255,0,0
chr10	5924400	6885400	2	0	.	5924400	6885400	255,255,51
chr10	6885400	6886600	1	0	.	6885400	6886600	0,153,0
chr10	6886600	6928400	2	0	.	6886600	6928400	255,255,51
chr10	6928400	6929800	1	0	.	6928400	6929800	0,153,0
chr10	6929800	6954400	2	0	.	6929800	6954400	255,255,51
chr10	6954400	6959400	1	0	.	6954400	6959400	0,153,0
chr10	6959400	6968600	2	0	.	6959400	6968600	255,255,51
chr10	6968600	6985200	1	0	.	6968600	6985200	0,153,0
chr10	6985200	6986600	2	0	.	6985200	6986600	255,255,51
chr10	6986600	6990000	1	0	.	6986600	6990000	0,153,0
chr10	6990000	6996800	2	0	.	6990000	6996800	255,255,51
chr10	6996800	6998000	1	0	.	6996800	6998000	0,153,0
chr10	6998000	7009600	2	0	.	6998000	7009600	255,255,51
chr10	7009600	7011600	1	0	.	7009600	7011600	0,153,0
chr10	7011600	7062400	2	0	.	7011600	7062400	255,255,51
chr10	7062400	7063600	1	0	.	7062400	7063600	0,153,0
chr10	7063600	7178800	2	0	.	7063600	7178800	255,255,51
chr10	7178800	7179200	1	0	.	7178800	7179200	0,153,0
chr10	7179200	7210400	2	0	.	7179200	7210400	255,255,51
chr10	7210400	7213200	1	0	.	7210400	7213200	0,153,0
chr10	7213200	7213800	2	0	.	7213200	7213800	255,255,51
chr10	7213800	7214000	1	0	.	7213800	7214000	0,153,0
chr10	7214000	7282400	2	0	.	7214000	7282400	255,255,51
chr10	7282400	7284200	3	0	.	7282400	7284200	255,0,0
chr10	7284200	7385400	2	0	.	7284200	7385400	255,255,51
chr10	7385400	7390400	3	0	.	7385400	7390400	255,0,0
chr10	7390400	7392800	1	0	.	7390400	7392800	0,153,0
chr10	7392800	7395800	3	0	.	7392800	7395800	255,0,0
chr10	7395800	7440200	2	0	.	7395800	7440200	255,255,51
chr10	7440200	7441200	1	0	.	7440200	7441200	0,153,0
chr10	7441200	7469200	2	0	.	7441200	7469200	255,255,51
chr10	7469200	7474600	1	0	.	7469200	7474600	0,153,0
chr10	7474600	7483200	2	0	.	7474600	7483200	255,255,51
chr10	7483200	7485000	1	0	.	7483200	7485000	0,153,0
chr10	7485000	7491800	2	0	.	7485000	7491800	255,255,51
chr10	7491800	7492600	1	0	.	7491800	7492600	0,153,0
chr10	7492600	7496200	2	0	.	7492600	7496200	255,255,51
chr10	7496200	7500000	3	0	.	7496200	7500000	255,0,0
chr10	7500000	7589200	2	0	.	7500000	7589200	255,255,51
chr10	7589200	7591000	1	0	.	7589200	7591000	0,153,0
chr10	7591000	7592000	3	0	.	7591000	7592000	255,0,0
chr10	7592000	7595800	2	0	.	7592000	7595800	255,255,51
chr10	7595800	7596200	1	0	.	7595800	7596200	0,153,0
chr10	7596200	7600600	2	0	.	7596200	7600600	255,255,51
chr10	7600600	7601000	1	0	.	7600600	7601000	0,153,0
chr10	7601000	7621600	2	0	.	7601000	7621600	255,255,51
chr10	7621600	7622400	1	0	.	7621600	7622400	0,153,0
chr10	7622400	7661000	2	0	.	7622400	7661000	255,255,51
chr10	7661000	7664800	1	0	.	7661000	7664800	0,153,0
chr10	7664800	7667000	2	0	.	7664800	7667000	255,255,51
chr10	7667000	7668600	1	0	.	7667000	7668600	0,153,0
chr10	7668600	7679800	2	0	.	7668600	7679800	255,255,51
chr10	7679800	7683600	1	0	.	7679800	7683600	0,153,0
chr10	7683600	7725600	2	0	.	7683600	7725600	255,255,51
chr10	7725600	7728000	1	0	.	7725600	7728000	0,153,0
chr10	7728000	7779200	2	0	.	7728000	7779200	255,255,51
chr10	7779200	7781600	1	0	.	7779200	7781600	0,153,0
chr10	7781600	7791400	2	0	.	7781600	7791400	255,255,51
chr10	7791400	7794800	1	0	.	7791400	7794800	0,153,0
chr10	7794800	7816200	2	0	.	7794800	7816200	255,255,51
chr10	7816200	7817200	1	0	.	7816200	7817200	0,153,0
chr10	7817200	7832000	2	0	.	7817200	7832000	255,255,51
chr10	7832000	7833800	1	0	.	7832000	7833800	0,153,0
chr10	7833800	7907000	2	0	.	7833800	7907000	255,255,51
chr10	7907000	7908200	1	0	.	7907000	7908200	0,153,0
chr10	7908200	7928200	2	0	.	7908200	7928200	255,255,51
chr10	7928200	7932800	1	0	.	7928200	7932800	0,153,0
chr10	7932800	7933600	2	0	.	7932800	7933600	255,255,51
chr10	7933600	7938600	1	0	.	7933600	7938600	0,153,0
chr10	7938600	7941200	2	0	.	7938600	7941200	255,255,51
chr10	7941200	7959400	1	0	.	7941200	7959400	0,153,0
chr10	7959400	7976600	2	0	.	7959400	7976600	255,255,51
chr10	7976600	7977000	1	0	.	7976600	7977000	0,153,0
chr10	7977000	8007200	2	0	.	7977000	8007200	255,255,51
chr10	8007200	8007800	1	0	.	8007200	8007800	0,153,0
chr10	8007800	8037000	2	0	.	8007800	8037000	255,255,51
chr10	8037000	8038200	1	0	.	8037000	8038200	0,153,0
chr10	8038200	8055000	2	0	.	8038200	8055000	255,255,51
chr10	8055000	8057400	1	0	.	8055000	8057400	0,153,0
chr10	8057400	8065200	2	0	.	8057400	8065200	255,255,51
chr10	8065200	8067000	1	0	.	8065200	8067000	0,153,0
chr10	8067000	8069800	2	0	.	8067000	8069800	255,255,51
chr10	8069800	8071000	1	0	.	8069800	8071000	0,153,0
chr10	8071000	8114000	2	0	.	8071000	8114000	255,255,51
chr10	8114000	8115200	1	0	.	8114000	8115200	0,153,0
chr10	8115200	8121800	2	0	.	8115200	8121800	255,255,51
chr10	8121800	8122800	1	0	.	8121800	8122800	0,153,0
chr10	8122800	8127200	2	0	.	8122800	8127200	255,255,51
chr10	8127200	8134000	1	0	.	8127200	8134000	0,153,0
chr10	8134000	8175200	2	0	.	8134000	8175200	255,255,51
chr10	8175200	8178200	1	0	.	8175200	8178200	0,153,0
chr10	8178200	8181600	2	0	.	8178200	8181600	255,255,51
chr10	8181600	8182000	1	0	.	8181600	8182000	0,153,0
chr10	8182000	8184600	2	0	.	8182000	8184600	255,255,51
chr10	8184600	8185400	1	0	.	8184600	8185400	0,153,0
chr10	8185400	8194000	2	0	.	8185400	8194000	255,255,51
chr10	8194000	8198200	1	0	.	8194000	8198200	0,153,0
chr10	8198200	8203800	2	0	.	8198200	8203800	255,255,51
chr10	8203800	8205800	1	0	.	8203800	8205800	0,153,0
chr10	8205800	8213600	2	0	.	8205800	8213600	255,255,51
chr10	8213600	8214600	1	0	.	8213600	8214600	0,153,0
chr10	8214600	8240000	2	0	.	8214600	8240000	255,255,51
chr10	8240000	8241200	1	0	.	8240000	8241200	0,153,0
chr10	8241200	8370000	2	0	.	8241200	8370000	255,255,51
chr10	8370000	8370600	1	0	.	8370000	8370600	0,153,0
chr10	8370600	8415000	2	0	.	8370600	8415000	255,255,51
chr10	8415000	8416600	1	0	.	8415000	8416600	0,153,0
chr10	8416600	8465200	2	0	.	8416600	8465200	255,255,51
chr10	8465200	8466200	1	0	.	8465200	8466200	0,153,0
chr10	8466200	8505200	2	0	.	8466200	8505200	255,255,51
chr10	8505200	8506800	1	0	.	8505200	8506800	0,153,0
chr10	8506800	8516600	2	0	.	8506800	8516600	255,255,51
chr10	8516600	8519800	1	0	.	8516600	8519800	0,153,0
chr10	8519800	8531200	2	0	.	8519800	8531200	255,255,51
chr10	8531200	8532600	1	0	.	8531200	8532600	0,153,0
chr10	8532600	8735800	2	0	.	8532600	8735800	255,255,51
chr10	8735800	8736000	1	0	.	8735800	8736000	0,153,0
chr10	8736000	8745400	2	0	.	8736000	8745400	255,255,51
chr10	8745400	8748200	1	0	.	8745400	8748200	0,153,0
chr10	8748200	8758800	2	0	.	8748200	8758800	255,255,51
chr10	8758800	8760400	1	0	.	8758800	8760400	0,153,0
chr10	8760400	8765600	2	0	.	8760400	8765600	255,255,51
chr10	8765600	8766600	1	0	.	8765600	8766600	0,153,0
chr10	8766600	8786400	2	0	.	8766600	8786400	255,255,51
chr10	8786400	8787200	1	0	.	8786400	8787200	0,153,0
chr10	8787200	8882400	2	0	.	8787200	8882400	255,255,51
chr10	8882400	8891000	3	0	.	8882400	8891000	255,0,0
chr10	8891000	9669200	2	0	.	8891000	9669200	255,255,51
chr10	9669200	9681800	3	0	.	9669200	9681800	255,0,0
chr10	9681800	9802000	2	0	.	9681800	9802000	255,255,51
chr10	9802000	9803000	1	0	.	9802000	9803000	0,153,0
chr10	9803000	9868800	2	0	.	9803000	9868800	255,255,51
chr10	9868800	9872200	1	0	.	9868800	9872200	0,153,0
chr10	9872200	9879800	2	0	.	9872200	9879800	255,255,51
chr10	9879800	9882000	1	0	.	9879800	9882000	0,153,0
chr10	9882000	9895000	2	0	.	9882000	9895000	255,255,51
chr10	9895000	9902400	1	0	.	9895000	9902400	0,153,0
chr10	9902400	9907600	2	0	.	9902400	9907600	255,255,51
chr10	9907600	9908200	1	0	.	9907600	9908200	0,153,0
chr10	9908200	9954000	2	0	.	9908200	9954000	255,255,51
chr10	9954000	9954600	1	0	.	9954000	9954600	0,153,0
chr10	9954600	10049200	2	0	.	9954600	10049200	255,255,51
chr10	10049200	10050000	1	0	.	10049200	10050000	0,153,0
chr10	10050000	10069600	2	0	.	10050000	10069600	255,255,51
chr10	10069600	10071200	1	0	.	10069600	10071200	0,153,0
chr10	10071200	10093800	2	0	.	10071200	10093800	255,255,51
chr10	10093800	10097000	1	0	.	10093800	10097000	0,153,0
chr10	10097000	10181800	2	0	.	10097000	10181800	255,255,51
chr10	10181800	10188200	1	0	.	10181800	10188200	0,153,0
chr10	10188200	10211400	2	0	.	10188200	10211400	255,255,51
chr10	10211400	10212200	1	0	.	10211400	10212200	0,153,0
chr10	10212200	10224400	2	0	.	10212200	10224400	255,255,51
chr10	10224400	10225000	1	0	.	10224400	10225000	0,153,0
chr10	10225000	10265400	2	0	.	10225000	10265400	255,255,51
chr10	10265400	10266400	1	0	.	10265400	10266400	0,153,0
chr10	10266400	10395600	2	0	.	10266400	10395600	255,255,51
chr10	10395600	10396800	1	0	.	10395600	10396800	0,153,0
chr10	10396800	10405800	2	0	.	10396800	10405800	255,255,51
chr10	10405800	10407000	1	0	.	10405800	10407000	0,153,0
chr10	10407000	10557000	2	0	.	10407000	10557000	255,255,51
chr10	10557000	10558400	1	0	.	10557000	10558400	0,153,0
chr10	10558400	10558600	2	0	.	10558400	10558600	255,255,51
chr10	10558600	10561800	3	0	.	10558600	10561800	255,0,0
chr10	10561800	11079200	2	0	.	10561800	11079200	255,255,51
chr10	11079200	11081800	3	0	.	11079200	11081800	255,0,0
chr10	11081800	11148800	2	0	.	11081800	11148800	255,255,51
chr10	11148800	11151000	1	0	.	11148800	11151000	0,153,0
chr10	11151000	11280000	2	0	.	11151000	11280000	255,255,51
chr10	11280000	11283800	1	0	.	11280000	11283800	0,153,0
chr10	11283800	11292600	2	0	.	11283800	11292600	255,255,51
chr10	11292600	11293600	1	0	.	11292600	11293600	0,153,0
chr10	11293600	11303800	2	0	.	11293600	11303800	255,255,51
chr10	11303800	11307400	1	0	.	11303800	11307400	0,153,0
chr10	11307400	11342800	2	0	.	11307400	11342800	255,255,51
chr10	11342800	11344600	1	0	.	11342800	11344600	0,153,0
chr10	11344600	12729000	2	0	.	11344600	12729000	255,255,51
chr10	12729000	12729800	1	0	.	12729000	12729800	0,153,0
chr10	12729800	12739800	2	0	.	12729800	12739800	255,255,51
chr10	12739800	12742000	1	0	.	12739800	12742000	0,153,0
chr10	12742000	12805800	2	0	.	12742000	12805800	255,255,51
chr10	12805800	12807200	1	0	.	12805800	12807200	0,153,0
chr10	12807200	12811400	2	0	.	12807200	12811400	255,255,51
chr10	12811400	12814600	1	0	.	12811400	12814600	0,153,0
chr10	12814600	12820800	2	0	.	12814600	12820800	255,255,51
chr10	12820800	12821800	1	0	.	12820800	12821800	0,153,0
chr10	12821800	12823800	2	0	.	12821800	12823800	255,255,51
chr10	12823800	12824400	1	0	.	12823800	12824400	0,153,0
chr10	12824400	12841600	2	0	.	12824400	12841600	255,255,51
chr10	12841600	12843000	1	0	.	12841600	12843000	0,153,0
chr10	12843000	12850800	2	0	.	12843000	12850800	255,255,51
chr10	12850800	12851200	1	0	.	12850800	12851200	0,153,0
chr10	12851200	12866800	2	0	.	12851200	12866800	255,255,51
chr10	12866800	12870000	1	0	.	12866800	12870000	0,153,0
chr10	12870000	12874000	2	0	.	12870000	12874000	255,255,51
chr10	12874000	12875800	1	0	.	12874000	12875800	0,153,0
chr10	12875800	12919200	2	0	.	12875800	12919200	255,255,51
chr10	12919200	12919800	1	0	.	12919200	12919800	0,153,0
chr10	12919800	12921600	2	0	.	12919800	12921600	255,255,51
chr10	12921600	12923600	1	0	.	12921600	12923600	0,153,0
chr10	12923600	12962000	2	0	.	12923600	12962000	255,255,51
chr10	12962000	12965200	1	0	.	12962000	12965200	0,153,0
chr10	12965200	12985000	2	0	.	12965200	12985000	255,255,51
chr10	12985000	12985400	1	0	.	12985000	12985400	0,153,0
chr10	12985400	12993400	2	0	.	12985400	12993400	255,255,51
chr10	12993400	12993800	1	0	.	12993400	12993800	0,153,0
chr10	12993800	12997000	2	0	.	12993800	12997000	255,255,51
chr10	12997000	12997400	1	0	.	12997000	12997400	0,153,0
chr10	12997400	13007800	2	0	.	12997400	13007800	255,255,51
chr10	13007800	13009600	1	0	.	13007800	13009600	0,153,0
chr10	13009600	13016600	2	0	.	13009600	13016600	255,255,51
chr10	13016600	13017000	1	0	.	13016600	13017000	0,153,0
chr10	13017000	13019400	2	0	.	13017000	13019400	255,255,51
chr10	13019400	13049200	3	0	.	13019400	13049200	255,0,0
chr10	13049200	13061800	2	0	.	13049200	13061800	255,255,51
chr10	13061800	13068200	3	0	.	13061800	13068200	255,0,0
chr10	13068200	13075000	2	0	.	13068200	13075000	255,255,51
chr10	13075000	13075200	3	0	.	13075000	13075200	255,0,0
chr10	13075200	13083600	2	0	.	13075200	13083600	255,255,51
chr10	13083600	13090600	3	0	.	13083600	13090600	255,0,0
chr10	13090600	13091200	1	0	.	13090600	13091200	0,153,0
chr10	13091200	13099800	3	0	.	13091200	13099800	255,0,0
chr10	13099800	13192200	2	0	.	13099800	13192200	255,255,51
chr10	13192200	13193400	1	0	.	13192200	13193400	0,153,0
chr10	13193400	13301800	2	0	.	13193400	13301800	255,255,51
chr10	13301800	13302200	1	0	.	13301800	13302200	0,153,0
chr10	13302200	13322400	2	0	.	13302200	13322400	255,255,51
chr10	13322400	13323200	3	0	.	13322400	13323200	255,0,0
chr10	13323200	13324000	1	0	.	13323200	13324000	0,153,0
chr10	13324000	13328600	3	0	.	13324000	13328600	255,0,0
chr10	13328600	13444200	2	0	.	13328600	13444200	255,255,51
chr10	13444200	13445400	1	0	.	13444200	13445400	0,153,0
chr10	13445400	13446600	2	0	.	13445400	13446600	255,255,51
chr10	13446600	13447200	1	0	.	13446600	13447200	0,153,0
chr10	13447200	13453400	2	0	.	13447200	13453400	255,255,51
chr10	13453400	13453800	1	0	.	13453400	13453800	0,153,0
chr10	13453800	13473400	2	0	.	13453800	13473400	255,255,51
chr10	13473400	13475400	1	0	.	13473400	13475400	0,153,0
chr10	13475400	13497400	2	0	.	13475400	13497400	255,255,51
chr10	13497400	13502200	1	0	.	13497400	13502200	0,153,0
chr10	13502200	13502800	2	0	.	13502200	13502800	255,255,51
chr10	13502800	13503000	1	0	.	13502800	13503000	0,153,0
chr10	13503000	13552200	2	0	.	13503000	13552200	255,255,51
chr10	13552200	13554200	1	0	.	13552200	13554200	0,153,0
chr10	13554200	13584600	2	0	.	13554200	13584600	255,255,51
chr10	13584600	13586200	3	0	.	13584600	13586200	255,0,0
chr10	13586200	13868400	2	0	.	13586200	13868400	255,255,51
chr10	13868400	13869600	1	0	.	13868400	13869600	0,153,0
chr10	13869600	13963600	2	0	.	13869600	13963600	255,255,51
chr10	13963600	13971400	1	0	.	13963600	13971400	0,153,0
chr10	13971400	13981400	2	0	.	13971400	13981400	255,255,51
chr10	13981400	13984800	1	0	.	13981400	13984800	0,153,0
chr10	13984800	14014000	2	0	.	13984800	14014000	255,255,51
chr10	14014000	14018000	1	0	.	14014000	14018000	0,153,0
chr10	14018000	14019000	2	0	.	14018000	14019000	255,255,51
chr10	14019000	14019400	1	0	.	14019000	14019400	0,153,0
chr10	14019400	14027000	2	0	.	14019400	14027000	255,255,51
chr10	14027000	14028000	1	0	.	14027000	14028000	0,153,0
chr10	14028000	14033800	2	0	.	14028000	14033800	255,255,51
chr10	14033800	14035000	1	0	.	14033800	14035000	0,153,0
chr10	14035000	14044800	2	0	.	14035000	14044800	255,255,51
chr10	14044800	14047400	1	0	.	14044800	14047400	0,153,0
chr10	14047400	14055000	2	0	.	14047400	14055000	255,255,51
chr10	14055000	14060400	1	0	.	14055000	14060400	0,153,0
chr10	14060400	14084000	2	0	.	14060400	14084000	255,255,51
chr10	14084000	14089000	1	0	.	14084000	14089000	0,153,0
chr10	14089000	14207600	2	0	.	14089000	14207600	255,255,51
chr10	14207600	14208000	1	0	.	14207600	14208000	0,153,0
chr10	14208000	14542600	2	0	.	14208000	14542600	255,255,51
chr10	14542600	14548600	3	0	.	14542600	14548600	255,0,0
chr10	14548600	14703200	2	0	.	14548600	14703200	255,255,51
chr10	14703200	14706200	1	0	.	14703200	14706200	0,153,0
chr10	14706200	14712800	2	0	.	14706200	14712800	255,255,51
chr10	14712800	14714400	3	0	.	14712800	14714400	255,0,0
chr10	14714400	14749600	2	0	.	14714400	14749600	255,255,51
chr10	14749600	14752400	3	0	.	14749600	14752400	255,0,0
chr10	14752400	14759200	2	0	.	14752400	14759200	255,255,51
chr10	14759200	14761000	3	0	.	14759200	14761000	255,0,0
chr10	14761000	16661400	2	0	.	14761000	16661400	255,255,51
chr10	16661400	16661600	1	0	.	16661400	16661600	0,153,0
chr10	16661600	16742000	2	0	.	16661600	16742000	255,255,51
chr10	16742000	16742800	1	0	.	16742000	16742800	0,153,0
chr10	16742800	16751200	2	0	.	16742800	16751200	255,255,51
chr10	16751200	16752000	1	0	.	16751200	16752000	0,153,0
chr10	16752000	17347000	2	0	.	16752000	17347000	255,255,51
chr10	17347000	17348400	1	0	.	17347000	17348400	0,153,0
chr10	17348400	17484000	2	0	.	17348400	17484000	255,255,51
chr10	17484000	17486200	1	0	.	17484000	17486200	0,153,0
chr10	17486200	17512000	2	0	.	17486200	17512000	255,255,51
chr10	17512000	17514200	1	0	.	17512000	17514200	0,153,0
chr10	17514200	17541000	2	0	.	17514200	17541000	255,255,51
chr10	17541000	17542000	1	0	.	17541000	17542000	0,153,0
chr10	17542000	17549600	2	0	.	17542000	17549600	255,255,51
chr10	17549600	17550600	1	0	.	17549600	17550600	0,153,0
chr10	17550600	17562800	2	0	.	17550600	17562800	255,255,51
chr10	17562800	17563600	1	0	.	17562800	17563600	0,153,0
chr10	17563600	17564400	2	0	.	17563600	17564400	255,255,51
chr10	17564400	17566600	1	0	.	17564400	17566600	0,153,0
chr10	17566600	17575000	2	0	.	17566600	17575000	255,255,51
chr10	17575000	17577000	1	0	.	17575000	17577000	0,153,0
chr10	17577000	17584800	2	0	.	17577000	17584800	255,255,51
chr10	17584800	17586200	1	0	.	17584800	17586200	0,153,0
chr10	17586200	17683200	2	0	.	17586200	17683200	255,255,51
chr10	17683200	17684200	1	0	.	17683200	17684200	0,153,0
chr10	17684200	17721200	2	0	.	17684200	17721200	255,255,51
chr10	17721200	17726000	1	0	.	17721200	17726000	0,153,0
chr10	17726000	17727600	2	0	.	17726000	17727600	255,255,51
chr10	17727600	17729000	1	0	.	17727600	17729000	0,153,0
chr10	17729000	17772000	2	0	.	17729000	17772000	255,255,51
chr10	17772000	17773000	1	0	.	17772000	17773000	0,153,0
chr10	17773000	17774800	2	0	.	17773000	17774800	255,255,51
chr10	17774800	17775800	1	0	.	17774800	17775800	0,153,0
chr10	17775800	17795800	2	0	.	17775800	17795800	255,255,51
chr10	17795800	17797000	1	0	.	17795800	17797000	0,153,0
chr10	17797000	17861000	2	0	.	17797000	17861000	255,255,51
chr10	17861000	17862200	1	0	.	17861000	17862200	0,153,0
chr10	17862200	17920000	2	0	.	17862200	17920000	255,255,51
chr10	17920000	17921400	1	0	.	17920000	17921400	0,153,0
chr10	17921400	17944400	2	0	.	17921400	17944400	255,255,51
chr10	17944400	17948400	1	0	.	17944400	17948400	0,153,0
chr10	17948400	17987600	2	0	.	17948400	17987600	255,255,51
chr10	17987600	17990200	1	0	.	17987600	17990200	0,153,0
chr10	17990200	18005800	2	0	.	17990200	18005800	255,255,51
chr10	18005800	18010600	1	0	.	18005800	18010600	0,153,0
chr10	18010600	18020800	2	0	.	18010600	18020800	255,255,51
chr10	18020800	18023800	1	0	.	18020800	18023800	0,153,0
chr10	18023800	18055000	2	0	.	18023800	18055000	255,255,51
chr10	18055000	18058600	1	0	.	18055000	18058600	0,153,0
chr10	18058600	18061400	2	0	.	18058600	18061400	255,255,51
chr10	18061400	18061800	1	0	.	18061400	18061800	0,153,0
chr10	18061800	18064200	2	0	.	18061800	18064200	255,255,51
chr10	18064200	18065400	1	0	.	18064200	18065400	0,153,0
chr10	18065400	18070600	2	0	.	18065400	18070600	255,255,51
chr10	18070600	18072200	1	0	.	18070600	18072200	0,153,0
chr10	18072200	18091000	2	0	.	18072200	18091000	255,255,51
chr10	18091000	18092000	1	0	.	18091000	18092000	0,153,0
chr10	18092000	18176400	2	0	.	18092000	18176400	255,255,51
chr10	18176400	18177200	1	0	.	18176400	18177200	0,153,0
chr10	18177200	18196800	2	0	.	18177200	18196800	255,255,51
chr10	18196800	18197600	1	0	.	18196800	18197600	0,153,0
chr10	18197600	18234000	2	0	.	18197600	18234000	255,255,51
chr10	18234000	18236000	1	0	.	18234000	18236000	0,153,0
chr10	18236000	18315000	2	0	.	18236000	18315000	255,255,51
chr10	18315000	18318800	3	0	.	18315000	18318800	255,0,0
chr10	18318800	18319400	1	0	.	18318800	18319400	0,153,0
chr10	18319400	18323200	3	0	.	18319400	18323200	255,0,0
chr10	18323200	18338400	2	0	.	18323200	18338400	255,255,51
chr10	18338400	18346800	3	0	.	18338400	18346800	255,0,0
chr10	18346800	18406000	2	0	.	18346800	18406000	255,255,51
chr10	18406000	18407400	3	0	.	18406000	18407400	255,0,0
chr10	18407400	18408000	1	0	.	18407400	18408000	0,153,0
chr10	18408000	18423600	2	0	.	18408000	18423600	255,255,51
chr10	18423600	18424200	1	0	.	18423600	18424200	0,153,0
chr10	18424200	18430000	2	0	.	18424200	18430000	255,255,51
chr10	18430000	18432200	1	0	.	18430000	18432200	0,153,0
chr10	18432200	18469600	2	0	.	18432200	18469600	255,255,51
chr10	18469600	18470000	1	0	.	18469600	18470000	0,153,0
chr10	18470000	18491800	2	0	.	18470000	18491800	255,255,51
chr10	18491800	18492600	1	0	.	18491800	18492600	0,153,0
chr10	18492600	18527200	2	0	.	18492600	18527200	255,255,51
chr10	18527200	18529200	1	0	.	18527200	18529200	0,153,0
chr10	18529200	18530400	2	0	.	18529200	18530400	255,255,51
chr10	18530400	18533200	1	0	.	18530400	18533200	0,153,0
chr10	18533200	18543800	2	0	.	18533200	18543800	255,255,51
chr10	18543800	18546200	1	0	.	18543800	18546200	0,153,0
chr10	18546200	18554400	3	0	.	18546200	18554400	255,0,0
chr10	18554400	18577400	2	0	.	18554400	18577400	255,255,51
chr10	18577400	18579000	3	0	.	18577400	18579000	255,0,0
chr10	18579000	18592600	2	0	.	18579000	18592600	255,255,51
chr10	18592600	18593000	1	0	.	18592600	18593000	0,153,0
chr10	18593000	18606400	2	0	.	18593000	18606400	255,255,51
chr10	18606400	18609800	1	0	.	18606400	18609800	0,153,0
chr10	18609800	18612000	2	0	.	18609800	18612000	255,255,51
chr10	18612000	18613200	1	0	.	18612000	18613200	0,153,0
chr10	18613200	18689400	2	0	.	18613200	18689400	255,255,51
chr10	18689400	18691800	3	0	.	18689400	18691800	255,0,0
chr10	18691800	18743000	2	0	.	18691800	18743000	255,255,51
chr10	18743000	18744000	1	0	.	18743000	18744000	0,153,0
chr10	18744000	18771400	2	0	.	18744000	18771400	255,255,51
chr10	18771400	18772000	3	0	.	18771400	18772000	255,0,0
chr10	18772000	18789000	2	0	.	18772000	18789000	255,255,51
chr10	18789000	18812400	3	0	.	18789000	18812400	255,0,0
chr10	18812400	18817000	2	0	.	18812400	18817000	255,255,51
chr10	18817000	18818800	3	0	.	18817000	18818800	255,0,0
chr10	18818800	18833000	2	0	.	18818800	18833000	255,255,51
chr10	18833000	18834400	3	0	.	18833000	18834400	255,0,0
chr10	18834400	18838400	2	0	.	18834400	18838400	255,255,51
chr10	18838400	18887800	3	0	.	18838400	18887800	255,0,0
chr10	18887800	18895000	2	0	.	18887800	18895000	255,255,51
chr10	18895000	18904400	3	0	.	18895000	18904400	255,0,0
chr10	18904400	18904600	1	0	.	18904400	18904600	0,153,0
chr10	18904600	18916600	2	0	.	18904600	18916600	255,255,51
chr10	18916600	18919200	1	0	.	18916600	18919200	0,153,0
chr10	18919200	18922400	2	0	.	18919200	18922400	255,255,51
chr10	18922400	18925200	1	0	.	18922400	18925200	0,153,0
chr10	18925200	18936000	2	0	.	18925200	18936000	255,255,51
chr10	18936000	18936800	1	0	.	18936000	18936800	0,153,0
chr10	18936800	18941000	2	0	.	18936800	18941000	255,255,51
chr10	18941000	18941600	1	0	.	18941000	18941600	0,153,0
chr10	18941600	18946800	2	0	.	18941600	18946800	255,255,51
chr10	18946800	18949600	1	0	.	18946800	18949600	0,153,0
chr10	18949600	18953400	2	0	.	18949600	18953400	255,255,51
chr10	18953400	18954000	1	0	.	18953400	18954000	0,153,0
chr10	18954000	18963600	2	0	.	18954000	18963600	255,255,51
chr10	18963600	18965800	1	0	.	18963600	18965800	0,153,0
chr10	18965800	18970400	2	0	.	18965800	18970400	255,255,51
chr10	18970400	18971400	1	0	.	18970400	18971400	0,153,0
chr10	18971400	19009200	2	0	.	18971400	19009200	255,255,51
chr10	19009200	19016400	1	0	.	19009200	19016400	0,153,0
chr10	19016400	19043000	2	0	.	19016400	19043000	255,255,51
chr10	19043000	19044400	1	0	.	19043000	19044400	0,153,0
chr10	19044400	19045800	2	0	.	19044400	19045800	255,255,51
chr10	19045800	19047200	1	0	.	19045800	19047200	0,153,0
chr10	19047200	19060200	2	0	.	19047200	19060200	255,255,51
chr10	19060200	19069000	1	0	.	19060200	19069000	0,153,0
chr10	19069000	19091800	2	0	.	19069000	19091800	255,255,51
chr10	19091800	19092400	1	0	.	19091800	19092400	0,153,0
chr10	19092400	19094000	2	0	.	19092400	19094000	255,255,51
chr10	19094000	19095000	1	0	.	19094000	19095000	0,153,0
chr10	19095000	19099600	2	0	.	19095000	19099600	255,255,51
chr10	19099600	19100800	1	0	.	19099600	19100800	0,153,0
chr10	19100800	19102600	2	0	.	19100800	19102600	255,255,51
chr10	19102600	19107200	1	0	.	19102600	19107200	0,153,0
chr10	19107200	19118600	2	0	.	19107200	19118600	255,255,51
chr10	19118600	19119400	1	0	.	19118600	19119400	0,153,0
chr10	19119400	19124400	2	0	.	19119400	19124400	255,255,51
chr10	19124400	19126000	1	0	.	19124400	19126000	0,153,0
chr10	19126000	19167600	2	0	.	19126000	19167600	255,255,51
chr10	19167600	19173800	1	0	.	19167600	19173800	0,153,0
chr10	19173800	19184400	2	0	.	19173800	19184400	255,255,51
chr10	19184400	19189000	1	0	.	19184400	19189000	0,153,0
chr10	19189000	19209000	2	0	.	19189000	19209000	255,255,51
chr10	19209000	19210400	1	0	.	19209000	19210400	0,153,0
chr10	19210400	19214800	2	0	.	19210400	19214800	255,255,51
chr10	19214800	19216600	1	0	.	19214800	19216600	0,153,0
chr10	19216600	19240000	2	0	.	19216600	19240000	255,255,51
chr10	19240000	19240400	1	0	.	19240000	19240400	0,153,0
chr10	19240400	19341800	2	0	.	19240400	19341800	255,255,51
chr10	19341800	19367000	3	0	.	19341800	19367000	255,0,0
chr10	19367000	19391800	2	0	.	19367000	19391800	255,255,51
chr10	19391800	19392200	1	0	.	19391800	19392200	0,153,0
chr10	19392200	19396600	2	0	.	19392200	19396600	255,255,51
chr10	19396600	19410400	3	0	.	19396600	19410400	255,0,0
chr10	19410400	19461800	2	0	.	19410400	19461800	255,255,51
chr10	19461800	19464800	3	0	.	19461800	19464800	255,0,0
chr10	19464800	19491400	2	0	.	19464800	19491400	255,255,51
chr10	19491400	19499800	1	0	.	19491400	19499800	0,153,0
chr10	19499800	19502000	2	0	.	19499800	19502000	255,255,51
chr10	19502000	19507400	1	0	.	19502000	19507400	0,153,0
chr10	19507400	19515800	2	0	.	19507400	19515800	255,255,51
chr10	19515800	19522800	1	0	.	19515800	19522800	0,153,0
chr10	19522800	19529600	2	0	.	19522800	19529600	255,255,51
chr10	19529600	19531000	1	0	.	19529600	19531000	0,153,0
chr10	19531000	19570000	2	0	.	19531000	19570000	255,255,51
chr10	19570000	19571600	1	0	.	19570000	19571600	0,153,0
chr10	19571600	19576200	2	0	.	19571600	19576200	255,255,51
chr10	19576200	19580400	1	0	.	19576200	19580400	0,153,0
chr10	19580400	19581800	2	0	.	19580400	19581800	255,255,51
chr10	19581800	19584600	1	0	.	19581800	19584600	0,153,0
chr10	19584600	19590800	2	0	.	19584600	19590800	255,255,51
chr10	19590800	19597400	1	0	.	19590800	19597400	0,153,0
chr10	19597400	19599800	2	0	.	19597400	19599800	255,255,51
chr10	19599800	19601000	1	0	.	19599800	19601000	0,153,0
chr10	19601000	19612600	2	0	.	19601000	19612600	255,255,51
chr10	19612600	19613800	1	0	.	19612600	19613800	0,153,0
chr10	19613800	19691600	2	0	.	19613800	19691600	255,255,51
chr10	19691600	19693400	1	0	.	19691600	19693400	0,153,0
chr10	19693400	19712400	2	0	.	19693400	19712400	255,255,51
chr10	19712400	19713000	1	0	.	19712400	19713000	0,153,0
chr10	19713000	19716600	2	0	.	19713000	19716600	255,255,51
chr10	19716600	19717600	1	0	.	19716600	19717600	0,153,0
chr10	19717600	19718400	2	0	.	19717600	19718400	255,255,51
chr10	19718400	19719400	1	0	.	19718400	19719400	0,153,0
chr10	19719400	19827600	2	0	.	19719400	19827600	255,255,51
chr10	19827600	19829600	3	0	.	19827600	19829600	255,0,0
chr10	19829600	19830600	2	0	.	19829600	19830600	255,255,51
chr10	19830600	19831600	1	0	.	19830600	19831600	0,153,0
chr10	19831600	19838800	2	0	.	19831600	19838800	255,255,51
chr10	19838800	19850000	3	0	.	19838800	19850000	255,0,0
chr10	19850000	19852000	1	0	.	19850000	19852000	0,153,0
chr10	19852000	19854400	3	0	.	19852000	19854400	255,0,0
chr10	19854400	19906400	2	0	.	19854400	19906400	255,255,51
chr10	19906400	19908200	1	0	.	19906400	19908200	0,153,0
chr10	19908200	19920600	2	0	.	19908200	19920600	255,255,51
chr10	19920600	19926000	3	0	.	19920600	19926000	255,0,0
chr10	19926000	19933200	2	0	.	19926000	19933200	255,255,51
chr10	19933200	19937200	1	0	.	19933200	19937200	0,153,0
chr10	19937200	19938400	2	0	.	19937200	19938400	255,255,51
chr10	19938400	19941400	1	0	.	19938400	19941400	0,153,0
chr10	19941400	19991600	2	0	.	19941400	19991600	255,255,51
chr10	19991600	19992200	1	0	.	19991600	19992200	0,153,0
chr10	19992200	20005000	2	0	.	19992200	20005000	255,255,51
chr10	20005000	20006000	1	0	.	20005000	20006000	0,153,0
chr10	20006000	20036200	2	0	.	20006000	20036200	255,255,51
chr10	20036200	20037800	1	0	.	20036200	20037800	0,153,0
chr10	20037800	20040200	2	0	.	20037800	20040200	255,255,51
chr10	20040200	20041200	1	0	.	20040200	20041200	0,153,0
chr10	20041200	20103800	2	0	.	20041200	20103800	255,255,51
chr10	20103800	20105200	1	0	.	20103800	20105200	0,153,0
chr10	20105200	20119400	2	0	.	20105200	20119400	255,255,51
chr10	20119400	20119800	1	0	.	20119400	20119800	0,153,0
chr10	20119800	20123400	2	0	.	20119800	20123400	255,255,51
chr10	20123400	20123800	1	0	.	20123400	20123800	0,153,0
chr10	20123800	20145600	2	0	.	20123800	20145600	255,255,51
chr10	20145600	20148200	3	0	.	20145600	20148200	255,0,0
chr10	20148200	20150400	1	0	.	20148200	20150400	0,153,0
chr10	20150400	20154000	3	0	.	20150400	20154000	255,0,0
chr10	20154000	20219200	2	0	.	20154000	20219200	255,255,51
chr10	20219200	20220600	1	0	.	20219200	20220600	0,153,0
chr10	20220600	20233400	2	0	.	20220600	20233400	255,255,51
chr10	20233400	20234200	1	0	.	20233400	20234200	0,153,0
chr10	20234200	20235600	2	0	.	20234200	20235600	255,255,51
chr10	20235600	20236200	1	0	.	20235600	20236200	0,153,0
chr10	20236200	20279800	2	0	.	20236200	20279800	255,255,51
chr10	20279800	20280000	1	0	.	20279800	20280000	0,153,0
chr10	20280000	20281200	2	0	.	20280000	20281200	255,255,51
chr10	20281200	20282600	1	0	.	20281200	20282600	0,153,0
chr10	20282600	20290400	2	0	.	20282600	20290400	255,255,51
chr10	20290400	20290800	1	0	.	20290400	20290800	0,153,0
chr10	20290800	20310800	2	0	.	20290800	20310800	255,255,51
chr10	20310800	20315600	1	0	.	20310800	20315600	0,153,0
chr10	20315600	20326800	2	0	.	20315600	20326800	255,255,51
chr10	20326800	20327000	1	0	.	20326800	20327000	0,153,0
chr10	20327000	20347000	2	0	.	20327000	20347000	255,255,51
chr10	20347000	20349400	1	0	.	20347000	20349400	0,153,0
chr10	20349400	20398200	2	0	.	20349400	20398200	255,255,51
chr10	20398200	20398800	1	0	.	20398200	20398800	0,153,0
chr10	20398800	20471800	2	0	.	20398800	20471800	255,255,51
chr10	20471800	20472400	1	0	.	20471800	20472400	0,153,0
chr10	20472400	20531600	2	0	.	20472400	20531600	255,255,51
chr10	20531600	20532600	1	0	.	20531600	20532600	0,153,0
chr10	20532600	20540400	2	0	.	20532600	20540400	255,255,51
chr10	20540400	20547400	3	0	.	20540400	20547400	255,0,0
chr10	20547400	20576600	2	0	.	20547400	20576600	255,255,51
chr10	20576600	20580000	3	0	.	20576600	20580000	255,0,0
chr10	20580000	20717400	2	0	.	20580000	20717400	255,255,51
chr10	20717400	20718400	1	0	.	20717400	20718400	0,153,0
chr10	20718400	20724400	2	0	.	20718400	20724400	255,255,51
chr10	20724400	20725200	1	0	.	20724400	20725200	0,153,0
chr10	20725200	20728000	3	0	.	20725200	20728000	255,0,0
chr10	20728000	20736800	2	0	.	20728000	20736800	255,255,51
chr10	20736800	20738200	1	0	.	20736800	20738200	0,153,0
chr10	20738200	20750600	2	0	.	20738200	20750600	255,255,51
chr10	20750600	20751000	1	0	.	20750600	20751000	0,153,0
chr10	20751000	20790800	2	0	.	20751000	20790800	255,255,51
chr10	20790800	20791400	1	0	.	20790800	20791400	0,153,0
chr10	20791400	20827800	2	0	.	20791400	20827800	255,255,51
chr10	20827800	20828800	1	0	.	20827800	20828800	0,153,0
chr10	20828800	20834400	2	0	.	20828800	20834400	255,255,51
chr10	20834400	20835600	1	0	.	20834400	20835600	0,153,0
chr10	20835600	20854600	2	0	.	20835600	20854600	255,255,51
chr10	20854600	20855800	1	0	.	20854600	20855800	0,153,0
chr10	20855800	20857400	2	0	.	20855800	20857400	255,255,51
chr10	20857400	20858200	1	0	.	20857400	20858200	0,153,0
chr10	20858200	20864200	2	0	.	20858200	20864200	255,255,51
chr10	20864200	20865600	1	0	.	20864200	20865600	0,153,0
chr10	20865600	20881600	2	0	.	20865600	20881600	255,255,51
chr10	20881600	20883400	1	0	.	20881600	20883400	0,153,0
chr10	20883400	20906200	2	0	.	20883400	20906200	255,255,51
chr10	20906200	20907600	1	0	.	20906200	20907600	0,153,0
chr10	20907600	20930000	2	0	.	20907600	20930000	255,255,51
chr10	20930000	20939400	3	0	.	20930000	20939400	255,0,0
chr10	20939400	20952000	2	0	.	20939400	20952000	255,255,51
chr10	20952000	20954600	1	0	.	20952000	20954600	0,153,0
chr10	20954600	21077000	2	0	.	20954600	21077000	255,255,51
chr10	21077000	21077800	1	0	.	21077000	21077800	0,153,0
chr10	21077800	21158000	2	0	.	21077800	21158000	255,255,51
chr10	21158000	21161800	1	0	.	21158000	21161800	0,153,0
chr10	21161800	21164000	3	0	.	21161800	21164000	255,0,0
chr10	21164000	21188000	2	0	.	21164000	21188000	255,255,51
chr10	21188000	21189400	1	0	.	21188000	21189400	0,153,0
chr10	21189400	21196400	2	0	.	21189400	21196400	255,255,51
chr10	21196400	21197000	1	0	.	21196400	21197000	0,153,0
chr10	21197000	21204200	2	0	.	21197000	21204200	255,255,51
chr10	21204200	21206000	1	0	.	21204200	21206000	0,153,0
chr10	21206000	21207400	2	0	.	21206000	21207400	255,255,51
chr10	21207400	21208000	1	0	.	21207400	21208000	0,153,0
chr10	21208000	21234800	2	0	.	21208000	21234800	255,255,51
chr10	21234800	21236400	1	0	.	21234800	21236400	0,153,0
chr10	21236400	21244800	2	0	.	21236400	21244800	255,255,51
chr10	21244800	21245800	1	0	.	21244800	21245800	0,153,0
chr10	21245800	21251800	2	0	.	21245800	21251800	255,255,51
chr10	21251800	21252600	1	0	.	21251800	21252600	0,153,0
chr10	21252600	21318800	2	0	.	21252600	21318800	255,255,51
chr10	21318800	21319400	1	0	.	21318800	21319400	0,153,0
chr10	21319400	21395200	2	0	.	21319400	21395200	255,255,51
chr10	21395200	21399000	3	0	.	21395200	21399000	255,0,0
chr10	21399000	21407600	2	0	.	21399000	21407600	255,255,51
chr10	21407600	21409400	3	0	.	21407600	21409400	255,0,0
chr10	21409400	21442800	2	0	.	21409400	21442800	255,255,51
chr10	21442800	21450800	3	0	.	21442800	21450800	255,0,0
chr10	21450800	21454800	2	0	.	21450800	21454800	255,255,51
chr10	21454800	21456200	3	0	.	21454800	21456200	255,0,0
chr10	21456200	21460600	2	0	.	21456200	21460600	255,255,51
chr10	21460600	21520400	3	0	.	21460600	21520400	255,0,0
chr10	21520400	21524200	2	0	.	21520400	21524200	255,255,51
chr10	21524200	21538000	3	0	.	21524200	21538000	255,0,0
chr10	21538000	21543000	2	0	.	21538000	21543000	255,255,51
chr10	21543000	21564000	3	0	.	21543000	21564000	255,0,0
chr10	21564000	21582000	2	0	.	21564000	21582000	255,255,51
chr10	21582000	21591200	3	0	.	21582000	21591200	255,0,0
chr10	21591200	21618600	2	0	.	21591200	21618600	255,255,51
chr10	21618600	21619400	1	0	.	21618600	21619400	0,153,0
chr10	21619400	21681000	2	0	.	21619400	21681000	255,255,51
chr10	21681000	21687200	3	0	.	21681000	21687200	255,0,0
chr10	21687200	21700600	2	0	.	21687200	21700600	255,255,51
chr10	21700600	21701000	3	0	.	21700600	21701000	255,0,0
chr10	21701000	21744800	2	0	.	21701000	21744800	255,255,51
chr10	21744800	21747000	3	0	.	21744800	21747000	255,0,0
chr10	21747000	21805400	2	0	.	21747000	21805400	255,255,51
chr10	21805400	21808400	3	0	.	21805400	21808400	255,0,0
chr10	21808400	21834400	2	0	.	21808400	21834400	255,255,51
chr10	21834400	21845800	3	0	.	21834400	21845800	255,0,0
chr10	21845800	21873000	2	0	.	21845800	21873000	255,255,51
chr10	21873000	21874800	3	0	.	21873000	21874800	255,0,0
chr10	21874800	21880600	2	0	.	21874800	21880600	255,255,51
chr10	21880600	21892600	3	0	.	21880600	21892600	255,0,0
chr10	21892600	21902600	2	0	.	21892600	21902600	255,255,51
chr10	21902600	21903000	3	0	.	21902600	21903000	255,0,0
chr10	21903000	21905200	2	0	.	21903000	21905200	255,255,51
chr10	21905200	21905600	3	0	.	21905200	21905600	255,0,0
chr10	21905600	21906000	1	0	.	21905600	21906000	0,153,0
chr10	21906000	21906800	2	0	.	21906000	21906800	255,255,51
chr10	21906800	21909200	1	0	.	21906800	21909200	0,153,0
chr10	21909200	21927000	3	0	.	21909200	21927000	255,0,0
chr10	21927000	21936000	2	0	.	21927000	21936000	255,255,51
chr10	21936000	21945600	3	0	.	21936000	21945600	255,0,0
chr10	21945600	21949600	2	0	.	21945600	21949600	255,255,51
chr10	21949600	21975000	3	0	.	21949600	21975000	255,0,0
chr10	21975000	21977000	1	0	.	21975000	21977000	0,153,0
chr10	21977000	21982000	3	0	.	21977000	21982000	255,0,0
chr10	21982000	21982800	1	0	.	21982000	21982800	0,153,0
chr10	21982800	21991200	3	0	.	21982800	21991200	255,0,0
chr10	21991200	21995800	1	0	.	21991200	21995800	0,153,0
chr10	21995800	21996400	3	0	.	21995800	21996400	255,0,0
chr10	21996400	22001200	2	0	.	21996400	22001200	255,255,51
chr10	22001200	22012600	3	0	.	22001200	22012600	255,0,0
chr10	22012600	22019400	2	0	.	22012600	22019400	255,255,51
chr10	22019400	22021600	3	0	.	22019400	22021600	255,0,0
chr10	22021600	22024800	2	0	.	22021600	22024800	255,255,51
chr10	22024800	22030800	3	0	.	22024800	22030800	255,0,0
chr10	22030800	22080400	2	0	.	22030800	22080400	255,255,51
chr10	22080400	22083400	3	0	.	22080400	22083400	255,0,0
chr10	22083400	22106600	2	0	.	22083400	22106600	255,255,51
chr10	22106600	22108400	3	0	.	22106600	22108400	255,0,0
chr10	22108400	22119600	2	0	.	22108400	22119600	255,255,51
chr10	22119600	22125000	3	0	.	22119600	22125000	255,0,0
chr10	22125000	22164400	2	0	.	22125000	22164400	255,255,51
chr10	22164400	22186400	3	0	.	22164400	22186400	255,0,0
chr10	22186400	22290600	2	0	.	22186400	22290600	255,255,51
chr10	22290600	22295200	3	0	.	22290600	22295200	255,0,0
chr10	22295200	22296200	1	0	.	22295200	22296200	0,153,0
chr10	22296200	22297400	3	0	.	22296200	22297400	255,0,0
chr10	22297400	22303400	1	0	.	22297400	22303400	0,153,0
chr10	22303400	22305800	3	0	.	22303400	22305800	255,0,0
chr10	22305800	22308400	1	0	.	22305800	22308400	0,153,0
chr10	22308400	22322800	2	0	.	22308400	22322800	255,255,51
chr10	22322800	22324600	3	0	.	22322800	22324600	255,0,0
chr10	22324600	22330400	2	0	.	22324600	22330400	255,255,51
chr10	22330400	22344600	3	0	.	22330400	22344600	255,0,0
chr10	22344600	22345800	2	0	.	22344600	22345800	255,255,51
chr10	22345800	22353200	3	0	.	22345800	22353200	255,0,0
chr10	22353200	22358800	2	0	.	22353200	22358800	255,255,51
chr10	22358800	22360400	3	0	.	22358800	22360400	255,0,0
chr10	22360400	22363000	2	0	.	22360400	22363000	255,255,51
chr10	22363000	22366400	3	0	.	22363000	22366400	255,0,0
chr10	22366400	22473000	2	0	.	22366400	22473000	255,255,51
chr10	22473000	22479200	3	0	.	22473000	22479200	255,0,0
chr10	22479200	22578000	2	0	.	22479200	22578000	255,255,51
chr10	22578000	22579600	3	0	.	22578000	22579600	255,0,0
chr10	22579600	22630800	2	0	.	22579600	22630800	255,255,51
chr10	22630800	22631200	1	0	.	22630800	22631200	0,153,0
chr10	22631200	22636200	2	0	.	22631200	22636200	255,255,51
chr10	22636200	22645000	3	0	.	22636200	22645000	255,0,0
chr10	22645000	22645400	1	0	.	22645000	22645400	0,153,0
chr10	22645400	22718400	2	0	.	22645400	22718400	255,255,51
chr10	22718400	22719200	1	0	.	22718400	22719200	0,153,0
chr10	22719200	22729400	2	0	.	22719200	22729400	255,255,51
chr10	22729400	22732600	1	0	.	22729400	22732600	0,153,0
chr10	22732600	22809800	2	0	.	22732600	22809800	255,255,51
chr10	22809800	22831000	3	0	.	22809800	22831000	255,0,0
chr10	22831000	22833600	2	0	.	22831000	22833600	255,255,51
chr10	22833600	22848600	3	0	.	22833600	22848600	255,0,0
chr10	22848600	23076800	2	0	.	22848600	23076800	255,255,51
chr10	23076800	23077800	1	0	.	23076800	23077800	0,153,0
chr10	23077800	23785400	2	0	.	23077800	23785400	255,255,51
chr10	23785400	23789000	1	0	.	23785400	23789000	0,153,0
chr10	23789000	24111200	2	0	.	23789000	24111200	255,255,51
chr10	24111200	24114000	3	0	.	24111200	24114000	255,0,0
chr10	24114000	24120400	2	0	.	24114000	24120400	255,255,51
chr10	24120400	24123000	3	0	.	24120400	24123000	255,0,0
chr10	24123000	24131400	2	0	.	24123000	24131400	255,255,51
chr10	24131400	24132200	1	0	.	24131400	24132200	0,153,0
chr10	24132200	24139400	2	0	.	24132200	24139400	255,255,51
chr10	24139400	24142000	3	0	.	24139400	24142000	255,0,0
chr10	24142000	24149000	2	0	.	24142000	24149000	255,255,51
chr10	24149000	24152200	1	0	.	24149000	24152200	0,153,0
chr10	24152200	24214800	2	0	.	24152200	24214800	255,255,51
chr10	24214800	24227400	3	0	.	24214800	24227400	255,0,0
chr10	24227400	24265600	2	0	.	24227400	24265600	255,255,51
chr10	24265600	24268200	3	0	.	24265600	24268200	255,0,0
chr10	24268200	24278000	2	0	.	24268200	24278000	255,255,51
chr10	24278000	24291800	3	0	.	24278000	24291800	255,0,0
chr10	24291800	24293000	1	0	.	24291800	24293000	0,153,0
chr10	24293000	24306400	3	0	.	24293000	24306400	255,0,0
chr10	24306400	24312200	2	0	.	24306400	24312200	255,255,51
chr10	24312200	24312600	1	0	.	24312200	24312600	0,153,0
chr10	24312600	24469800	2	0	.	24312600	24469800	255,255,51
chr10	24469800	24471200	1	0	.	24469800	24471200	0,153,0
chr10	24471200	24592600	2	0	.	24471200	24592600	255,255,51
chr10	24592600	24598600	3	0	.	24592600	24598600	255,0,0
chr10	24598600	24630600	2	0	.	24598600	24630600	255,255,51
chr10	24630600	24630800	1	0	.	24630600	24630800	0,153,0
chr10	24630800	24651200	2	0	.	24630800	24651200	255,255,51
chr10	24651200	24651600	1	0	.	24651200	24651600	0,153,0
chr10	24651600	24710400	2	0	.	24651600	24710400	255,255,51
chr10	24710400	24712800	1	0	.	24710400	24712800	0,153,0
chr10	24712800	24753600	2	0	.	24712800	24753600	255,255,51
chr10	24753600	24755600	1	0	.	24753600	24755600	0,153,0
chr10	24755600	24823000	2	0	.	24755600	24823000	255,255,51
chr10	24823000	24824200	1	0	.	24823000	24824200	0,153,0
chr10	24824200	24869400	2	0	.	24824200	24869400	255,255,51
chr10	24869400	24871000	1	0	.	24869400	24871000	0,153,0
chr10	24871000	25151400	2	0	.	24871000	25151400	255,255,51
chr10	25151400	25151600	1	0	.	25151400	25151600	0,153,0
chr10	25151600	25179200	2	0	.	25151600	25179200	255,255,51
chr10	25179200	25193400	3	0	.	25179200	25193400	255,0,0
chr10	25193400	25197000	2	0	.	25193400	25197000	255,255,51
chr10	25197000	25201800	3	0	.	25197000	25201800	255,0,0
chr10	25201800	25296200	2	0	.	25201800	25296200	255,255,51
chr10	25296200	25298000	1	0	.	25296200	25298000	0,153,0
chr10	25298000	25359200	2	0	.	25298000	25359200	255,255,51
chr10	25359200	25361200	1	0	.	25359200	25361200	0,153,0
chr10	25361200	25388400	2	0	.	25361200	25388400	255,255,51
chr10	25388400	25390200	1	0	.	25388400	25390200	0,153,0
chr10	25390200	25433000	2	0	.	25390200	25433000	255,255,51
chr10	25433000	25435200	1	0	.	25433000	25435200	0,153,0
chr10	25435200	25456400	2	0	.	25435200	25456400	255,255,51
chr10	25456400	25458000	1	0	.	25456400	25458000	0,153,0
chr10	25458000	25859200	2	0	.	25458000	25859200	255,255,51
chr10	25859200	25859800	3	0	.	25859200	25859800	255,0,0
chr10	25859800	25982000	2	0	.	25859800	25982000	255,255,51
chr10	25982000	25984000	3	0	.	25982000	25984000	255,0,0
chr10	25984000	26021600	2	0	.	25984000	26021600	255,255,51
chr10	26021600	26024600	3	0	.	26021600	26024600	255,0,0
chr10	26024600	26031000	2	0	.	26024600	26031000	255,255,51
chr10	26031000	26033400	3	0	.	26031000	26033400	255,0,0
chr10	26033400	26039800	2	0	.	26033400	26039800	255,255,51
chr10	26039800	26040600	1	0	.	26039800	26040600	0,153,0
chr10	26040600	26044800	2	0	.	26040600	26044800	255,255,51
chr10	26044800	26056200	3	0	.	26044800	26056200	255,0,0
chr10	26056200	26065200	2	0	.	26056200	26065200	255,255,51
chr10	26065200	26077800	3	0	.	26065200	26077800	255,0,0
chr10	26077800	26079200	1	0	.	26077800	26079200	0,153,0
chr10	26079200	26081400	3	0	.	26079200	26081400	255,0,0
chr10	26081400	26090600	2	0	.	26081400	26090600	255,255,51
chr10	26090600	26092200	3	0	.	26090600	26092200	255,0,0
chr10	26092200	26202800	2	0	.	26092200	26202800	255,255,51
chr10	26202800	26203400	1	0	.	26202800	26203400	0,153,0
chr10	26203400	26204200	2	0	.	26203400	26204200	255,255,51
chr10	26204200	26205000	1	0	.	26204200	26205000	0,153,0
chr10	26205000	26227200	2	0	.	26205000	26227200	255,255,51
chr10	26227200	26236000	1	0	.	26227200	26236000	0,153,0
chr10	26236000	26322000	2	0	.	26236000	26322000	255,255,51
chr10	26322000	26323400	1	0	.	26322000	26323400	0,153,0
chr10	26323400	26325000	2	0	.	26323400	26325000	255,255,51
chr10	26325000	26326600	1	0	.	26325000	26326600	0,153,0
chr10	26326600	26364200	2	0	.	26326600	26364200	255,255,51
chr10	26364200	26365200	1	0	.	26364200	26365200	0,153,0
chr10	26365200	26372600	2	0	.	26365200	26372600	255,255,51
chr10	26372600	26376800	1	0	.	26372600	26376800	0,153,0
chr10	26376800	26502000	2	0	.	26376800	26502000	255,255,51
chr10	26502000	26502800	1	0	.	26502000	26502800	0,153,0
chr10	26502800	26520800	2	0	.	26502800	26520800	255,255,51
chr10	26520800	26521600	1	0	.	26520800	26521600	0,153,0
chr10	26521600	26691800	2	0	.	26521600	26691800	255,255,51
chr10	26691800	26698200	3	0	.	26691800	26698200	255,0,0
chr10	26698200	26772200	2	0	.	26698200	26772200	255,255,51
chr10	26772200	26775200	1	0	.	26772200	26775200	0,153,0
chr10	26775200	26780400	2	0	.	26775200	26780400	255,255,51
chr10	26780400	26782800	1	0	.	26780400	26782800	0,153,0
chr10	26782800	26789400	2	0	.	26782800	26789400	255,255,51
chr10	26789400	26792800	1	0	.	26789400	26792800	0,153,0
chr10	26792800	26797200	2	0	.	26792800	26797200	255,255,51
chr10	26797200	26802200	1	0	.	26797200	26802200	0,153,0
chr10	26802200	26828000	2	0	.	26802200	26828000	255,255,51
chr10	26828000	26829000	1	0	.	26828000	26829000	0,153,0
chr10	26829000	28072600	2	0	.	26829000	28072600	255,255,51
chr10	28072600	28074000	3	0	.	28072600	28074000	255,0,0
chr10	28074000	28076400	1	0	.	28074000	28076400	0,153,0
chr10	28076400	28078400	3	0	.	28076400	28078400	255,0,0
chr10	28078400	28513400	2	0	.	28078400	28513400	255,255,51
chr10	28513400	28513800	1	0	.	28513400	28513800	0,153,0
chr10	28513800	28516000	2	0	.	28513800	28516000	255,255,51
chr10	28516000	28516800	1	0	.	28516000	28516800	0,153,0
chr10	28516800	28579400	2	0	.	28516800	28579400	255,255,51
chr10	28579400	28593400	3	0	.	28579400	28593400	255,0,0
chr10	28593400	28594600	1	0	.	28593400	28594600	0,153,0
chr10	28594600	28612000	3	0	.	28594600	28612000	255,0,0
chr10	28612000	29144200	2	0	.	28612000	29144200	255,255,51
chr10	29144200	29146200	3	0	.	29144200	29146200	255,0,0
chr10	29146200	29311800	2	0	.	29146200	29311800	255,255,51
chr10	29311800	29315200	1	0	.	29311800	29315200	0,153,0
chr10	29315200	29359600	2	0	.	29315200	29359600	255,255,51
chr10	29359600	29363200	1	0	.	29359600	29363200	0,153,0
chr10	29363200	29531600	2	0	.	29363200	29531600	255,255,51
chr10	29531600	29537200	3	0	.	29531600	29537200	255,0,0
chr10	29537200	30198200	2	0	.	29537200	30198200	255,255,51
chr10	30198200	30201200	1	0	.	30198200	30201200	0,153,0
chr10	30201200	30538600	2	0	.	30201200	30538600	255,255,51
chr10	30538600	30539600	1	0	.	30538600	30539600	0,153,0
chr10	30539600	30599200	2	0	.	30539600	30599200	255,255,51
chr10	30599200	30601200	1	0	.	30599200	30601200	0,153,0
chr10	30601200	30616400	2	0	.	30601200	30616400	255,255,51
chr10	30616400	30619400	1	0	.	30616400	30619400	0,153,0
chr10	30619400	30623000	2	0	.	30619400	30623000	255,255,51
chr10	30623000	30623200	1	0	.	30623000	30623200	0,153,0
chr10	30623200	30654600	2	0	.	30623200	30654600	255,255,51
chr10	30654600	30656000	1	0	.	30654600	30656000	0,153,0
chr10	30656000	30679400	2	0	.	30656000	30679400	255,255,51
chr10	30679400	30680200	1	0	.	30679400	30680200	0,153,0
chr10	30680200	30715600	2	0	.	30680200	30715600	255,255,51
chr10	30715600	30717000	1	0	.	30715600	30717000	0,153,0
chr10	30717000	30719000	2	0	.	30717000	30719000	255,255,51
chr10	30719000	30719400	1	0	.	30719000	30719400	0,153,0
chr10	30719400	30801400	2	0	.	30719400	30801400	255,255,51
chr10	30801400	30804400	1	0	.	30801400	30804400	0,153,0
chr10	30804400	30810400	2	0	.	30804400	30810400	255,255,51
chr10	30810400	30811400	1	0	.	30810400	30811400	0,153,0
chr10	30811400	30830800	2	0	.	30811400	30830800	255,255,51
chr10	30830800	30841600	3	0	.	30830800	30841600	255,0,0
chr10	30841600	30844000	1	0	.	30841600	30844000	0,153,0
chr10	30844000	30850000	3	0	.	30844000	30850000	255,0,0
chr10	30850000	31313000	2	0	.	30850000	31313000	255,255,51
chr10	31313000	31314800	1	0	.	31313000	31314800	0,153,0
chr10	31314800	31445400	2	0	.	31314800	31445400	255,255,51
chr10	31445400	31446200	1	0	.	31445400	31446200	0,153,0
chr10	31446200	31465400	2	0	.	31446200	31465400	255,255,51
chr10	31465400	31466000	1	0	.	31465400	31466000	0,153,0
chr10	31466000	31606800	2	0	.	31466000	31606800	255,255,51
chr10	31606800	31610200	1	0	.	31606800	31610200	0,153,0
chr10	31610200	33905800	2	0	.	31610200	33905800	255,255,51
chr10	33905800	33908600	3	0	.	33905800	33908600	255,0,0
chr10	33908600	33948000	2	0	.	33908600	33948000	255,255,51
chr10	33948000	33951800	1	0	.	33948000	33951800	0,153,0
chr10	33951800	34018000	2	0	.	33951800	34018000	255,255,51
chr10	34018000	34021400	1	0	.	34018000	34021400	0,153,0
chr10	34021400	34029000	2	0	.	34021400	34029000	255,255,51
chr10	34029000	34029200	1	0	.	34029000	34029200	0,153,0
chr10	34029200	34030200	2	0	.	34029200	34030200	255,255,51
chr10	34030200	34031400	1	0	.	34030200	34031400	0,153,0
chr10	34031400	34089200	2	0	.	34031400	34089200	255,255,51
chr10	34089200	34090200	1	0	.	34089200	34090200	0,153,0
chr10	34090200	34096600	2	0	.	34090200	34096600	255,255,51
chr10	34096600	34097000	1	0	.	34096600	34097000	0,153,0
chr10	34097000	34110200	2	0	.	34097000	34110200	255,255,51
chr10	34110200	34111600	1	0	.	34110200	34111600	0,153,0
chr10	34111600	34117400	2	0	.	34111600	34117400	255,255,51
chr10	34117400	34118800	1	0	.	34117400	34118800	0,153,0
chr10	34118800	34126600	2	0	.	34118800	34126600	255,255,51
chr10	34126600	34128600	1	0	.	34126600	34128600	0,153,0
chr10	34128600	34169800	2	0	.	34128600	34169800	255,255,51
chr10	34169800	34173800	1	0	.	34169800	34173800	0,153,0
chr10	34173800	34175000	2	0	.	34173800	34175000	255,255,51
chr10	34175000	34175200	1	0	.	34175000	34175200	0,153,0
chr10	34175200	34175600	2	0	.	34175200	34175600	255,255,51
chr10	34175600	34177000	1	0	.	34175600	34177000	0,153,0
chr10	34177000	34185400	2	0	.	34177000	34185400	255,255,51
chr10	34185400	34187600	1	0	.	34185400	34187600	0,153,0
chr10	34187600	34195200	2	0	.	34187600	34195200	255,255,51
chr10	34195200	34195600	1	0	.	34195200	34195600	0,153,0
chr10	34195600	34196800	2	0	.	34195600	34196800	255,255,51
chr10	34196800	34199600	1	0	.	34196800	34199600	0,153,0
chr10	34199600	34205800	2	0	.	34199600	34205800	255,255,51
chr10	34205800	34208200	1	0	.	34205800	34208200	0,153,0
chr10	34208200	34235400	2	0	.	34208200	34235400	255,255,51
chr10	34235400	34235600	1	0	.	34235400	34235600	0,153,0
chr10	34235600	34280600	2	0	.	34235600	34280600	255,255,51
chr10	34280600	34286600	1	0	.	34280600	34286600	0,153,0
chr10	34286600	34296800	2	0	.	34286600	34296800	255,255,51
chr10	34296800	34299000	1	0	.	34296800	34299000	0,153,0
chr10	34299000	34337400	2	0	.	34299000	34337400	255,255,51
chr10	34337400	34346800	3	0	.	34337400	34346800	255,0,0
chr10	34346800	34416000	2	0	.	34346800	34416000	255,255,51
chr10	34416000	34418800	1	0	.	34416000	34418800	0,153,0
chr10	34418800	36158000	2	0	.	34418800	36158000	255,255,51
chr10	36158000	36159000	1	0	.	36158000	36159000	0,153,0
chr10	36159000	36973600	2	0	.	36159000	36973600	255,255,51
chr10	36973600	36976200	1	0	.	36973600	36976200	0,153,0
chr10	36976200	37132400	2	0	.	36976200	37132400	255,255,51
chr10	37132400	37135600	3	0	.	37132400	37135600	255,0,0
chr10	37135600	37141600	1	0	.	37135600	37141600	0,153,0
chr10	37141600	37147200	3	0	.	37141600	37147200	255,0,0
chr10	37147200	37192800	2	0	.	37147200	37192800	255,255,51
chr10	37192800	37193400	1	0	.	37192800	37193400	0,153,0
chr10	37193400	37235600	2	0	.	37193400	37235600	255,255,51
chr10	37235600	37237000	1	0	.	37235600	37237000	0,153,0
chr10	37237000	37283200	2	0	.	37237000	37283200	255,255,51
chr10	37283200	37283400	1	0	.	37283200	37283400	0,153,0
chr10	37283400	37336600	2	0	.	37283400	37336600	255,255,51
chr10	37336600	37338200	1	0	.	37336600	37338200	0,153,0
chr10	37338200	37381400	2	0	.	37338200	37381400	255,255,51
chr10	37381400	37382600	1	0	.	37381400	37382600	0,153,0
chr10	37382600	38884200	2	0	.	37382600	38884200	255,255,51
chr10	38884200	38887000	1	0	.	38884200	38887000	0,153,0
chr10	38887000	38964600	2	0	.	38887000	38964600	255,255,51
chr10	38964600	38967000	3	0	.	38964600	38967000	255,0,0
chr10	38967000	39022400	2	0	.	38967000	39022400	255,255,51
chr10	39022400	39025800	1	0	.	39022400	39025800	0,153,0
chr10	39025800	39133600	2	0	.	39025800	39133600	255,255,51
chr10	39133600	39135200	1	0	.	39133600	39135200	0,153,0
chr10	39135200	39171000	2	0	.	39135200	39171000	255,255,51
chr10	39171000	39172200	1	0	.	39171000	39172200	0,153,0
chr10	39172200	39192000	2	0	.	39172200	39192000	255,255,51
chr10	39192000	39193400	1	0	.	39192000	39193400	0,153,0
chr10	39193400	39239800	2	0	.	39193400	39239800	255,255,51
chr10	39239800	39243400	1	0	.	39239800	39243400	0,153,0
chr10	39243400	39249400	2	0	.	39243400	39249400	255,255,51
chr10	39249400	39250600	1	0	.	39249400	39250600	0,153,0
chr10	39250600	39266000	2	0	.	39250600	39266000	255,255,51
chr10	39266000	39267000	1	0	.	39266000	39267000	0,153,0
chr10	39267000	39292400	2	0	.	39267000	39292400	255,255,51
chr10	39292400	39293200	1	0	.	39292400	39293200	0,153,0
chr10	39293200	39308000	2	0	.	39293200	39308000	255,255,51
chr10	39308000	39309000	1	0	.	39308000	39309000	0,153,0
chr10	39309000	39311400	2	0	.	39309000	39311400	255,255,51
chr10	39311400	39311800	1	0	.	39311400	39311800	0,153,0
chr10	39311800	39314600	2	0	.	39311800	39314600	255,255,51
chr10	39314600	39315800	1	0	.	39314600	39315800	0,153,0
chr10	39315800	39338000	2	0	.	39315800	39338000	255,255,51
chr10	39338000	39340600	1	0	.	39338000	39340600	0,153,0
chr10	39340600	39358400	2	0	.	39340600	39358400	255,255,51
chr10	39358400	39358800	1	0	.	39358400	39358800	0,153,0
chr10	39358800	39367200	2	0	.	39358800	39367200	255,255,51
chr10	39367200	39374400	1	0	.	39367200	39374400	0,153,0
chr10	39374400	39375200	2	0	.	39374400	39375200	255,255,51
chr10	39375200	39376600	1	0	.	39375200	39376600	0,153,0
chr10	39376600	39386200	2	0	.	39376600	39386200	255,255,51
chr10	39386200	39389000	1	0	.	39386200	39389000	0,153,0
chr10	39389000	39390400	2	0	.	39389000	39390400	255,255,51
chr10	39390400	39391200	1	0	.	39390400	39391200	0,153,0
chr10	39391200	39392600	2	0	.	39391200	39392600	255,255,51
chr10	39392600	39393000	1	0	.	39392600	39393000	0,153,0
chr10	39393000	39401800	2	0	.	39393000	39401800	255,255,51
chr10	39401800	39403000	1	0	.	39401800	39403000	0,153,0
chr10	39403000	39414600	2	0	.	39403000	39414600	255,255,51
chr10	39414600	39416000	1	0	.	39414600	39416000	0,153,0
chr10	39416000	39420600	2	0	.	39416000	39420600	255,255,51
chr10	39420600	39421800	1	0	.	39420600	39421800	0,153,0
chr10	39421800	39434400	2	0	.	39421800	39434400	255,255,51
chr10	39434400	39437000	1	0	.	39434400	39437000	0,153,0
chr10	39437000	39448600	2	0	.	39437000	39448600	255,255,51
chr10	39448600	39449400	1	0	.	39448600	39449400	0,153,0
chr10	39449400	39454600	2	0	.	39449400	39454600	255,255,51
chr10	39454600	39457200	1	0	.	39454600	39457200	0,153,0
chr10	39457200	39462800	2	0	.	39457200	39462800	255,255,51
chr10	39462800	39463200	1	0	.	39462800	39463200	0,153,0
chr10	39463200	39468600	2	0	.	39463200	39468600	255,255,51
chr10	39468600	39473000	1	0	.	39468600	39473000	0,153,0
chr10	39473000	39478000	2	0	.	39473000	39478000	255,255,51
chr10	39478000	39480400	1	0	.	39478000	39480400	0,153,0
chr10	39480400	39484000	2	0	.	39480400	39484000	255,255,51
chr10	39484000	39485000	1	0	.	39484000	39485000	0,153,0
chr10	39485000	39486000	2	0	.	39485000	39486000	255,255,51
chr10	39486000	39487200	1	0	.	39486000	39487200	0,153,0
chr10	39487200	39488000	2	0	.	39487200	39488000	255,255,51
chr10	39488000	39489000	1	0	.	39488000	39489000	0,153,0
chr10	39489000	39514200	2	0	.	39489000	39514200	255,255,51
chr10	39514200	39515200	1	0	.	39514200	39515200	0,153,0
chr10	39515200	39520400	2	0	.	39515200	39520400	255,255,51
chr10	39520400	39523200	1	0	.	39520400	39523200	0,153,0
chr10	39523200	39599600	2	0	.	39523200	39599600	255,255,51
chr10	39599600	39601200	1	0	.	39599600	39601200	0,153,0
chr10	39601200	39612000	2	0	.	39601200	39612000	255,255,51
chr10	39612000	39615400	1	0	.	39612000	39615400	0,153,0
chr10	39615400	39624200	2	0	.	39615400	39624200	255,255,51
chr10	39624200	39626000	1	0	.	39624200	39626000	0,153,0
chr10	39626000	39666000	2	0	.	39626000	39666000	255,255,51
chr10	39666000	39667000	1	0	.	39666000	39667000	0,153,0
chr10	39667000	39690400	2	0	.	39667000	39690400	255,255,51
chr10	39690400	39691400	1	0	.	39690400	39691400	0,153,0
chr10	39691400	39730200	2	0	.	39691400	39730200	255,255,51
chr10	39730200	39734800	1	0	.	39730200	39734800	0,153,0
chr10	39734800	39771400	2	0	.	39734800	39771400	255,255,51
chr10	39771400	39772000	1	0	.	39771400	39772000	0,153,0
chr10	39772000	39774200	2	0	.	39772000	39774200	255,255,51
chr10	39774200	39774800	1	0	.	39774200	39774800	0,153,0
chr10	39774800	39792800	2	0	.	39774800	39792800	255,255,51
chr10	39792800	39794000	1	0	.	39792800	39794000	0,153,0
chr10	39794000	39897600	2	0	.	39794000	39897600	255,255,51
chr10	39897600	39899400	1	0	.	39897600	39899400	0,153,0
chr10	39899400	39908600	2	0	.	39899400	39908600	255,255,51
chr10	39908600	39909400	1	0	.	39908600	39909400	0,153,0
chr10	39909400	39925400	2	0	.	39909400	39925400	255,255,51
chr10	39925400	39930600	3	0	.	39925400	39930600	255,0,0
chr10	39930600	39959200	2	0	.	39930600	39959200	255,255,51
chr10	39959200	39960600	1	0	.	39959200	39960600	0,153,0
chr10	39960600	39974800	2	0	.	39960600	39974800	255,255,51
chr10	39974800	39975400	1	0	.	39974800	39975400	0,153,0
chr10	39975400	40013200	2	0	.	39975400	40013200	255,255,51
chr10	40013200	40015600	3	0	.	40013200	40015600	255,0,0
chr10	40015600	40018800	2	0	.	40015600	40018800	255,255,51
chr10	40018800	40024800	3	0	.	40018800	40024800	255,0,0
chr10	40024800	40025600	1	0	.	40024800	40025600	0,153,0
chr10	40025600	40069600	2	0	.	40025600	40069600	255,255,51
chr10	40069600	40072000	1	0	.	40069600	40072000	0,153,0
chr10	40072000	40089800	2	0	.	40072000	40089800	255,255,51
chr10	40089800	40090200	1	0	.	40089800	40090200	0,153,0
chr10	40090200	40105400	2	0	.	40090200	40105400	255,255,51
chr10	40105400	40106600	1	0	.	40105400	40106600	0,153,0
chr10	40106600	40140200	2	0	.	40106600	40140200	255,255,51
chr10	40140200	40142600	1	0	.	40140200	40142600	0,153,0
chr10	40142600	40152400	2	0	.	40142600	40152400	255,255,51
chr10	40152400	40153600	1	0	.	40152400	40153600	0,153,0
chr10	40153600	40162400	2	0	.	40153600	40162400	255,255,51
chr10	40162400	40166600	1	0	.	40162400	40166600	0,153,0
chr10	40166600	40171200	2	0	.	40166600	40171200	255,255,51
chr10	40171200	40171600	1	0	.	40171200	40171600	0,153,0
chr10	40171600	40191000	2	0	.	40171600	40191000	255,255,51
chr10	40191000	40191800	1	0	.	40191000	40191800	0,153,0
chr10	40191800	40212400	2	0	.	40191800	40212400	255,255,51
chr10	40212400	40212800	1	0	.	40212400	40212800	0,153,0
chr10	40212800	40232400	2	0	.	40212800	40232400	255,255,51
chr10	40232400	40233400	1	0	.	40232400	40233400	0,153,0
chr10	40233400	40245800	2	0	.	40233400	40245800	255,255,51
chr10	40245800	40247800	1	0	.	40245800	40247800	0,153,0
chr10	40247800	40256600	2	0	.	40247800	40256600	255,255,51
chr10	40256600	40259600	1	0	.	40256600	40259600	0,153,0
chr10	40259600	40299400	2	0	.	40259600	40299400	255,255,51
chr10	40299400	40303600	1	0	.	40299400	40303600	0,153,0
chr10	40303600	40305400	3	0	.	40303600	40305400	255,0,0
chr10	40305400	40310000	2	0	.	40305400	40310000	255,255,51
chr10	40310000	40310800	1	0	.	40310000	40310800	0,153,0
chr10	40310800	40347400	2	0	.	40310800	40347400	255,255,51
chr10	40347400	40352000	1	0	.	40347400	40352000	0,153,0
chr10	40352000	40353200	2	0	.	40352000	40353200	255,255,51
chr10	40353200	40355200	1	0	.	40353200	40355200	0,153,0
chr10	40355200	40356000	2	0	.	40355200	40356000	255,255,51
chr10	40356000	40357000	1	0	.	40356000	40357000	0,153,0
chr10	40357000	40370400	2	0	.	40357000	40370400	255,255,51
chr10	40370400	40372800	1	0	.	40370400	40372800	0,153,0
chr10	40372800	40380000	2	0	.	40372800	40380000	255,255,51
chr10	40380000	40383200	1	0	.	40380000	40383200	0,153,0
chr10	40383200	40384800	2	0	.	40383200	40384800	255,255,51
chr10	40384800	40387200	1	0	.	40384800	40387200	0,153,0
chr10	40387200	40400000	2	0	.	40387200	40400000	255,255,51
chr10	40400000	40400800	1	0	.	40400000	40400800	0,153,0
chr10	40400800	40447400	2	0	.	40400800	40447400	255,255,51
chr10	40447400	40449800	1	0	.	40447400	40449800	0,153,0
chr10	40449800	40451600	2	0	.	40449800	40451600	255,255,51
chr10	40451600	40452600	1	0	.	40451600	40452600	0,153,0
chr10	40452600	40462000	2	0	.	40452600	40462000	255,255,51
chr10	40462000	40462600	1	0	.	40462000	40462600	0,153,0
chr10	40462600	40479200	2	0	.	40462600	40479200	255,255,51
chr10	40479200	40479600	1	0	.	40479200	40479600	0,153,0
chr10	40479600	40527600	2	0	.	40479600	40527600	255,255,51
chr10	40527600	40528400	1	0	.	40527600	40528400	0,153,0
chr10	40528400	40529600	2	0	.	40528400	40529600	255,255,51
chr10	40529600	40530000	1	0	.	40529600	40530000	0,153,0
chr10	40530000	40598000	2	0	.	40530000	40598000	255,255,51
chr10	40598000	40598600	3	0	.	40598000	40598600	255,0,0
chr10	40598600	40610600	2	0	.	40598600	40610600	255,255,51
chr10	40610600	40616800	3	0	.	40610600	40616800	255,0,0
chr10	40616800	40679800	2	0	.	40616800	40679800	255,255,51
chr10	40679800	40687600	3	0	.	40679800	40687600	255,0,0
chr10	40687600	40693800	2	0	.	40687600	40693800	255,255,51
chr10	40693800	40698400	3	0	.	40693800	40698400	255,0,0
chr10	40698400	40705600	2	0	.	40698400	40705600	255,255,51
chr10	40705600	40709800	3	0	.	40705600	40709800	255,0,0
chr10	40709800	40723400	2	0	.	40709800	40723400	255,255,51
chr10	40723400	40732600	3	0	.	40723400	40732600	255,0,0
chr10	40732600	40749600	2	0	.	40732600	40749600	255,255,51
chr10	40749600	40751200	3	0	.	40749600	40751200	255,0,0
chr10	40751200	40766400	2	0	.	40751200	40766400	255,255,51
chr10	40766400	40768200	3	0	.	40766400	40768200	255,0,0
chr10	40768200	40785400	2	0	.	40768200	40785400	255,255,51
chr10	40785400	40787400	3	0	.	40785400	40787400	255,0,0
chr10	40787400	40881200	2	0	.	40787400	40881200	255,255,51
chr10	40881200	40885200	1	0	.	40881200	40885200	0,153,0
chr10	40885200	40895600	3	0	.	40885200	40895600	255,0,0
chr10	40895600	40901400	2	0	.	40895600	40901400	255,255,51
chr10	40901400	40909000	3	0	.	40901400	40909000	255,0,0
chr10	40909000	40926200	2	0	.	40909000	40926200	255,255,51
chr10	40926200	40927600	3	0	.	40926200	40927600	255,0,0
chr10	40927600	40968600	2	0	.	40927600	40968600	255,255,51
chr10	40968600	40973400	3	0	.	40968600	40973400	255,0,0
chr10	40973400	41069800	2	0	.	40973400	41069800	255,255,51
chr10	41069800	41074000	3	0	.	41069800	41074000	255,0,0
chr10	41074000	41129600	2	0	.	41074000	41129600	255,255,51
chr10	41129600	41131200	3	0	.	41129600	41131200	255,0,0
chr10	41131200	41301800	2	0	.	41131200	41301800	255,255,51
chr10	41301800	41304400	1	0	.	41301800	41304400	0,153,0
chr10	41304400	41365400	2	0	.	41304400	41365400	255,255,51
chr10	41365400	41367000	3	0	.	41365400	41367000	255,0,0
chr10	41367000	41449200	2	0	.	41367000	41449200	255,255,51
chr10	41449200	41451400	1	0	.	41449200	41451400	0,153,0
chr10	41451400	41472400	2	0	.	41451400	41472400	255,255,51
chr10	41472400	41478600	1	0	.	41472400	41478600	0,153,0
chr10	41478600	41488800	2	0	.	41478600	41488800	255,255,51
chr10	41488800	41491800	1	0	.	41488800	41491800	0,153,0
chr10	41491800	41518000	2	0	.	41491800	41518000	255,255,51
chr10	41518000	41527800	1	0	.	41518000	41527800	0,153,0
chr10	41527800	41529200	2	0	.	41527800	41529200	255,255,51
chr10	41529200	41531000	1	0	.	41529200	41531000	0,153,0
chr10	41531000	41536400	2	0	.	41531000	41536400	255,255,51
chr10	41536400	41537200	1	0	.	41536400	41537200	0,153,0
chr10	41537200	41552200	2	0	.	41537200	41552200	255,255,51
chr10	41552200	41553000	1	0	.	41552200	41553000	0,153,0
chr10	41553000	41594400	2	0	.	41553000	41594400	255,255,51
chr10	41594400	41596200	1	0	.	41594400	41596200	0,153,0
chr10	41596200	41598200	2	0	.	41596200	41598200	255,255,51
chr10	41598200	41598800	1	0	.	41598200	41598800	0,153,0
chr10	41598800	41599800	2	0	.	41598800	41599800	255,255,51
chr10	41599800	41600200	1	0	.	41599800	41600200	0,153,0
chr10	41600200	41602000	2	0	.	41600200	41602000	255,255,51
chr10	41602000	41603000	1	0	.	41602000	41603000	0,153,0
chr10	41603000	41604800	2	0	.	41603000	41604800	255,255,51
chr10	41604800	41607200	1	0	.	41604800	41607200	0,153,0
chr10	41607200	41619600	2	0	.	41607200	41619600	255,255,51
chr10	41619600	41620600	1	0	.	41619600	41620600	0,153,0
chr10	41620600	41682800	2	0	.	41620600	41682800	255,255,51
chr10	41682800	41683200	1	0	.	41682800	41683200	0,153,0
chr10	41683200	41686600	3	0	.	41683200	41686600	255,0,0
chr10	41686600	41690000	2	0	.	41686600	41690000	255,255,51
chr10	41690000	41690600	1	0	.	41690000	41690600	0,153,0
chr10	41690600	41693800	3	0	.	41690600	41693800	255,0,0
chr10	41693800	41709400	2	0	.	41693800	41709400	255,255,51
chr10	41709400	41710000	1	0	.	41709400	41710000	0,153,0
chr10	41710000	41711600	2	0	.	41710000	41711600	255,255,51
chr10	41711600	41715200	1	0	.	41711600	41715200	0,153,0
chr10	41715200	41751600	2	0	.	41715200	41751600	255,255,51
chr10	41751600	41752200	1	0	.	41751600	41752200	0,153,0
chr10	41752200	41766800	2	0	.	41752200	41766800	255,255,51
chr10	41766800	41767800	1	0	.	41766800	41767800	0,153,0
chr10	41767800	41808400	2	0	.	41767800	41808400	255,255,51
chr10	41808400	41814600	1	0	.	41808400	41814600	0,153,0
chr10	41814600	41822400	2	0	.	41814600	41822400	255,255,51
chr10	41822400	41823200	1	0	.	41822400	41823200	0,153,0
chr10	41823200	41831000	2	0	.	41823200	41831000	255,255,51
chr10	41831000	41831200	1	0	.	41831000	41831200	0,153,0
chr10	41831200	41838200	2	0	.	41831200	41838200	255,255,51
chr10	41838200	41839200	1	0	.	41838200	41839200	0,153,0
chr10	41839200	41862800	2	0	.	41839200	41862800	255,255,51
chr10	41862800	41863600	1	0	.	41862800	41863600	0,153,0
chr10	41863600	41868000	2	0	.	41863600	41868000	255,255,51
chr10	41868000	41868400	1	0	.	41868000	41868400	0,153,0
chr10	41868400	41880200	2	0	.	41868400	41880200	255,255,51
chr10	41880200	41881000	1	0	.	41880200	41881000	0,153,0
chr10	41881000	41885600	2	0	.	41881000	41885600	255,255,51
chr10	41885600	41894600	1	0	.	41885600	41894600	0,153,0
chr10	41894600	41910000	2	0	.	41894600	41910000	255,255,51
chr10	41910000	41911400	1	0	.	41910000	41911400	0,153,0
chr10	41911400	41935800	2	0	.	41911400	41935800	255,255,51
chr10	41935800	41938000	1	0	.	41935800	41938000	0,153,0
chr10	41938000	41957400	2	0	.	41938000	41957400	255,255,51
chr10	41957400	41958200	1	0	.	41957400	41958200	0,153,0
chr10	41958200	41972600	2	0	.	41958200	41972600	255,255,51
chr10	41972600	41973200	1	0	.	41972600	41973200	0,153,0
chr10	41973200	41976600	2	0	.	41973200	41976600	255,255,51
chr10	41976600	41981400	1	0	.	41976600	41981400	0,153,0
chr10	41981400	42018000	2	0	.	41981400	42018000	255,255,51
chr10	42018000	42019200	1	0	.	42018000	42019200	0,153,0
chr10	42019200	42027200	2	0	.	42019200	42027200	255,255,51
chr10	42027200	42028400	1	0	.	42027200	42028400	0,153,0
chr10	42028400	42031000	2	0	.	42028400	42031000	255,255,51
chr10	42031000	42031400	1	0	.	42031000	42031400	0,153,0
chr10	42031400	42051600	2	0	.	42031400	42051600	255,255,51
chr10	42051600	42053000	1	0	.	42051600	42053000	0,153,0
chr10	42053000	42055200	2	0	.	42053000	42055200	255,255,51
chr10	42055200	42058400	1	0	.	42055200	42058400	0,153,0
chr10	42058400	42068000	2	0	.	42058400	42068000	255,255,51
chr10	42068000	42069800	1	0	.	42068000	42069800	0,153,0
chr10	42069800	42192200	2	0	.	42069800	42192200	255,255,51
chr10	42192200	42195600	1	0	.	42192200	42195600	0,153,0
chr10	42195600	42206000	2	0	.	42195600	42206000	255,255,51
chr10	42206000	42206400	1	0	.	42206000	42206400	0,153,0
chr10	42206400	42219000	2	0	.	42206400	42219000	255,255,51
chr10	42219000	42221400	1	0	.	42219000	42221400	0,153,0
chr10	42221400	42268600	2	0	.	42221400	42268600	255,255,51
chr10	42268600	42278800	1	0	.	42268600	42278800	0,153,0
chr10	42278800	42293800	2	0	.	42278800	42293800	255,255,51
chr10	42293800	42295400	1	0	.	42293800	42295400	0,153,0
chr10	42295400	42477200	2	0	.	42295400	42477200	255,255,51
chr10	42477200	42479200	1	0	.	42477200	42479200	0,153,0
chr10	42479200	42501400	2	0	.	42479200	42501400	255,255,51
chr10	42501400	42504600	1	0	.	42501400	42504600	0,153,0
chr10	42504600	42505200	2	0	.	42504600	42505200	255,255,51
chr10	42505200	42505400	1	0	.	42505200	42505400	0,153,0
chr10	42505400	42546600	2	0	.	42505400	42546600	255,255,51
chr10	42546600	42550200	3	0	.	42546600	42550200	255,0,0
chr10	42550200	42560600	2	0	.	42550200	42560600	255,255,51
chr10	42560600	42591200	3	0	.	42560600	42591200	255,0,0
chr10	42591200	42592000	1	0	.	42591200	42592000	0,153,0
chr10	42592000	42631800	3	0	.	42592000	42631800	255,0,0
chr10	42631800	42634200	1	0	.	42631800	42634200	0,153,0
chr10	42634200	42637400	3	0	.	42634200	42637400	255,0,0
chr10	42637400	42678600	2	0	.	42637400	42678600	255,255,51
chr10	42678600	42680800	1	0	.	42678600	42680800	0,153,0
chr10	42680800	42711600	2	0	.	42680800	42711600	255,255,51
chr10	42711600	42721400	3	0	.	42711600	42721400	255,0,0
chr10	42721400	42724600	2	0	.	42721400	42724600	255,255,51
chr10	42724600	42729400	3	0	.	42724600	42729400	255,0,0
chr10	42729400	42754400	2	0	.	42729400	42754400	255,255,51
chr10	42754400	42759200	3	0	.	42754400	42759200	255,0,0
chr10	42759200	42761000	2	0	.	42759200	42761000	255,255,51
chr10	42761000	42764600	1	0	.	42761000	42764600	0,153,0
chr10	42764600	42837800	2	0	.	42764600	42837800	255,255,51
chr10	42837800	42839400	1	0	.	42837800	42839400	0,153,0
chr10	42839400	42859800	2	0	.	42839400	42859800	255,255,51
chr10	42859800	42864600	1	0	.	42859800	42864600	0,153,0
chr10	42864600	42886600	2	0	.	42864600	42886600	255,255,51
chr10	42886600	42889800	1	0	.	42886600	42889800	0,153,0
chr10	42889800	42897200	2	0	.	42889800	42897200	255,255,51
chr10	42897200	42898200	1	0	.	42897200	42898200	0,153,0
chr10	42898200	42934400	2	0	.	42898200	42934400	255,255,51
chr10	42934400	42935600	1	0	.	42934400	42935600	0,153,0
chr10	42935600	42962000	2	0	.	42935600	42962000	255,255,51
chr10	42962000	42963200	1	0	.	42962000	42963200	0,153,0
chr10	42963200	43001200	2	0	.	42963200	43001200	255,255,51
chr10	43001200	43026400	3	0	.	43001200	43026400	255,0,0
chr10	43026400	43102400	2	0	.	43026400	43102400	255,255,51
chr10	43102400	43104000	3	0	.	43102400	43104000	255,0,0
chr10	43104000	43141200	2	0	.	43104000	43141200	255,255,51
chr10	43141200	43148000	3	0	.	43141200	43148000	255,0,0
chr10	43148000	43149800	2	0	.	43148000	43149800	255,255,51
chr10	43149800	43150800	3	0	.	43149800	43150800	255,0,0
chr10	43150800	43158400	2	0	.	43150800	43158400	255,255,51
chr10	43158400	43163400	3	0	.	43158400	43163400	255,0,0
chr10	43163400	43167200	2	0	.	43163400	43167200	255,255,51
chr10	43167200	43172800	3	0	.	43167200	43172800	255,0,0
chr10	43172800	43174400	1	0	.	43172800	43174400	0,153,0
chr10	43174400	43194600	3	0	.	43174400	43194600	255,0,0
chr10	43194600	43219800	2	0	.	43194600	43219800	255,255,51
chr10	43219800	43222600	1	0	.	43219800	43222600	0,153,0
chr10	43222600	43330200	2	0	.	43222600	43330200	255,255,51
chr10	43330200	43331200	1	0	.	43330200	43331200	0,153,0
chr10	43331200	43452000	2	0	.	43331200	43452000	255,255,51
chr10	43452000	43452600	1	0	.	43452000	43452600	0,153,0
chr10	43452600	43478000	2	0	.	43452600	43478000	255,255,51
chr10	43478000	43480800	1	0	.	43478000	43480800	0,153,0
chr10	43480800	43539800	2	0	.	43480800	43539800	255,255,51
chr10	43539800	43541400	1	0	.	43539800	43541400	0,153,0
chr10	43541400	43574800	2	0	.	43541400	43574800	255,255,51
chr10	43574800	43577600	3	0	.	43574800	43577600	255,0,0
chr10	43577600	43579400	1	0	.	43577600	43579400	0,153,0
chr10	43579400	43593200	3	0	.	43579400	43593200	255,0,0
chr10	43593200	43721600	2	0	.	43593200	43721600	255,255,51
chr10	43721600	43725600	3	0	.	43721600	43725600	255,0,0
chr10	43725600	43729000	2	0	.	43725600	43729000	255,255,51
chr10	43729000	43730200	3	0	.	43729000	43730200	255,0,0
chr10	43730200	43753800	2	0	.	43730200	43753800	255,255,51
chr10	43753800	43756200	3	0	.	43753800	43756200	255,0,0
chr10	43756200	43900400	2	0	.	43756200	43900400	255,255,51
chr10	43900400	43902800	1	0	.	43900400	43902800	0,153,0
chr10	43902800	43934600	2	0	.	43902800	43934600	255,255,51
chr10	43934600	43935000	1	0	.	43934600	43935000	0,153,0
chr10	43935000	43968800	2	0	.	43935000	43968800	255,255,51
chr10	43968800	43969600	1	0	.	43968800	43969600	0,153,0
chr10	43969600	43980200	2	0	.	43969600	43980200	255,255,51
chr10	43980200	43980800	1	0	.	43980200	43980800	0,153,0
chr10	43980800	43995600	2	0	.	43980800	43995600	255,255,51
chr10	43995600	43998800	1	0	.	43995600	43998800	0,153,0
chr10	43998800	44002600	2	0	.	43998800	44002600	255,255,51
chr10	44002600	44004400	1	0	.	44002600	44004400	0,153,0
chr10	44004400	44019200	3	0	.	44004400	44019200	255,0,0
chr10	44019200	44028400	2	0	.	44019200	44028400	255,255,51
chr10	44028400	44032800	3	0	.	44028400	44032800	255,0,0
chr10	44032800	44036800	2	0	.	44032800	44036800	255,255,51
chr10	44036800	44043800	3	0	.	44036800	44043800	255,0,0
chr10	44043800	44048200	2	0	.	44043800	44048200	255,255,51
chr10	44048200	44062400	3	0	.	44048200	44062400	255,0,0
chr10	44062400	44067200	2	0	.	44062400	44067200	255,255,51
chr10	44067200	44085800	3	0	.	44067200	44085800	255,0,0
chr10	44085800	44092400	2	0	.	44085800	44092400	255,255,51
chr10	44092400	44094000	3	0	.	44092400	44094000	255,0,0
chr10	44094000	44115400	2	0	.	44094000	44115400	255,255,51
chr10	44115400	44120800	3	0	.	44115400	44120800	255,0,0
chr10	44120800	44144400	2	0	.	44120800	44144400	255,255,51
chr10	44144400	44153200	3	0	.	44144400	44153200	255,0,0
chr10	44153200	44176000	2	0	.	44153200	44176000	255,255,51
chr10	44176000	44194400	3	0	.	44176000	44194400	255,0,0
chr10	44194400	44199000	2	0	.	44194400	44199000	255,255,51
chr10	44199000	44201000	3	0	.	44199000	44201000	255,0,0
chr10	44201000	44267400	2	0	.	44201000	44267400	255,255,51
chr10	44267400	44270200	1	0	.	44267400	44270200	0,153,0
chr10	44270200	44281800	2	0	.	44270200	44281800	255,255,51
chr10	44281800	44283200	1	0	.	44281800	44283200	0,153,0
chr10	44283200	44321200	2	0	.	44283200	44321200	255,255,51
chr10	44321200	44323200	1	0	.	44321200	44323200	0,153,0
chr10	44323200	44328200	2	0	.	44323200	44328200	255,255,51
chr10	44328200	44328800	1	0	.	44328200	44328800	0,153,0
chr10	44328800	44341200	2	0	.	44328800	44341200	255,255,51
chr10	44341200	44342800	1	0	.	44341200	44342800	0,153,0
chr10	44342800	44368600	2	0	.	44342800	44368600	255,255,51
chr10	44368600	44368800	1	0	.	44368600	44368800	0,153,0
chr10	44368800	44379600	2	0	.	44368800	44379600	255,255,51
chr10	44379600	44381600	1	0	.	44379600	44381600	0,153,0
chr10	44381600	44389200	2	0	.	44381600	44389200	255,255,51
chr10	44389200	44390000	1	0	.	44389200	44390000	0,153,0
chr10	44390000	44400000	2	0	.	44390000	44400000	255,255,51
chr10	44400000	44404400	1	0	.	44400000	44404400	0,153,0
chr10	44404400	44409600	2	0	.	44404400	44409600	255,255,51
chr10	44409600	44410400	1	0	.	44409600	44410400	0,153,0
chr10	44410400	44412200	2	0	.	44410400	44412200	255,255,51
chr10	44412200	44414000	3	0	.	44412200	44414000	255,0,0
chr10	44414000	44419800	2	0	.	44414000	44419800	255,255,51
chr10	44419800	44420000	1	0	.	44419800	44420000	0,153,0
chr10	44420000	44429000	2	0	.	44420000	44429000	255,255,51
chr10	44429000	44430400	1	0	.	44429000	44430400	0,153,0
chr10	44430400	44434400	2	0	.	44430400	44434400	255,255,51
chr10	44434400	44435600	1	0	.	44434400	44435600	0,153,0
chr10	44435600	44439600	2	0	.	44435600	44439600	255,255,51
chr10	44439600	44440000	1	0	.	44439600	44440000	0,153,0
chr10	44440000	44443600	2	0	.	44440000	44443600	255,255,51
chr10	44443600	44460600	1	0	.	44443600	44460600	0,153,0
chr10	44460600	44483000	2	0	.	44460600	44483000	255,255,51
chr10	44483000	44483400	1	0	.	44483000	44483400	0,153,0
chr10	44483400	44522600	2	0	.	44483400	44522600	255,255,51
chr10	44522600	44527200	3	0	.	44522600	44527200	255,0,0
chr10	44527200	44528400	1	0	.	44527200	44528400	0,153,0
chr10	44528400	44529000	3	0	.	44528400	44529000	255,0,0
chr10	44529000	44530800	1	0	.	44529000	44530800	0,153,0
chr10	44530800	44532000	2	0	.	44530800	44532000	255,255,51
chr10	44532000	44533000	1	0	.	44532000	44533000	0,153,0
chr10	44533000	44537000	2	0	.	44533000	44537000	255,255,51
chr10	44537000	44539800	1	0	.	44537000	44539800	0,153,0
chr10	44539800	44564800	2	0	.	44539800	44564800	255,255,51
chr10	44564800	44566400	1	0	.	44564800	44566400	0,153,0
chr10	44566400	44609000	2	0	.	44566400	44609000	255,255,51
chr10	44609000	44609600	1	0	.	44609000	44609600	0,153,0
chr10	44609600	44612400	2	0	.	44609600	44612400	255,255,51
chr10	44612400	44613000	1	0	.	44612400	44613000	0,153,0
chr10	44613000	44615000	2	0	.	44613000	44615000	255,255,51
chr10	44615000	44616200	3	0	.	44615000	44616200	255,0,0
chr10	44616200	44629800	2	0	.	44616200	44629800	255,255,51
chr10	44629800	44631400	1	0	.	44629800	44631400	0,153,0
chr10	44631400	44638000	2	0	.	44631400	44638000	255,255,51
chr10	44638000	44640200	1	0	.	44638000	44640200	0,153,0
chr10	44640200	44663200	2	0	.	44640200	44663200	255,255,51
chr10	44663200	44663800	1	0	.	44663200	44663800	0,153,0
chr10	44663800	44686400	2	0	.	44663800	44686400	255,255,51
chr10	44686400	44687400	1	0	.	44686400	44687400	0,153,0
chr10	44687400	44704200	2	0	.	44687400	44704200	255,255,51
chr10	44704200	44705200	1	0	.	44704200	44705200	0,153,0
chr10	44705200	44764400	2	0	.	44705200	44764400	255,255,51
chr10	44764400	44765400	1	0	.	44764400	44765400	0,153,0
chr10	44765400	44779400	2	0	.	44765400	44779400	255,255,51
chr10	44779400	44780400	1	0	.	44779400	44780400	0,153,0
chr10	44780400	44818200	2	0	.	44780400	44818200	255,255,51
chr10	44818200	44823000	1	0	.	44818200	44823000	0,153,0
chr10	44823000	44840400	2	0	.	44823000	44840400	255,255,51
chr10	44840400	44840800	1	0	.	44840400	44840800	0,153,0
chr10	44840800	44845200	2	0	.	44840800	44845200	255,255,51
chr10	44845200	44846600	1	0	.	44845200	44846600	0,153,0
chr10	44846600	44979000	2	0	.	44846600	44979000	255,255,51
chr10	44979000	44979600	1	0	.	44979000	44979600	0,153,0
chr10	44979600	45000600	2	0	.	44979600	45000600	255,255,51
chr10	45000600	45004000	1	0	.	45000600	45004000	0,153,0
chr10	45004000	45019200	2	0	.	45004000	45019200	255,255,51
chr10	45019200	45021000	1	0	.	45019200	45021000	0,153,0
chr10	45021000	45026800	2	0	.	45021000	45026800	255,255,51
chr10	45026800	45027600	1	0	.	45026800	45027600	0,153,0
chr10	45027600	45066000	2	0	.	45027600	45066000	255,255,51
chr10	45066000	45068600	1	0	.	45066000	45068600	0,153,0
chr10	45068600	45082600	2	0	.	45068600	45082600	255,255,51
chr10	45082600	45083000	1	0	.	45082600	45083000	0,153,0
chr10	45083000	45084800	2	0	.	45083000	45084800	255,255,51
chr10	45084800	45085800	1	0	.	45084800	45085800	0,153,0
chr10	45085800	45209200	2	0	.	45085800	45209200	255,255,51
chr10	45209200	45211600	3	0	.	45209200	45211600	255,0,0
chr10	45211600	45285000	2	0	.	45211600	45285000	255,255,51
chr10	45285000	45296000	3	0	.	45285000	45296000	255,0,0
chr10	45296000	45331200	2	0	.	45296000	45331200	255,255,51
chr10	45331200	45338800	3	0	.	45331200	45338800	255,0,0
chr10	45338800	45363200	2	0	.	45338800	45363200	255,255,51
chr10	45363200	45364200	3	0	.	45363200	45364200	255,0,0
chr10	45364200	45367600	2	0	.	45364200	45367600	255,255,51
chr10	45367600	45369400	3	0	.	45367600	45369400	255,0,0
chr10	45369400	45411200	2	0	.	45369400	45411200	255,255,51
chr10	45411200	45413600	3	0	.	45411200	45413600	255,0,0
chr10	45413600	45443000	2	0	.	45413600	45443000	255,255,51
chr10	45443000	45444200	3	0	.	45443000	45444200	255,0,0
chr10	45444200	45445600	2	0	.	45444200	45445600	255,255,51
chr10	45445600	45447800	3	0	.	45445600	45447800	255,0,0
chr10	45447800	45460000	2	0	.	45447800	45460000	255,255,51
chr10	45460000	45485600	3	0	.	45460000	45485600	255,0,0
chr10	45485600	45486600	1	0	.	45485600	45486600	0,153,0
chr10	45486600	45493000	3	0	.	45486600	45493000	255,0,0
chr10	45493000	45501600	2	0	.	45493000	45501600	255,255,51
chr10	45501600	45503200	3	0	.	45501600	45503200	255,0,0
chr10	45503200	50591400	2	0	.	45503200	50591400	255,255,51
chr10	50591400	50594200	1	0	.	50591400	50594200	0,153,0
chr10	50594200	50763000	2	0	.	50594200	50763000	255,255,51
chr10	50763000	50763800	1	0	.	50763000	50763800	0,153,0
chr10	50763800	50866000	2	0	.	50763800	50866000	255,255,51
chr10	50866000	50869000	3	0	.	50866000	50869000	255,0,0
chr10	50869000	50878000	2	0	.	50869000	50878000	255,255,51
chr10	50878000	50894200	3	0	.	50878000	50894200	255,0,0
chr10	50894200	50895000	1	0	.	50894200	50895000	0,153,0
chr10	50895000	50929000	3	0	.	50895000	50929000	255,0,0
chr10	50929000	51392200	2	0	.	50929000	51392200	255,255,51
chr10	51392200	51393200	3	0	.	51392200	51393200	255,0,0
chr10	51393200	51404800	2	0	.	51393200	51404800	255,255,51
chr10	51404800	51405600	1	0	.	51404800	51405600	0,153,0
chr10	51405600	51412800	2	0	.	51405600	51412800	255,255,51
chr10	51412800	51414200	1	0	.	51412800	51414200	0,153,0
chr10	51414200	51422400	2	0	.	51414200	51422400	255,255,51
chr10	51422400	51425200	1	0	.	51422400	51425200	0,153,0
chr10	51425200	51452200	2	0	.	51425200	51452200	255,255,51
chr10	51452200	51458400	1	0	.	51452200	51458400	0,153,0
chr10	51458400	51466600	2	0	.	51458400	51466600	255,255,51
chr10	51466600	51467600	1	0	.	51466600	51467600	0,153,0
chr10	51467600	51478800	2	0	.	51467600	51478800	255,255,51
chr10	51478800	51483600	1	0	.	51478800	51483600	0,153,0
chr10	51483600	51488400	2	0	.	51483600	51488400	255,255,51
chr10	51488400	51494000	1	0	.	51488400	51494000	0,153,0
chr10	51494000	51519200	2	0	.	51494000	51519200	255,255,51
chr10	51519200	51522200	1	0	.	51519200	51522200	0,153,0
chr10	51522200	51527600	2	0	.	51522200	51527600	255,255,51
chr10	51527600	51530200	1	0	.	51527600	51530200	0,153,0
chr10	51530200	51553200	2	0	.	51530200	51553200	255,255,51
chr10	51553200	51554200	1	0	.	51553200	51554200	0,153,0
chr10	51554200	51584600	2	0	.	51554200	51584600	255,255,51
chr10	51584600	51623400	3	0	.	51584600	51623400	255,0,0
chr10	51623400	51626600	2	0	.	51623400	51626600	255,255,51
chr10	51626600	51634600	3	0	.	51626600	51634600	255,0,0
chr10	51634600	51644200	2	0	.	51634600	51644200	255,255,51
chr10	51644200	51644800	3	0	.	51644200	51644800	255,0,0
chr10	51644800	51665600	2	0	.	51644800	51665600	255,255,51
chr10	51665600	51667400	3	0	.	51665600	51667400	255,0,0
chr10	51667400	51674800	2	0	.	51667400	51674800	255,255,51
chr10	51674800	51682800	3	0	.	51674800	51682800	255,0,0
chr10	51682800	52021800	2	0	.	51682800	52021800	255,255,51
chr10	52021800	52025000	3	0	.	52021800	52025000	255,0,0
chr10	52025000	52229000	2	0	.	52025000	52229000	255,255,51
chr10	52229000	52232600	3	0	.	52229000	52232600	255,0,0
chr10	52232600	52235000	1	0	.	52232600	52235000	0,153,0
chr10	52235000	52237800	3	0	.	52235000	52237800	255,0,0
chr10	52237800	52379600	2	0	.	52237800	52379600	255,255,51
chr10	52379600	52383600	1	0	.	52379600	52383600	0,153,0
chr10	52383600	52387000	2	0	.	52383600	52387000	255,255,51
chr10	52387000	52395400	3	0	.	52387000	52395400	255,0,0
chr10	52395400	52399000	2	0	.	52395400	52399000	255,255,51
chr10	52399000	52416800	3	0	.	52399000	52416800	255,0,0
chr10	52416800	52417000	2	0	.	52416800	52417000	255,255,51
chr10	52417000	52420800	1	0	.	52417000	52420800	0,153,0
chr10	52420800	53347200	2	0	.	52420800	53347200	255,255,51
chr10	53347200	53371000	3	0	.	53347200	53371000	255,0,0
chr10	53371000	53373800	2	0	.	53371000	53373800	255,255,51
chr10	53373800	53374800	1	0	.	53373800	53374800	0,153,0
chr10	53374800	53378400	3	0	.	53374800	53378400	255,0,0
chr10	53378400	53380600	1	0	.	53378400	53380600	0,153,0
chr10	53380600	53400600	3	0	.	53380600	53400600	255,0,0
chr10	53400600	53407200	2	0	.	53400600	53407200	255,255,51
chr10	53407200	53429200	3	0	.	53407200	53429200	255,0,0
chr10	53429200	53437600	2	0	.	53429200	53437600	255,255,51
chr10	53437600	53461000	3	0	.	53437600	53461000	255,0,0
chr10	53461000	53462000	1	0	.	53461000	53462000	0,153,0
chr10	53462000	53484800	3	0	.	53462000	53484800	255,0,0
chr10	53484800	53501200	2	0	.	53484800	53501200	255,255,51
chr10	53501200	53507200	3	0	.	53501200	53507200	255,0,0
chr10	53507200	53511000	2	0	.	53507200	53511000	255,255,51
chr10	53511000	53512200	3	0	.	53511000	53512200	255,0,0
chr10	53512200	53525600	2	0	.	53512200	53525600	255,255,51
chr10	53525600	53526000	1	0	.	53525600	53526000	0,153,0
chr10	53526000	53595600	2	0	.	53526000	53595600	255,255,51
chr10	53595600	53599400	1	0	.	53595600	53599400	0,153,0
chr10	53599400	53628600	2	0	.	53599400	53628600	255,255,51
chr10	53628600	53630600	1	0	.	53628600	53630600	0,153,0
chr10	53630600	53750200	2	0	.	53630600	53750200	255,255,51
chr10	53750200	53751400	1	0	.	53750200	53751400	0,153,0
chr10	53751400	53771000	2	0	.	53751400	53771000	255,255,51
chr10	53771000	53772800	1	0	.	53771000	53772800	0,153,0
chr10	53772800	53959600	2	0	.	53772800	53959600	255,255,51
chr10	53959600	53961000	1	0	.	53959600	53961000	0,153,0
chr10	53961000	54037000	2	0	.	53961000	54037000	255,255,51
chr10	54037000	54041600	1	0	.	54037000	54041600	0,153,0
chr10	54041600	54070600	2	0	.	54041600	54070600	255,255,51
chr10	54070600	54077800	1	0	.	54070600	54077800	0,153,0
chr10	54077800	54091800	2	0	.	54077800	54091800	255,255,51
chr10	54091800	54093600	1	0	.	54091800	54093600	0,153,0
chr10	54093600	54116800	2	0	.	54093600	54116800	255,255,51
chr10	54116800	54119800	1	0	.	54116800	54119800	0,153,0
chr10	54119800	56106800	2	0	.	54119800	56106800	255,255,51
chr10	56106800	56107600	1	0	.	56106800	56107600	0,153,0
chr10	56107600	56115000	2	0	.	56107600	56115000	255,255,51
chr10	56115000	56116200	1	0	.	56115000	56116200	0,153,0
chr10	56116200	56228000	2	0	.	56116200	56228000	255,255,51
chr10	56228000	56229600	1	0	.	56228000	56229600	0,153,0
chr10	56229600	56367400	2	0	.	56229600	56367400	255,255,51
chr10	56367400	56377200	3	0	.	56367400	56377200	255,0,0
chr10	56377200	56379000	1	0	.	56377200	56379000	0,153,0
chr10	56379000	56383600	3	0	.	56379000	56383600	255,0,0
chr10	56383600	56649000	2	0	.	56383600	56649000	255,255,51
chr10	56649000	56650600	3	0	.	56649000	56650600	255,0,0
chr10	56650600	56799200	2	0	.	56650600	56799200	255,255,51
chr10	56799200	56801200	1	0	.	56799200	56801200	0,153,0
chr10	56801200	56852000	2	0	.	56801200	56852000	255,255,51
chr10	56852000	56853400	1	0	.	56852000	56853400	0,153,0
chr10	56853400	56911200	2	0	.	56853400	56911200	255,255,51
chr10	56911200	56914000	1	0	.	56911200	56914000	0,153,0
chr10	56914000	56944600	2	0	.	56914000	56944600	255,255,51
chr10	56944600	56946000	1	0	.	56944600	56946000	0,153,0
chr10	56946000	56974000	2	0	.	56946000	56974000	255,255,51
chr10	56974000	56975000	1	0	.	56974000	56975000	0,153,0
chr10	56975000	56979400	2	0	.	56975000	56979400	255,255,51
chr10	56979400	56982000	1	0	.	56979400	56982000	0,153,0
chr10	56982000	57458800	2	0	.	56982000	57458800	255,255,51
chr10	57458800	57463600	3	0	.	57458800	57463600	255,0,0
chr10	57463600	57486000	2	0	.	57463600	57486000	255,255,51
chr10	57486000	57487800	1	0	.	57486000	57487800	0,153,0
chr10	57487800	57521800	2	0	.	57487800	57521800	255,255,51
chr10	57521800	57522200	1	0	.	57521800	57522200	0,153,0
chr10	57522200	57529600	2	0	.	57522200	57529600	255,255,51
chr10	57529600	57533200	1	0	.	57529600	57533200	0,153,0
chr10	57533200	57535200	2	0	.	57533200	57535200	255,255,51
chr10	57535200	57545600	3	0	.	57535200	57545600	255,0,0
chr10	57545600	57551200	2	0	.	57545600	57551200	255,255,51
chr10	57551200	57555800	3	0	.	57551200	57555800	255,0,0
chr10	57555800	57631000	2	0	.	57555800	57631000	255,255,51
chr10	57631000	57634400	3	0	.	57631000	57634400	255,0,0
chr10	57634400	57731200	2	0	.	57634400	57731200	255,255,51
chr10	57731200	57732200	1	0	.	57731200	57732200	0,153,0
chr10	57732200	57743400	2	0	.	57732200	57743400	255,255,51
chr10	57743400	57744000	1	0	.	57743400	57744000	0,153,0
chr10	57744000	57752200	2	0	.	57744000	57752200	255,255,51
chr10	57752200	57755800	1	0	.	57752200	57755800	0,153,0
chr10	57755800	57794400	2	0	.	57755800	57794400	255,255,51
chr10	57794400	57796600	1	0	.	57794400	57796600	0,153,0
chr10	57796600	57799000	2	0	.	57796600	57799000	255,255,51
chr10	57799000	57799800	1	0	.	57799000	57799800	0,153,0
chr10	57799800	57831400	2	0	.	57799800	57831400	255,255,51
chr10	57831400	57835000	3	0	.	57831400	57835000	255,0,0
chr10	57835000	57836400	1	0	.	57835000	57836400	0,153,0
chr10	57836400	57842400	2	0	.	57836400	57842400	255,255,51
chr10	57842400	57847200	3	0	.	57842400	57847200	255,0,0
chr10	57847200	58254600	2	0	.	57847200	58254600	255,255,51
chr10	58254600	58257000	1	0	.	58254600	58257000	0,153,0
chr10	58257000	58282200	2	0	.	58257000	58282200	255,255,51
chr10	58282200	58282600	1	0	.	58282200	58282600	0,153,0
chr10	58282600	58321600	2	0	.	58282600	58321600	255,255,51
chr10	58321600	58327800	1	0	.	58321600	58327800	0,153,0
chr10	58327800	58350600	2	0	.	58327800	58350600	255,255,51
chr10	58350600	58356000	1	0	.	58350600	58356000	0,153,0
chr10	58356000	58359200	2	0	.	58356000	58359200	255,255,51
chr10	58359200	58359800	1	0	.	58359200	58359800	0,153,0
chr10	58359800	58366800	2	0	.	58359800	58366800	255,255,51
chr10	58366800	58374400	1	0	.	58366800	58374400	0,153,0
chr10	58374400	58377000	2	0	.	58374400	58377000	255,255,51
chr10	58377000	58384600	1	0	.	58377000	58384600	0,153,0
chr10	58384600	58392000	2	0	.	58384600	58392000	255,255,51
chr10	58392000	58394200	1	0	.	58392000	58394200	0,153,0
chr10	58394200	58407800	2	0	.	58394200	58407800	255,255,51
chr10	58407800	58408800	1	0	.	58407800	58408800	0,153,0
chr10	58408800	58445200	2	0	.	58408800	58445200	255,255,51
chr10	58445200	58449400	1	0	.	58445200	58449400	0,153,0
chr10	58449400	58463600	2	0	.	58449400	58463600	255,255,51
chr10	58463600	58465000	1	0	.	58463600	58465000	0,153,0
chr10	58465000	58496800	2	0	.	58465000	58496800	255,255,51
chr10	58496800	58499600	1	0	.	58496800	58499600	0,153,0
chr10	58499600	58673400	2	0	.	58499600	58673400	255,255,51
chr10	58673400	58673600	1	0	.	58673400	58673600	0,153,0
chr10	58673600	58682600	2	0	.	58673600	58682600	255,255,51
chr10	58682600	58686200	3	0	.	58682600	58686200	255,0,0
chr10	58686200	58695400	2	0	.	58686200	58695400	255,255,51
chr10	58695400	58698800	3	0	.	58695400	58698800	255,0,0
chr10	58698800	58713800	2	0	.	58698800	58713800	255,255,51
chr10	58713800	58714800	1	0	.	58713800	58714800	0,153,0
chr10	58714800	58809600	2	0	.	58714800	58809600	255,255,51
chr10	58809600	58815400	3	0	.	58809600	58815400	255,0,0
chr10	58815400	59217200	2	0	.	58815400	59217200	255,255,51
chr10	59217200	59220400	3	0	.	59217200	59220400	255,0,0
chr10	59220400	59223000	1	0	.	59220400	59223000	0,153,0
chr10	59223000	59225600	3	0	.	59223000	59225600	255,0,0
chr10	59225600	59275200	2	0	.	59225600	59275200	255,255,51
chr10	59275200	59279600	3	0	.	59275200	59279600	255,0,0
chr10	59279600	59321400	2	0	.	59279600	59321400	255,255,51
chr10	59321400	59327600	1	0	.	59321400	59327600	0,153,0
chr10	59327600	59334200	2	0	.	59327600	59334200	255,255,51
chr10	59334200	59335800	1	0	.	59334200	59335800	0,153,0
chr10	59335800	59380200	2	0	.	59335800	59380200	255,255,51
chr10	59380200	59380600	1	0	.	59380200	59380600	0,153,0
chr10	59380600	59430200	2	0	.	59380600	59430200	255,255,51
chr10	59430200	59432000	1	0	.	59430200	59432000	0,153,0
chr10	59432000	59511600	2	0	.	59432000	59511600	255,255,51
chr10	59511600	59512200	1	0	.	59511600	59512200	0,153,0
chr10	59512200	59577800	2	0	.	59512200	59577800	255,255,51
chr10	59577800	59578800	1	0	.	59577800	59578800	0,153,0
chr10	59578800	59588400	2	0	.	59578800	59588400	255,255,51
chr10	59588400	59590400	1	0	.	59588400	59590400	0,153,0
chr10	59590400	59608000	2	0	.	59590400	59608000	255,255,51
chr10	59608000	59608600	1	0	.	59608000	59608600	0,153,0
chr10	59608600	59614600	2	0	.	59608600	59614600	255,255,51
chr10	59614600	59617200	1	0	.	59614600	59617200	0,153,0
chr10	59617200	59636400	2	0	.	59617200	59636400	255,255,51
chr10	59636400	59638000	1	0	.	59636400	59638000	0,153,0
chr10	59638000	59639400	3	0	.	59638000	59639400	255,0,0
chr10	59639400	59698600	2	0	.	59639400	59698600	255,255,51
chr10	59698600	59699200	1	0	.	59698600	59699200	0,153,0
chr10	59699200	59702200	2	0	.	59699200	59702200	255,255,51
chr10	59702200	59704200	1	0	.	59702200	59704200	0,153,0
chr10	59704200	59932400	2	0	.	59704200	59932400	255,255,51
chr10	59932400	59933200	1	0	.	59932400	59933200	0,153,0
chr10	59933200	59946200	2	0	.	59933200	59946200	255,255,51
chr10	59946200	59953800	1	0	.	59946200	59953800	0,153,0
chr10	59953800	59973600	2	0	.	59953800	59973600	255,255,51
chr10	59973600	59975600	1	0	.	59973600	59975600	0,153,0
chr10	59975600	59980400	2	0	.	59975600	59980400	255,255,51
chr10	59980400	59981600	1	0	.	59980400	59981600	0,153,0
chr10	59981600	59997600	2	0	.	59981600	59997600	255,255,51
chr10	59997600	59998000	1	0	.	59997600	59998000	0,153,0
chr10	59998000	60001400	2	0	.	59998000	60001400	255,255,51
chr10	60001400	60004200	1	0	.	60001400	60004200	0,153,0
chr10	60004200	60077800	2	0	.	60004200	60077800	255,255,51
chr10	60077800	60078200	1	0	.	60077800	60078200	0,153,0
chr10	60078200	60080000	2	0	.	60078200	60080000	255,255,51
chr10	60080000	60081600	1	0	.	60080000	60081600	0,153,0
chr10	60081600	60104200	2	0	.	60081600	60104200	255,255,51
chr10	60104200	60111400	3	0	.	60104200	60111400	255,0,0
chr10	60111400	60146000	2	0	.	60111400	60146000	255,255,51
chr10	60146000	60157200	3	0	.	60146000	60157200	255,0,0
chr10	60157200	60162600	2	0	.	60157200	60162600	255,255,51
chr10	60162600	60166600	3	0	.	60162600	60166600	255,0,0
chr10	60166600	60176000	2	0	.	60166600	60176000	255,255,51
chr10	60176000	60194800	3	0	.	60176000	60194800	255,0,0
chr10	60194800	60202800	2	0	.	60194800	60202800	255,255,51
chr10	60202800	60209800	3	0	.	60202800	60209800	255,0,0
chr10	60209800	60214800	2	0	.	60209800	60214800	255,255,51
chr10	60214800	60231400	3	0	.	60214800	60231400	255,0,0
chr10	60231400	60247400	2	0	.	60231400	60247400	255,255,51
chr10	60247400	60274000	3	0	.	60247400	60274000	255,0,0
chr10	60274000	60277400	2	0	.	60274000	60277400	255,255,51
chr10	60277400	60280600	1	0	.	60277400	60280600	0,153,0
chr10	60280600	60281800	2	0	.	60280600	60281800	255,255,51
chr10	60281800	60283000	1	0	.	60281800	60283000	0,153,0
chr10	60283000	60284000	2	0	.	60283000	60284000	255,255,51
chr10	60284000	60285200	1	0	.	60284000	60285200	0,153,0
chr10	60285200	60287400	2	0	.	60285200	60287400	255,255,51
chr10	60287400	60288200	1	0	.	60287400	60288200	0,153,0
chr10	60288200	60290000	2	0	.	60288200	60290000	255,255,51
chr10	60290000	60290800	1	0	.	60290000	60290800	0,153,0
chr10	60290800	60291600	2	0	.	60290800	60291600	255,255,51
chr10	60291600	60292600	1	0	.	60291600	60292600	0,153,0
chr10	60292600	60332000	2	0	.	60292600	60332000	255,255,51
chr10	60332000	60332600	1	0	.	60332000	60332600	0,153,0
chr10	60332600	60346000	2	0	.	60332600	60346000	255,255,51
chr10	60346000	60352600	1	0	.	60346000	60352600	0,153,0
chr10	60352600	60369600	2	0	.	60352600	60369600	255,255,51
chr10	60369600	60371400	1	0	.	60369600	60371400	0,153,0
chr10	60371400	60380400	2	0	.	60371400	60380400	255,255,51
chr10	60380400	60382400	1	0	.	60380400	60382400	0,153,0
chr10	60382400	60388800	2	0	.	60382400	60388800	255,255,51
chr10	60388800	60392200	1	0	.	60388800	60392200	0,153,0
chr10	60392200	60395600	2	0	.	60392200	60395600	255,255,51
chr10	60395600	60397000	1	0	.	60395600	60397000	0,153,0
chr10	60397000	60411400	2	0	.	60397000	60411400	255,255,51
chr10	60411400	60411600	1	0	.	60411400	60411600	0,153,0
chr10	60411600	60411800	3	0	.	60411600	60411800	255,0,0
chr10	60411800	60414000	2	0	.	60411800	60414000	255,255,51
chr10	60414000	60416400	3	0	.	60414000	60416400	255,0,0
chr10	60416400	60531400	2	0	.	60416400	60531400	255,255,51
chr10	60531400	60532000	1	0	.	60531400	60532000	0,153,0
chr10	60532000	60541600	2	0	.	60532000	60541600	255,255,51
chr10	60541600	60546600	3	0	.	60541600	60546600	255,0,0
chr10	60546600	60566400	2	0	.	60546600	60566400	255,255,51
chr10	60566400	60567200	1	0	.	60566400	60567200	0,153,0
chr10	60567200	60573400	2	0	.	60567200	60573400	255,255,51
chr10	60573400	60573800	1	0	.	60573400	60573800	0,153,0
chr10	60573800	60657800	2	0	.	60573800	60657800	255,255,51
chr10	60657800	60659200	1	0	.	60657800	60659200	0,153,0
chr10	60659200	60684000	2	0	.	60659200	60684000	255,255,51
chr10	60684000	60690800	3	0	.	60684000	60690800	255,0,0
chr10	60690800	60751800	2	0	.	60690800	60751800	255,255,51
chr10	60751800	60753000	1	0	.	60751800	60753000	0,153,0
chr10	60753000	60760400	2	0	.	60753000	60760400	255,255,51
chr10	60760400	60760800	1	0	.	60760400	60760800	0,153,0
chr10	60760800	60792000	2	0	.	60760800	60792000	255,255,51
chr10	60792000	60793600	3	0	.	60792000	60793600	255,0,0
chr10	60793600	60798200	2	0	.	60793600	60798200	255,255,51
chr10	60798200	60808200	3	0	.	60798200	60808200	255,0,0
chr10	60808200	60809200	1	0	.	60808200	60809200	0,153,0
chr10	60809200	60815800	3	0	.	60809200	60815800	255,0,0
chr10	60815800	60816200	2	0	.	60815800	60816200	255,255,51
chr10	60816200	60816600	3	0	.	60816200	60816600	255,0,0
chr10	60816600	60817400	1	0	.	60816600	60817400	0,153,0
chr10	60817400	60823400	2	0	.	60817400	60823400	255,255,51
chr10	60823400	60830000	3	0	.	60823400	60830000	255,0,0
chr10	60830000	60832400	1	0	.	60830000	60832400	0,153,0
chr10	60832400	60840400	3	0	.	60832400	60840400	255,0,0
chr10	60840400	60931800	2	0	.	60840400	60931800	255,255,51
chr10	60931800	60932200	1	0	.	60931800	60932200	0,153,0
chr10	60932200	60932400	3	0	.	60932200	60932400	255,0,0
chr10	60932400	60933400	2	0	.	60932400	60933400	255,255,51
chr10	60933400	60934600	1	0	.	60933400	60934600	0,153,0
chr10	60934600	60958000	2	0	.	60934600	60958000	255,255,51
chr10	60958000	60958400	1	0	.	60958000	60958400	0,153,0
chr10	60958400	60985000	2	0	.	60958400	60985000	255,255,51
chr10	60985000	60986400	3	0	.	60985000	60986400	255,0,0
chr10	60986400	61069200	2	0	.	60986400	61069200	255,255,51
chr10	61069200	61070800	3	0	.	61069200	61070800	255,0,0
chr10	61070800	61121000	2	0	.	61070800	61121000	255,255,51
chr10	61121000	61122000	1	0	.	61121000	61122000	0,153,0
chr10	61122000	61145200	2	0	.	61122000	61145200	255,255,51
chr10	61145200	61148200	1	0	.	61145200	61148200	0,153,0
chr10	61148200	61167000	2	0	.	61148200	61167000	255,255,51
chr10	61167000	61171400	3	0	.	61167000	61171400	255,0,0
chr10	61171400	61175800	2	0	.	61171400	61175800	255,255,51
chr10	61175800	61176200	1	0	.	61175800	61176200	0,153,0
chr10	61176200	61188200	3	0	.	61176200	61188200	255,0,0
chr10	61188200	61199600	2	0	.	61188200	61199600	255,255,51
chr10	61199600	61200200	1	0	.	61199600	61200200	0,153,0
chr10	61200200	61233200	2	0	.	61200200	61233200	255,255,51
chr10	61233200	61233600	1	0	.	61233200	61233600	0,153,0
chr10	61233600	61258200	2	0	.	61233600	61258200	255,255,51
chr10	61258200	61258400	1	0	.	61258200	61258400	0,153,0
chr10	61258400	61261000	2	0	.	61258400	61261000	255,255,51
chr10	61261000	61262200	1	0	.	61261000	61262200	0,153,0
chr10	61262200	61263000	2	0	.	61262200	61263000	255,255,51
chr10	61263000	61264600	1	0	.	61263000	61264600	0,153,0
chr10	61264600	61269800	2	0	.	61264600	61269800	255,255,51
chr10	61269800	61282400	1	0	.	61269800	61282400	0,153,0
chr10	61282400	61289800	2	0	.	61282400	61289800	255,255,51
chr10	61289800	61291200	1	0	.	61289800	61291200	0,153,0
chr10	61291200	61296600	2	0	.	61291200	61296600	255,255,51
chr10	61296600	61307000	1	0	.	61296600	61307000	0,153,0
chr10	61307000	61308000	2	0	.	61307000	61308000	255,255,51
chr10	61308000	61309000	1	0	.	61308000	61309000	0,153,0
chr10	61309000	61318400	2	0	.	61309000	61318400	255,255,51
chr10	61318400	61318800	1	0	.	61318400	61318800	0,153,0
chr10	61318800	61326000	2	0	.	61318800	61326000	255,255,51
chr10	61326000	61327200	1	0	.	61326000	61327200	0,153,0
chr10	61327200	61328200	2	0	.	61327200	61328200	255,255,51
chr10	61328200	61328600	1	0	.	61328200	61328600	0,153,0
chr10	61328600	61333600	2	0	.	61328600	61333600	255,255,51
chr10	61333600	61335200	1	0	.	61333600	61335200	0,153,0
chr10	61335200	61336200	2	0	.	61335200	61336200	255,255,51
chr10	61336200	61336600	1	0	.	61336200	61336600	0,153,0
chr10	61336600	61381400	2	0	.	61336600	61381400	255,255,51
chr10	61381400	61384000	1	0	.	61381400	61384000	0,153,0
chr10	61384000	61391800	2	0	.	61384000	61391800	255,255,51
chr10	61391800	61392200	3	0	.	61391800	61392200	255,0,0
chr10	61392200	61403800	2	0	.	61392200	61403800	255,255,51
chr10	61403800	61422600	3	0	.	61403800	61422600	255,0,0
chr10	61422600	61450800	2	0	.	61422600	61450800	255,255,51
chr10	61450800	61453200	1	0	.	61450800	61453200	0,153,0
chr10	61453200	61475000	2	0	.	61453200	61475000	255,255,51
chr10	61475000	61477400	1	0	.	61475000	61477400	0,153,0
chr10	61477400	61492200	2	0	.	61477400	61492200	255,255,51
chr10	61492200	61492600	1	0	.	61492200	61492600	0,153,0
chr10	61492600	61509200	2	0	.	61492600	61509200	255,255,51
chr10	61509200	61509400	1	0	.	61509200	61509400	0,153,0
chr10	61509400	61535000	2	0	.	61509400	61535000	255,255,51
chr10	61535000	61535400	1	0	.	61535000	61535400	0,153,0
chr10	61535400	61558400	2	0	.	61535400	61558400	255,255,51
chr10	61558400	61560200	1	0	.	61558400	61560200	0,153,0
chr10	61560200	61591800	2	0	.	61560200	61591800	255,255,51
chr10	61591800	61601800	3	0	.	61591800	61601800	255,0,0
chr10	61601800	61602400	2	0	.	61601800	61602400	255,255,51
chr10	61602400	61603000	1	0	.	61602400	61603000	0,153,0
chr10	61603000	61624800	2	0	.	61603000	61624800	255,255,51
chr10	61624800	61626400	1	0	.	61624800	61626400	0,153,0
chr10	61626400	61630400	2	0	.	61626400	61630400	255,255,51
chr10	61630400	61634000	3	0	.	61630400	61634000	255,0,0
chr10	61634000	61639000	2	0	.	61634000	61639000	255,255,51
chr10	61639000	61644000	3	0	.	61639000	61644000	255,0,0
chr10	61644000	61647800	2	0	.	61644000	61647800	255,255,51
chr10	61647800	61650000	1	0	.	61647800	61650000	0,153,0
chr10	61650000	61675800	2	0	.	61650000	61675800	255,255,51
chr10	61675800	61676600	1	0	.	61675800	61676600	0,153,0
chr10	61676600	61679400	2	0	.	61676600	61679400	255,255,51
chr10	61679400	61682600	1	0	.	61679400	61682600	0,153,0
chr10	61682600	61694800	2	0	.	61682600	61694800	255,255,51
chr10	61694800	61697600	1	0	.	61694800	61697600	0,153,0
chr10	61697600	61715000	2	0	.	61697600	61715000	255,255,51
chr10	61715000	61716200	1	0	.	61715000	61716200	0,153,0
chr10	61716200	61745800	2	0	.	61716200	61745800	255,255,51
chr10	61745800	61746400	1	0	.	61745800	61746400	0,153,0
chr10	61746400	61779800	2	0	.	61746400	61779800	255,255,51
chr10	61779800	61782800	3	0	.	61779800	61782800	255,0,0
chr10	61782800	61784200	1	0	.	61782800	61784200	0,153,0
chr10	61784200	61788000	3	0	.	61784200	61788000	255,0,0
chr10	61788000	61822200	2	0	.	61788000	61822200	255,255,51
chr10	61822200	61825800	3	0	.	61822200	61825800	255,0,0
chr10	61825800	61840600	2	0	.	61825800	61840600	255,255,51
chr10	61840600	61843200	3	0	.	61840600	61843200	255,0,0
chr10	61843200	61853000	2	0	.	61843200	61853000	255,255,51
chr10	61853000	61855400	3	0	.	61853000	61855400	255,0,0
chr10	61855400	61855800	1	0	.	61855400	61855800	0,153,0
chr10	61855800	61866800	2	0	.	61855800	61866800	255,255,51
chr10	61866800	61872400	3	0	.	61866800	61872400	255,0,0
chr10	61872400	61927600	2	0	.	61872400	61927600	255,255,51
chr10	61927600	61928800	3	0	.	61927600	61928800	255,0,0
chr10	61928800	61935200	2	0	.	61928800	61935200	255,255,51
chr10	61935200	61939600	3	0	.	61935200	61939600	255,0,0
chr10	61939600	61975400	2	0	.	61939600	61975400	255,255,51
chr10	61975400	61983200	3	0	.	61975400	61983200	255,0,0
chr10	61983200	62066000	2	0	.	61983200	62066000	255,255,51
chr10	62066000	62066600	1	0	.	62066000	62066600	0,153,0
chr10	62066600	62104800	2	0	.	62066600	62104800	255,255,51
chr10	62104800	62105400	1	0	.	62104800	62105400	0,153,0
chr10	62105400	62115000	2	0	.	62105400	62115000	255,255,51
chr10	62115000	62142000	3	0	.	62115000	62142000	255,0,0
chr10	62142000	62145200	2	0	.	62142000	62145200	255,255,51
chr10	62145200	62145600	1	0	.	62145200	62145600	0,153,0
chr10	62145600	62151400	2	0	.	62145600	62151400	255,255,51
chr10	62151400	62162600	3	0	.	62151400	62162600	255,0,0
chr10	62162600	62167800	2	0	.	62162600	62167800	255,255,51
chr10	62167800	62189600	3	0	.	62167800	62189600	255,0,0
chr10	62189600	62194800	2	0	.	62189600	62194800	255,255,51
chr10	62194800	62195600	1	0	.	62194800	62195600	0,153,0
chr10	62195600	62204400	2	0	.	62195600	62204400	255,255,51
chr10	62204400	62207800	3	0	.	62204400	62207800	255,0,0
chr10	62207800	62226800	2	0	.	62207800	62226800	255,255,51
chr10	62226800	62233600	3	0	.	62226800	62233600	255,0,0
chr10	62233600	62325800	2	0	.	62233600	62325800	255,255,51
chr10	62325800	62329800	1	0	.	62325800	62329800	0,153,0
chr10	62329800	62337600	2	0	.	62329800	62337600	255,255,51
chr10	62337600	62341800	1	0	.	62337600	62341800	0,153,0
chr10	62341800	62389600	2	0	.	62341800	62389600	255,255,51
chr10	62389600	62393200	3	0	.	62389600	62393200	255,0,0
chr10	62393200	62448400	2	0	.	62393200	62448400	255,255,51
chr10	62448400	62450400	1	0	.	62448400	62450400	0,153,0
chr10	62450400	62477000	2	0	.	62450400	62477000	255,255,51
chr10	62477000	62477600	1	0	.	62477000	62477600	0,153,0
chr10	62477600	62485000	2	0	.	62477600	62485000	255,255,51
chr10	62485000	62487800	1	0	.	62485000	62487800	0,153,0
chr10	62487800	62488400	2	0	.	62487800	62488400	255,255,51
chr10	62488400	62488600	1	0	.	62488400	62488600	0,153,0
chr10	62488600	62500200	2	0	.	62488600	62500200	255,255,51
chr10	62500200	62509600	1	0	.	62500200	62509600	0,153,0
chr10	62509600	62511400	2	0	.	62509600	62511400	255,255,51
chr10	62511400	62512200	1	0	.	62511400	62512200	0,153,0
chr10	62512200	62528800	2	0	.	62512200	62528800	255,255,51
chr10	62528800	62533000	3	0	.	62528800	62533000	255,0,0
chr10	62533000	62533400	1	0	.	62533000	62533400	0,153,0
chr10	62533400	62542600	2	0	.	62533400	62542600	255,255,51
chr10	62542600	62545000	1	0	.	62542600	62545000	0,153,0
chr10	62545000	62549800	2	0	.	62545000	62549800	255,255,51
chr10	62549800	62550200	1	0	.	62549800	62550200	0,153,0
chr10	62550200	62553400	2	0	.	62550200	62553400	255,255,51
chr10	62553400	62554400	1	0	.	62553400	62554400	0,153,0
chr10	62554400	62577200	2	0	.	62554400	62577200	255,255,51
chr10	62577200	62579000	1	0	.	62577200	62579000	0,153,0
chr10	62579000	62590200	2	0	.	62579000	62590200	255,255,51
chr10	62590200	62590600	1	0	.	62590200	62590600	0,153,0
chr10	62590600	62599800	2	0	.	62590600	62599800	255,255,51
chr10	62599800	62604000	1	0	.	62599800	62604000	0,153,0
chr10	62604000	62648400	2	0	.	62604000	62648400	255,255,51
chr10	62648400	62652400	1	0	.	62648400	62652400	0,153,0
chr10	62652400	62664800	2	0	.	62652400	62664800	255,255,51
chr10	62664800	62666400	1	0	.	62664800	62666400	0,153,0
chr10	62666400	62694400	2	0	.	62666400	62694400	255,255,51
chr10	62694400	62697200	3	0	.	62694400	62697200	255,0,0
chr10	62697200	62708600	2	0	.	62697200	62708600	255,255,51
chr10	62708600	62709600	3	0	.	62708600	62709600	255,0,0
chr10	62709600	62721800	2	0	.	62709600	62721800	255,255,51
chr10	62721800	62725600	3	0	.	62721800	62725600	255,0,0
chr10	62725600	62726800	1	0	.	62725600	62726800	0,153,0
chr10	62726800	62728800	3	0	.	62726800	62728800	255,0,0
chr10	62728800	62790600	2	0	.	62728800	62790600	255,255,51
chr10	62790600	62793400	1	0	.	62790600	62793400	0,153,0
chr10	62793400	62863800	2	0	.	62793400	62863800	255,255,51
chr10	62863800	62866200	1	0	.	62863800	62866200	0,153,0
chr10	62866200	62868000	3	0	.	62866200	62868000	255,0,0
chr10	62868000	62884600	2	0	.	62868000	62884600	255,255,51
chr10	62884600	62885800	3	0	.	62884600	62885800	255,0,0
chr10	62885800	62887200	1	0	.	62885800	62887200	0,153,0
chr10	62887200	62891200	3	0	.	62887200	62891200	255,0,0
chr10	62891200	62919600	2	0	.	62891200	62919600	255,255,51
chr10	62919600	62922200	1	0	.	62919600	62922200	0,153,0
chr10	62922200	62946600	2	0	.	62922200	62946600	255,255,51
chr10	62946600	62948400	1	0	.	62946600	62948400	0,153,0
chr10	62948400	62979800	2	0	.	62948400	62979800	255,255,51
chr10	62979800	62981200	1	0	.	62979800	62981200	0,153,0
chr10	62981200	62984000	2	0	.	62981200	62984000	255,255,51
chr10	62984000	62984800	1	0	.	62984000	62984800	0,153,0
chr10	62984800	63020600	2	0	.	62984800	63020600	255,255,51
chr10	63020600	63025400	1	0	.	63020600	63025400	0,153,0
chr10	63025400	63089000	2	0	.	63025400	63089000	255,255,51
chr10	63089000	63089400	1	0	.	63089000	63089400	0,153,0
chr10	63089400	63095800	2	0	.	63089400	63095800	255,255,51
chr10	63095800	63102600	3	0	.	63095800	63102600	255,0,0
chr10	63102600	63175000	2	0	.	63102600	63175000	255,255,51
chr10	63175000	63177600	1	0	.	63175000	63177600	0,153,0
chr10	63177600	63231400	2	0	.	63177600	63231400	255,255,51
chr10	63231400	63232000	1	0	.	63231400	63232000	0,153,0
chr10	63232000	63242600	2	0	.	63232000	63242600	255,255,51
chr10	63242600	63247600	1	0	.	63242600	63247600	0,153,0
chr10	63247600	63257400	2	0	.	63247600	63257400	255,255,51
chr10	63257400	63257800	1	0	.	63257400	63257800	0,153,0
chr10	63257800	63337200	2	0	.	63257800	63337200	255,255,51
chr10	63337200	63339800	1	0	.	63337200	63339800	0,153,0
chr10	63339800	63377600	2	0	.	63339800	63377600	255,255,51
chr10	63377600	63377800	1	0	.	63377600	63377800	0,153,0
chr10	63377800	63381400	2	0	.	63377800	63381400	255,255,51
chr10	63381400	63383000	1	0	.	63381400	63383000	0,153,0
chr10	63383000	63386200	2	0	.	63383000	63386200	255,255,51
chr10	63386200	63387400	1	0	.	63386200	63387400	0,153,0
chr10	63387400	63428200	2	0	.	63387400	63428200	255,255,51
chr10	63428200	63430800	1	0	.	63428200	63430800	0,153,0
chr10	63430800	63613600	2	0	.	63430800	63613600	255,255,51
chr10	63613600	63614600	1	0	.	63613600	63614600	0,153,0
chr10	63614600	63634000	2	0	.	63614600	63634000	255,255,51
chr10	63634000	63634400	1	0	.	63634000	63634400	0,153,0
chr10	63634400	66852800	2	0	.	63634400	66852800	255,255,51
chr10	66852800	66853800	1	0	.	66852800	66853800	0,153,0
chr10	66853800	66863600	2	0	.	66853800	66863600	255,255,51
chr10	66863600	66865200	1	0	.	66863600	66865200	0,153,0
chr10	66865200	66869800	2	0	.	66865200	66869800	255,255,51
chr10	66869800	66871400	1	0	.	66869800	66871400	0,153,0
chr10	66871400	66909200	2	0	.	66871400	66909200	255,255,51
chr10	66909200	66909600	1	0	.	66909200	66909600	0,153,0
chr10	66909600	66930600	2	0	.	66909600	66930600	255,255,51
chr10	66930600	66931000	1	0	.	66930600	66931000	0,153,0
chr10	66931000	66953200	2	0	.	66931000	66953200	255,255,51
chr10	66953200	66954400	1	0	.	66953200	66954400	0,153,0
chr10	66954400	67003800	2	0	.	66954400	67003800	255,255,51
chr10	67003800	67005600	1	0	.	67003800	67005600	0,153,0
chr10	67005600	67049000	2	0	.	67005600	67049000	255,255,51
chr10	67049000	67049600	1	0	.	67049000	67049600	0,153,0
chr10	67049600	67052400	2	0	.	67049600	67052400	255,255,51
chr10	67052400	67052600	1	0	.	67052400	67052600	0,153,0
chr10	67052600	67064800	2	0	.	67052600	67064800	255,255,51
chr10	67064800	67066000	1	0	.	67064800	67066000	0,153,0
chr10	67066000	67068600	2	0	.	67066000	67068600	255,255,51
chr10	67068600	67070000	1	0	.	67068600	67070000	0,153,0
chr10	67070000	67071400	2	0	.	67070000	67071400	255,255,51
chr10	67071400	67072600	1	0	.	67071400	67072600	0,153,0
chr10	67072600	67095800	2	0	.	67072600	67095800	255,255,51
chr10	67095800	67098800	1	0	.	67095800	67098800	0,153,0
chr10	67098800	67111400	2	0	.	67098800	67111400	255,255,51
[truncated: 90,615 more rows]

## Sheet: Ly49G2 DP NK cells 3 states
track name="DP_NK_3" description="DP_NK_3 (Emission ordered)" visibility=1 itemRgb="On"
chr10	0	3276800	2	0	.	0	3276800	255,255,51
chr10	3276800	3286200	3	0	.	3276800	3286200	255,0,0
chr10	3286200	3334600	2	0	.	3286200	3334600	255,255,51
chr10	3334600	3335000	1	0	.	3334600	3335000	0,153,0
chr10	3335000	3366200	2	0	.	3335000	3366200	255,255,51
chr10	3366200	3367400	1	0	.	3366200	3367400	0,153,0
chr10	3367400	3509800	2	0	.	3367400	3509800	255,255,51
chr10	3509800	3511800	1	0	.	3509800	3511800	0,153,0
chr10	3511800	3740600	2	0	.	3511800	3740600	255,255,51
chr10	3740600	3742400	3	0	.	3740600	3742400	255,0,0
chr10	3742400	3972200	2	0	.	3742400	3972200	255,255,51
chr10	3972200	3975200	1	0	.	3972200	3975200	0,153,0
chr10	3975200	4079400	2	0	.	3975200	4079400	255,255,51
chr10	4079400	4080400	1	0	.	4079400	4080400	0,153,0
chr10	4080400	4266600	2	0	.	4080400	4266600	255,255,51
chr10	4266600	4269400	3	0	.	4266600	4269400	255,0,0
chr10	4269400	4333400	2	0	.	4269400	4333400	255,255,51
chr10	4333400	4334800	1	0	.	4333400	4334800	0,153,0
chr10	4334800	4335200	2	0	.	4334800	4335200	255,255,51
chr10	4335200	4337400	3	0	.	4335200	4337400	255,0,0
chr10	4337400	4355600	2	0	.	4337400	4355600	255,255,51
chr10	4355600	4356200	1	0	.	4355600	4356200	0,153,0
chr10	4356200	4384800	2	0	.	4356200	4384800	255,255,51
chr10	4384800	4392600	1	0	.	4384800	4392600	0,153,0
chr10	4392600	4395400	2	0	.	4392600	4395400	255,255,51
chr10	4395400	4395800	1	0	.	4395400	4395800	0,153,0
chr10	4395800	4429400	2	0	.	4395800	4429400	255,255,51
chr10	4429400	4429600	1	0	.	4429400	4429600	0,153,0
chr10	4429600	4431200	2	0	.	4429600	4431200	255,255,51
chr10	4431200	4434000	1	0	.	4431200	4434000	0,153,0
chr10	4434000	4611400	2	0	.	4434000	4611400	255,255,51
chr10	4611400	4613400	1	0	.	4611400	4613400	0,153,0
chr10	4613400	4631600	2	0	.	4613400	4631600	255,255,51
chr10	4631600	4633400	1	0	.	4631600	4633400	0,153,0
chr10	4633400	4710400	2	0	.	4633400	4710400	255,255,51
chr10	4710400	4714200	3	0	.	4710400	4714200	255,0,0
chr10	4714200	4977000	2	0	.	4714200	4977000	255,255,51
chr10	4977000	4977800	1	0	.	4977000	4977800	0,153,0
chr10	4977800	4993000	2	0	.	4977800	4993000	255,255,51
chr10	4993000	4994400	1	0	.	4993000	4994400	0,153,0
chr10	4994400	5079600	2	0	.	4994400	5079600	255,255,51
chr10	5079600	5080600	1	0	.	5079600	5080600	0,153,0
chr10	5080600	5163600	2	0	.	5080600	5163600	255,255,51
chr10	5163600	5164600	1	0	.	5163600	5164600	0,153,0
chr10	5164600	5193000	2	0	.	5164600	5193000	255,255,51
chr10	5193000	5195400	1	0	.	5193000	5195400	0,153,0
chr10	5195400	5591000	2	0	.	5195400	5591000	255,255,51
chr10	5591000	5603000	3	0	.	5591000	5603000	255,0,0
chr10	5603000	5604200	1	0	.	5603000	5604200	0,153,0
chr10	5604200	5622200	3	0	.	5604200	5622200	255,0,0
chr10	5622200	5632600	2	0	.	5622200	5632600	255,255,51
chr10	5632600	5639200	3	0	.	5632600	5639200	255,0,0
chr10	5639200	5786800	2	0	.	5639200	5786800	255,255,51
chr10	5786800	5790200	3	0	.	5786800	5790200	255,0,0
chr10	5790200	5800600	2	0	.	5790200	5800600	255,255,51
chr10	5800600	5808600	1	0	.	5800600	5808600	0,153,0
chr10	5808600	5821400	2	0	.	5808600	5821400	255,255,51
chr10	5821400	5825400	1	0	.	5821400	5825400	0,153,0
chr10	5825400	5857000	2	0	.	5825400	5857000	255,255,51
chr10	5857000	5858400	3	0	.	5857000	5858400	255,0,0
chr10	5858400	5858600	1	0	.	5858400	5858600	0,153,0
chr10	5858600	6884800	2	0	.	5858600	6884800	255,255,51
chr10	6884800	6886200	1	0	.	6884800	6886200	0,153,0
chr10	6886200	6903200	2	0	.	6886200	6903200	255,255,51
chr10	6903200	6904400	1	0	.	6903200	6904400	0,153,0
chr10	6904400	6954400	2	0	.	6904400	6954400	255,255,51
chr10	6954400	6958400	1	0	.	6954400	6958400	0,153,0
chr10	6958400	6968200	2	0	.	6958400	6968200	255,255,51
chr10	6968200	6970000	1	0	.	6968200	6970000	0,153,0
chr10	6970000	6971000	2	0	.	6970000	6971000	255,255,51
chr10	6971000	6973200	1	0	.	6971000	6973200	0,153,0
chr10	6973200	6974000	2	0	.	6973200	6974000	255,255,51
chr10	6974000	6984400	1	0	.	6974000	6984400	0,153,0
chr10	6984400	6985200	2	0	.	6984400	6985200	255,255,51
chr10	6985200	6989600	1	0	.	6985200	6989600	0,153,0
chr10	6989600	6996600	2	0	.	6989600	6996600	255,255,51
chr10	6996600	6997600	1	0	.	6996600	6997600	0,153,0
chr10	6997600	7009200	2	0	.	6997600	7009200	255,255,51
chr10	7009200	7011000	1	0	.	7009200	7011000	0,153,0
chr10	7011000	7061800	2	0	.	7011000	7061800	255,255,51
chr10	7061800	7063600	1	0	.	7061800	7063600	0,153,0
chr10	7063600	7210000	2	0	.	7063600	7210000	255,255,51
chr10	7210000	7213000	1	0	.	7210000	7213000	0,153,0
chr10	7213000	7316000	2	0	.	7213000	7316000	255,255,51
chr10	7316000	7318600	3	0	.	7316000	7318600	255,0,0
chr10	7318600	7383800	2	0	.	7318600	7383800	255,255,51
chr10	7383800	7390400	3	0	.	7383800	7390400	255,0,0
chr10	7390400	7392800	1	0	.	7390400	7392800	0,153,0
chr10	7392800	7395800	3	0	.	7392800	7395800	255,0,0
chr10	7395800	7469400	2	0	.	7395800	7469400	255,255,51
chr10	7469400	7474600	1	0	.	7469400	7474600	0,153,0
chr10	7474600	7483400	2	0	.	7474600	7483400	255,255,51
chr10	7483400	7484800	1	0	.	7483400	7484800	0,153,0
chr10	7484800	7492000	2	0	.	7484800	7492000	255,255,51
chr10	7492000	7492800	1	0	.	7492000	7492800	0,153,0
chr10	7492800	7589200	2	0	.	7492800	7589200	255,255,51
chr10	7589200	7591200	1	0	.	7589200	7591200	0,153,0
chr10	7591200	7600600	2	0	.	7591200	7600600	255,255,51
chr10	7600600	7601000	1	0	.	7600600	7601000	0,153,0
chr10	7601000	7621800	2	0	.	7601000	7621800	255,255,51
chr10	7621800	7622200	1	0	.	7621800	7622200	0,153,0
chr10	7622200	7661200	2	0	.	7622200	7661200	255,255,51
chr10	7661200	7665200	1	0	.	7661200	7665200	0,153,0
chr10	7665200	7666600	2	0	.	7665200	7666600	255,255,51
chr10	7666600	7668600	1	0	.	7666600	7668600	0,153,0
chr10	7668600	7680000	2	0	.	7668600	7680000	255,255,51
chr10	7680000	7683200	1	0	.	7680000	7683200	0,153,0
chr10	7683200	7725600	2	0	.	7683200	7725600	255,255,51
chr10	7725600	7727800	1	0	.	7725600	7727800	0,153,0
chr10	7727800	7779800	2	0	.	7727800	7779800	255,255,51
chr10	7779800	7781600	1	0	.	7779800	7781600	0,153,0
chr10	7781600	7791600	2	0	.	7781600	7791600	255,255,51
chr10	7791600	7794200	1	0	.	7791600	7794200	0,153,0
chr10	7794200	7813800	2	0	.	7794200	7813800	255,255,51
chr10	7813800	7814600	1	0	.	7813800	7814600	0,153,0
chr10	7814600	7815800	2	0	.	7814600	7815800	255,255,51
chr10	7815800	7817200	1	0	.	7815800	7817200	0,153,0
chr10	7817200	7824600	2	0	.	7817200	7824600	255,255,51
chr10	7824600	7825000	1	0	.	7824600	7825000	0,153,0
chr10	7825000	7831800	2	0	.	7825000	7831800	255,255,51
chr10	7831800	7834200	1	0	.	7831800	7834200	0,153,0
chr10	7834200	7907000	2	0	.	7834200	7907000	255,255,51
chr10	7907000	7907600	1	0	.	7907000	7907600	0,153,0
chr10	7907600	7922800	2	0	.	7907600	7922800	255,255,51
chr10	7922800	7923800	1	0	.	7922800	7923800	0,153,0
chr10	7923800	7926400	2	0	.	7923800	7926400	255,255,51
chr10	7926400	7927600	1	0	.	7926400	7927600	0,153,0
chr10	7927600	7929200	2	0	.	7927600	7929200	255,255,51
chr10	7929200	7929400	1	0	.	7929200	7929400	0,153,0
chr10	7929400	7933000	2	0	.	7929400	7933000	255,255,51
chr10	7933000	7937600	1	0	.	7933000	7937600	0,153,0
chr10	7937600	7940200	2	0	.	7937600	7940200	255,255,51
chr10	7940200	7946400	1	0	.	7940200	7946400	0,153,0
chr10	7946400	7947200	2	0	.	7946400	7947200	255,255,51
chr10	7947200	7959600	1	0	.	7947200	7959600	0,153,0
chr10	7959600	7976400	2	0	.	7959600	7976400	255,255,51
chr10	7976400	7976800	1	0	.	7976400	7976800	0,153,0
chr10	7976800	7984000	2	0	.	7976800	7984000	255,255,51
chr10	7984000	7984600	1	0	.	7984000	7984600	0,153,0
chr10	7984600	7992600	2	0	.	7984600	7992600	255,255,51
chr10	7992600	7993200	1	0	.	7992600	7993200	0,153,0
chr10	7993200	8007000	2	0	.	7993200	8007000	255,255,51
chr10	8007000	8008000	1	0	.	8007000	8008000	0,153,0
chr10	8008000	8037000	2	0	.	8008000	8037000	255,255,51
chr10	8037000	8038400	1	0	.	8037000	8038400	0,153,0
chr10	8038400	8054600	2	0	.	8038400	8054600	255,255,51
chr10	8054600	8057200	1	0	.	8054600	8057200	0,153,0
chr10	8057200	8064800	2	0	.	8057200	8064800	255,255,51
chr10	8064800	8066600	1	0	.	8064800	8066600	0,153,0
chr10	8066600	8070000	2	0	.	8066600	8070000	255,255,51
chr10	8070000	8070800	1	0	.	8070000	8070800	0,153,0
chr10	8070800	8100000	2	0	.	8070800	8100000	255,255,51
chr10	8100000	8100400	1	0	.	8100000	8100400	0,153,0
chr10	8100400	8114200	2	0	.	8100400	8114200	255,255,51
chr10	8114200	8115000	1	0	.	8114200	8115000	0,153,0
chr10	8115000	8121800	2	0	.	8115000	8121800	255,255,51
chr10	8121800	8123400	1	0	.	8121800	8123400	0,153,0
chr10	8123400	8127200	2	0	.	8123400	8127200	255,255,51
chr10	8127200	8134600	1	0	.	8127200	8134600	0,153,0
chr10	8134600	8136400	2	0	.	8134600	8136400	255,255,51
chr10	8136400	8137000	1	0	.	8136400	8137000	0,153,0
chr10	8137000	8175200	2	0	.	8137000	8175200	255,255,51
chr10	8175200	8178000	1	0	.	8175200	8178000	0,153,0
chr10	8178000	8181600	2	0	.	8178000	8181600	255,255,51
chr10	8181600	8182000	1	0	.	8181600	8182000	0,153,0
chr10	8182000	8194600	2	0	.	8182000	8194600	255,255,51
chr10	8194600	8198600	1	0	.	8194600	8198600	0,153,0
chr10	8198600	8203800	2	0	.	8198600	8203800	255,255,51
chr10	8203800	8205200	1	0	.	8203800	8205200	0,153,0
chr10	8205200	8213800	2	0	.	8205200	8213800	255,255,51
chr10	8213800	8214800	1	0	.	8213800	8214800	0,153,0
chr10	8214800	8240200	2	0	.	8214800	8240200	255,255,51
chr10	8240200	8240800	1	0	.	8240200	8240800	0,153,0
chr10	8240800	8370000	2	0	.	8240800	8370000	255,255,51
chr10	8370000	8370400	1	0	.	8370000	8370400	0,153,0
chr10	8370400	8413000	2	0	.	8370400	8413000	255,255,51
chr10	8413000	8413800	1	0	.	8413000	8413800	0,153,0
chr10	8413800	8415000	2	0	.	8413800	8415000	255,255,51
chr10	8415000	8416600	1	0	.	8415000	8416600	0,153,0
chr10	8416600	8504800	2	0	.	8416600	8504800	255,255,51
chr10	8504800	8507800	1	0	.	8504800	8507800	0,153,0
chr10	8507800	8508200	2	0	.	8507800	8508200	255,255,51
chr10	8508200	8508400	1	0	.	8508200	8508400	0,153,0
chr10	8508400	8511000	2	0	.	8508400	8511000	255,255,51
chr10	8511000	8515200	3	0	.	8511000	8515200	255,0,0
chr10	8515200	8519800	1	0	.	8515200	8519800	0,153,0
chr10	8519800	8529400	2	0	.	8519800	8529400	255,255,51
chr10	8529400	8532600	1	0	.	8529400	8532600	0,153,0
chr10	8532600	8746200	2	0	.	8532600	8746200	255,255,51
chr10	8746200	8748200	1	0	.	8746200	8748200	0,153,0
chr10	8748200	8759000	2	0	.	8748200	8759000	255,255,51
chr10	8759000	8760800	1	0	.	8759000	8760800	0,153,0
chr10	8760800	8765800	2	0	.	8760800	8765800	255,255,51
chr10	8765800	8766600	1	0	.	8765800	8766600	0,153,0
chr10	8766600	8784600	2	0	.	8766600	8784600	255,255,51
chr10	8784600	8785000	1	0	.	8784600	8785000	0,153,0
chr10	8785000	8882400	2	0	.	8785000	8882400	255,255,51
chr10	8882400	8889400	3	0	.	8882400	8889400	255,0,0
chr10	8889400	8923000	2	0	.	8889400	8923000	255,255,51
chr10	8923000	8924600	3	0	.	8923000	8924600	255,0,0
chr10	8924600	9671400	2	0	.	8924600	9671400	255,255,51
chr10	9671400	9680800	3	0	.	9671400	9680800	255,0,0
chr10	9680800	9718400	2	0	.	9680800	9718400	255,255,51
chr10	9718400	9718600	1	0	.	9718400	9718600	0,153,0
chr10	9718600	9868600	2	0	.	9718600	9868600	255,255,51
chr10	9868600	9870400	1	0	.	9868600	9870400	0,153,0
chr10	9870400	9879800	2	0	.	9870400	9879800	255,255,51
chr10	9879800	9880800	1	0	.	9879800	9880800	0,153,0
chr10	9880800	9896600	2	0	.	9880800	9896600	255,255,51
chr10	9896600	9903000	1	0	.	9896600	9903000	0,153,0
chr10	9903000	9907200	2	0	.	9903000	9907200	255,255,51
chr10	9907200	9908000	1	0	.	9907200	9908000	0,153,0
chr10	9908000	10069600	2	0	.	9908000	10069600	255,255,51
chr10	10069600	10070800	1	0	.	10069600	10070800	0,153,0
chr10	10070800	10094000	2	0	.	10070800	10094000	255,255,51
chr10	10094000	10095400	1	0	.	10094000	10095400	0,153,0
chr10	10095400	10182000	2	0	.	10095400	10182000	255,255,51
chr10	10182000	10188000	1	0	.	10182000	10188000	0,153,0
chr10	10188000	10211000	2	0	.	10188000	10211000	255,255,51
chr10	10211000	10212200	1	0	.	10211000	10212200	0,153,0
chr10	10212200	10224400	2	0	.	10212200	10224400	255,255,51
chr10	10224400	10225000	1	0	.	10224400	10225000	0,153,0
chr10	10225000	10235600	2	0	.	10225000	10235600	255,255,51
chr10	10235600	10236000	1	0	.	10235600	10236000	0,153,0
chr10	10236000	10343800	2	0	.	10236000	10343800	255,255,51
chr10	10343800	10344600	1	0	.	10343800	10344600	0,153,0
chr10	10344600	10355400	2	0	.	10344600	10355400	255,255,51
chr10	10355400	10356000	1	0	.	10355400	10356000	0,153,0
chr10	10356000	10396000	2	0	.	10356000	10396000	255,255,51
chr10	10396000	10396600	1	0	.	10396000	10396600	0,153,0
chr10	10396600	10405800	2	0	.	10396600	10405800	255,255,51
chr10	10405800	10407200	1	0	.	10405800	10407200	0,153,0
chr10	10407200	10557200	2	0	.	10407200	10557200	255,255,51
chr10	10557200	10558600	1	0	.	10557200	10558600	0,153,0
chr10	10558600	10561400	3	0	.	10558600	10561400	255,0,0
chr10	10561400	11148800	2	0	.	10561400	11148800	255,255,51
chr10	11148800	11151400	1	0	.	11148800	11151400	0,153,0
chr10	11151400	11280000	2	0	.	11151400	11280000	255,255,51
chr10	11280000	11283800	1	0	.	11280000	11283800	0,153,0
chr10	11283800	11292600	2	0	.	11283800	11292600	255,255,51
chr10	11292600	11293600	1	0	.	11292600	11293600	0,153,0
chr10	11293600	11303600	2	0	.	11293600	11303600	255,255,51
chr10	11303600	11307200	1	0	.	11303600	11307200	0,153,0
chr10	11307200	11342800	2	0	.	11307200	11342800	255,255,51
chr10	11342800	11344600	1	0	.	11342800	11344600	0,153,0
chr10	11344600	12728400	2	0	.	11344600	12728400	255,255,51
chr10	12728400	12729800	1	0	.	12728400	12729800	0,153,0
chr10	12729800	12739800	2	0	.	12729800	12739800	255,255,51
chr10	12739800	12740400	1	0	.	12739800	12740400	0,153,0
chr10	12740400	12798600	2	0	.	12740400	12798600	255,255,51
chr10	12798600	12800000	1	0	.	12798600	12800000	0,153,0
chr10	12800000	12805800	2	0	.	12800000	12805800	255,255,51
chr10	12805800	12807200	1	0	.	12805800	12807200	0,153,0
chr10	12807200	12809600	2	0	.	12807200	12809600	255,255,51
chr10	12809600	12810000	1	0	.	12809600	12810000	0,153,0
chr10	12810000	12811400	2	0	.	12810000	12811400	255,255,51
chr10	12811400	12816200	1	0	.	12811400	12816200	0,153,0
chr10	12816200	12821400	2	0	.	12816200	12821400	255,255,51
chr10	12821400	12822000	1	0	.	12821400	12822000	0,153,0
chr10	12822000	12823400	2	0	.	12822000	12823400	255,255,51
chr10	12823400	12824200	1	0	.	12823400	12824200	0,153,0
chr10	12824200	12842600	2	0	.	12824200	12842600	255,255,51
chr10	12842600	12843200	1	0	.	12842600	12843200	0,153,0
chr10	12843200	12866800	2	0	.	12843200	12866800	255,255,51
chr10	12866800	12870000	1	0	.	12866800	12870000	0,153,0
chr10	12870000	12874200	2	0	.	12870000	12874200	255,255,51
chr10	12874200	12875400	1	0	.	12874200	12875400	0,153,0
chr10	12875400	12888400	2	0	.	12875400	12888400	255,255,51
chr10	12888400	12888800	1	0	.	12888400	12888800	0,153,0
chr10	12888800	12917200	2	0	.	12888800	12917200	255,255,51
chr10	12917200	12918800	3	0	.	12917200	12918800	255,0,0
chr10	12918800	12919800	1	0	.	12918800	12919800	0,153,0
chr10	12919800	12921400	2	0	.	12919800	12921400	255,255,51
chr10	12921400	12923800	1	0	.	12921400	12923800	0,153,0
chr10	12923800	12962000	2	0	.	12923800	12962000	255,255,51
chr10	12962000	12965000	1	0	.	12962000	12965000	0,153,0
chr10	12965000	12984800	2	0	.	12965000	12984800	255,255,51
chr10	12984800	12985400	1	0	.	12984800	12985400	0,153,0
chr10	12985400	12997000	2	0	.	12985400	12997000	255,255,51
chr10	12997000	12997400	1	0	.	12997000	12997400	0,153,0
chr10	12997400	13007800	2	0	.	12997400	13007800	255,255,51
chr10	13007800	13010000	1	0	.	13007800	13010000	0,153,0
chr10	13010000	13023000	2	0	.	13010000	13023000	255,255,51
chr10	13023000	13047800	3	0	.	13023000	13047800	255,0,0
chr10	13047800	13085800	2	0	.	13047800	13085800	255,255,51
chr10	13085800	13095400	3	0	.	13085800	13095400	255,0,0
chr10	13095400	13191800	2	0	.	13095400	13191800	255,255,51
chr10	13191800	13193600	1	0	.	13191800	13193600	0,153,0
chr10	13193600	13323400	2	0	.	13193600	13323400	255,255,51
chr10	13323400	13323800	1	0	.	13323400	13323800	0,153,0
chr10	13323800	13325800	3	0	.	13323800	13325800	255,0,0
chr10	13325800	13444000	2	0	.	13325800	13444000	255,255,51
chr10	13444000	13445400	1	0	.	13444000	13445400	0,153,0
chr10	13445400	13446400	2	0	.	13445400	13446400	255,255,51
chr10	13446400	13447000	1	0	.	13446400	13447000	0,153,0
chr10	13447000	13453000	2	0	.	13447000	13453000	255,255,51
chr10	13453000	13453800	1	0	.	13453000	13453800	0,153,0
chr10	13453800	13473400	2	0	.	13453800	13473400	255,255,51
chr10	13473400	13475200	1	0	.	13473400	13475200	0,153,0
chr10	13475200	13498000	2	0	.	13475200	13498000	255,255,51
chr10	13498000	13502800	1	0	.	13498000	13502800	0,153,0
chr10	13502800	13552200	2	0	.	13502800	13552200	255,255,51
chr10	13552200	13554400	1	0	.	13552200	13554400	0,153,0
chr10	13554400	13868200	2	0	.	13554400	13868200	255,255,51
chr10	13868200	13869600	1	0	.	13868200	13869600	0,153,0
chr10	13869600	13963600	2	0	.	13869600	13963600	255,255,51
chr10	13963600	13971800	1	0	.	13963600	13971800	0,153,0
chr10	13971800	13981600	2	0	.	13971800	13981600	255,255,51
chr10	13981600	13984800	1	0	.	13981600	13984800	0,153,0
chr10	13984800	14014000	2	0	.	13984800	14014000	255,255,51
chr10	14014000	14014600	1	0	.	14014000	14014600	0,153,0
chr10	14014600	14016400	2	0	.	14014600	14016400	255,255,51
chr10	14016400	14019400	1	0	.	14016400	14019400	0,153,0
chr10	14019400	14027000	2	0	.	14019400	14027000	255,255,51
chr10	14027000	14028200	1	0	.	14027000	14028200	0,153,0
chr10	14028200	14033800	2	0	.	14028200	14033800	255,255,51
chr10	14033800	14035600	1	0	.	14033800	14035600	0,153,0
chr10	14035600	14040200	2	0	.	14035600	14040200	255,255,51
chr10	14040200	14041200	1	0	.	14040200	14041200	0,153,0
chr10	14041200	14045000	2	0	.	14041200	14045000	255,255,51
chr10	14045000	14047400	1	0	.	14045000	14047400	0,153,0
chr10	14047400	14057200	2	0	.	14047400	14057200	255,255,51
chr10	14057200	14060000	1	0	.	14057200	14060000	0,153,0
chr10	14060000	14084800	2	0	.	14060000	14084800	255,255,51
chr10	14084800	14088200	1	0	.	14084800	14088200	0,153,0
chr10	14088200	14114400	2	0	.	14088200	14114400	255,255,51
chr10	14114400	14114600	1	0	.	14114400	14114600	0,153,0
chr10	14114600	14187000	2	0	.	14114600	14187000	255,255,51
chr10	14187000	14187800	1	0	.	14187000	14187800	0,153,0
chr10	14187800	14207600	2	0	.	14187800	14207600	255,255,51
chr10	14207600	14208000	1	0	.	14207600	14208000	0,153,0
chr10	14208000	14543400	2	0	.	14208000	14543400	255,255,51
chr10	14543400	14547200	3	0	.	14543400	14547200	255,0,0
chr10	14547200	14703200	2	0	.	14547200	14703200	255,255,51
chr10	14703200	14706000	1	0	.	14703200	14706000	0,153,0
chr10	14706000	14713000	2	0	.	14706000	14713000	255,255,51
chr10	14713000	14714400	3	0	.	14713000	14714400	255,0,0
chr10	14714400	16661400	2	0	.	14714400	16661400	255,255,51
chr10	16661400	16662000	1	0	.	16661400	16662000	0,153,0
chr10	16662000	16714000	2	0	.	16662000	16714000	255,255,51
chr10	16714000	16714800	1	0	.	16714000	16714800	0,153,0
chr10	16714800	16741600	2	0	.	16714800	16741600	255,255,51
chr10	16741600	16742600	1	0	.	16741600	16742600	0,153,0
chr10	16742600	16751200	2	0	.	16742600	16751200	255,255,51
chr10	16751200	16751800	1	0	.	16751200	16751800	0,153,0
chr10	16751800	17171400	2	0	.	16751800	17171400	255,255,51
chr10	17171400	17171800	1	0	.	17171400	17171800	0,153,0
chr10	17171800	17203600	2	0	.	17171800	17203600	255,255,51
chr10	17203600	17204600	1	0	.	17203600	17204600	0,153,0
chr10	17204600	17347000	2	0	.	17204600	17347000	255,255,51
chr10	17347000	17348200	1	0	.	17347000	17348200	0,153,0
chr10	17348200	17483400	2	0	.	17348200	17483400	255,255,51
chr10	17483400	17484200	3	0	.	17483400	17484200	255,0,0
chr10	17484200	17486400	1	0	.	17484200	17486400	0,153,0
chr10	17486400	17511600	2	0	.	17486400	17511600	255,255,51
chr10	17511600	17513600	1	0	.	17511600	17513600	0,153,0
chr10	17513600	17549000	2	0	.	17513600	17549000	255,255,51
chr10	17549000	17550600	1	0	.	17549000	17550600	0,153,0
chr10	17550600	17562800	2	0	.	17550600	17562800	255,255,51
chr10	17562800	17566600	1	0	.	17562800	17566600	0,153,0
chr10	17566600	17574800	2	0	.	17566600	17574800	255,255,51
chr10	17574800	17575600	1	0	.	17574800	17575600	0,153,0
chr10	17575600	17661200	2	0	.	17575600	17661200	255,255,51
chr10	17661200	17661400	1	0	.	17661200	17661400	0,153,0
chr10	17661400	17683400	2	0	.	17661400	17683400	255,255,51
chr10	17683400	17684400	1	0	.	17683400	17684400	0,153,0
chr10	17684400	17721200	2	0	.	17684400	17721200	255,255,51
chr10	17721200	17726000	1	0	.	17721200	17726000	0,153,0
chr10	17726000	17727800	2	0	.	17726000	17727800	255,255,51
chr10	17727800	17729400	1	0	.	17727800	17729400	0,153,0
chr10	17729400	17772000	2	0	.	17729400	17772000	255,255,51
chr10	17772000	17773000	1	0	.	17772000	17773000	0,153,0
chr10	17773000	17775000	2	0	.	17773000	17775000	255,255,51
chr10	17775000	17776000	1	0	.	17775000	17776000	0,153,0
chr10	17776000	17795600	2	0	.	17776000	17795600	255,255,51
chr10	17795600	17797200	1	0	.	17795600	17797200	0,153,0
chr10	17797200	17827200	2	0	.	17797200	17827200	255,255,51
chr10	17827200	17828800	1	0	.	17827200	17828800	0,153,0
chr10	17828800	17860800	2	0	.	17828800	17860800	255,255,51
chr10	17860800	17861400	1	0	.	17860800	17861400	0,153,0
chr10	17861400	17944400	2	0	.	17861400	17944400	255,255,51
chr10	17944400	17948800	1	0	.	17944400	17948800	0,153,0
chr10	17948800	17972600	2	0	.	17948800	17972600	255,255,51
chr10	17972600	17972800	1	0	.	17972600	17972800	0,153,0
chr10	17972800	17987400	2	0	.	17972800	17987400	255,255,51
chr10	17987400	17990200	1	0	.	17987400	17990200	0,153,0
chr10	17990200	18005600	2	0	.	17990200	18005600	255,255,51
chr10	18005600	18005800	1	0	.	18005600	18005800	0,153,0
chr10	18005800	18006400	2	0	.	18005800	18006400	255,255,51
chr10	18006400	18010600	1	0	.	18006400	18010600	0,153,0
chr10	18010600	18021000	2	0	.	18010600	18021000	255,255,51
chr10	18021000	18023800	1	0	.	18021000	18023800	0,153,0
chr10	18023800	18055000	2	0	.	18023800	18055000	255,255,51
chr10	18055000	18058600	1	0	.	18055000	18058600	0,153,0
chr10	18058600	18061200	2	0	.	18058600	18061200	255,255,51
chr10	18061200	18061800	1	0	.	18061200	18061800	0,153,0
chr10	18061800	18063800	2	0	.	18061800	18063800	255,255,51
chr10	18063800	18065400	1	0	.	18063800	18065400	0,153,0
chr10	18065400	18070800	2	0	.	18065400	18070800	255,255,51
chr10	18070800	18071400	1	0	.	18070800	18071400	0,153,0
chr10	18071400	18077800	2	0	.	18071400	18077800	255,255,51
chr10	18077800	18078000	1	0	.	18077800	18078000	0,153,0
chr10	18078000	18113000	2	0	.	18078000	18113000	255,255,51
chr10	18113000	18113400	1	0	.	18113000	18113400	0,153,0
chr10	18113400	18196200	2	0	.	18113400	18196200	255,255,51
chr10	18196200	18197800	1	0	.	18196200	18197800	0,153,0
chr10	18197800	18233200	2	0	.	18197800	18233200	255,255,51
chr10	18233200	18235800	1	0	.	18233200	18235800	0,153,0
chr10	18235800	18315600	2	0	.	18235800	18315600	255,255,51
chr10	18315600	18317800	3	0	.	18315600	18317800	255,0,0
chr10	18317800	18319600	1	0	.	18317800	18319600	0,153,0
chr10	18319600	18323000	3	0	.	18319600	18323000	255,0,0
chr10	18323000	18407200	2	0	.	18323000	18407200	255,255,51
chr10	18407200	18407800	1	0	.	18407200	18407800	0,153,0
chr10	18407800	18423800	2	0	.	18407800	18423800	255,255,51
chr10	18423800	18424200	1	0	.	18423800	18424200	0,153,0
chr10	18424200	18430000	2	0	.	18424200	18430000	255,255,51
chr10	18430000	18432200	1	0	.	18430000	18432200	0,153,0
chr10	18432200	18491800	2	0	.	18432200	18491800	255,255,51
chr10	18491800	18492600	1	0	.	18491800	18492600	0,153,0
chr10	18492600	18527200	2	0	.	18492600	18527200	255,255,51
chr10	18527200	18529000	1	0	.	18527200	18529000	0,153,0
chr10	18529000	18531000	2	0	.	18529000	18531000	255,255,51
chr10	18531000	18532600	1	0	.	18531000	18532600	0,153,0
chr10	18532600	18545000	2	0	.	18532600	18545000	255,255,51
chr10	18545000	18546400	1	0	.	18545000	18546400	0,153,0
chr10	18546400	18605400	2	0	.	18546400	18605400	255,255,51
chr10	18605400	18607400	1	0	.	18605400	18607400	0,153,0
chr10	18607400	18608600	2	0	.	18607400	18608600	255,255,51
chr10	18608600	18610000	1	0	.	18608600	18610000	0,153,0
chr10	18610000	18721600	2	0	.	18610000	18721600	255,255,51
chr10	18721600	18722000	1	0	.	18721600	18722000	0,153,0
chr10	18722000	18743200	2	0	.	18722000	18743200	255,255,51
chr10	18743200	18744200	1	0	.	18743200	18744200	0,153,0
chr10	18744200	18808400	2	0	.	18744200	18808400	255,255,51
chr10	18808400	18812200	3	0	.	18808400	18812200	255,0,0
chr10	18812200	18817000	2	0	.	18812200	18817000	255,255,51
chr10	18817000	18818000	3	0	.	18817000	18818000	255,0,0
chr10	18818000	18830200	2	0	.	18818000	18830200	255,255,51
chr10	18830200	18834400	3	0	.	18830200	18834400	255,0,0
chr10	18834400	18838400	2	0	.	18834400	18838400	255,255,51
chr10	18838400	18844800	3	0	.	18838400	18844800	255,0,0
chr10	18844800	18845600	1	0	.	18844800	18845600	0,153,0
chr10	18845600	18885200	3	0	.	18845600	18885200	255,0,0
chr10	18885200	18917000	2	0	.	18885200	18917000	255,255,51
chr10	18917000	18919200	1	0	.	18917000	18919200	0,153,0
chr10	18919200	18923200	2	0	.	18919200	18923200	255,255,51
chr10	18923200	18925000	1	0	.	18923200	18925000	0,153,0
chr10	18925000	18936000	2	0	.	18925000	18936000	255,255,51
chr10	18936000	18936800	1	0	.	18936000	18936800	0,153,0
chr10	18936800	18941600	2	0	.	18936800	18941600	255,255,51
chr10	18941600	18941800	1	0	.	18941600	18941800	0,153,0
chr10	18941800	18946800	2	0	.	18941800	18946800	255,255,51
chr10	18946800	18947400	1	0	.	18946800	18947400	0,153,0
chr10	18947400	18963800	2	0	.	18947400	18963800	255,255,51
chr10	18963800	18965800	1	0	.	18963800	18965800	0,153,0
chr10	18965800	18970400	2	0	.	18965800	18970400	255,255,51
chr10	18970400	18971400	1	0	.	18970400	18971400	0,153,0
chr10	18971400	18990800	2	0	.	18971400	18990800	255,255,51
chr10	18990800	18991400	1	0	.	18990800	18991400	0,153,0
chr10	18991400	19009200	2	0	.	18991400	19009200	255,255,51
chr10	19009200	19016400	1	0	.	19009200	19016400	0,153,0
chr10	19016400	19019400	2	0	.	19016400	19019400	255,255,51
chr10	19019400	19019800	1	0	.	19019400	19019800	0,153,0
chr10	19019800	19043000	2	0	.	19019800	19043000	255,255,51
chr10	19043000	19044400	1	0	.	19043000	19044400	0,153,0
chr10	19044400	19045800	2	0	.	19044400	19045800	255,255,51
chr10	19045800	19046600	1	0	.	19045800	19046600	0,153,0
chr10	19046600	19047400	2	0	.	19046600	19047400	255,255,51
chr10	19047400	19047800	1	0	.	19047400	19047800	0,153,0
chr10	19047800	19061000	2	0	.	19047800	19061000	255,255,51
chr10	19061000	19065600	1	0	.	19061000	19065600	0,153,0
chr10	19065600	19066800	2	0	.	19065600	19066800	255,255,51
chr10	19066800	19068800	1	0	.	19066800	19068800	0,153,0
chr10	19068800	19099000	2	0	.	19068800	19099000	255,255,51
chr10	19099000	19100000	1	0	.	19099000	19100000	0,153,0
chr10	19100000	19104000	2	0	.	19100000	19104000	255,255,51
chr10	19104000	19106200	1	0	.	19104000	19106200	0,153,0
chr10	19106200	19118400	2	0	.	19106200	19118400	255,255,51
chr10	19118400	19119400	1	0	.	19118400	19119400	0,153,0
chr10	19119400	19124400	2	0	.	19119400	19124400	255,255,51
chr10	19124400	19125200	1	0	.	19124400	19125200	0,153,0
chr10	19125200	19167400	2	0	.	19125200	19167400	255,255,51
chr10	19167400	19173400	1	0	.	19167400	19173400	0,153,0
chr10	19173400	19184200	2	0	.	19173400	19184200	255,255,51
chr10	19184200	19188800	1	0	.	19184200	19188800	0,153,0
chr10	19188800	19208600	2	0	.	19188800	19208600	255,255,51
chr10	19208600	19210600	1	0	.	19208600	19210600	0,153,0
chr10	19210600	19214400	2	0	.	19210600	19214400	255,255,51
chr10	19214400	19217400	1	0	.	19214400	19217400	0,153,0
chr10	19217400	19345200	2	0	.	19217400	19345200	255,255,51
chr10	19345200	19356200	3	0	.	19345200	19356200	255,0,0
chr10	19356200	19357200	1	0	.	19356200	19357200	0,153,0
chr10	19357200	19366600	3	0	.	19357200	19366600	255,0,0
chr10	19366600	19396000	2	0	.	19366600	19396000	255,255,51
chr10	19396000	19412600	3	0	.	19396000	19412600	255,0,0
chr10	19412600	19492600	2	0	.	19412600	19492600	255,255,51
chr10	19492600	19499000	1	0	.	19492600	19499000	0,153,0
chr10	19499000	19502600	2	0	.	19499000	19502600	255,255,51
chr10	19502600	19507600	1	0	.	19502600	19507600	0,153,0
chr10	19507600	19516200	2	0	.	19507600	19516200	255,255,51
chr10	19516200	19517600	1	0	.	19516200	19517600	0,153,0
chr10	19517600	19518600	2	0	.	19517600	19518600	255,255,51
chr10	19518600	19520200	1	0	.	19518600	19520200	0,153,0
chr10	19520200	19521800	2	0	.	19520200	19521800	255,255,51
chr10	19521800	19522600	1	0	.	19521800	19522600	0,153,0
chr10	19522600	19529800	2	0	.	19522600	19529800	255,255,51
chr10	19529800	19530000	1	0	.	19529800	19530000	0,153,0
chr10	19530000	19570200	2	0	.	19530000	19570200	255,255,51
chr10	19570200	19571600	1	0	.	19570200	19571600	0,153,0
chr10	19571600	19576200	2	0	.	19571600	19576200	255,255,51
chr10	19576200	19579600	1	0	.	19576200	19579600	0,153,0
chr10	19579600	19581800	2	0	.	19579600	19581800	255,255,51
chr10	19581800	19585200	1	0	.	19581800	19585200	0,153,0
chr10	19585200	19590800	2	0	.	19585200	19590800	255,255,51
chr10	19590800	19600800	1	0	.	19590800	19600800	0,153,0
chr10	19600800	19612600	2	0	.	19600800	19612600	255,255,51
chr10	19612600	19613800	1	0	.	19612600	19613800	0,153,0
chr10	19613800	19691800	2	0	.	19613800	19691800	255,255,51
chr10	19691800	19693400	1	0	.	19691800	19693400	0,153,0
chr10	19693400	19712400	2	0	.	19693400	19712400	255,255,51
chr10	19712400	19713200	1	0	.	19712400	19713200	0,153,0
chr10	19713200	19716800	2	0	.	19713200	19716800	255,255,51
chr10	19716800	19717000	1	0	.	19716800	19717000	0,153,0
chr10	19717000	19718400	2	0	.	19717000	19718400	255,255,51
chr10	19718400	19719400	1	0	.	19718400	19719400	0,153,0
chr10	19719400	19831000	2	0	.	19719400	19831000	255,255,51
chr10	19831000	19831400	1	0	.	19831000	19831400	0,153,0
chr10	19831400	19838800	2	0	.	19831400	19838800	255,255,51
chr10	19838800	19849800	3	0	.	19838800	19849800	255,0,0
chr10	19849800	19852000	1	0	.	19849800	19852000	0,153,0
chr10	19852000	19854200	3	0	.	19852000	19854200	255,0,0
chr10	19854200	19907000	2	0	.	19854200	19907000	255,255,51
chr10	19907000	19908000	1	0	.	19907000	19908000	0,153,0
chr10	19908000	19933200	2	0	.	19908000	19933200	255,255,51
chr10	19933200	19941600	1	0	.	19933200	19941600	0,153,0
chr10	19941600	19999400	2	0	.	19941600	19999400	255,255,51
chr10	19999400	20000200	1	0	.	19999400	20000200	0,153,0
chr10	20000200	20004800	2	0	.	20000200	20004800	255,255,51
chr10	20004800	20006200	1	0	.	20004800	20006200	0,153,0
chr10	20006200	20036200	2	0	.	20006200	20036200	255,255,51
chr10	20036200	20037600	1	0	.	20036200	20037600	0,153,0
chr10	20037600	20040200	2	0	.	20037600	20040200	255,255,51
chr10	20040200	20041600	1	0	.	20040200	20041600	0,153,0
chr10	20041600	20104400	2	0	.	20041600	20104400	255,255,51
chr10	20104400	20105000	1	0	.	20104400	20105000	0,153,0
chr10	20105000	20123400	2	0	.	20105000	20123400	255,255,51
chr10	20123400	20123800	1	0	.	20123400	20123800	0,153,0
chr10	20123800	20147600	2	0	.	20123800	20147600	255,255,51
chr10	20147600	20148800	3	0	.	20147600	20148800	255,0,0
chr10	20148800	20150400	1	0	.	20148800	20150400	0,153,0
chr10	20150400	20154200	3	0	.	20150400	20154200	255,0,0
chr10	20154200	20204800	2	0	.	20154200	20204800	255,255,51
chr10	20204800	20205200	1	0	.	20204800	20205200	0,153,0
chr10	20205200	20219400	2	0	.	20205200	20219400	255,255,51
chr10	20219400	20220000	1	0	.	20219400	20220000	0,153,0
chr10	20220000	20233400	2	0	.	20220000	20233400	255,255,51
chr10	20233400	20234000	1	0	.	20233400	20234000	0,153,0
chr10	20234000	20235600	2	0	.	20234000	20235600	255,255,51
chr10	20235600	20236200	1	0	.	20235600	20236200	0,153,0
chr10	20236200	20281200	2	0	.	20236200	20281200	255,255,51
chr10	20281200	20282600	1	0	.	20281200	20282600	0,153,0
chr10	20282600	20290400	2	0	.	20282600	20290400	255,255,51
chr10	20290400	20290800	1	0	.	20290400	20290800	0,153,0
chr10	20290800	20310800	2	0	.	20290800	20310800	255,255,51
chr10	20310800	20316400	1	0	.	20310800	20316400	0,153,0
chr10	20316400	20325800	2	0	.	20316400	20325800	255,255,51
chr10	20325800	20326800	1	0	.	20325800	20326800	0,153,0
chr10	20326800	20347000	2	0	.	20326800	20347000	255,255,51
chr10	20347000	20349200	1	0	.	20347000	20349200	0,153,0
chr10	20349200	20398000	2	0	.	20349200	20398000	255,255,51
chr10	20398000	20398800	1	0	.	20398000	20398800	0,153,0
chr10	20398800	20471600	2	0	.	20398800	20471600	255,255,51
chr10	20471600	20472600	1	0	.	20471600	20472600	0,153,0
chr10	20472600	20531800	2	0	.	20472600	20531800	255,255,51
chr10	20531800	20532200	1	0	.	20531800	20532200	0,153,0
chr10	20532200	20553600	2	0	.	20532200	20553600	255,255,51
chr10	20553600	20555200	3	0	.	20553600	20555200	255,0,0
chr10	20555200	20616400	2	0	.	20555200	20616400	255,255,51
chr10	20616400	20617200	1	0	.	20616400	20617200	0,153,0
chr10	20617200	20723000	2	0	.	20617200	20723000	255,255,51
chr10	20723000	20724400	3	0	.	20723000	20724400	255,0,0
chr10	20724400	20725600	1	0	.	20724400	20725600	0,153,0
chr10	20725600	20727200	3	0	.	20725600	20727200	255,0,0
chr10	20727200	20737000	2	0	.	20727200	20737000	255,255,51
chr10	20737000	20738200	1	0	.	20737000	20738200	0,153,0
chr10	20738200	20750400	2	0	.	20738200	20750400	255,255,51
chr10	20750400	20751000	1	0	.	20750400	20751000	0,153,0
chr10	20751000	20770000	2	0	.	20751000	20770000	255,255,51
chr10	20770000	20770400	1	0	.	20770000	20770400	0,153,0
chr10	20770400	20790800	2	0	.	20770400	20790800	255,255,51
chr10	20790800	20791400	1	0	.	20790800	20791400	0,153,0
chr10	20791400	20828400	2	0	.	20791400	20828400	255,255,51
chr10	20828400	20829000	1	0	.	20828400	20829000	0,153,0
chr10	20829000	20834400	2	0	.	20829000	20834400	255,255,51
chr10	20834400	20835600	1	0	.	20834400	20835600	0,153,0
chr10	20835600	20854600	2	0	.	20835600	20854600	255,255,51
chr10	20854600	20855800	1	0	.	20854600	20855800	0,153,0
chr10	20855800	20857400	2	0	.	20855800	20857400	255,255,51
chr10	20857400	20858000	1	0	.	20857400	20858000	0,153,0
chr10	20858000	20864400	2	0	.	20858000	20864400	255,255,51
chr10	20864400	20866200	1	0	.	20864400	20866200	0,153,0
chr10	20866200	20882000	2	0	.	20866200	20882000	255,255,51
chr10	20882000	20883400	1	0	.	20882000	20883400	0,153,0
chr10	20883400	20906200	2	0	.	20883400	20906200	255,255,51
chr10	20906200	20907600	1	0	.	20906200	20907600	0,153,0
chr10	20907600	20948400	2	0	.	20907600	20948400	255,255,51
chr10	20948400	20948800	1	0	.	20948400	20948800	0,153,0
chr10	20948800	20952000	2	0	.	20948800	20952000	255,255,51
chr10	20952000	20954800	1	0	.	20952000	20954800	0,153,0
chr10	20954800	21077000	2	0	.	20954800	21077000	255,255,51
chr10	21077000	21077800	1	0	.	21077000	21077800	0,153,0
chr10	21077800	21158200	2	0	.	21077800	21158200	255,255,51
chr10	21158200	21161800	1	0	.	21158200	21161800	0,153,0
chr10	21161800	21162800	2	0	.	21161800	21162800	255,255,51
chr10	21162800	21163000	1	0	.	21162800	21163000	0,153,0
chr10	21163000	21187200	2	0	.	21163000	21187200	255,255,51
chr10	21187200	21189400	1	0	.	21187200	21189400	0,153,0
chr10	21189400	21196400	2	0	.	21189400	21196400	255,255,51
chr10	21196400	21197200	1	0	.	21196400	21197200	0,153,0
chr10	21197200	21203800	2	0	.	21197200	21203800	255,255,51
chr10	21203800	21205800	1	0	.	21203800	21205800	0,153,0
chr10	21205800	21207400	2	0	.	21205800	21207400	255,255,51
chr10	21207400	21208000	1	0	.	21207400	21208000	0,153,0
chr10	21208000	21223600	2	0	.	21208000	21223600	255,255,51
chr10	21223600	21224400	1	0	.	21223600	21224400	0,153,0
chr10	21224400	21234800	2	0	.	21224400	21234800	255,255,51
chr10	21234800	21236000	1	0	.	21234800	21236000	0,153,0
chr10	21236000	21244800	2	0	.	21236000	21244800	255,255,51
chr10	21244800	21246000	1	0	.	21244800	21246000	0,153,0
chr10	21246000	21251600	2	0	.	21246000	21251600	255,255,51
chr10	21251600	21252600	1	0	.	21251600	21252600	0,153,0
chr10	21252600	21318400	2	0	.	21252600	21318400	255,255,51
chr10	21318400	21319600	1	0	.	21318400	21319600	0,153,0
chr10	21319600	21462400	2	0	.	21319600	21462400	255,255,51
chr10	21462400	21502200	3	0	.	21462400	21502200	255,0,0
chr10	21502200	21505600	2	0	.	21502200	21505600	255,255,51
chr10	21505600	21514400	3	0	.	21505600	21514400	255,0,0
chr10	21514400	21519200	2	0	.	21514400	21519200	255,255,51
chr10	21519200	21526600	3	0	.	21519200	21526600	255,0,0
chr10	21526600	21543600	2	0	.	21526600	21543600	255,255,51
chr10	21543600	21544800	3	0	.	21543600	21544800	255,0,0
chr10	21544800	21552000	2	0	.	21544800	21552000	255,255,51
chr10	21552000	21564600	3	0	.	21552000	21564600	255,0,0
chr10	21564600	21585600	2	0	.	21564600	21585600	255,255,51
chr10	21585600	21590200	3	0	.	21585600	21590200	255,0,0
chr10	21590200	21618600	2	0	.	21590200	21618600	255,255,51
chr10	21618600	21619400	1	0	.	21618600	21619400	0,153,0
chr10	21619400	21696600	2	0	.	21619400	21696600	255,255,51
chr10	21696600	21703400	3	0	.	21696600	21703400	255,0,0
chr10	21703400	21708400	2	0	.	21703400	21708400	255,255,51
chr10	21708400	21709200	3	0	.	21708400	21709200	255,0,0
chr10	21709200	21815800	2	0	.	21709200	21815800	255,255,51
chr10	21815800	21816800	3	0	.	21815800	21816800	255,0,0
chr10	21816800	21833000	2	0	.	21816800	21833000	255,255,51
chr10	21833000	21841200	3	0	.	21833000	21841200	255,0,0
chr10	21841200	21859200	2	0	.	21841200	21859200	255,255,51
chr10	21859200	21863400	3	0	.	21859200	21863400	255,0,0
chr10	21863400	21880800	2	0	.	21863400	21880800	255,255,51
chr10	21880800	21892000	3	0	.	21880800	21892000	255,0,0
chr10	21892000	21905600	2	0	.	21892000	21905600	255,255,51
chr10	21905600	21906400	1	0	.	21905600	21906400	0,153,0
chr10	21906400	21907200	2	0	.	21906400	21907200	255,255,51
chr10	21907200	21907600	1	0	.	21907200	21907600	0,153,0
chr10	21907600	21929400	3	0	.	21907600	21929400	255,0,0
chr10	21929400	21937000	2	0	.	21929400	21937000	255,255,51
chr10	21937000	21952600	3	0	.	21937000	21952600	255,0,0
chr10	21952600	21957000	2	0	.	21952600	21957000	255,255,51
chr10	21957000	21976400	3	0	.	21957000	21976400	255,0,0
chr10	21976400	21977000	1	0	.	21976400	21977000	0,153,0
chr10	21977000	21982400	3	0	.	21977000	21982400	255,0,0
chr10	21982400	21982800	1	0	.	21982400	21982800	0,153,0
chr10	21982800	21991400	3	0	.	21982800	21991400	255,0,0
chr10	21991400	21996200	1	0	.	21991400	21996200	0,153,0
chr10	21996200	22002400	2	0	.	21996200	22002400	255,255,51
chr10	22002400	22013800	3	0	.	22002400	22013800	255,0,0
chr10	22013800	22018400	2	0	.	22013800	22018400	255,255,51
chr10	22018400	22022000	3	0	.	22018400	22022000	255,0,0
chr10	22022000	22023000	2	0	.	22022000	22023000	255,255,51
chr10	22023000	22029000	3	0	.	22023000	22029000	255,0,0
chr10	22029000	22119600	2	0	.	22029000	22119600	255,255,51
chr10	22119600	22124000	3	0	.	22119600	22124000	255,0,0
chr10	22124000	22164400	2	0	.	22124000	22164400	255,255,51
chr10	22164400	22172000	3	0	.	22164400	22172000	255,0,0
chr10	22172000	22183000	2	0	.	22172000	22183000	255,255,51
chr10	22183000	22186600	3	0	.	22183000	22186600	255,0,0
chr10	22186600	22290400	2	0	.	22186600	22290400	255,255,51
chr10	22290400	22295400	3	0	.	22290400	22295400	255,0,0
chr10	22295400	22297600	1	0	.	22295400	22297600	0,153,0
chr10	22297600	22298800	2	0	.	22297600	22298800	255,255,51
chr10	22298800	22303400	1	0	.	22298800	22303400	0,153,0
chr10	22303400	22304200	3	0	.	22303400	22304200	255,0,0
chr10	22304200	22306000	2	0	.	22304200	22306000	255,255,51
chr10	22306000	22308000	1	0	.	22306000	22308000	0,153,0
chr10	22308000	22328400	2	0	.	22308000	22328400	255,255,51
chr10	22328400	22352000	3	0	.	22328400	22352000	255,0,0
chr10	22352000	22474200	2	0	.	22352000	22474200	255,255,51
chr10	22474200	22478600	3	0	.	22474200	22478600	255,0,0
chr10	22478600	22580200	2	0	.	22478600	22580200	255,255,51
chr10	22580200	22580600	1	0	.	22580200	22580600	0,153,0
chr10	22580600	22645000	2	0	.	22580600	22645000	255,255,51
chr10	22645000	22645200	1	0	.	22645000	22645200	0,153,0
chr10	22645200	22712200	2	0	.	22645200	22712200	255,255,51
chr10	22712200	22713600	1	0	.	22712200	22713600	0,153,0
chr10	22713600	22718400	2	0	.	22713600	22718400	255,255,51
chr10	22718400	22719200	1	0	.	22718400	22719200	0,153,0
chr10	22719200	22729600	2	0	.	22719200	22729600	255,255,51
chr10	22729600	22733000	1	0	.	22729600	22733000	0,153,0
chr10	22733000	22811000	2	0	.	22733000	22811000	255,255,51
chr10	22811000	22824600	3	0	.	22811000	22824600	255,0,0
chr10	22824600	22837400	2	0	.	22824600	22837400	255,255,51
chr10	22837400	22848400	3	0	.	22837400	22848400	255,0,0
chr10	22848400	23076800	2	0	.	22848400	23076800	255,255,51
chr10	23076800	23077800	1	0	.	23076800	23077800	0,153,0
chr10	23077800	23785200	2	0	.	23077800	23785200	255,255,51
chr10	23785200	23788800	1	0	.	23785200	23788800	0,153,0
chr10	23788800	24131400	2	0	.	23788800	24131400	255,255,51
chr10	24131400	24132200	1	0	.	24131400	24132200	0,153,0
chr10	24132200	24148800	2	0	.	24132200	24148800	255,255,51
chr10	24148800	24152600	1	0	.	24148800	24152600	0,153,0
chr10	24152600	24165800	2	0	.	24152600	24165800	255,255,51
chr10	24165800	24166000	1	0	.	24165800	24166000	0,153,0
chr10	24166000	24220600	2	0	.	24166000	24220600	255,255,51
chr10	24220600	24226200	3	0	.	24220600	24226200	255,0,0
chr10	24226200	24231800	2	0	.	24226200	24231800	255,255,51
chr10	24231800	24233400	3	0	.	24231800	24233400	255,0,0
chr10	24233400	24275600	2	0	.	24233400	24275600	255,255,51
chr10	24275600	24291600	3	0	.	24275600	24291600	255,0,0
chr10	24291600	24293000	1	0	.	24291600	24293000	0,153,0
chr10	24293000	24300600	3	0	.	24293000	24300600	255,0,0
chr10	24300600	24362600	2	0	.	24300600	24362600	255,255,51
chr10	24362600	24364400	3	0	.	24362600	24364400	255,0,0
chr10	24364400	24594000	2	0	.	24364400	24594000	255,255,51
chr10	24594000	24599400	3	0	.	24594000	24599400	255,0,0
chr10	24599400	24630600	2	0	.	24599400	24630600	255,255,51
chr10	24630600	24630800	1	0	.	24630600	24630800	0,153,0
chr10	24630800	24651200	2	0	.	24630800	24651200	255,255,51
chr10	24651200	24651400	1	0	.	24651200	24651400	0,153,0
chr10	24651400	24710600	2	0	.	24651400	24710600	255,255,51
chr10	24710600	24712800	1	0	.	24710600	24712800	0,153,0
chr10	24712800	24753400	2	0	.	24712800	24753400	255,255,51
chr10	24753400	24755200	1	0	.	24753400	24755200	0,153,0
chr10	24755200	24823600	2	0	.	24755200	24823600	255,255,51
chr10	24823600	24824200	1	0	.	24823600	24824200	0,153,0
chr10	24824200	24869400	2	0	.	24824200	24869400	255,255,51
chr10	24869400	24871200	1	0	.	24869400	24871200	0,153,0
chr10	24871200	24928000	2	0	.	24871200	24928000	255,255,51
chr10	24928000	24928400	1	0	.	24928000	24928400	0,153,0
chr10	24928400	25151200	2	0	.	24928400	25151200	255,255,51
chr10	25151200	25151600	1	0	.	25151200	25151600	0,153,0
chr10	25151600	25178400	2	0	.	25151600	25178400	255,255,51
chr10	25178400	25191600	3	0	.	25178400	25191600	255,0,0
chr10	25191600	25296200	2	0	.	25191600	25296200	255,255,51
chr10	25296200	25297800	1	0	.	25296200	25297800	0,153,0
chr10	25297800	25331400	2	0	.	25297800	25331400	255,255,51
chr10	25331400	25332400	1	0	.	25331400	25332400	0,153,0
chr10	25332400	25355200	2	0	.	25332400	25355200	255,255,51
chr10	25355200	25359400	3	0	.	25355200	25359400	255,0,0
chr10	25359400	25361400	1	0	.	25359400	25361400	0,153,0
chr10	25361400	25433000	2	0	.	25361400	25433000	255,255,51
chr10	25433000	25433400	1	0	.	25433000	25433400	0,153,0
chr10	25433400	25434200	2	0	.	25433400	25434200	255,255,51
chr10	25434200	25435000	1	0	.	25434200	25435000	0,153,0
chr10	25435000	25456200	2	0	.	25435000	25456200	255,255,51
chr10	25456200	25458000	1	0	.	25456200	25458000	0,153,0
chr10	25458000	26025800	2	0	.	25458000	26025800	255,255,51
chr10	26025800	26029000	3	0	.	26025800	26029000	255,0,0
chr10	26029000	26039600	2	0	.	26029000	26039600	255,255,51
chr10	26039600	26040600	1	0	.	26039600	26040600	0,153,0
chr10	26040600	26073000	2	0	.	26040600	26073000	255,255,51
chr10	26073000	26078200	3	0	.	26073000	26078200	255,0,0
chr10	26078200	26080000	1	0	.	26078200	26080000	0,153,0
chr10	26080000	26084200	3	0	.	26080000	26084200	255,0,0
chr10	26084200	26202800	2	0	.	26084200	26202800	255,255,51
chr10	26202800	26203600	1	0	.	26202800	26203600	0,153,0
chr10	26203600	26227200	2	0	.	26203600	26227200	255,255,51
chr10	26227200	26235800	1	0	.	26227200	26235800	0,153,0
chr10	26235800	26236800	2	0	.	26235800	26236800	255,255,51
chr10	26236800	26237200	1	0	.	26236800	26237200	0,153,0
chr10	26237200	26322000	2	0	.	26237200	26322000	255,255,51
chr10	26322000	26323800	1	0	.	26322000	26323800	0,153,0
chr10	26323800	26325000	2	0	.	26323800	26325000	255,255,51
chr10	26325000	26326400	1	0	.	26325000	26326400	0,153,0
chr10	26326400	26334800	2	0	.	26326400	26334800	255,255,51
chr10	26334800	26335000	1	0	.	26334800	26335000	0,153,0
chr10	26335000	26364200	2	0	.	26335000	26364200	255,255,51
chr10	26364200	26365000	1	0	.	26364200	26365000	0,153,0
chr10	26365000	26372600	2	0	.	26365000	26372600	255,255,51
chr10	26372600	26377000	1	0	.	26372600	26377000	0,153,0
chr10	26377000	26494200	2	0	.	26377000	26494200	255,255,51
chr10	26494200	26494400	1	0	.	26494200	26494400	0,153,0
chr10	26494400	26520800	2	0	.	26494400	26520800	255,255,51
chr10	26520800	26521400	1	0	.	26520800	26521400	0,153,0
chr10	26521400	26691400	2	0	.	26521400	26691400	255,255,51
chr10	26691400	26698200	3	0	.	26691400	26698200	255,0,0
chr10	26698200	26772000	2	0	.	26698200	26772000	255,255,51
chr10	26772000	26775600	1	0	.	26772000	26775600	0,153,0
chr10	26775600	26779600	2	0	.	26775600	26779600	255,255,51
chr10	26779600	26782600	1	0	.	26779600	26782600	0,153,0
chr10	26782600	26784400	2	0	.	26782600	26784400	255,255,51
chr10	26784400	26785600	1	0	.	26784400	26785600	0,153,0
chr10	26785600	26789400	2	0	.	26785600	26789400	255,255,51
chr10	26789400	26792800	1	0	.	26789400	26792800	0,153,0
chr10	26792800	26797200	2	0	.	26792800	26797200	255,255,51
chr10	26797200	26801600	1	0	.	26797200	26801600	0,153,0
chr10	26801600	26806600	2	0	.	26801600	26806600	255,255,51
chr10	26806600	26807000	1	0	.	26806600	26807000	0,153,0
chr10	26807000	26828200	2	0	.	26807000	26828200	255,255,51
chr10	26828200	26829000	1	0	.	26828200	26829000	0,153,0
chr10	26829000	28070200	2	0	.	26829000	28070200	255,255,51
chr10	28070200	28074000	3	0	.	28070200	28074000	255,0,0
chr10	28074000	28076600	1	0	.	28074000	28076600	0,153,0
chr10	28076600	28516000	2	0	.	28076600	28516000	255,255,51
chr10	28516000	28516800	1	0	.	28516000	28516800	0,153,0
chr10	28516800	28518000	2	0	.	28516800	28518000	255,255,51
chr10	28518000	28518600	1	0	.	28518000	28518600	0,153,0
chr10	28518600	28583400	2	0	.	28518600	28583400	255,255,51
chr10	28583400	28594000	3	0	.	28583400	28594000	255,0,0
chr10	28594000	28595000	1	0	.	28594000	28595000	0,153,0
chr10	28595000	28601600	3	0	.	28595000	28601600	255,0,0
chr10	28601600	28607000	2	0	.	28601600	28607000	255,255,51
chr10	28607000	28610200	3	0	.	28607000	28610200	255,0,0
chr10	28610200	29143800	2	0	.	28610200	29143800	255,255,51
chr10	29143800	29145400	3	0	.	29143800	29145400	255,0,0
chr10	29145400	29311800	2	0	.	29145400	29311800	255,255,51
chr10	29311800	29315600	1	0	.	29311800	29315600	0,153,0
chr10	29315600	29359600	2	0	.	29315600	29359600	255,255,51
chr10	29359600	29363000	1	0	.	29359600	29363000	0,153,0
chr10	29363000	29531400	2	0	.	29363000	29531400	255,255,51
chr10	29531400	29536200	3	0	.	29531400	29536200	255,0,0
chr10	29536200	30198200	2	0	.	29536200	30198200	255,255,51
chr10	30198200	30201200	1	0	.	30198200	30201200	0,153,0
chr10	30201200	30599400	2	0	.	30201200	30599400	255,255,51
chr10	30599400	30601400	1	0	.	30599400	30601400	0,153,0
chr10	30601400	30616600	2	0	.	30601400	30616600	255,255,51
chr10	30616600	30619200	1	0	.	30616600	30619200	0,153,0
chr10	30619200	30623000	2	0	.	30619200	30623000	255,255,51
chr10	30623000	30623400	1	0	.	30623000	30623400	0,153,0
chr10	30623400	30654200	2	0	.	30623400	30654200	255,255,51
chr10	30654200	30656200	1	0	.	30654200	30656200	0,153,0
chr10	30656200	30679400	2	0	.	30656200	30679400	255,255,51
chr10	30679400	30680000	1	0	.	30679400	30680000	0,153,0
chr10	30680000	30712600	2	0	.	30680000	30712600	255,255,51
chr10	30712600	30713000	1	0	.	30712600	30713000	0,153,0
chr10	30713000	30715600	2	0	.	30713000	30715600	255,255,51
chr10	30715600	30716800	1	0	.	30715600	30716800	0,153,0
chr10	30716800	30801600	2	0	.	30716800	30801600	255,255,51
chr10	30801600	30804200	1	0	.	30801600	30804200	0,153,0
chr10	30804200	30810600	2	0	.	30804200	30810600	255,255,51
chr10	30810600	30812000	1	0	.	30810600	30812000	0,153,0
chr10	30812000	30813200	3	0	.	30812000	30813200	255,0,0
chr10	30813200	30837400	2	0	.	30813200	30837400	255,255,51
chr10	30837400	30842000	3	0	.	30837400	30842000	255,0,0
chr10	30842000	30844000	1	0	.	30842000	30844000	0,153,0
chr10	30844000	30850400	3	0	.	30844000	30850400	255,0,0
chr10	30850400	31313000	2	0	.	30850400	31313000	255,255,51
chr10	31313000	31314600	1	0	.	31313000	31314600	0,153,0
chr10	31314600	31606400	2	0	.	31314600	31606400	255,255,51
chr10	31606400	31610200	1	0	.	31606400	31610200	0,153,0
chr10	31610200	33949600	2	0	.	31610200	33949600	255,255,51
chr10	33949600	33952000	1	0	.	33949600	33952000	0,153,0
chr10	33952000	34017800	2	0	.	33952000	34017800	255,255,51
chr10	34017800	34021200	1	0	.	34017800	34021200	0,153,0
chr10	34021200	34030400	2	0	.	34021200	34030400	255,255,51
chr10	34030400	34031400	1	0	.	34030400	34031400	0,153,0
chr10	34031400	34089200	2	0	.	34031400	34089200	255,255,51
chr10	34089200	34090000	1	0	.	34089200	34090000	0,153,0
chr10	34090000	34095200	2	0	.	34090000	34095200	255,255,51
chr10	34095200	34097000	1	0	.	34095200	34097000	0,153,0
chr10	34097000	34109800	2	0	.	34097000	34109800	255,255,51
chr10	34109800	34113000	1	0	.	34109800	34113000	0,153,0
chr10	34113000	34117200	2	0	.	34113000	34117200	255,255,51
chr10	34117200	34118600	1	0	.	34117200	34118600	0,153,0
chr10	34118600	34126600	2	0	.	34118600	34126600	255,255,51
chr10	34126600	34128400	1	0	.	34126600	34128400	0,153,0
chr10	34128400	34170000	2	0	.	34128400	34170000	255,255,51
chr10	34170000	34174400	1	0	.	34170000	34174400	0,153,0
chr10	34174400	34176000	2	0	.	34174400	34176000	255,255,51
chr10	34176000	34177000	1	0	.	34176000	34177000	0,153,0
chr10	34177000	34179200	3	0	.	34177000	34179200	255,0,0
chr10	34179200	34186000	2	0	.	34179200	34186000	255,255,51
chr10	34186000	34186200	1	0	.	34186000	34186200	0,153,0
chr10	34186200	34186800	2	0	.	34186200	34186800	255,255,51
chr10	34186800	34187600	1	0	.	34186800	34187600	0,153,0
chr10	34187600	34189000	3	0	.	34187600	34189000	255,0,0
chr10	34189000	34190400	2	0	.	34189000	34190400	255,255,51
chr10	34190400	34191000	1	0	.	34190400	34191000	0,153,0
chr10	34191000	34196800	2	0	.	34191000	34196800	255,255,51
chr10	34196800	34198600	1	0	.	34196800	34198600	0,153,0
chr10	34198600	34205000	2	0	.	34198600	34205000	255,255,51
chr10	34205000	34208200	1	0	.	34205000	34208200	0,153,0
chr10	34208200	34235400	2	0	.	34208200	34235400	255,255,51
chr10	34235400	34235800	1	0	.	34235400	34235800	0,153,0
chr10	34235800	34273800	2	0	.	34235800	34273800	255,255,51
chr10	34273800	34278400	3	0	.	34273800	34278400	255,0,0
chr10	34278400	34280600	2	0	.	34278400	34280600	255,255,51
chr10	34280600	34286600	1	0	.	34280600	34286600	0,153,0
chr10	34286600	34296600	2	0	.	34286600	34296600	255,255,51
chr10	34296600	34299400	1	0	.	34296600	34299400	0,153,0
chr10	34299400	34332800	2	0	.	34299400	34332800	255,255,51
chr10	34332800	34333400	3	0	.	34332800	34333400	255,0,0
chr10	34333400	34341000	2	0	.	34333400	34341000	255,255,51
chr10	34341000	34341600	3	0	.	34341000	34341600	255,0,0
chr10	34341600	34342000	1	0	.	34341600	34342000	0,153,0
chr10	34342000	34346000	3	0	.	34342000	34346000	255,0,0
chr10	34346000	34416000	2	0	.	34346000	34416000	255,255,51
chr10	34416000	34419000	1	0	.	34416000	34419000	0,153,0
chr10	34419000	36973800	2	0	.	34419000	36973800	255,255,51
chr10	36973800	36977000	1	0	.	36973800	36977000	0,153,0
chr10	36977000	37134200	2	0	.	36977000	37134200	255,255,51
chr10	37134200	37135800	3	0	.	37134200	37135800	255,0,0
chr10	37135800	37141800	1	0	.	37135800	37141800	0,153,0
chr10	37141800	37142400	3	0	.	37141800	37142400	255,0,0
chr10	37142400	37193000	2	0	.	37142400	37193000	255,255,51
chr10	37193000	37193400	1	0	.	37193000	37193400	0,153,0
chr10	37193400	37236000	2	0	.	37193400	37236000	255,255,51
chr10	37236000	37237200	1	0	.	37236000	37237200	0,153,0
chr10	37237200	37336800	2	0	.	37237200	37336800	255,255,51
chr10	37336800	37338600	1	0	.	37336800	37338600	0,153,0
chr10	37338600	37381400	2	0	.	37338600	37381400	255,255,51
chr10	37381400	37382400	1	0	.	37381400	37382400	0,153,0
chr10	37382400	37792400	2	0	.	37382400	37792400	255,255,51
chr10	37792400	37792800	3	0	.	37792400	37792800	255,0,0
chr10	37792800	38884200	2	0	.	37792800	38884200	255,255,51
chr10	38884200	38885800	1	0	.	38884200	38885800	0,153,0
chr10	38885800	39023200	2	0	.	38885800	39023200	255,255,51
chr10	39023200	39025000	1	0	.	39023200	39025000	0,153,0
chr10	39025000	39133600	2	0	.	39025000	39133600	255,255,51
chr10	39133600	39135200	1	0	.	39133600	39135200	0,153,0
chr10	39135200	39170200	2	0	.	39135200	39170200	255,255,51
chr10	39170200	39172200	1	0	.	39170200	39172200	0,153,0
chr10	39172200	39192400	2	0	.	39172200	39192400	255,255,51
chr10	39192400	39193600	1	0	.	39192400	39193600	0,153,0
chr10	39193600	39223600	2	0	.	39193600	39223600	255,255,51
chr10	39223600	39224200	1	0	.	39223600	39224200	0,153,0
chr10	39224200	39239800	2	0	.	39224200	39239800	255,255,51
chr10	39239800	39242200	1	0	.	39239800	39242200	0,153,0
chr10	39242200	39249400	2	0	.	39242200	39249400	255,255,51
chr10	39249400	39250200	1	0	.	39249400	39250200	0,153,0
chr10	39250200	39266000	2	0	.	39250200	39266000	255,255,51
chr10	39266000	39267400	1	0	.	39266000	39267400	0,153,0
chr10	39267400	39280400	2	0	.	39267400	39280400	255,255,51
chr10	39280400	39280800	1	0	.	39280400	39280800	0,153,0
chr10	39280800	39311400	2	0	.	39280800	39311400	255,255,51
chr10	39311400	39311800	1	0	.	39311400	39311800	0,153,0
chr10	39311800	39314600	2	0	.	39311800	39314600	255,255,51
chr10	39314600	39315800	1	0	.	39314600	39315800	0,153,0
chr10	39315800	39338200	2	0	.	39315800	39338200	255,255,51
chr10	39338200	39340400	1	0	.	39338200	39340400	0,153,0
chr10	39340400	39367600	2	0	.	39340400	39367600	255,255,51
chr10	39367600	39374400	1	0	.	39367600	39374400	0,153,0
chr10	39374400	39375400	2	0	.	39374400	39375400	255,255,51
chr10	39375400	39377000	1	0	.	39375400	39377000	0,153,0
chr10	39377000	39386400	2	0	.	39377000	39386400	255,255,51
chr10	39386400	39388600	1	0	.	39386400	39388600	0,153,0
chr10	39388600	39390200	2	0	.	39388600	39390200	255,255,51
chr10	39390200	39391200	1	0	.	39390200	39391200	0,153,0
chr10	39391200	39392600	2	0	.	39391200	39392600	255,255,51
chr10	39392600	39393000	1	0	.	39392600	39393000	0,153,0
chr10	39393000	39401800	2	0	.	39393000	39401800	255,255,51
chr10	39401800	39403200	1	0	.	39401800	39403200	0,153,0
chr10	39403200	39412600	2	0	.	39403200	39412600	255,255,51
chr10	39412600	39416000	1	0	.	39412600	39416000	0,153,0
chr10	39416000	39420400	2	0	.	39416000	39420400	255,255,51
chr10	39420400	39421800	1	0	.	39420400	39421800	0,153,0
chr10	39421800	39434200	2	0	.	39421800	39434200	255,255,51
chr10	39434200	39437000	1	0	.	39434200	39437000	0,153,0
chr10	39437000	39455400	2	0	.	39437000	39455400	255,255,51
chr10	39455400	39457200	1	0	.	39455400	39457200	0,153,0
chr10	39457200	39458600	2	0	.	39457200	39458600	255,255,51
chr10	39458600	39459200	1	0	.	39458600	39459200	0,153,0
chr10	39459200	39468800	2	0	.	39459200	39468800	255,255,51
chr10	39468800	39472800	1	0	.	39468800	39472800	0,153,0
chr10	39472800	39478400	2	0	.	39472800	39478400	255,255,51
chr10	39478400	39480600	1	0	.	39478400	39480600	0,153,0
chr10	39480600	39484000	2	0	.	39480600	39484000	255,255,51
chr10	39484000	39489000	1	0	.	39484000	39489000	0,153,0
chr10	39489000	39514000	2	0	.	39489000	39514000	255,255,51
chr10	39514000	39515200	1	0	.	39514000	39515200	0,153,0
chr10	39515200	39519400	2	0	.	39515200	39519400	255,255,51
chr10	39519400	39523200	1	0	.	39519400	39523200	0,153,0
chr10	39523200	39600000	2	0	.	39523200	39600000	255,255,51
chr10	39600000	39601400	1	0	.	39600000	39601400	0,153,0
chr10	39601400	39612200	2	0	.	39601400	39612200	255,255,51
chr10	39612200	39615600	1	0	.	39612200	39615600	0,153,0
chr10	39615600	39624600	2	0	.	39615600	39624600	255,255,51
chr10	39624600	39626000	1	0	.	39624600	39626000	0,153,0
chr10	39626000	39665800	2	0	.	39626000	39665800	255,255,51
chr10	39665800	39667000	1	0	.	39665800	39667000	0,153,0
chr10	39667000	39690600	2	0	.	39667000	39690600	255,255,51
chr10	39690600	39691200	1	0	.	39690600	39691200	0,153,0
chr10	39691200	39730200	2	0	.	39691200	39730200	255,255,51
chr10	39730200	39734800	1	0	.	39730200	39734800	0,153,0
chr10	39734800	39771200	2	0	.	39734800	39771200	255,255,51
chr10	39771200	39772000	1	0	.	39771200	39772000	0,153,0
chr10	39772000	39774400	2	0	.	39772000	39774400	255,255,51
chr10	39774400	39775000	1	0	.	39774400	39775000	0,153,0
chr10	39775000	39792800	2	0	.	39775000	39792800	255,255,51
chr10	39792800	39794000	1	0	.	39792800	39794000	0,153,0
chr10	39794000	39815200	2	0	.	39794000	39815200	255,255,51
chr10	39815200	39815400	1	0	.	39815200	39815400	0,153,0
chr10	39815400	39897600	2	0	.	39815400	39897600	255,255,51
chr10	39897600	39899400	1	0	.	39897600	39899400	0,153,0
chr10	39899400	39908800	2	0	.	39899400	39908800	255,255,51
chr10	39908800	39909600	1	0	.	39908800	39909600	0,153,0
chr10	39909600	39927200	2	0	.	39909600	39927200	255,255,51
chr10	39927200	39929400	3	0	.	39927200	39929400	255,0,0
chr10	39929400	39959400	2	0	.	39929400	39959400	255,255,51
chr10	39959400	39960400	1	0	.	39959400	39960400	0,153,0
chr10	39960400	39974800	2	0	.	39960400	39974800	255,255,51
chr10	39974800	39975600	1	0	.	39974800	39975600	0,153,0
chr10	39975600	40022600	2	0	.	39975600	40022600	255,255,51
chr10	40022600	40024600	3	0	.	40022600	40024600	255,0,0
chr10	40024600	40025600	1	0	.	40024600	40025600	0,153,0
chr10	40025600	40070400	2	0	.	40025600	40070400	255,255,51
chr10	40070400	40071200	1	0	.	40070400	40071200	0,153,0
chr10	40071200	40090200	2	0	.	40071200	40090200	255,255,51
chr10	40090200	40090400	1	0	.	40090200	40090400	0,153,0
chr10	40090400	40128400	2	0	.	40090400	40128400	255,255,51
chr10	40128400	40129000	1	0	.	40128400	40129000	0,153,0
chr10	40129000	40139600	2	0	.	40129000	40139600	255,255,51
chr10	40139600	40142600	1	0	.	40139600	40142600	0,153,0
chr10	40142600	40163000	2	0	.	40142600	40163000	255,255,51
chr10	40163000	40166600	1	0	.	40163000	40166600	0,153,0
chr10	40166600	40171200	2	0	.	40166600	40171200	255,255,51
chr10	40171200	40171600	1	0	.	40171200	40171600	0,153,0
chr10	40171600	40191000	2	0	.	40171600	40191000	255,255,51
chr10	40191000	40192000	1	0	.	40191000	40192000	0,153,0
chr10	40192000	40231800	2	0	.	40192000	40231800	255,255,51
chr10	40231800	40233400	1	0	.	40231800	40233400	0,153,0
chr10	40233400	40245800	2	0	.	40233400	40245800	255,255,51
chr10	40245800	40247600	1	0	.	40245800	40247600	0,153,0
chr10	40247600	40256400	2	0	.	40247600	40256400	255,255,51
chr10	40256400	40259600	1	0	.	40256400	40259600	0,153,0
chr10	40259600	40298000	2	0	.	40259600	40298000	255,255,51
chr10	40298000	40303200	1	0	.	40298000	40303200	0,153,0
chr10	40303200	40309800	2	0	.	40303200	40309800	255,255,51
chr10	40309800	40310800	1	0	.	40309800	40310800	0,153,0
chr10	40310800	40347200	2	0	.	40310800	40347200	255,255,51
chr10	40347200	40351200	1	0	.	40347200	40351200	0,153,0
chr10	40351200	40352200	2	0	.	40351200	40352200	255,255,51
chr10	40352200	40355400	1	0	.	40352200	40355400	0,153,0
chr10	40355400	40356200	2	0	.	40355400	40356200	255,255,51
chr10	40356200	40357000	1	0	.	40356200	40357000	0,153,0
chr10	40357000	40370800	2	0	.	40357000	40370800	255,255,51
chr10	40370800	40373000	1	0	.	40370800	40373000	0,153,0
chr10	40373000	40380200	2	0	.	40373000	40380200	255,255,51
chr10	40380200	40383200	1	0	.	40380200	40383200	0,153,0
chr10	40383200	40384800	2	0	.	40383200	40384800	255,255,51
chr10	40384800	40387400	1	0	.	40384800	40387400	0,153,0
chr10	40387400	40447400	2	0	.	40387400	40447400	255,255,51
chr10	40447400	40448800	1	0	.	40447400	40448800	0,153,0
chr10	40448800	40449600	2	0	.	40448800	40449600	255,255,51
chr10	40449600	40450000	1	0	.	40449600	40450000	0,153,0
chr10	40450000	40451600	2	0	.	40450000	40451600	255,255,51
chr10	40451600	40452400	1	0	.	40451600	40452400	0,153,0
chr10	40452400	40462200	2	0	.	40452400	40462200	255,255,51
chr10	40462200	40462600	1	0	.	40462200	40462600	0,153,0
chr10	40462600	40489200	2	0	.	40462600	40489200	255,255,51
chr10	40489200	40489600	1	0	.	40489200	40489600	0,153,0
chr10	40489600	40525000	2	0	.	40489600	40525000	255,255,51
chr10	40525000	40525400	1	0	.	40525000	40525400	0,153,0
chr10	40525400	40527600	2	0	.	40525400	40527600	255,255,51
chr10	40527600	40528200	1	0	.	40527600	40528200	0,153,0
chr10	40528200	40529600	2	0	.	40528200	40529600	255,255,51
chr10	40529600	40530000	1	0	.	40529600	40530000	0,153,0
chr10	40530000	40576400	2	0	.	40530000	40576400	255,255,51
chr10	40576400	40577000	1	0	.	40576400	40577000	0,153,0
chr10	40577000	40612600	2	0	.	40577000	40612600	255,255,51
chr10	40612600	40616200	3	0	.	40612600	40616200	255,0,0
chr10	40616200	40677000	2	0	.	40616200	40677000	255,255,51
chr10	40677000	40686000	3	0	.	40677000	40686000	255,0,0
chr10	40686000	40694000	2	0	.	40686000	40694000	255,255,51
chr10	40694000	40695800	3	0	.	40694000	40695800	255,0,0
chr10	40695800	40706800	2	0	.	40695800	40706800	255,255,51
chr10	40706800	40708600	3	0	.	40706800	40708600	255,0,0
chr10	40708600	40725600	2	0	.	40708600	40725600	255,255,51
chr10	40725600	40732200	3	0	.	40725600	40732200	255,0,0
chr10	40732200	40802600	2	0	.	40732200	40802600	255,255,51
chr10	40802600	40804200	3	0	.	40802600	40804200	255,0,0
chr10	40804200	40881400	2	0	.	40804200	40881400	255,255,51
chr10	40881400	40885200	1	0	.	40881400	40885200	0,153,0
chr10	40885200	40893200	3	0	.	40885200	40893200	255,0,0
chr10	40893200	40901800	2	0	.	40893200	40901800	255,255,51
chr10	40901800	40905800	3	0	.	40901800	40905800	255,0,0
chr10	40905800	40969200	2	0	.	40905800	40969200	255,255,51
chr10	40969200	40973600	3	0	.	40969200	40973600	255,0,0
chr10	40973600	41301600	2	0	.	40973600	41301600	255,255,51
chr10	41301600	41305000	1	0	.	41301600	41305000	0,153,0
chr10	41305000	41365200	2	0	.	41305000	41365200	255,255,51
chr10	41365200	41366600	3	0	.	41365200	41366600	255,0,0
chr10	41366600	41395000	2	0	.	41366600	41395000	255,255,51
chr10	41395000	41396000	3	0	.	41395000	41396000	255,0,0
chr10	41396000	41449400	2	0	.	41396000	41449400	255,255,51
chr10	41449400	41451400	1	0	.	41449400	41451400	0,153,0
chr10	41451400	41472800	2	0	.	41451400	41472800	255,255,51
chr10	41472800	41478600	1	0	.	41472800	41478600	0,153,0
chr10	41478600	41488600	2	0	.	41478600	41488600	255,255,51
chr10	41488600	41491400	1	0	.	41488600	41491400	0,153,0
chr10	41491400	41518200	2	0	.	41491400	41518200	255,255,51
chr10	41518200	41526000	1	0	.	41518200	41526000	0,153,0
chr10	41526000	41527000	2	0	.	41526000	41527000	255,255,51
chr10	41527000	41527800	1	0	.	41527000	41527800	0,153,0
chr10	41527800	41529400	2	0	.	41527800	41529400	255,255,51
chr10	41529400	41531400	1	0	.	41529400	41531400	0,153,0
chr10	41531400	41536800	2	0	.	41531400	41536800	255,255,51
chr10	41536800	41537000	1	0	.	41536800	41537000	0,153,0
chr10	41537000	41552400	2	0	.	41537000	41552400	255,255,51
chr10	41552400	41552800	1	0	.	41552400	41552800	0,153,0
chr10	41552800	41565200	2	0	.	41552800	41565200	255,255,51
chr10	41565200	41565400	1	0	.	41565200	41565400	0,153,0
chr10	41565400	41594600	2	0	.	41565400	41594600	255,255,51
chr10	41594600	41596200	1	0	.	41594600	41596200	0,153,0
chr10	41596200	41598000	2	0	.	41596200	41598000	255,255,51
chr10	41598000	41598400	1	0	.	41598000	41598400	0,153,0
chr10	41598400	41599800	2	0	.	41598400	41599800	255,255,51
chr10	41599800	41600200	1	0	.	41599800	41600200	0,153,0
chr10	41600200	41602000	2	0	.	41600200	41602000	255,255,51
chr10	41602000	41603200	1	0	.	41602000	41603200	0,153,0
chr10	41603200	41604600	2	0	.	41603200	41604600	255,255,51
chr10	41604600	41607200	1	0	.	41604600	41607200	0,153,0
chr10	41607200	41619800	2	0	.	41607200	41619800	255,255,51
chr10	41619800	41620600	1	0	.	41619800	41620600	0,153,0
chr10	41620600	41690000	2	0	.	41620600	41690000	255,255,51
chr10	41690000	41690400	1	0	.	41690000	41690400	0,153,0
chr10	41690400	41709600	2	0	.	41690400	41709600	255,255,51
chr10	41709600	41709800	1	0	.	41709600	41709800	0,153,0
chr10	41709800	41711400	2	0	.	41709800	41711400	255,255,51
chr10	41711400	41712200	1	0	.	41711400	41712200	0,153,0
chr10	41712200	41714200	2	0	.	41712200	41714200	255,255,51
chr10	41714200	41715200	1	0	.	41714200	41715200	0,153,0
chr10	41715200	41752000	2	0	.	41715200	41752000	255,255,51
chr10	41752000	41752400	1	0	.	41752000	41752400	0,153,0
chr10	41752400	41766800	2	0	.	41752400	41766800	255,255,51
chr10	41766800	41768000	1	0	.	41766800	41768000	0,153,0
chr10	41768000	41808600	2	0	.	41768000	41808600	255,255,51
chr10	41808600	41815000	1	0	.	41808600	41815000	0,153,0
chr10	41815000	41822400	2	0	.	41815000	41822400	255,255,51
chr10	41822400	41823000	1	0	.	41822400	41823000	0,153,0
chr10	41823000	41830800	2	0	.	41823000	41830800	255,255,51
chr10	41830800	41831400	1	0	.	41830800	41831400	0,153,0
chr10	41831400	41838400	2	0	.	41831400	41838400	255,255,51
chr10	41838400	41838800	1	0	.	41838400	41838800	0,153,0
chr10	41838800	41862800	2	0	.	41838800	41862800	255,255,51
chr10	41862800	41863800	1	0	.	41862800	41863800	0,153,0
chr10	41863800	41880800	2	0	.	41863800	41880800	255,255,51
chr10	41880800	41881000	1	0	.	41880800	41881000	0,153,0
chr10	41881000	41886000	2	0	.	41881000	41886000	255,255,51
chr10	41886000	41894600	1	0	.	41886000	41894600	0,153,0
chr10	41894600	41910000	2	0	.	41894600	41910000	255,255,51
chr10	41910000	41911400	1	0	.	41910000	41911400	0,153,0
chr10	41911400	41936600	2	0	.	41911400	41936600	255,255,51
chr10	41936600	41938000	1	0	.	41936600	41938000	0,153,0
chr10	41938000	41957400	2	0	.	41938000	41957400	255,255,51
chr10	41957400	41958200	1	0	.	41957400	41958200	0,153,0
chr10	41958200	41972600	2	0	.	41958200	41972600	255,255,51
chr10	41972600	41973200	1	0	.	41972600	41973200	0,153,0
chr10	41973200	41977800	2	0	.	41973200	41977800	255,255,51
chr10	41977800	41980000	1	0	.	41977800	41980000	0,153,0
chr10	41980000	42018200	2	0	.	41980000	42018200	255,255,51
chr10	42018200	42019200	1	0	.	42018200	42019200	0,153,0
chr10	42019200	42027800	2	0	.	42019200	42027800	255,255,51
chr10	42027800	42028600	1	0	.	42027800	42028600	0,153,0
chr10	42028600	42031000	2	0	.	42028600	42031000	255,255,51
chr10	42031000	42031400	1	0	.	42031000	42031400	0,153,0
chr10	42031400	42051800	2	0	.	42031400	42051800	255,255,51
chr10	42051800	42053000	1	0	.	42051800	42053000	0,153,0
chr10	42053000	42054200	2	0	.	42053000	42054200	255,255,51
chr10	42054200	42058600	1	0	.	42054200	42058600	0,153,0
chr10	42058600	42068000	2	0	.	42058600	42068000	255,255,51
chr10	42068000	42069400	1	0	.	42068000	42069400	0,153,0
chr10	42069400	42192400	2	0	.	42069400	42192400	255,255,51
chr10	42192400	42193600	1	0	.	42192400	42193600	0,153,0
chr10	42193600	42194600	2	0	.	42193600	42194600	255,255,51
chr10	42194600	42195400	1	0	.	42194600	42195400	0,153,0
chr10	42195400	42220600	2	0	.	42195400	42220600	255,255,51
chr10	42220600	42221400	1	0	.	42220600	42221400	0,153,0
chr10	42221400	42268600	2	0	.	42221400	42268600	255,255,51
chr10	42268600	42279200	1	0	.	42268600	42279200	0,153,0
chr10	42279200	42293800	2	0	.	42279200	42293800	255,255,51
chr10	42293800	42294200	1	0	.	42293800	42294200	0,153,0
chr10	42294200	42477400	2	0	.	42294200	42477400	255,255,51
chr10	42477400	42479000	1	0	.	42477400	42479000	0,153,0
chr10	42479000	42501200	2	0	.	42479000	42501200	255,255,51
chr10	42501200	42504800	1	0	.	42501200	42504800	0,153,0
chr10	42504800	42561600	2	0	.	42504800	42561600	255,255,51
chr10	42561600	42599400	3	0	.	42561600	42599400	255,0,0
chr10	42599400	42607000	2	0	.	42599400	42607000	255,255,51
chr10	42607000	42631800	3	0	.	42607000	42631800	255,0,0
chr10	42631800	42634000	1	0	.	42631800	42634000	0,153,0
chr10	42634000	42636800	3	0	.	42634000	42636800	255,0,0
chr10	42636800	42637400	1	0	.	42636800	42637400	0,153,0
chr10	42637400	42678400	2	0	.	42637400	42678400	255,255,51
chr10	42678400	42680800	1	0	.	42678400	42680800	0,153,0
chr10	42680800	42714600	2	0	.	42680800	42714600	255,255,51
chr10	42714600	42717600	3	0	.	42714600	42717600	255,0,0
chr10	42717600	42751000	2	0	.	42717600	42751000	255,255,51
chr10	42751000	42758000	3	0	.	42751000	42758000	255,0,0
chr10	42758000	42761000	2	0	.	42758000	42761000	255,255,51
chr10	42761000	42764400	1	0	.	42761000	42764400	0,153,0
chr10	42764400	42837400	2	0	.	42764400	42837400	255,255,51
chr10	42837400	42839600	1	0	.	42837400	42839600	0,153,0
chr10	42839600	42859800	2	0	.	42839600	42859800	255,255,51
chr10	42859800	42864600	1	0	.	42859800	42864600	0,153,0
chr10	42864600	42886800	2	0	.	42864600	42886800	255,255,51
chr10	42886800	42889000	1	0	.	42886800	42889000	0,153,0
chr10	42889000	42897200	2	0	.	42889000	42897200	255,255,51
chr10	42897200	42898000	1	0	.	42897200	42898000	0,153,0
chr10	42898000	42918200	2	0	.	42898000	42918200	255,255,51
chr10	42918200	42918600	1	0	.	42918200	42918600	0,153,0
chr10	42918600	42934600	2	0	.	42918600	42934600	255,255,51
chr10	42934600	42935000	1	0	.	42934600	42935000	0,153,0
chr10	42935000	42942000	2	0	.	42935000	42942000	255,255,51
chr10	42942000	42942600	1	0	.	42942000	42942600	0,153,0
chr10	42942600	42962000	2	0	.	42942600	42962000	255,255,51
chr10	42962000	42963200	1	0	.	42962000	42963200	0,153,0
chr10	42963200	43001200	2	0	.	42963200	43001200	255,255,51
chr10	43001200	43004200	3	0	.	43001200	43004200	255,0,0
chr10	43004200	43011800	2	0	.	43004200	43011800	255,255,51
chr10	43011800	43026000	3	0	.	43011800	43026000	255,0,0
chr10	43026000	43034800	2	0	.	43026000	43034800	255,255,51
chr10	43034800	43035400	1	0	.	43034800	43035400	0,153,0
chr10	43035400	43163800	2	0	.	43035400	43163800	255,255,51
chr10	43163800	43172800	3	0	.	43163800	43172800	255,0,0
chr10	43172800	43174000	1	0	.	43172800	43174000	0,153,0
chr10	43174000	43181200	3	0	.	43174000	43181200	255,0,0
chr10	43181200	43217600	2	0	.	43181200	43217600	255,255,51
chr10	43217600	43218000	1	0	.	43217600	43218000	0,153,0
chr10	43218000	43220000	2	0	.	43218000	43220000	255,255,51
chr10	43220000	43222800	1	0	.	43220000	43222800	0,153,0
chr10	43222800	43452000	2	0	.	43222800	43452000	255,255,51
chr10	43452000	43452800	1	0	.	43452000	43452800	0,153,0
chr10	43452800	43477200	2	0	.	43452800	43477200	255,255,51
chr10	43477200	43477800	3	0	.	43477200	43477800	255,0,0
chr10	43477800	43480800	1	0	.	43477800	43480800	0,153,0
chr10	43480800	43539800	2	0	.	43480800	43539800	255,255,51
chr10	43539800	43541400	1	0	.	43539800	43541400	0,153,0
chr10	43541400	43574200	2	0	.	43541400	43574200	255,255,51
chr10	43574200	43577800	3	0	.	43574200	43577800	255,0,0
chr10	43577800	43579400	1	0	.	43577800	43579400	0,153,0
chr10	43579400	43584800	3	0	.	43579400	43584800	255,0,0
chr10	43584800	43721400	2	0	.	43584800	43721400	255,255,51
chr10	43721400	43725600	3	0	.	43721400	43725600	255,0,0
chr10	43725600	43753600	2	0	.	43725600	43753600	255,255,51
chr10	43753600	43755400	3	0	.	43753600	43755400	255,0,0
chr10	43755400	43794600	2	0	.	43755400	43794600	255,255,51
chr10	43794600	43797200	3	0	.	43794600	43797200	255,0,0
chr10	43797200	43900800	2	0	.	43797200	43900800	255,255,51
chr10	43900800	43903000	1	0	.	43900800	43903000	0,153,0
chr10	43903000	43934800	2	0	.	43903000	43934800	255,255,51
chr10	43934800	43935200	1	0	.	43934800	43935200	0,153,0
chr10	43935200	43954000	2	0	.	43935200	43954000	255,255,51
chr10	43954000	43954400	1	0	.	43954000	43954400	0,153,0
chr10	43954400	43957600	3	0	.	43954400	43957600	255,0,0
chr10	43957600	43968800	2	0	.	43957600	43968800	255,255,51
chr10	43968800	43969600	1	0	.	43968800	43969600	0,153,0
chr10	43969600	43995800	2	0	.	43969600	43995800	255,255,51
chr10	43995800	43997800	1	0	.	43995800	43997800	0,153,0
chr10	43997800	43998600	2	0	.	43997800	43998600	255,255,51
chr10	43998600	43998800	1	0	.	43998600	43998800	0,153,0
chr10	43998800	44002400	2	0	.	43998800	44002400	255,255,51
chr10	44002400	44004600	1	0	.	44002400	44004600	0,153,0
chr10	44004600	44017200	3	0	.	44004600	44017200	255,0,0
chr10	44017200	44036000	2	0	.	44017200	44036000	255,255,51
chr10	44036000	44043600	3	0	.	44036000	44043600	255,0,0
chr10	44043600	44065400	2	0	.	44043600	44065400	255,255,51
chr10	44065400	44065600	1	0	.	44065400	44065600	0,153,0
chr10	44065600	44073000	2	0	.	44065600	44073000	255,255,51
chr10	44073000	44079400	3	0	.	44073000	44079400	255,0,0
chr10	44079400	44147000	2	0	.	44079400	44147000	255,255,51
chr10	44147000	44158400	3	0	.	44147000	44158400	255,0,0
chr10	44158400	44178200	2	0	.	44158400	44178200	255,255,51
chr10	44178200	44194200	3	0	.	44178200	44194200	255,0,0
chr10	44194200	44267200	2	0	.	44194200	44267200	255,255,51
chr10	44267200	44270200	1	0	.	44267200	44270200	0,153,0
chr10	44270200	44282200	2	0	.	44270200	44282200	255,255,51
chr10	44282200	44283000	1	0	.	44282200	44283000	0,153,0
chr10	44283000	44292200	2	0	.	44283000	44292200	255,255,51
chr10	44292200	44292800	1	0	.	44292200	44292800	0,153,0
chr10	44292800	44321600	2	0	.	44292800	44321600	255,255,51
chr10	44321600	44323200	1	0	.	44321600	44323200	0,153,0
chr10	44323200	44326600	2	0	.	44323200	44326600	255,255,51
chr10	44326600	44327400	1	0	.	44326600	44327400	0,153,0
chr10	44327400	44328600	2	0	.	44327400	44328600	255,255,51
chr10	44328600	44328800	1	0	.	44328600	44328800	0,153,0
chr10	44328800	44341800	2	0	.	44328800	44341800	255,255,51
chr10	44341800	44342200	1	0	.	44341800	44342200	0,153,0
chr10	44342200	44368400	2	0	.	44342200	44368400	255,255,51
chr10	44368400	44368800	1	0	.	44368400	44368800	0,153,0
chr10	44368800	44379600	2	0	.	44368800	44379600	255,255,51
chr10	44379600	44381600	1	0	.	44379600	44381600	0,153,0
chr10	44381600	44389400	2	0	.	44381600	44389400	255,255,51
chr10	44389400	44389800	1	0	.	44389400	44389800	0,153,0
chr10	44389800	44400200	2	0	.	44389800	44400200	255,255,51
chr10	44400200	44404600	1	0	.	44400200	44404600	0,153,0
chr10	44404600	44409600	2	0	.	44404600	44409600	255,255,51
chr10	44409600	44410200	1	0	.	44409600	44410200	0,153,0
chr10	44410200	44426800	2	0	.	44410200	44426800	255,255,51
chr10	44426800	44427600	1	0	.	44426800	44427600	0,153,0
chr10	44427600	44429000	2	0	.	44427600	44429000	255,255,51
chr10	44429000	44430400	1	0	.	44429000	44430400	0,153,0
chr10	44430400	44434600	2	0	.	44430400	44434600	255,255,51
chr10	44434600	44435000	1	0	.	44434600	44435000	0,153,0
chr10	44435000	44445600	2	0	.	44435000	44445600	255,255,51
chr10	44445600	44460600	1	0	.	44445600	44460600	0,153,0
chr10	44460600	44483000	2	0	.	44460600	44483000	255,255,51
chr10	44483000	44483800	1	0	.	44483000	44483800	0,153,0
chr10	44483800	44523000	2	0	.	44483800	44523000	255,255,51
chr10	44523000	44527200	3	0	.	44523000	44527200	255,0,0
chr10	44527200	44530800	1	0	.	44527200	44530800	0,153,0
chr10	44530800	44532200	2	0	.	44530800	44532200	255,255,51
chr10	44532200	44533000	1	0	.	44532200	44533000	0,153,0
chr10	44533000	44537000	2	0	.	44533000	44537000	255,255,51
chr10	44537000	44539800	1	0	.	44537000	44539800	0,153,0
chr10	44539800	44564800	2	0	.	44539800	44564800	255,255,51
chr10	44564800	44566400	1	0	.	44564800	44566400	0,153,0
chr10	44566400	44569800	2	0	.	44566400	44569800	255,255,51
chr10	44569800	44572400	3	0	.	44569800	44572400	255,0,0
chr10	44572400	44609200	2	0	.	44572400	44609200	255,255,51
chr10	44609200	44609600	1	0	.	44609200	44609600	0,153,0
chr10	44609600	44612200	2	0	.	44609600	44612200	255,255,51
chr10	44612200	44613000	1	0	.	44612200	44613000	0,153,0
chr10	44613000	44615600	2	0	.	44613000	44615600	255,255,51
chr10	44615600	44616600	1	0	.	44615600	44616600	0,153,0
chr10	44616600	44629800	2	0	.	44616600	44629800	255,255,51
chr10	44629800	44631600	1	0	.	44629800	44631600	0,153,0
chr10	44631600	44638200	2	0	.	44631600	44638200	255,255,51
chr10	44638200	44639200	1	0	.	44638200	44639200	0,153,0
chr10	44639200	44700000	2	0	.	44639200	44700000	255,255,51
chr10	44700000	44700800	1	0	.	44700000	44700800	0,153,0
chr10	44700800	44701400	2	0	.	44700800	44701400	255,255,51
chr10	44701400	44702800	1	0	.	44701400	44702800	0,153,0
chr10	44702800	44704000	2	0	.	44702800	44704000	255,255,51
chr10	44704000	44705000	1	0	.	44704000	44705000	0,153,0
chr10	44705000	44706600	2	0	.	44705000	44706600	255,255,51
chr10	44706600	44707000	1	0	.	44706600	44707000	0,153,0
chr10	44707000	44818400	2	0	.	44707000	44818400	255,255,51
chr10	44818400	44823200	1	0	.	44818400	44823200	0,153,0
chr10	44823200	44840000	2	0	.	44823200	44840000	255,255,51
chr10	44840000	44840800	1	0	.	44840000	44840800	0,153,0
chr10	44840800	44845200	2	0	.	44840800	44845200	255,255,51
chr10	44845200	44846800	1	0	.	44845200	44846800	0,153,0
chr10	44846800	44919000	2	0	.	44846800	44919000	255,255,51
chr10	44919000	44919400	1	0	.	44919000	44919400	0,153,0
chr10	44919400	44979000	2	0	.	44919400	44979000	255,255,51
chr10	44979000	44979600	1	0	.	44979000	44979600	0,153,0
chr10	44979600	45000200	2	0	.	44979600	45000200	255,255,51
chr10	45000200	45004000	1	0	.	45000200	45004000	0,153,0
chr10	45004000	45019200	2	0	.	45004000	45019200	255,255,51
chr10	45019200	45020800	1	0	.	45019200	45020800	0,153,0
chr10	45020800	45027000	2	0	.	45020800	45027000	255,255,51
chr10	45027000	45027800	1	0	.	45027000	45027800	0,153,0
chr10	45027800	45065600	2	0	.	45027800	45065600	255,255,51
chr10	45065600	45068800	1	0	.	45065600	45068800	0,153,0
chr10	45068800	45181000	2	0	.	45068800	45181000	255,255,51
chr10	45181000	45182800	3	0	.	45181000	45182800	255,0,0
chr10	45182800	45205000	2	0	.	45182800	45205000	255,255,51
chr10	45205000	45207800	3	0	.	45205000	45207800	255,0,0
chr10	45207800	45288000	2	0	.	45207800	45288000	255,255,51
chr10	45288000	45294000	3	0	.	45288000	45294000	255,0,0
chr10	45294000	45329200	2	0	.	45294000	45329200	255,255,51
chr10	45329200	45338800	3	0	.	45329200	45338800	255,0,0
chr10	45338800	45457200	2	0	.	45338800	45457200	255,255,51
chr10	45457200	45486200	3	0	.	45457200	45486200	255,0,0
chr10	45486200	45487200	1	0	.	45486200	45487200	0,153,0
chr10	45487200	45492800	3	0	.	45487200	45492800	255,0,0
chr10	45492800	50591200	2	0	.	45492800	50591200	255,255,51
chr10	50591200	50595000	1	0	.	50591200	50595000	0,153,0
chr10	50595000	50762800	2	0	.	50595000	50762800	255,255,51
chr10	50762800	50763600	1	0	.	50762800	50763600	0,153,0
chr10	50763600	50869200	2	0	.	50763600	50869200	255,255,51
chr10	50869200	50872000	3	0	.	50869200	50872000	255,0,0
chr10	50872000	50884400	2	0	.	50872000	50884400	255,255,51
chr10	50884400	50926800	3	0	.	50884400	50926800	255,0,0
chr10	50926800	51405000	2	0	.	50926800	51405000	255,255,51
chr10	51405000	51405600	1	0	.	51405000	51405600	0,153,0
chr10	51405600	51412200	2	0	.	51405600	51412200	255,255,51
chr10	51412200	51413200	1	0	.	51412200	51413200	0,153,0
chr10	51413200	51421600	2	0	.	51413200	51421600	255,255,51
chr10	51421600	51423000	1	0	.	51421600	51423000	0,153,0
chr10	51423000	51452200	2	0	.	51423000	51452200	255,255,51
chr10	51452200	51456800	1	0	.	51452200	51456800	0,153,0
chr10	51456800	51479000	2	0	.	51456800	51479000	255,255,51
chr10	51479000	51483800	1	0	.	51479000	51483800	0,153,0
chr10	51483800	51486400	2	0	.	51483800	51486400	255,255,51
chr10	51486400	51494000	1	0	.	51486400	51494000	0,153,0
chr10	51494000	51519200	2	0	.	51494000	51519200	255,255,51
chr10	51519200	51521400	1	0	.	51519200	51521400	0,153,0
chr10	51521400	51525400	2	0	.	51521400	51525400	255,255,51
chr10	51525400	51525800	1	0	.	51525400	51525800	0,153,0
chr10	51525800	51527600	2	0	.	51525800	51527600	255,255,51
chr10	51527600	51529800	1	0	.	51527600	51529800	0,153,0
chr10	51529800	51536200	2	0	.	51529800	51536200	255,255,51
chr10	51536200	51537200	1	0	.	51536200	51537200	0,153,0
chr10	51537200	51551600	2	0	.	51537200	51551600	255,255,51
chr10	51551600	51552400	1	0	.	51551600	51552400	0,153,0
chr10	51552400	51552800	2	0	.	51552400	51552800	255,255,51
chr10	51552800	51554200	1	0	.	51552800	51554200	0,153,0
chr10	51554200	51589400	2	0	.	51554200	51589400	255,255,51
chr10	51589400	51592600	3	0	.	51589400	51592600	255,0,0
chr10	51592600	51595800	2	0	.	51592600	51595800	255,255,51
chr10	51595800	51601200	3	0	.	51595800	51601200	255,0,0
chr10	51601200	51609800	2	0	.	51601200	51609800	255,255,51
chr10	51609800	51623000	3	0	.	51609800	51623000	255,0,0
chr10	51623000	51674600	2	0	.	51623000	51674600	255,255,51
chr10	51674600	51689200	3	0	.	51674600	51689200	255,0,0
chr10	51689200	52230200	2	0	.	51689200	52230200	255,255,51
chr10	52230200	52232600	3	0	.	52230200	52232600	255,0,0
chr10	52232600	52234800	1	0	.	52232600	52234800	0,153,0
chr10	52234800	52236800	3	0	.	52234800	52236800	255,0,0
chr10	52236800	52379600	2	0	.	52236800	52379600	255,255,51
chr10	52379600	52383800	1	0	.	52379600	52383800	0,153,0
chr10	52383800	52389800	2	0	.	52383800	52389800	255,255,51
chr10	52389800	52391800	3	0	.	52389800	52391800	255,0,0
chr10	52391800	52416800	2	0	.	52391800	52416800	255,255,51
chr10	52416800	52419600	1	0	.	52416800	52419600	0,153,0
chr10	52419600	52420400	2	0	.	52419600	52420400	255,255,51
chr10	52420400	52421000	1	0	.	52420400	52421000	0,153,0
chr10	52421000	53347400	2	0	.	52421000	53347400	255,255,51
chr10	53347400	53369400	3	0	.	53347400	53369400	255,0,0
chr10	53369400	53374000	2	0	.	53369400	53374000	255,255,51
chr10	53374000	53374800	1	0	.	53374000	53374800	0,153,0
chr10	53374800	53375800	2	0	.	53374800	53375800	255,255,51
chr10	53375800	53378400	3	0	.	53375800	53378400	255,0,0
chr10	53378400	53380400	1	0	.	53378400	53380400	0,153,0
chr10	53380400	53399200	3	0	.	53380400	53399200	255,0,0
chr10	53399200	53416600	2	0	.	53399200	53416600	255,255,51
chr10	53416600	53427200	3	0	.	53416600	53427200	255,0,0
chr10	53427200	53440600	2	0	.	53427200	53440600	255,255,51
chr10	53440600	53460600	3	0	.	53440600	53460600	255,0,0
chr10	53460600	53462000	1	0	.	53460600	53462000	0,153,0
chr10	53462000	53470800	3	0	.	53462000	53470800	255,0,0
chr10	53470800	53505800	2	0	.	53470800	53505800	255,255,51
chr10	53505800	53507000	3	0	.	53505800	53507000	255,0,0
chr10	53507000	53525800	2	0	.	53507000	53525800	255,255,51
chr10	53525800	53526000	1	0	.	53525800	53526000	0,153,0
chr10	53526000	53595600	2	0	.	53526000	53595600	255,255,51
chr10	53595600	53600000	1	0	.	53595600	53600000	0,153,0
chr10	53600000	53628600	2	0	.	53600000	53628600	255,255,51
chr10	53628600	53630600	1	0	.	53628600	53630600	0,153,0
chr10	53630600	53750400	2	0	.	53630600	53750400	255,255,51
chr10	53750400	53751400	1	0	.	53750400	53751400	0,153,0
chr10	53751400	53752200	3	0	.	53751400	53752200	255,0,0
chr10	53752200	53771200	2	0	.	53752200	53771200	255,255,51
chr10	53771200	53772800	1	0	.	53771200	53772800	0,153,0
chr10	53772800	54035400	2	0	.	53772800	54035400	255,255,51
chr10	54035400	54041600	1	0	.	54035400	54041600	0,153,0
chr10	54041600	54063400	2	0	.	54041600	54063400	255,255,51
chr10	54063400	54064000	1	0	.	54063400	54064000	0,153,0
chr10	54064000	54070200	2	0	.	54064000	54070200	255,255,51
chr10	54070200	54077800	1	0	.	54070200	54077800	0,153,0
chr10	54077800	54091800	2	0	.	54077800	54091800	255,255,51
chr10	54091800	54092600	1	0	.	54091800	54092600	0,153,0
chr10	54092600	54117600	2	0	.	54092600	54117600	255,255,51
chr10	54117600	54119400	1	0	.	54117600	54119400	0,153,0
chr10	54119400	56107000	2	0	.	54119400	56107000	255,255,51
chr10	56107000	56107600	1	0	.	56107000	56107600	0,153,0
chr10	56107600	56115200	2	0	.	56107600	56115200	255,255,51
chr10	56115200	56115600	1	0	.	56115200	56115600	0,153,0
chr10	56115600	56227600	2	0	.	56115600	56227600	255,255,51
chr10	56227600	56229600	1	0	.	56227600	56229600	0,153,0
chr10	56229600	56374200	2	0	.	56229600	56374200	255,255,51
chr10	56374200	56377200	3	0	.	56374200	56377200	255,0,0
chr10	56377200	56379000	1	0	.	56377200	56379000	0,153,0
chr10	56379000	56381000	3	0	.	56379000	56381000	255,0,0
chr10	56381000	56419400	2	0	.	56381000	56419400	255,255,51
chr10	56419400	56420200	3	0	.	56419400	56420200	255,0,0
chr10	56420200	56775600	2	0	.	56420200	56775600	255,255,51
chr10	56775600	56776600	1	0	.	56775600	56776600	0,153,0
chr10	56776600	56852200	2	0	.	56776600	56852200	255,255,51
chr10	56852200	56853000	1	0	.	56852200	56853000	0,153,0
chr10	56853000	56912200	2	0	.	56853000	56912200	255,255,51
chr10	56912200	56913800	1	0	.	56912200	56913800	0,153,0
chr10	56913800	56944600	2	0	.	56913800	56944600	255,255,51
chr10	56944600	56945000	1	0	.	56944600	56945000	0,153,0
chr10	56945000	56965000	2	0	.	56945000	56965000	255,255,51
chr10	56965000	56966000	1	0	.	56965000	56966000	0,153,0
chr10	56966000	56973800	2	0	.	56966000	56973800	255,255,51
chr10	56973800	56975000	1	0	.	56973800	56975000	0,153,0
chr10	56975000	56980000	2	0	.	56975000	56980000	255,255,51
chr10	56980000	56982200	1	0	.	56980000	56982200	0,153,0
chr10	56982200	57457800	2	0	.	56982200	57457800	255,255,51
chr10	57457800	57461600	3	0	.	57457800	57461600	255,0,0
chr10	57461600	57485800	2	0	.	57461600	57485800	255,255,51
chr10	57485800	57487800	1	0	.	57485800	57487800	0,153,0
chr10	57487800	57529400	2	0	.	57487800	57529400	255,255,51
chr10	57529400	57529600	1	0	.	57529400	57529600	0,153,0
chr10	57529600	57530200	2	0	.	57529600	57530200	255,255,51
chr10	57530200	57533000	1	0	.	57530200	57533000	0,153,0
chr10	57533000	57538000	2	0	.	57533000	57538000	255,255,51
chr10	57538000	57541400	3	0	.	57538000	57541400	255,0,0
chr10	57541400	57632600	2	0	.	57541400	57632600	255,255,51
chr10	57632600	57634200	3	0	.	57632600	57634200	255,0,0
chr10	57634200	57666400	2	0	.	57634200	57666400	255,255,51
chr10	57666400	57666600	1	0	.	57666400	57666600	0,153,0
chr10	57666600	57731600	2	0	.	57666600	57731600	255,255,51
chr10	57731600	57732000	1	0	.	57731600	57732000	0,153,0
chr10	57732000	57743600	2	0	.	57732000	57743600	255,255,51
chr10	57743600	57744200	1	0	.	57743600	57744200	0,153,0
chr10	57744200	57752400	2	0	.	57744200	57752400	255,255,51
chr10	57752400	57753800	1	0	.	57752400	57753800	0,153,0
chr10	57753800	57755000	2	0	.	57753800	57755000	255,255,51
chr10	57755000	57755800	1	0	.	57755000	57755800	0,153,0
chr10	57755800	57794400	2	0	.	57755800	57794400	255,255,51
chr10	57794400	57796600	1	0	.	57794400	57796600	0,153,0
chr10	57796600	57799200	2	0	.	57796600	57799200	255,255,51
chr10	57799200	57799800	1	0	.	57799200	57799800	0,153,0
chr10	57799800	57830200	2	0	.	57799800	57830200	255,255,51
chr10	57830200	57834800	3	0	.	57830200	57834800	255,0,0
chr10	57834800	57835000	2	0	.	57834800	57835000	255,255,51
chr10	57835000	57836200	1	0	.	57835000	57836200	0,153,0
chr10	57836200	57843200	2	0	.	57836200	57843200	255,255,51
chr10	57843200	57847000	3	0	.	57843200	57847000	255,0,0
chr10	57847000	58254400	2	0	.	57847000	58254400	255,255,51
chr10	58254400	58256600	1	0	.	58254400	58256600	0,153,0
chr10	58256600	58282200	2	0	.	58256600	58282200	255,255,51
chr10	58282200	58282600	1	0	.	58282200	58282600	0,153,0
chr10	58282600	58321800	2	0	.	58282600	58321800	255,255,51
chr10	58321800	58327400	1	0	.	58321800	58327400	0,153,0
chr10	58327400	58351200	2	0	.	58327400	58351200	255,255,51
chr10	58351200	58355600	1	0	.	58351200	58355600	0,153,0
chr10	58355600	58356200	2	0	.	58355600	58356200	255,255,51
chr10	58356200	58356400	1	0	.	58356200	58356400	0,153,0
chr10	58356400	58359200	2	0	.	58356400	58359200	255,255,51
chr10	58359200	58359400	1	0	.	58359200	58359400	0,153,0
chr10	58359400	58366800	2	0	.	58359400	58366800	255,255,51
chr10	58366800	58367000	1	0	.	58366800	58367000	0,153,0
chr10	58367000	58368200	2	0	.	58367000	58368200	255,255,51
chr10	58368200	58375200	1	0	.	58368200	58375200	0,153,0
chr10	58375200	58377800	2	0	.	58375200	58377800	255,255,51
chr10	58377800	58378200	1	0	.	58377800	58378200	0,153,0
chr10	58378200	58380400	2	0	.	58378200	58380400	255,255,51
chr10	58380400	58384600	1	0	.	58380400	58384600	0,153,0
chr10	58384600	58392200	2	0	.	58384600	58392200	255,255,51
chr10	58392200	58394200	1	0	.	58392200	58394200	0,153,0
chr10	58394200	58405800	2	0	.	58394200	58405800	255,255,51
chr10	58405800	58406200	1	0	.	58405800	58406200	0,153,0
chr10	58406200	58408000	2	0	.	58406200	58408000	255,255,51
chr10	58408000	58408200	1	0	.	58408000	58408200	0,153,0
chr10	58408200	58418600	2	0	.	58408200	58418600	255,255,51
chr10	58418600	58419000	1	0	.	58418600	58419000	0,153,0
chr10	58419000	58445000	2	0	.	58419000	58445000	255,255,51
chr10	58445000	58449400	1	0	.	58445000	58449400	0,153,0
chr10	58449400	58464000	2	0	.	58449400	58464000	255,255,51
chr10	58464000	58464800	1	0	.	58464000	58464800	0,153,0
chr10	58464800	58496800	2	0	.	58464800	58496800	255,255,51
chr10	58496800	58499800	1	0	.	58496800	58499800	0,153,0
chr10	58499800	58713600	2	0	.	58499800	58713600	255,255,51
chr10	58713600	58714800	1	0	.	58713600	58714800	0,153,0
chr10	58714800	58807400	2	0	.	58714800	58807400	255,255,51
chr10	58807400	58815000	3	0	.	58807400	58815000	255,0,0
chr10	58815000	59215400	2	0	.	58815000	59215400	255,255,51
chr10	59215400	59220400	3	0	.	59215400	59220400	255,0,0
chr10	59220400	59223600	1	0	.	59220400	59223600	0,153,0
chr10	59223600	59224800	2	0	.	59223600	59224800	255,255,51
chr10	59224800	59225000	1	0	.	59224800	59225000	0,153,0
chr10	59225000	59225600	2	0	.	59225000	59225600	255,255,51
chr10	59225600	59225800	1	0	.	59225600	59225800	0,153,0
chr10	59225800	59259200	2	0	.	59225800	59259200	255,255,51
chr10	59259200	59266600	3	0	.	59259200	59266600	255,0,0
chr10	59266600	59276600	2	0	.	59266600	59276600	255,255,51
chr10	59276600	59277600	3	0	.	59276600	59277600	255,0,0
chr10	59277600	59322400	2	0	.	59277600	59322400	255,255,51
chr10	59322400	59327400	1	0	.	59322400	59327400	0,153,0
chr10	59327400	59334800	2	0	.	59327400	59334800	255,255,51
chr10	59334800	59336600	1	0	.	59334800	59336600	0,153,0
chr10	59336600	59379800	2	0	.	59336600	59379800	255,255,51
chr10	59379800	59380600	1	0	.	59379800	59380600	0,153,0
chr10	59380600	59430600	2	0	.	59380600	59430600	255,255,51
chr10	59430600	59432200	1	0	.	59430600	59432200	0,153,0
chr10	59432200	59511400	2	0	.	59432200	59511400	255,255,51
chr10	59511400	59512200	1	0	.	59511400	59512200	0,153,0
chr10	59512200	59577600	2	0	.	59512200	59577600	255,255,51
chr10	59577600	59579600	1	0	.	59577600	59579600	0,153,0
chr10	59579600	59589000	2	0	.	59579600	59589000	255,255,51
chr10	59589000	59590400	1	0	.	59589000	59590400	0,153,0
chr10	59590400	59608000	2	0	.	59590400	59608000	255,255,51
chr10	59608000	59608600	1	0	.	59608000	59608600	0,153,0
chr10	59608600	59615000	2	0	.	59608600	59615000	255,255,51
chr10	59615000	59617400	1	0	.	59615000	59617400	0,153,0
chr10	59617400	59636200	2	0	.	59617400	59636200	255,255,51
chr10	59636200	59638200	1	0	.	59636200	59638200	0,153,0
chr10	59638200	59698600	2	0	.	59638200	59698600	255,255,51
chr10	59698600	59699200	1	0	.	59698600	59699200	0,153,0
chr10	59699200	59702000	2	0	.	59699200	59702000	255,255,51
chr10	59702000	59704400	1	0	.	59702000	59704400	0,153,0
chr10	59704400	59932400	2	0	.	59704400	59932400	255,255,51
chr10	59932400	59933200	1	0	.	59932400	59933200	0,153,0
chr10	59933200	59947400	2	0	.	59933200	59947400	255,255,51
chr10	59947400	59953200	1	0	.	59947400	59953200	0,153,0
chr10	59953200	59973000	2	0	.	59953200	59973000	255,255,51
chr10	59973000	59973200	1	0	.	59973000	59973200	0,153,0
chr10	59973200	59973600	2	0	.	59973200	59973600	255,255,51
chr10	59973600	59975400	1	0	.	59973600	59975400	0,153,0
chr10	59975400	59980600	2	0	.	59975400	59980600	255,255,51
chr10	59980600	59981800	1	0	.	59980600	59981800	0,153,0
chr10	59981800	60001400	2	0	.	59981800	60001400	255,255,51
chr10	60001400	60004200	1	0	.	60001400	60004200	0,153,0
chr10	60004200	60038200	2	0	.	60004200	60038200	255,255,51
chr10	60038200	60039000	1	0	.	60038200	60039000	0,153,0
chr10	60039000	60080400	2	0	.	60039000	60080400	255,255,51
chr10	60080400	60081600	1	0	.	60080400	60081600	0,153,0
chr10	60081600	60106600	2	0	.	60081600	60106600	255,255,51
chr10	60106600	60107400	1	0	.	60106600	60107400	0,153,0
chr10	60107400	60110800	3	0	.	60107400	60110800	255,0,0
chr10	60110800	60148000	2	0	.	60110800	60148000	255,255,51
chr10	60148000	60148400	1	0	.	60148000	60148400	0,153,0
chr10	60148400	60157800	3	0	.	60148400	60157800	255,0,0
chr10	60157800	60160800	2	0	.	60157800	60160800	255,255,51
chr10	60160800	60166800	3	0	.	60160800	60166800	255,0,0
chr10	60166800	60183200	2	0	.	60166800	60183200	255,255,51
chr10	60183200	60197400	3	0	.	60183200	60197400	255,0,0
chr10	60197400	60202400	2	0	.	60197400	60202400	255,255,51
chr10	60202400	60207800	3	0	.	60202400	60207800	255,0,0
chr10	60207800	60214200	2	0	.	60207800	60214200	255,255,51
chr10	60214200	60224200	3	0	.	60214200	60224200	255,0,0
chr10	60224200	60229200	2	0	.	60224200	60229200	255,255,51
chr10	60229200	60232400	3	0	.	60229200	60232400	255,0,0
chr10	60232400	60246800	2	0	.	60232400	60246800	255,255,51
chr10	60246800	60277400	3	0	.	60246800	60277400	255,0,0
chr10	60277400	60280800	1	0	.	60277400	60280800	0,153,0
chr10	60280800	60281800	2	0	.	60280800	60281800	255,255,51
chr10	60281800	60283000	1	0	.	60281800	60283000	0,153,0
chr10	60283000	60284200	2	0	.	60283000	60284200	255,255,51
chr10	60284200	60285200	1	0	.	60284200	60285200	0,153,0
chr10	60285200	60287400	2	0	.	60285200	60287400	255,255,51
chr10	60287400	60288200	1	0	.	60287400	60288200	0,153,0
chr10	60288200	60290000	2	0	.	60288200	60290000	255,255,51
chr10	60290000	60290800	1	0	.	60290000	60290800	0,153,0
chr10	60290800	60291800	2	0	.	60290800	60291800	255,255,51
chr10	60291800	60292000	3	0	.	60291800	60292000	255,0,0
chr10	60292000	60292600	1	0	.	60292000	60292600	0,153,0
chr10	60292600	60332000	2	0	.	60292600	60332000	255,255,51
chr10	60332000	60332600	1	0	.	60332000	60332600	0,153,0
chr10	60332600	60346600	2	0	.	60332600	60346600	255,255,51
chr10	60346600	60352400	1	0	.	60346600	60352400	0,153,0
chr10	60352400	60370000	2	0	.	60352400	60370000	255,255,51
chr10	60370000	60372400	1	0	.	60370000	60372400	0,153,0
chr10	60372400	60381000	2	0	.	60372400	60381000	255,255,51
chr10	60381000	60382600	1	0	.	60381000	60382600	0,153,0
chr10	60382600	60388400	2	0	.	60382600	60388400	255,255,51
chr10	60388400	60391600	1	0	.	60388400	60391600	0,153,0
chr10	60391600	60395600	2	0	.	60391600	60395600	255,255,51
chr10	60395600	60396200	1	0	.	60395600	60396200	0,153,0
chr10	60396200	60411400	2	0	.	60396200	60411400	255,255,51
chr10	60411400	60411800	1	0	.	60411400	60411800	0,153,0
chr10	60411800	60566400	2	0	.	60411800	60566400	255,255,51
chr10	60566400	60567200	1	0	.	60566400	60567200	0,153,0
chr10	60567200	60573200	2	0	.	60567200	60573200	255,255,51
chr10	60573200	60573800	1	0	.	60573200	60573800	0,153,0
chr10	60573800	60658200	2	0	.	60573800	60658200	255,255,51
chr10	60658200	60658600	1	0	.	60658200	60658600	0,153,0
chr10	60658600	60678600	2	0	.	60658600	60678600	255,255,51
chr10	60678600	60686800	3	0	.	60678600	60686800	255,0,0
chr10	60686800	60687800	1	0	.	60686800	60687800	0,153,0
chr10	60687800	60689000	3	0	.	60687800	60689000	255,0,0
chr10	60689000	60752000	2	0	.	60689000	60752000	255,255,51
chr10	60752000	60753400	1	0	.	60752000	60753400	0,153,0
chr10	60753400	60799200	2	0	.	60753400	60799200	255,255,51
chr10	60799200	60808200	3	0	.	60799200	60808200	255,0,0
chr10	60808200	60809600	1	0	.	60808200	60809600	0,153,0
chr10	60809600	60816800	2	0	.	60809600	60816800	255,255,51
chr10	60816800	60817200	1	0	.	60816800	60817200	0,153,0
chr10	60817200	60826600	2	0	.	60817200	60826600	255,255,51
chr10	60826600	60829800	3	0	.	60826600	60829800	255,0,0
chr10	60829800	60832600	1	0	.	60829800	60832600	0,153,0
chr10	60832600	60843600	3	0	.	60832600	60843600	255,0,0
chr10	60843600	60933000	2	0	.	60843600	60933000	255,255,51
chr10	60933000	60933200	1	0	.	60933000	60933200	0,153,0
chr10	60933200	60933800	2	0	.	60933200	60933800	255,255,51
chr10	60933800	60934600	1	0	.	60933800	60934600	0,153,0
chr10	60934600	60958000	2	0	.	60934600	60958000	255,255,51
chr10	60958000	60958400	1	0	.	60958000	60958400	0,153,0
chr10	60958400	61145600	2	0	.	60958400	61145600	255,255,51
chr10	61145600	61148400	1	0	.	61145600	61148400	0,153,0
chr10	61148400	61168200	2	0	.	61148400	61168200	255,255,51
chr10	61168200	61184400	3	0	.	61168200	61184400	255,0,0
chr10	61184400	61233200	2	0	.	61184400	61233200	255,255,51
chr10	61233200	61233400	1	0	.	61233200	61233400	0,153,0
chr10	61233400	61258200	2	0	.	61233400	61258200	255,255,51
chr10	61258200	61258600	1	0	.	61258200	61258600	0,153,0
chr10	61258600	61260800	2	0	.	61258600	61260800	255,255,51
chr10	61260800	61264600	1	0	.	61260800	61264600	0,153,0
chr10	61264600	61267400	2	0	.	61264600	61267400	255,255,51
chr10	61267400	61267800	1	0	.	61267400	61267800	0,153,0
chr10	61267800	61268600	2	0	.	61267800	61268600	255,255,51
chr10	61268600	61278600	1	0	.	61268600	61278600	0,153,0
chr10	61278600	61279400	2	0	.	61278600	61279400	255,255,51
chr10	61279400	61282600	1	0	.	61279400	61282600	0,153,0
chr10	61282600	61290000	2	0	.	61282600	61290000	255,255,51
chr10	61290000	61291000	1	0	.	61290000	61291000	0,153,0
chr10	61291000	61296600	2	0	.	61291000	61296600	255,255,51
chr10	61296600	61307200	1	0	.	61296600	61307200	0,153,0
chr10	61307200	61308000	2	0	.	61307200	61308000	255,255,51
chr10	61308000	61308800	1	0	.	61308000	61308800	0,153,0
chr10	61308800	61318400	2	0	.	61308800	61318400	255,255,51
chr10	61318400	61318600	1	0	.	61318400	61318600	0,153,0
chr10	61318600	61319800	2	0	.	61318600	61319800	255,255,51
chr10	61319800	61320000	1	0	.	61319800	61320000	0,153,0
chr10	61320000	61326000	2	0	.	61320000	61326000	255,255,51
chr10	61326000	61328600	1	0	.	61326000	61328600	0,153,0
chr10	61328600	61334200	2	0	.	61328600	61334200	255,255,51
chr10	61334200	61336000	1	0	.	61334200	61336000	0,153,0
chr10	61336000	61336400	2	0	.	61336000	61336400	255,255,51
chr10	61336400	61336600	1	0	.	61336400	61336600	0,153,0
chr10	61336600	61381400	2	0	.	61336600	61381400	255,255,51
chr10	61381400	61383800	1	0	.	61381400	61383800	0,153,0
chr10	61383800	61407000	2	0	.	61383800	61407000	255,255,51
chr10	61407000	61421600	3	0	.	61407000	61421600	255,0,0
chr10	61421600	61450000	2	0	.	61421600	61450000	255,255,51
chr10	61450000	61453400	1	0	.	61450000	61453400	0,153,0
chr10	61453400	61475200	2	0	.	61453400	61475200	255,255,51
chr10	61475200	61477600	1	0	.	61475200	61477600	0,153,0
chr10	61477600	61559000	2	0	.	61477600	61559000	255,255,51
chr10	61559000	61560200	1	0	.	61559000	61560200	0,153,0
chr10	61560200	61593600	2	0	.	61560200	61593600	255,255,51
chr10	61593600	61600800	3	0	.	61593600	61600800	255,0,0
chr10	61600800	61602400	2	0	.	61600800	61602400	255,255,51
chr10	61602400	61603000	1	0	.	61602400	61603000	0,153,0
chr10	61603000	61624800	2	0	.	61603000	61624800	255,255,51
chr10	61624800	61626400	1	0	.	61624800	61626400	0,153,0
chr10	61626400	61639600	2	0	.	61626400	61639600	255,255,51
chr10	61639600	61642400	3	0	.	61639600	61642400	255,0,0
chr10	61642400	61647800	2	0	.	61642400	61647800	255,255,51
chr10	61647800	61650000	1	0	.	61647800	61650000	0,153,0
chr10	61650000	61675600	2	0	.	61650000	61675600	255,255,51
chr10	61675600	61676800	1	0	.	61675600	61676800	0,153,0
chr10	61676800	61677200	2	0	.	61676800	61677200	255,255,51
chr10	61677200	61677400	1	0	.	61677200	61677400	0,153,0
chr10	61677400	61679400	2	0	.	61677400	61679400	255,255,51
chr10	61679400	61682000	1	0	.	61679400	61682000	0,153,0
chr10	61682000	61694800	2	0	.	61682000	61694800	255,255,51
chr10	61694800	61697800	1	0	.	61694800	61697800	0,153,0
chr10	61697800	61715200	2	0	.	61697800	61715200	255,255,51
chr10	61715200	61716400	1	0	.	61715200	61716400	0,153,0
chr10	61716400	61745800	2	0	.	61716400	61745800	255,255,51
chr10	61745800	61746400	1	0	.	61745800	61746400	0,153,0
chr10	61746400	61780400	2	0	.	61746400	61780400	255,255,51
chr10	61780400	61782800	3	0	.	61780400	61782800	255,0,0
chr10	61782800	61784200	1	0	.	61782800	61784200	0,153,0
chr10	61784200	61785600	3	0	.	61784200	61785600	255,0,0
chr10	61785600	61869000	2	0	.	61785600	61869000	255,255,51
chr10	61869000	61872600	3	0	.	61869000	61872600	255,0,0
chr10	61872600	61927800	2	0	.	61872600	61927800	255,255,51
chr10	61927800	61929200	3	0	.	61927800	61929200	255,0,0
chr10	61929200	61936000	2	0	.	61929200	61936000	255,255,51
chr10	61936000	61938800	3	0	.	61936000	61938800	255,0,0
chr10	61938800	61974200	2	0	.	61938800	61974200	255,255,51
chr10	61974200	61982400	3	0	.	61974200	61982400	255,0,0
chr10	61982400	62110400	2	0	.	61982400	62110400	255,255,51
chr10	62110400	62111200	1	0	.	62110400	62111200	0,153,0
chr10	62111200	62113800	2	0	.	62111200	62113800	255,255,51
chr10	62113800	62117000	3	0	.	62113800	62117000	255,0,0
chr10	62117000	62124600	2	0	.	62117000	62124600	255,255,51
chr10	62124600	62137200	3	0	.	62124600	62137200	255,0,0
chr10	62137200	62159800	2	0	.	62137200	62159800	255,255,51
chr10	62159800	62160200	3	0	.	62159800	62160200	255,0,0
chr10	62160200	62184200	2	0	.	62160200	62184200	255,255,51
chr10	62184200	62189000	3	0	.	62184200	62189000	255,0,0
chr10	62189000	62195000	2	0	.	62189000	62195000	255,255,51
chr10	62195000	62195800	1	0	.	62195000	62195800	0,153,0
chr10	62195800	62196000	3	0	.	62195800	62196000	255,0,0
chr10	62196000	62212600	2	0	.	62196000	62212600	255,255,51
chr10	62212600	62212800	1	0	.	62212600	62212800	0,153,0
chr10	62212800	62229200	2	0	.	62212800	62229200	255,255,51
chr10	62229200	62230800	3	0	.	62229200	62230800	255,0,0
chr10	62230800	62231600	1	0	.	62230800	62231600	0,153,0
chr10	62231600	62234800	3	0	.	62231600	62234800	255,0,0
chr10	62234800	62326000	2	0	.	62234800	62326000	255,255,51
chr10	62326000	62329600	1	0	.	62326000	62329600	0,153,0
chr10	62329600	62337400	2	0	.	62329600	62337400	255,255,51
chr10	62337400	62342000	1	0	.	62337400	62342000	0,153,0
chr10	62342000	62397800	2	0	.	62342000	62397800	255,255,51
chr10	62397800	62398400	3	0	.	62397800	62398400	255,0,0
chr10	62398400	62404800	2	0	.	62398400	62404800	255,255,51
chr10	62404800	62406400	3	0	.	62404800	62406400	255,0,0
chr10	62406400	62448400	2	0	.	62406400	62448400	255,255,51
chr10	62448400	62450400	1	0	.	62448400	62450400	0,153,0
chr10	62450400	62477400	2	0	.	62450400	62477400	255,255,51
chr10	62477400	62477800	1	0	.	62477400	62477800	0,153,0
chr10	62477800	62485000	2	0	.	62477800	62485000	255,255,51
chr10	62485000	62487800	1	0	.	62485000	62487800	0,153,0
chr10	62487800	62488400	2	0	.	62487800	62488400	255,255,51
chr10	62488400	62488600	1	0	.	62488400	62488600	0,153,0
chr10	62488600	62500200	2	0	.	62488600	62500200	255,255,51
chr10	62500200	62509600	1	0	.	62500200	62509600	0,153,0
chr10	62509600	62511200	2	0	.	62509600	62511200	255,255,51
chr10	62511200	62512200	1	0	.	62511200	62512200	0,153,0
chr10	62512200	62529800	2	0	.	62512200	62529800	255,255,51
chr10	62529800	62532800	3	0	.	62529800	62532800	255,0,0
chr10	62532800	62533400	1	0	.	62532800	62533400	0,153,0
chr10	62533400	62543000	2	0	.	62533400	62543000	255,255,51
chr10	62543000	62545000	1	0	.	62543000	62545000	0,153,0
chr10	62545000	62550000	2	0	.	62545000	62550000	255,255,51
chr10	62550000	62550200	1	0	.	62550000	62550200	0,153,0
chr10	62550200	62553600	2	0	.	62550200	62553600	255,255,51
chr10	62553600	62554200	1	0	.	62553600	62554200	0,153,0
chr10	62554200	62577400	2	0	.	62554200	62577400	255,255,51
chr10	62577400	62579000	1	0	.	62577400	62579000	0,153,0
chr10	62579000	62590200	2	0	.	62579000	62590200	255,255,51
chr10	62590200	62590600	1	0	.	62590200	62590600	0,153,0
chr10	62590600	62599800	2	0	.	62590600	62599800	255,255,51
chr10	62599800	62604000	1	0	.	62599800	62604000	0,153,0
chr10	62604000	62648600	2	0	.	62604000	62648600	255,255,51
chr10	62648600	62652600	1	0	.	62648600	62652600	0,153,0
chr10	62652600	62664800	2	0	.	62652600	62664800	255,255,51
chr10	62664800	62666400	1	0	.	62664800	62666400	0,153,0
chr10	62666400	62667200	2	0	.	62666400	62667200	255,255,51
chr10	62667200	62668200	3	0	.	62667200	62668200	255,0,0
chr10	62668200	62693400	2	0	.	62668200	62693400	255,255,51
chr10	62693400	62701000	3	0	.	62693400	62701000	255,0,0
chr10	62701000	62725600	2	0	.	62701000	62725600	255,255,51
chr10	62725600	62726600	1	0	.	62725600	62726600	0,153,0
chr10	62726600	62727800	2	0	.	62726600	62727800	255,255,51
chr10	62727800	62728000	3	0	.	62727800	62728000	255,0,0
chr10	62728000	62790800	2	0	.	62728000	62790800	255,255,51
chr10	62790800	62793600	1	0	.	62790800	62793600	0,153,0
chr10	62793600	62800600	2	0	.	62793600	62800600	255,255,51
chr10	62800600	62801000	1	0	.	62800600	62801000	0,153,0
chr10	62801000	62863600	2	0	.	62801000	62863600	255,255,51
chr10	62863600	62866200	1	0	.	62863600	62866200	0,153,0
chr10	62866200	62884600	2	0	.	62866200	62884600	255,255,51
chr10	62884600	62885800	3	0	.	62884600	62885800	255,0,0
chr10	62885800	62887200	1	0	.	62885800	62887200	0,153,0
chr10	62887200	62888800	3	0	.	62887200	62888800	255,0,0
chr10	62888800	62905200	2	0	.	62888800	62905200	255,255,51
chr10	62905200	62907600	3	0	.	62905200	62907600	255,0,0
chr10	62907600	62919600	2	0	.	62907600	62919600	255,255,51
chr10	62919600	62922000	1	0	.	62919600	62922000	0,153,0
chr10	62922000	62946400	2	0	.	62922000	62946400	255,255,51
chr10	62946400	62948800	1	0	.	62946400	62948800	0,153,0
chr10	62948800	62980000	2	0	.	62948800	62980000	255,255,51
chr10	62980000	62981200	1	0	.	62980000	62981200	0,153,0
chr10	62981200	62983800	2	0	.	62981200	62983800	255,255,51
chr10	62983800	62984800	1	0	.	62983800	62984800	0,153,0
chr10	62984800	63019600	2	0	.	62984800	63019600	255,255,51
chr10	63019600	63019800	1	0	.	63019600	63019800	0,153,0
chr10	63019800	63020200	2	0	.	63019800	63020200	255,255,51
chr10	63020200	63025200	1	0	.	63020200	63025200	0,153,0
chr10	63025200	63089000	2	0	.	63025200	63089000	255,255,51
chr10	63089000	63089600	1	0	.	63089000	63089600	0,153,0
chr10	63089600	63096200	2	0	.	63089600	63096200	255,255,51
chr10	63096200	63102200	3	0	.	63096200	63102200	255,0,0
chr10	63102200	63176000	2	0	.	63102200	63176000	255,255,51
chr10	63176000	63177600	1	0	.	63176000	63177600	0,153,0
chr10	63177600	63231400	2	0	.	63177600	63231400	255,255,51
chr10	63231400	63232000	1	0	.	63231400	63232000	0,153,0
chr10	63232000	63242600	2	0	.	63232000	63242600	255,255,51
chr10	63242600	63248000	1	0	.	63242600	63248000	0,153,0
chr10	63248000	63327200	2	0	.	63248000	63327200	255,255,51
chr10	63327200	63327400	1	0	.	63327200	63327400	0,153,0
chr10	63327400	63336800	2	0	.	63327400	63336800	255,255,51
chr10	63336800	63340000	1	0	.	63336800	63340000	0,153,0
chr10	63340000	63377600	2	0	.	63340000	63377600	255,255,51
chr10	63377600	63377800	1	0	.	63377600	63377800	0,153,0
chr10	63377800	63381400	2	0	.	63377800	63381400	255,255,51
chr10	63381400	63383000	1	0	.	63381400	63383000	0,153,0
chr10	63383000	63385800	2	0	.	63383000	63385800	255,255,51
chr10	63385800	63387400	1	0	.	63385800	63387400	0,153,0
chr10	63387400	63428200	2	0	.	63387400	63428200	255,255,51
chr10	63428200	63430600	1	0	.	63428200	63430600	0,153,0
chr10	63430600	63571400	2	0	.	63430600	63571400	255,255,51
chr10	63571400	63572400	1	0	.	63571400	63572400	0,153,0
chr10	63572400	63614000	2	0	.	63572400	63614000	255,255,51
chr10	63614000	63614400	1	0	.	63614000	63614400	0,153,0
chr10	63614400	63633600	2	0	.	63614400	63633600	255,255,51
chr10	63633600	63634400	1	0	.	63633600	63634400	0,153,0
chr10	63634400	66853200	2	0	.	63634400	66853200	255,255,51
chr10	66853200	66854000	1	0	.	66853200	66854000	0,153,0
chr10	66854000	66863600	2	0	.	66854000	66863600	255,255,51
chr10	66863600	66865200	1	0	.	66863600	66865200	0,153,0
chr10	66865200	66869800	2	0	.	66865200	66869800	255,255,51
chr10	66869800	66871600	1	0	.	66869800	66871600	0,153,0
chr10	66871600	66930600	2	0	.	66871600	66930600	255,255,51
chr10	66930600	66931000	1	0	.	66930600	66931000	0,153,0
chr10	66931000	66952800	2	0	.	66931000	66952800	255,255,51
chr10	66952800	66954200	1	0	.	66952800	66954200	0,153,0
chr10	66954200	67004000	2	0	.	66954200	67004000	255,255,51
chr10	67004000	67006000	1	0	.	67004000	67006000	0,153,0
chr10	67006000	67047800	2	0	.	67006000	67047800	255,255,51
chr10	67047800	67048000	1	0	.	67047800	67048000	0,153,0
chr10	67048000	67049000	2	0	.	67048000	67049000	255,255,51
chr10	67049000	67049800	1	0	.	67049000	67049800	0,153,0
chr10	67049800	67052000	2	0	.	67049800	67052000	255,255,51
chr10	67052000	67052800	1	0	.	67052000	67052800	0,153,0
chr10	67052800	67065200	2	0	.	67052800	67065200	255,255,51
chr10	67065200	67066400	1	0	.	67065200	67066400	0,153,0
chr10	67066400	67068400	2	0	.	67066400	67068400	255,255,51
chr10	67068400	67070000	1	0	.	67068400	67070000	0,153,0
chr10	67070000	67071400	2	0	.	67070000	67071400	255,255,51
chr10	67071400	67072200	1	0	.	67071400	67072200	0,153,0
chr10	67072200	67095600	2	0	.	67072200	67095600	255,255,51
chr10	67095600	67099400	1	0	.	67095600	67099400	0,153,0
chr10	67099400	67100200	2	0	.	67099400	67100200	255,255,51
chr10	67100200	67100600	1	0	.	67100200	67100600	0,153,0
chr10	67100600	67111800	2	0	.	67100600	67111800	255,255,51
chr10	67111800	67112400	1	0	.	67111800	67112400	0,153,0
chr10	67112400	67124000	2	0	.	67112400	67124000	255,255,51
chr10	67124000	67124600	1	0	.	67124000	67124600	0,153,0
chr10	67124600	67126200	2	0	.	67124600	67126200	255,255,51
chr10	67126200	67128000	1	0	.	67126200	67128000	0,153,0
chr10	67128000	67182800	2	0	.	67128000	67182800	255,255,51
chr10	67182800	67183600	1	0	.	67182800	67183600	0,153,0
chr10	67183600	67184400	2	0	.	67183600	67184400	255,255,51
chr10	67184400	67190800	1	0	.	67184400	67190800	0,153,0
chr10	67190800	67196400	2	0	.	67190800	67196400	255,255,51
chr10	67196400	67198000	1	0	.	67196400	67198000	0,153,0
chr10	67198000	67200200	2	0	.	67198000	67200200	255,255,51
chr10	67200200	67210800	1	0	.	67200200	67210800	0,153,0
chr10	67210800	67282600	2	0	.	67210800	67282600	255,255,51
chr10	67282600	67285800	1	0	.	67282600	67285800	0,153,0
chr10	67285800	67311400	2	0	.	67285800	67311400	255,255,51
chr10	67311400	67311800	1	0	.	67311400	67311800	0,153,0
chr10	67311800	67315000	2	0	.	67311800	67315000	255,255,51
chr10	67315000	67315400	1	0	.	67315000	67315400	0,153,0
chr10	67315400	67462000	2	0	.	67315400	67462000	255,255,51
chr10	67462000	67464800	3	0	.	67462000	67464800	255,0,0
chr10	67464800	67497200	2	0	.	67464800	67497200	255,255,51
chr10	67497200	67498200	1	0	.	67497200	67498200	0,153,0
chr10	67498200	67503000	2	0	.	67498200	67503000	255,255,51
chr10	67503000	67504400	1	0	.	67503000	67504400	0,153,0
chr10	67504400	67530800	2	0	.	67504400	67530800	255,255,51
chr10	67530800	67535000	3	0	.	67530800	67535000	255,0,0
chr10	67535000	67539800	1	0	.	67535000	67539800	0,153,0
chr10	67539800	67545600	2	0	.	67539800	67545600	255,255,51
chr10	67545600	67550400	1	0	.	67545600	67550400	0,153,0
chr10	67550400	67581800	2	0	.	67550400	67581800	255,255,51
chr10	67581800	67582400	1	0	.	67581800	67582400	0,153,0
chr10	67582400	67586000	2	0	.	67582400	67586000	255,255,51
chr10	67586000	67586800	1	0	.	67586000	67586800	0,153,0
chr10	67586800	67606400	2	0	.	67586800	67606400	255,255,51
chr10	67606400	67608200	1	0	.	67606400	67608200	0,153,0
chr10	67608200	67610200	2	0	.	67608200	67610200	255,255,51
chr10	67610200	67611400	1	0	.	67610200	67611400	0,153,0
chr10	67611400	67620000	2	0	.	67611400	67620000	255,255,51
chr10	67620000	67620600	1	0	.	67620000	67620600	0,153,0
chr10	67620600	67636600	2	0	.	67620600	67636600	255,255,51
chr10	67636600	67637600	1	0	.	67636600	67637600	0,153,0
chr10	67637600	67643400	2	0	.	67637600	67643400	255,255,51
chr10	67643400	67645600	1	0	.	67643400	67645600	0,153,0
chr10	67645600	67646600	2	0	.	67645600	67646600	255,255,51
chr10	67646600	67649200	1	0	.	67646600	67649200	0,153,0
chr10	67649200	67657200	2	0	.	67649200	67657200	255,255,51
chr10	67657200	67658800	1	0	.	67657200	67658800	0,153,0
chr10	67658800	67662800	2	0	.	67658800	67662800	255,255,51
chr10	67662800	67664000	1	0	.	67662800	67664000	0,153,0
chr10	67664000	67684800	2	0	.	67664000	67684800	255,255,51
chr10	67684800	67685000	1	0	.	67684800	67685000	0,153,0
chr10	67685000	67701600	2	0	.	67685000	67701600	255,255,51
chr10	67701600	67703600	1	0	.	67701600	67703600	0,153,0
chr10	67703600	67715800	2	0	.	67703600	67715800	255,255,51
chr10	67715800	67718000	1	0	.	67715800	67718000	0,153,0
chr10	67718000	67727200	2	0	.	67718000	67727200	255,255,51
chr10	67727200	67729000	1	0	.	67727200	67729000	0,153,0
chr10	67729000	67733400	2	0	.	67729000	67733400	255,255,51
chr10	67733400	67736400	3	0	.	67733400	67736400	255,0,0
chr10	67736400	67910600	2	0	.	67736400	67910600	255,255,51
chr10	67910600	67911800	3	0	.	67910600	67911800	255,0,0
chr10	67911800	67912200	1	0	.	67911800	67912200	0,153,0
chr10	67912200	67979000	2	0	.	67912200	67979000	255,255,51
chr10	67979000	67980600	1	0	.	67979000	67980600	0,153,0
chr10	67980600	68080000	2	0	.	67980600	68080000	255,255,51
chr10	68080000	68080600	1	0	.	68080000	68080600	0,153,0
chr10	68080600	68105000	2	0	.	68080600	68105000	255,255,51
chr10	68105000	68105800	1	0	.	68105000	68105800	0,153,0
chr10	68105800	68146800	2	0	.	68105800	68146800	255,255,51
chr10	68146800	68147400	1	0	.	68146800	68147400	0,153,0
chr10	68147400	68191600	2	0	.	68147400	68191600	255,255,51
chr10	68191600	68193800	1	0	.	68191600	68193800	0,153,0
chr10	68193800	68199400	2	0	.	68193800	68199400	255,255,51
chr10	68199400	68200200	1	0	.	68199400	68200200	0,153,0
chr10	68200200	68207400	2	0	.	68200200	68207400	255,255,51
chr10	68207400	68208200	1	0	.	68207400	68208200	0,153,0
chr10	68208200	68221600	2	0	.	68208200	68221600	255,255,51
chr10	68221600	68222800	1	0	.	68221600	68222800	0,153,0
chr10	68222800	68238000	2	0	.	68222800	68238000	255,255,51
chr10	68238000	68242400	1	0	.	68238000	68242400	0,153,0
chr10	68242400	68246600	2	0	.	68242400	68246600	255,255,51
chr10	68246600	68250000	1	0	.	68246600	68250000	0,153,0
chr10	68250000	68268200	2	0	.	68250000	68268200	255,255,51
chr10	68268200	68269400	1	0	.	68268200	68269400	0,153,0
chr10	68269400	68275200	2	0	.	68269400	68275200	255,255,51
chr10	68275200	68281600	1	0	.	68275200	68281600	0,153,0
chr10	68281600	68282400	2	0	.	68281600	68282400	255,255,51
chr10	68282400	68283600	1	0	.	68282400	68283600	0,153,0
chr10	68283600	68445800	2	0	.	68283600	68445800	255,255,51
chr10	68445800	68446400	1	0	.	68445800	68446400	0,153,0
chr10	68446400	68472600	2	0	.	68446400	68472600	255,255,51
chr10	68472600	68473800	1	0	.	68472600	68473800	0,153,0
chr10	68473800	68510000	2	0	.	68473800	68510000	255,255,51
chr10	68510000	68513200	1	0	.	68510000	68513200	0,153,0
chr10	68513200	68524000	2	0	.	68513200	68524000	255,255,51
chr10	68524000	68525400	1	0	.	68524000	68525400	0,153,0
chr10	68525400	68540800	2	0	.	68525400	68540800	255,255,51
chr10	68540800	68542400	1	0	.	68540800	68542400	0,153,0
chr10	68542400	68673200	2	0	.	68542400	68673200	255,255,51
chr10	68673200	68674200	1	0	.	68673200	68674200	0,153,0
chr10	68674200	68724200	2	0	.	68674200	68724200	255,255,51
chr10	68724200	68724800	1	0	.	68724200	68724800	0,153,0
[truncated: 85,593 more rows]
