# Supplementary figures and images for: Binary outcomes of enhancer activity underlie stable random monoallelic expression
Source: eLife journal article supplement (doi:10.7554/elife.74204), 2022-03-22

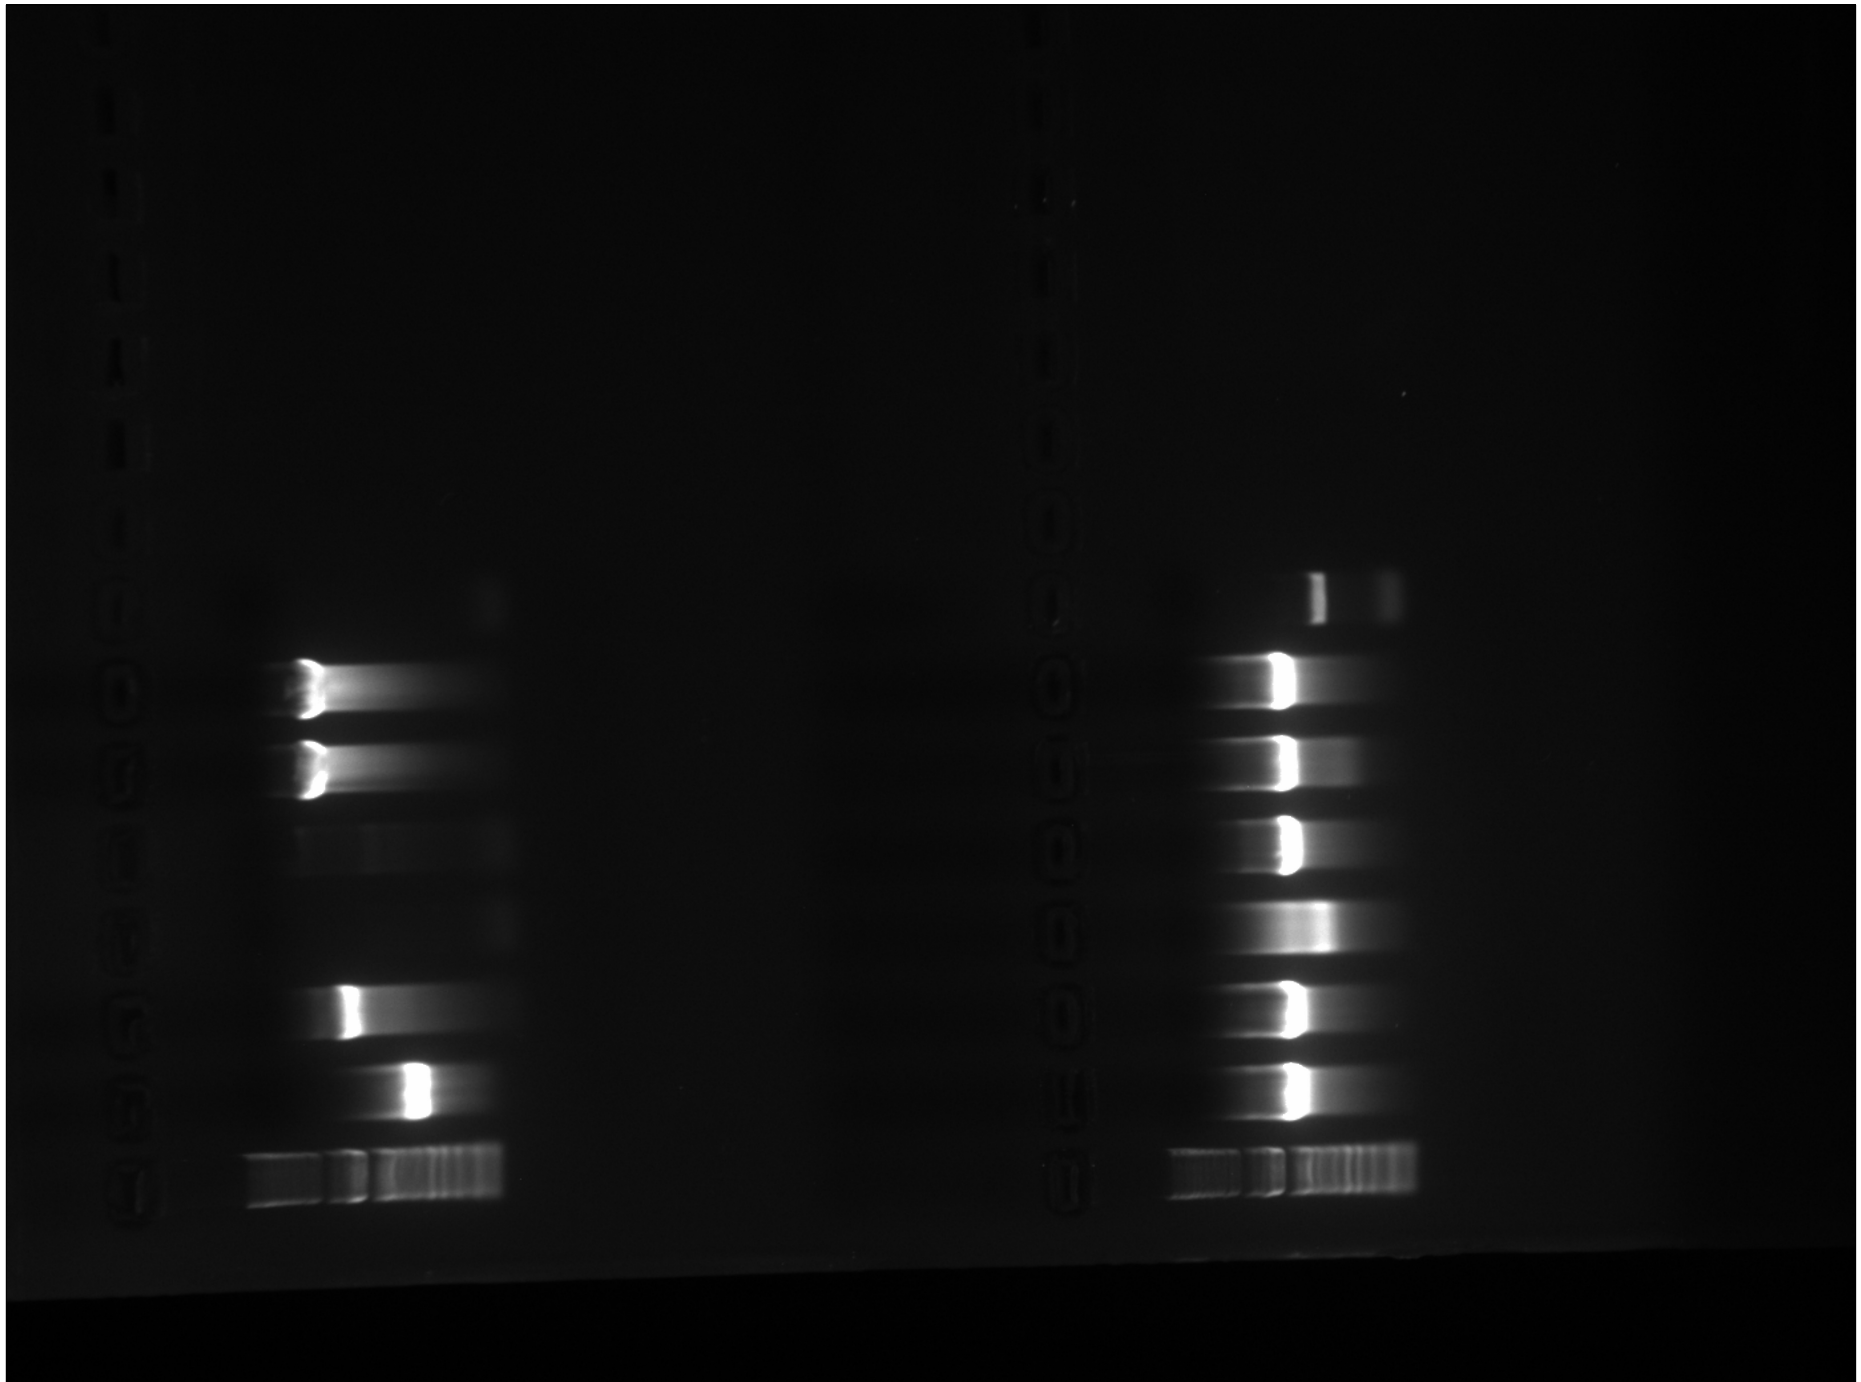

Supplement: data2 [file Figure1--figure supplement 2 E.pdf › Original gel images/Figure1--figure supplement 2 E.pdf]

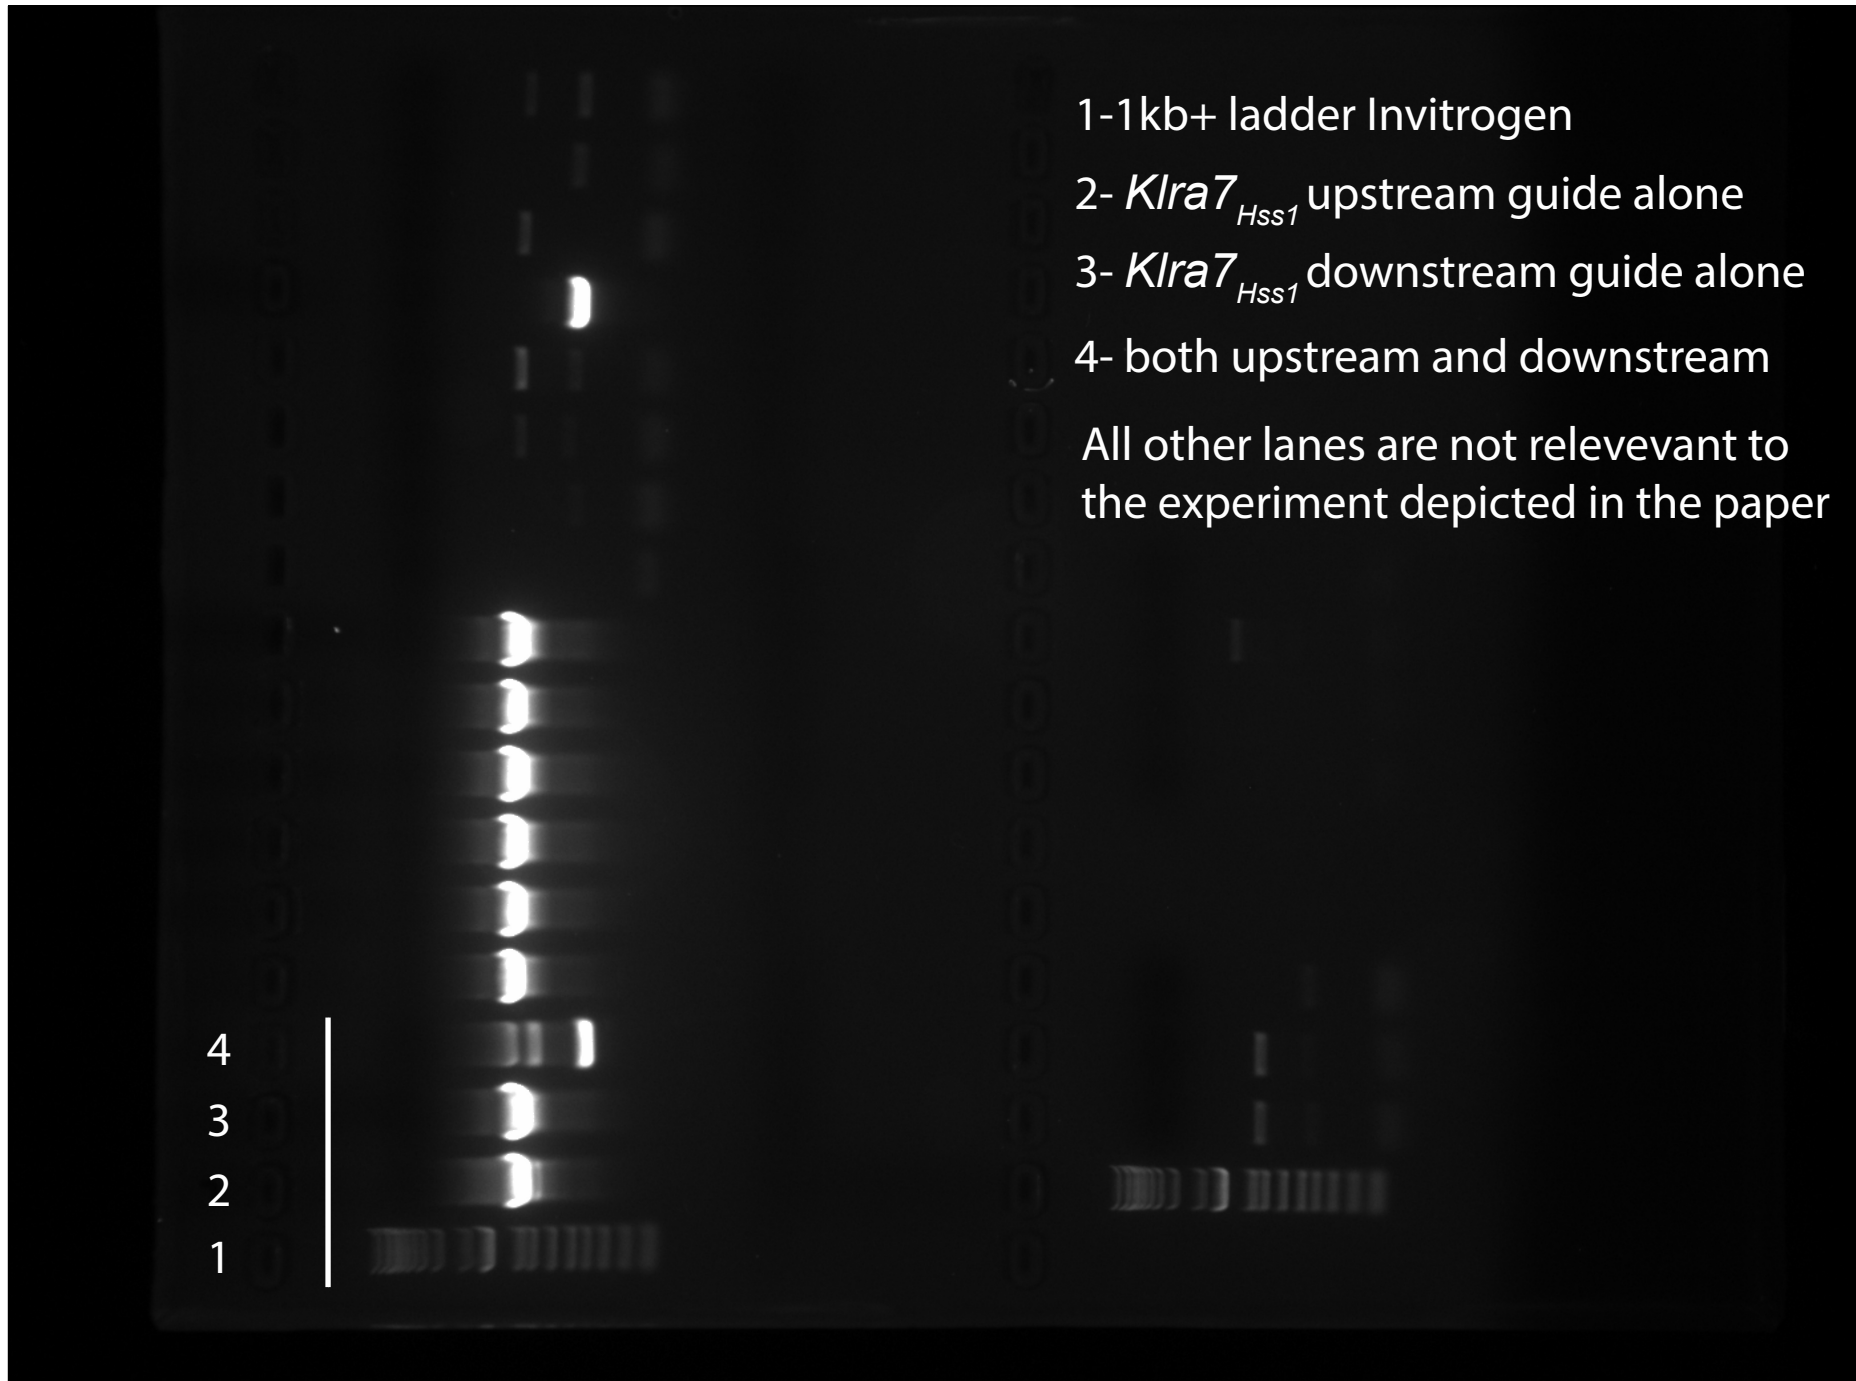

Supplement: data2 [file Figure1--figure supplement 2 H annotated.pdf › Original gel images/Figure1--figure supplement 2 H annotated.pdf]

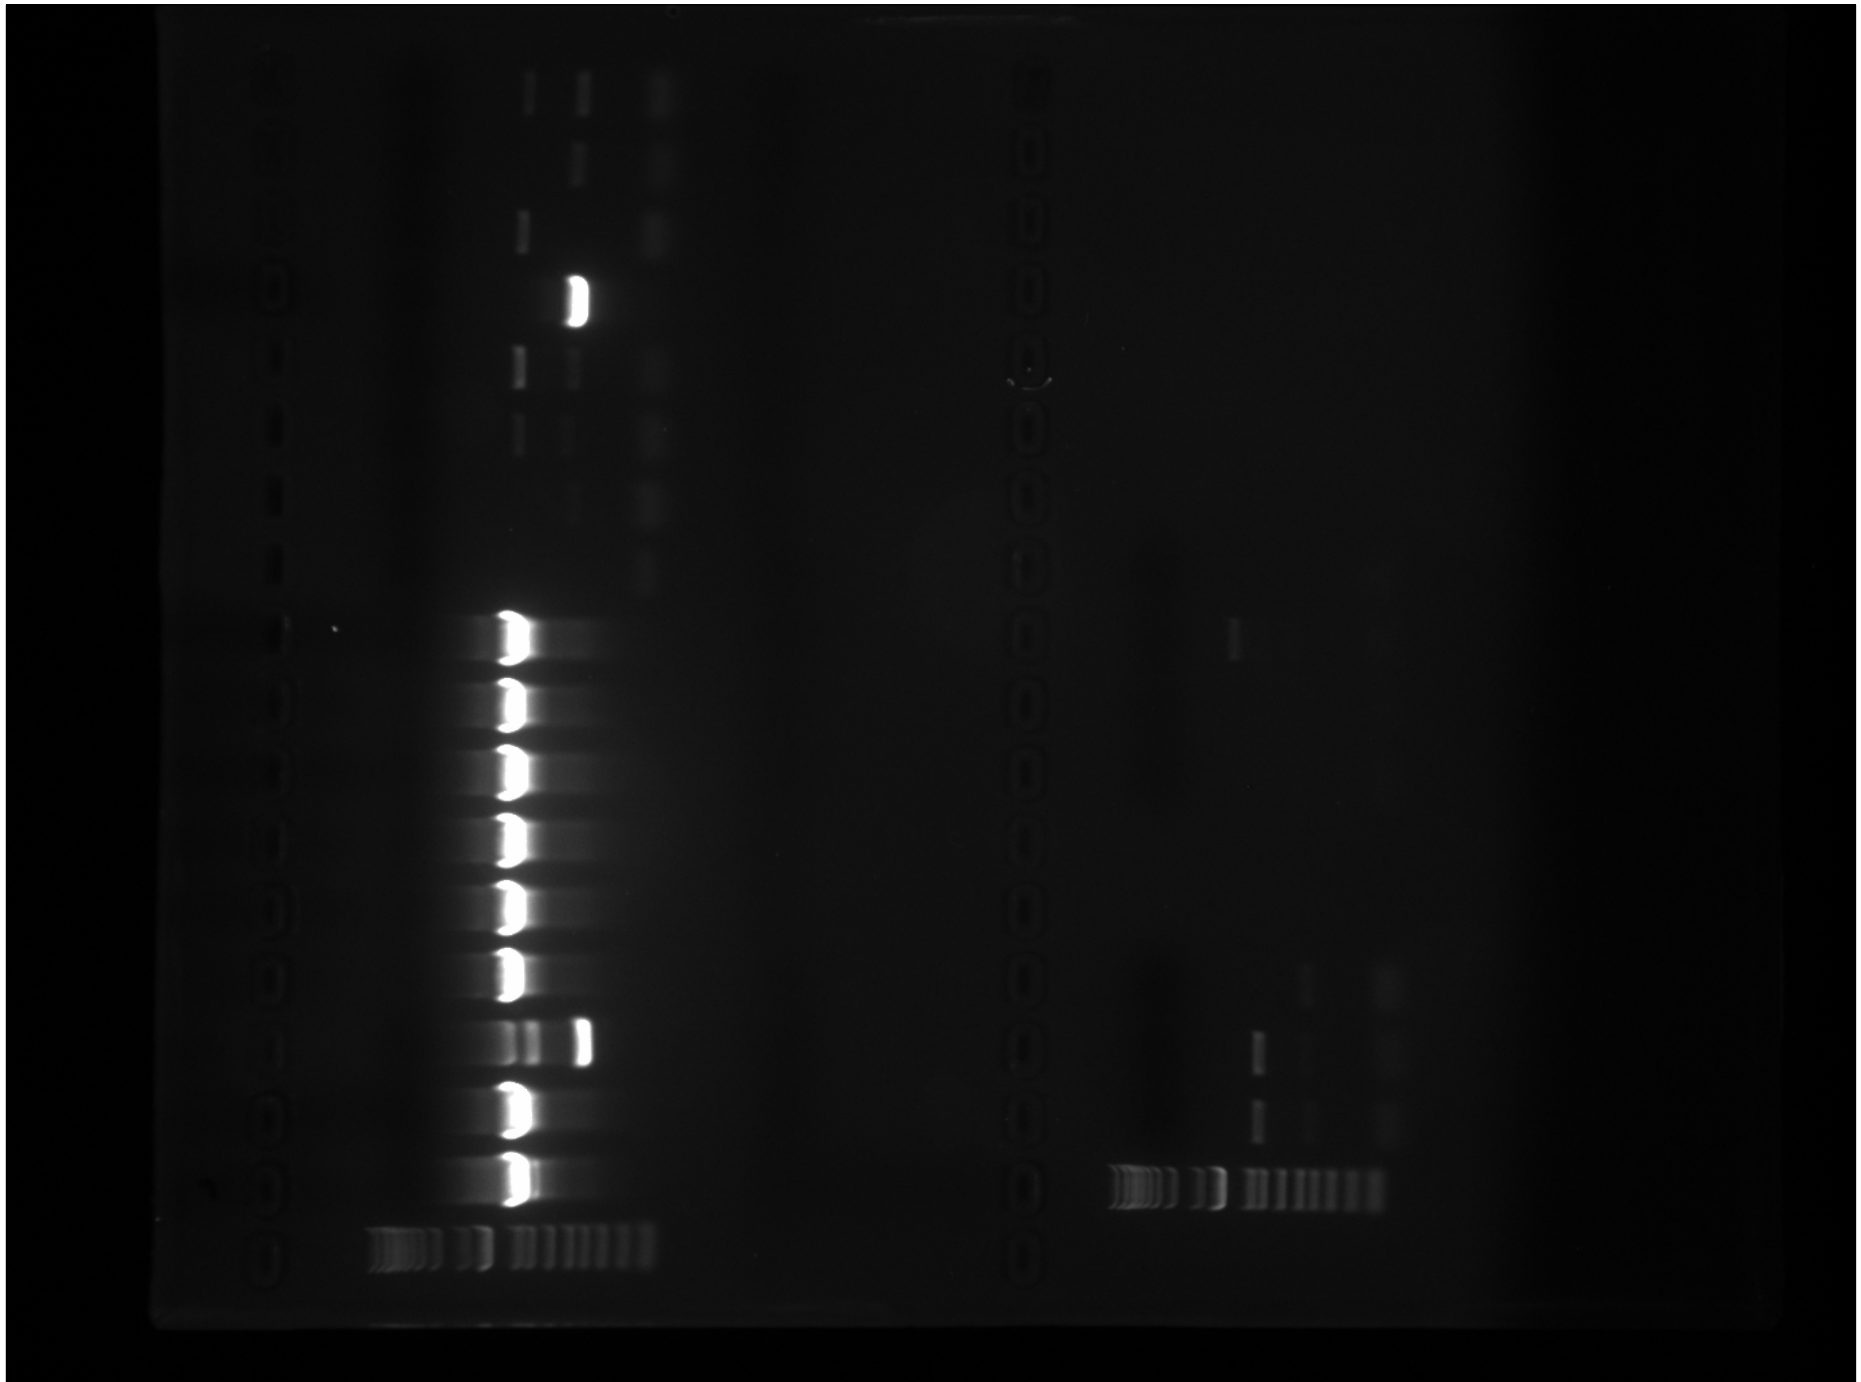

Supplement: data2 [file Figure1--figure supplement 2 H.pdf › Original gel images/Figure1--figure supplement 2 H.pdf]
